# Supplementary material
Source: publisher figshare collection journal article supplement (https://tandf.figshare.com/articles/dataset/_/9600425)
Supplement: Supplementary file 1 [file 1]

Archive with 2 entries (2 files):
- taje_a_1648317_sm9039.xlsx
- taje_a_1648317_sm9038.pdf
