# Supplementary material
Source: publisher figshare collection journal article supplement (https://tandf.figshare.com/articles/dataset/_/9600425)
Supplement: Supplementary file 1 [file 1 › taje_a_1648317_sm9038.pdf]

## **Sedimentological responses to the Hunter-Bowen Orogeny (eastern Australia): evidence from the northern Gympie Terrane**

G. Rosenbaum\*, A. Slade and D. Hoy

School of Earth and Environmental Sciences, The University of Queensland, Brisbane 4072, Australia

\*E-mail: [g.rosenbaum@uq.edu.au](mailto:g.rosenbaum@uq.edu.au)

Gideon Rosenbaum: <https://orcid.org/0000-0002-2544-093X>

Derek Hoy: <https://orcid.org/0000-0002-3052-6383>

### **SUPPLEMENTARY PAPERS**

*Australian Journal of Earth Sciences* (2020) 67, <https://doi.org/10.1080/08120099.2019.1648317>

Copies of Supplementary Papers may be obtained from the Geological Society of Australia's website ([www.gsa.org.au](http://www.gsa.org.au)), the Australian Journal of Earth Sciences website ([www.ajes.com.au](http://www.ajes.com.au)) or from the National Library of Australia's Pandora archive (<https://pandora.nla.gov.au/tep/150555>).

---

### **Supplementary paper**

Table S1. U–Pb analyses of detrital zircon grains (Excel file).

Figure S1. Representative cathodoluminescence (CL) images of detrital zircon grains and their corresponding  $^{206}\text{Pb}/^{238}\text{U}$  ages.

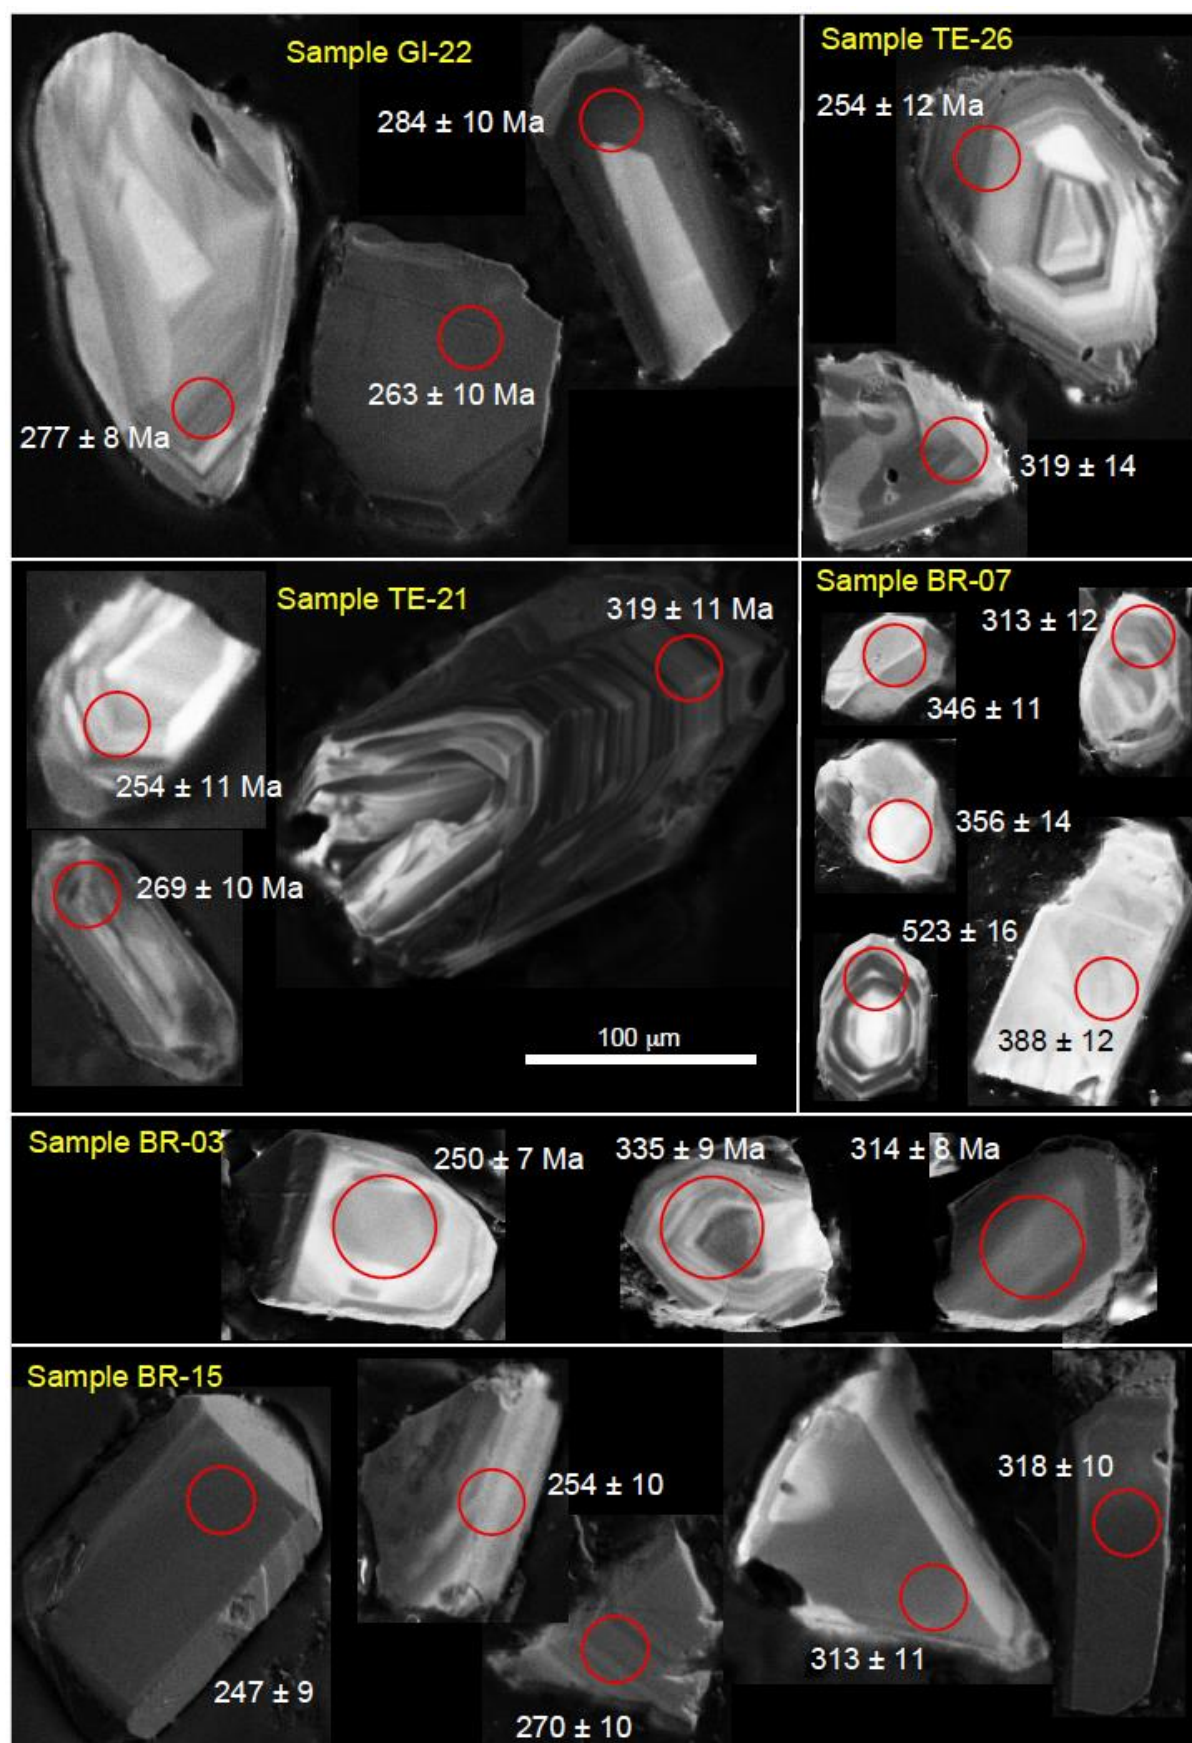

Figure S1. Representative cathodoluminescence (CL) images of detrital zircon grains and their corresponding  $^{206}\text{Pb}/^{238}\text{U}$  ages.
