# Supplementary material
Source: publisher figshare collection journal article supplement (https://tandf.figshare.com/articles/dataset/_/9600425)
Supplement: Supplementary file 1 [file 1 › taje_a_1648317_sm9039.xlsx]

## Sheet: PlotDat4
Source sheet	Sedimentry	0.2	299.259	1	311.1	7.03	0.85	304.07
Plot name	Average1	477.8	299.259	2	304	4.5	1.15	304.07
Plot Type	15			3	239.6	5.06	1.15	318.13
1st free col	8			4	241	5.27	0.85	318.13
Sigma Level	1			5	286.6	4.5	0.85	304.07
Absolute Errs	TRUE			6	252.6	3.24	ErrBox	ErrBox
Symbol Type	1			7	251.8	3.84	1.85	299.5
Inverse Plot	FALSE			8	329.2	4.84	2.15	299.5
Color Plot	TRUE			9	261.5	4.02	2.15	308.5
3D plot	FALSE			10	311.9	4.09	1.85	308.5
Linear	FALSE			11	313.4	4.02	1.85	299.5
Data Range	AA2:AB648			12	339.2	5.01	ErrBox	ErrBox
Filled Symbols	TRUE			13	243.2	3.81	2.85	234.54
ConcAge	FALSE			14	265.1	4.64	3.15	234.54
ConcSwap	FALSE			15	248.6	4.02	3.15	244.66
1st Symbol-row	1			16	558.7	6.39	2.85	244.66
				17	277.1	10.82	2.85	234.54
				18	251.4	3.94	ErrBox	ErrBox
				19	238.2	3.35	3.85	235.73
				20	250.2	5.02	4.15	235.73
				21	288.5	6.74	4.15	246.27
				22	257.3	5.13	3.85	246.27
				23	249.1	3.71	3.85	235.73
				24	313.7	5.23	ErrBox	ErrBox
				25	259.2	4.61	4.85	282.1
				26	248	4.91	5.15	282.1
				27	269.6	5.9	5.15	291.1
				28	295.8	4.65	4.85	291.1
				29	1663.1	31.46	4.85	282.1
				30	254.2	3.25	ErrBox	ErrBox
				31	265.8	5.5	5.85	249.36
				32	325.2	6.77	6.15	249.36
				33	254	5.36	6.15	255.84
				34	275.1	5.96	5.85	255.84
				35	323.8	6.8	5.85	249.36
				36	347.1	8.83	ErrBox	ErrBox
				37	240.5	5.28	6.85	247.96
				38	297.4	3.48	7.15	247.96
				39	275.9	3.74	7.15	255.64
				40	239.6	4.96	6.85	255.64
				41	298.4	7.4	6.85	247.96
				42	257.5	3.38	ErrBox	ErrBox
				43	251.3	3.91	7.85	324.36
				44	239.2	7.58	8.15	324.36
				45	252.5	5.1	8.15	334.04
				46	300.6	3.76	7.85	334.04
				47	246.4	4.42	7.85	324.36
				48	248.2	5.52	ErrBox	ErrBox
				49	254.3	5.73	8.85	257.48
				50	268	4.37	9.15	257.48
				51	251.1	4.7	9.15	265.52
				52	249.7	4.35	8.85	265.52
				53	259	3.71	8.85	257.48
				54	243.2	5.12	ErrBox	ErrBox
				55	265.5	3.5	9.85	307.81
				56	252.6	4.9	10.15	307.81
				57	268.4	4.59	10.15	315.99
				58	258.6	4.14	9.85	315.99
				59	272.7	3.99	9.85	307.81
				60	260.5	5.52	ErrBox	ErrBox
				61	260.3	5.16	10.85	309.38
				62	266.3	4.24	11.15	309.38
				63	256.6	6.18	11.15	317.42
				64	301.2	4.62	10.85	317.42
				65	259.6	4.43	10.85	309.38
				66	239	6.52	ErrBox	ErrBox
				67	284.1	6.55	11.85	334.19
				68	261.8	4.95	12.15	334.19
				69	270.6	6.63	12.15	344.21
				70	261.1	4.79	11.85	344.21
				71	266.5	3.7	11.85	334.19
				72	241.8	7.18	ErrBox	ErrBox
				73	255.5	4.38	12.85	239.39
				74	242.9	4.3	13.15	239.39
				75	261.1	5.17	13.15	247.01
				76	297.3	3.61	12.85	247.01
				77	263.2	4.43	12.85	239.39
				78	260.4	4.3	ErrBox	ErrBox
				79	261.2	4.47	13.85	260.46
				80	249	4.58	14.15	260.46
				81	255.7	5.11	14.15	269.74
				82	300.3	6.05	13.85	269.74
				83	228.6	5.14	13.85	260.46
				84	407.6	5.19	ErrBox	ErrBox
				85	236.3	4.95	14.85	244.58
				86	241	4.09	15.15	244.58
				87	263	6.1	15.15	252.62
				88	290.4	9.05	14.85	252.62
				89	335.4	5.09	14.85	244.58
				90	237.5	5.19	ErrBox	ErrBox
				91	293.2	5.04	15.85	552.31
				92	904.2	12.86	16.15	552.31
				93	299.1	5.4	16.15	565.09
				94	238.4	4.78	15.85	565.09
				95	388.5	6.25	15.85	552.31
				96	868	7.24	ErrBox	ErrBox
				97	325.4	7.48	16.85	266.28
				98	247.7	5.81	17.15	266.28
				99	253	4.49	17.15	287.92
				100	236.1	4.76	16.85	287.92
				101	252	6.53	16.85	266.28
				102	292.3	5.58	ErrBox	ErrBox
				103	347.7	6.45	17.85	247.46
				104	485.8	6.99	18.15	247.46
				105	289.8	4.13	18.15	255.34
				106	1506.4	24.22	17.85	255.34
				107	337.9	4.61	17.85	247.46
				108	294.6	4.66	ErrBox	ErrBox
				109	256.4	5.6	18.85	234.85
				110	256.5	3.93	19.15	234.85
				111	332.1	6.25	19.15	241.55
				112	328.9	8.05	18.85	241.55
				113	241.2	5.05	18.85	234.85
				114	295.2	4.85	ErrBox	ErrBox
				115	301.4	7.94	19.85	245.18
				116	329.2	6.16	20.15	245.18
				117	299.5	3.72	20.15	255.22
				118	276.2	5.81	19.85	255.22
				119	299.8	5.19	19.85	245.18
				120	312.1	6.76	ErrBox	ErrBox
				121	261.2	5.56	20.85	281.76
				122	1158.7	41.71	21.15	281.76
				123	224	5.3	21.15	295.24
				124	858.5	12.4	20.85	295.24
				125	699.3	10.68	20.85	281.76
				126	229	5.35	ErrBox	ErrBox
				127	242.2	4.34	21.85	252.17
				128	236.3	4.19	22.15	252.17
				129	839.9	12.97	22.15	262.43
				130	231.5	5.16	21.85	262.43
				131	255.2	4.42	21.85	252.17
				132	335.4	5.09	ErrBox	ErrBox
				133	261.9	4.84	22.85	245.39
				134	334.2	5.99	23.15	245.39
				135	258.1	4.59	23.15	252.81
				136	326.1	7	22.85	252.81
				137	256.5	4.61	22.85	245.39
				138	341	5.41	ErrBox	ErrBox
				139	276.7	5.32	23.85	308.47
				140	242.9	4.46	24.15	308.47
				141	254.1	4.55	24.15	318.93
				142	348.7	5.21	23.85	318.93
				143	257.4	5.48	23.85	308.47
				144	266.9	4.47	ErrBox	ErrBox
				145	361.9	5.82	24.85	254.59
				146	355.5	9.2	25.15	254.59
				147	1882.8	30.18	25.15	263.81
				148	252.9	4.31	24.85	263.81
				149	285.5	6.94	24.85	254.59
				150	253.2	6.09	ErrBox	ErrBox
				151	350.4	15.05	25.85	243.09
				152	259.5	4.46	26.15	243.09
				153	575	8.94	26.15	252.91
				154	519.4	10.75	25.85	252.91
				155	428.2	9.08	25.85	243.09
				156	251.2	4.29	ErrBox	ErrBox
				157	281.2	8.22	26.85	263.7
				158	255.4	4.09	27.15	263.7
				159	371.2	6.46	27.15	275.5
				160	319.9	7.14	26.85	275.5
				161	269.1	8.1	26.85	263.7
				162	333	5.19	ErrBox	ErrBox
				163	326.2	5.89	27.85	291.15
				164	258.2	6.7	28.15	291.15
				165	271.2	5.01	28.15	300.45
				166	249.2	4.26	27.85	300.45
				167	336	6.16	27.85	291.15
				168	244.1	3.81	ErrBox	ErrBox
				169	259.3	5.5	28.85	1631.64
				170	279	6.4	29.15	1631.64
				171	254.4	4.11	29.15	1694.56
				172	1160.5	53.43	28.85	1694.56
				173	312.9	7.34	28.85	1631.64
				174	245.6	4.95	ErrBox	ErrBox
				175	274.8	4.81	29.85	250.95
				176	309.7	6.66	30.15	250.95
				177	1068.7	30.2	30.15	257.45
				178	246.2	4.02	29.85	257.45
				179	307	4.83	29.85	250.95
				180	1217.5	49.2	ErrBox	ErrBox
				181	287.3	7.29	30.85	260.3
				182	253.2	5.79	31.15	260.3
				183	319.1	8.28	31.15	271.3
				184	313.8	6.11	30.85	271.3
				185	280.6	5.48	30.85	260.3
				186	352.6	8.16	ErrBox	ErrBox
				187	271.4	11.35	31.85	318.43
				188	266.9	5.37	32.15	318.43
				189	253.9	4.48	32.15	331.97
				190	259.2	6.78	31.85	331.97
				191	243.1	4.95	31.85	318.43
				192	259.2	4.91	ErrBox	ErrBox
				193	260.7	5.97	32.85	248.64
				194	255.8	5.49	33.15	248.64
				195	336.8	11	33.15	259.36
				196	262.7	4.87	32.85	259.36
				197	316.6	5.82	32.85	248.64
				198	1005.6	62.83	ErrBox	ErrBox
				199	260	4.59	33.85	269.14
				200	331.5	8.11	34.15	269.14
				201	271.8	5.78	34.15	281.06
				202	283.3	6.69	33.85	281.06
				203	1181	54.25	33.85	269.14
				204	259.3	7.07	ErrBox	ErrBox
				205	300.2	8.01	34.85	317
				206	260.5	5.85	35.15	317
				207	258.4	9.43	35.15	330.6
				208	247.6	3.99	34.85	330.6
				209	282.3	7.72	34.85	317
				210	266.4	6.16	ErrBox	ErrBox
				211	258.5	6.01	35.85	338.27
				212	244.5	4.13	36.15	338.27
				213	275.5	6.35	36.15	355.93
				214	257	4.42	35.85	355.93
				215	302.1	6.13	35.85	338.27
				216	256.1	5.19	ErrBox	ErrBox
				217	336.9	7.35	36.85	235.22
				218	246.7	6.49	37.15	235.22
				219	251.1	4.64	37.15	245.78
				220	1831.8	34.89	36.85	245.78
				221	247.6	4.28	36.85	235.22
				222	282.7	6.4	ErrBox	ErrBox
				223	255.8	5.62	37.85	293.92
				224	1480.8	45.73	38.15	293.92
				225	310.3	4.93	38.15	300.88
				226	252.1	4.58	37.85	300.88
				227	255.3	6.97	37.85	293.92
				228	354.5	8.76	ErrBox	ErrBox
				229	325.3	6.72	38.85	272.16
				230	341	5.67	39.15	272.16
				231	243.2	4.43	39.15	279.64
				232	1256.8	37.21	38.85	279.64
				233	273.4	7.95	38.85	272.16
				234	257.8	4.43	ErrBox	ErrBox
				235	250.8	5.67	39.85	234.64
				236	307	6.91	40.15	234.64
				237	321.1	6.39	40.15	244.56
				238	311.9	6.53	39.85	244.56
				239	309.3	5.82	39.85	234.64
				240	312.2	6.78	ErrBox	ErrBox
				241	298.2	5.21	40.85	291
				242	620.5	9.55	41.15	291
				243	425.9	7.21	41.15	305.8
				244	307.2	6.4	40.85	305.8
				245	1958.4	23.24	40.85	291
				246	324.2	6.67	ErrBox	ErrBox
				247	311.7	4.94	41.85	254.12
				248	348.2	7.34	42.15	254.12
				249	1135.4	49.52	42.15	260.88
				250	341.7	5.84	41.85	260.88
				251	296.9	7.26	41.85	254.12
				252	287.5	7.79	ErrBox	ErrBox
				253	347.9	9.46	42.85	247.39
				254	334.4	6.84	43.15	247.39
				255	309.4	6.66	43.15	255.21
				256	297.1	6.24	42.85	255.21
				257	1279.5	58.52	42.85	247.39
				258	332.5	6.86	ErrBox	ErrBox
				259	338.2	9.09	43.85	231.62
				260	302.4	7.69	44.15	231.62
				261	313.4	7.38	44.15	246.78
				262	310.1	5.75	43.85	246.78
				263	306.2	6.98	43.85	231.62
				264	307.6	6.36	ErrBox	ErrBox
				265	292.8	8.81	44.85	247.4
				266	1835.5	21.11	45.15	247.4
				267	299.2	7.75	45.15	257.6
				268	425.7	12.07	44.85	257.6
				269	351.5	8.49	44.85	247.4
				270	385.1	6.24	ErrBox	ErrBox
				271	292.8	5.47	45.85	296.84
				272	297.1	6.68	46.15	296.84
				273	1771.3	34.77	46.15	304.36
				274	274	6.56	45.85	304.36
				275	297.4	7.81	45.85	296.84
				276	314.4	8.94	ErrBox	ErrBox
				277	371.7	8.09	46.85	241.98
				278	314	6.69	47.15	241.98
				279	298	5.76	47.15	250.82
				280	598.6	14.29	46.85	250.82
				281	302.6	5.47	46.85	241.98
				282	321.6	12.62	ErrBox	ErrBox
				283	297.7	6.91	47.85	242.68
				284	359.7	12.45	48.15	242.68
				285	323.6	5.09	48.15	253.72
				286	307.6	7.11	47.85	253.72
				287	305.4	6.63	47.85	242.68
				288	286.2	9.11	ErrBox	ErrBox
				289	294.6	9.78	48.85	248.57
				290	291.7	8.4	49.15	248.57
				291	275.9	8.86	49.15	260.03
				292	281	10.17	48.85	260.03
				293	596.9	15.52	48.85	248.57
				294	505.9	8.69	ErrBox	ErrBox
				295	285.2	6.46	49.85	263.63
				296	316.3	8.67	50.15	263.63
				297	298.8	7.29	50.15	272.37
				298	1850.5	26.17	49.85	272.37
				299	347	5.71	49.85	263.63
				300	350.9	8.93	ErrBox	ErrBox
				301	274.1	12.42	50.85	246.4
				302	294.8	10.27	51.15	246.4
				303	306.6	7.73	51.15	255.8
				304	300	5.72	50.85	255.8
				305	300.1	6.18	50.85	246.4
				306	296.8	5.71	ErrBox	ErrBox
				307	317.1	8.11	51.85	245.35
				308	319.7	8.03	52.15	245.35
				309	327.7	11.57	52.15	254.05
				310	359.1	6.88	51.85	254.05
				311	333.9	6.3	51.85	245.35
				312	291.2	5.95	ErrBox	ErrBox
				313	350.2	7.1	52.85	255.29
				314	2004.9	24.52	53.15	255.29
				315	2470.6	17.82	53.15	262.71
				316	592.6	11.85	52.85	262.71
				317	306.4	6.64	52.85	255.29
				318	323.5	9.09	ErrBox	ErrBox
				319	307.7	6.65	53.85	238.08
				320	290.5	7.28	54.15	238.08
				321	279.5	6.06	54.15	248.32
				322	332.1	6.57	53.85	248.32
				323	301.4	6.16	53.85	238.08
				324	1383	67.92	ErrBox	ErrBox
				325	338.3	5.6	54.85	262
				326	327.8	6.33	55.15	262
				327	326.2	5.78	55.15	269
				328	310.1	4.92	54.85	269
				329	314.7	6.38	54.85	262
				330	951.6	13.41	ErrBox	ErrBox
				331	2132.1	25	55.85	247.7
				332	354	6.7	56.15	247.7
				333	2664	24.24	56.15	257.5
				334	372.4	8.17	55.85	257.5
				335	586.5	11.44	55.85	247.7
				336	380.9	9.18	ErrBox	ErrBox
				337	332.2	5.7	56.85	263.81
				338	318.9	5.66	57.15	263.81
				339	307.9	5	57.15	272.99
				340	333.8	5.44	56.85	272.99
				341	596.8	10.72	56.85	263.81
				342	1601.4	26.68	ErrBox	ErrBox
				343	903.8	12.81	57.85	254.46
				344	261	9.85	58.15	254.46
				345	327.4	5.14	58.15	262.74
				346	348.5	6.74	57.85	262.74
				347	343.5	6.74	57.85	254.46
				348	353.5	6.24	ErrBox	ErrBox
				349	316.8	5.53	58.85	268.71
				350	314.5	5.12	59.15	268.71
				351	249.9	5.19	59.15	276.69
				352	340.5	6.62	58.85	276.69
				353	321.2	5.1	58.85	268.71
				354	327	5.98	ErrBox	ErrBox
				355	316.7	6.43	59.85	254.98
				356	1201.7	56.65	60.15	254.98
				357	1680.8	22.45	60.15	266.02
				358	405	7.41	59.85	266.02
				359	306.7	6.82	59.85	254.98
				360	312.3	5.02	ErrBox	ErrBox
				361	300.1	6.06	60.85	255.14
				362	1865.5	21.55	61.15	255.14
				363	919.5	17.43	61.15	265.46
				364	290.4	5.16	60.85	265.46
				365	304.8	5.1	60.85	255.14
				366	320.2	6.19	ErrBox	ErrBox
				367	418	8.45	61.85	262.06
				368	381.6	6.21	62.15	262.06
				369	332.4	5.45	62.15	270.54
				370	315.4	5.25	61.85	270.54
				371	330.7	5.27	61.85	262.06
				372	1759.2	22.92	ErrBox	ErrBox
				373	378.9	9.01	62.85	250.42
				374	328.5	5.89	63.15	250.42
				375	311.8	6.23	63.15	262.78
				376	962.6	15.46	62.85	262.78
				377	341.3	5.77	62.85	250.42
				378	308.5	6.02	ErrBox	ErrBox
				379	537.9	8.37	63.85	296.58
				380	450.4	7.81	64.15	296.58
				381	361.1	13.22	64.15	305.82
				382	288.7	7.96	63.85	305.82
				383	325.3	5.22	63.85	296.58
				384	302.4	6.27	ErrBox	ErrBox
				385	268.5	5.33	64.85	255.17
				386	344.3	5.83	65.15	255.17
				387	284.3	5.33	65.15	264.03
				388	327.7	5.91	64.85	264.03
				389	334.2	5.22	64.85	255.17
				390	323.7	5.72	ErrBox	ErrBox
				391	353.8	6.67	65.85	232.48
				392	366.6	5.61	66.15	232.48
				393	1621.5	23.31	66.15	245.52
				394	268.3	7.4	65.85	245.52
				395	596	10.75	65.85	232.48
				396	396.8	6.71	ErrBox	ErrBox
				397	345.8	6.39	66.85	277.55
				398	327.5	5.42	67.15	277.55
				399	348.2	5.73	67.15	290.65
				400	319.7	5.41	66.85	290.65
				401	346.6	5.52	66.85	277.55
				402	344	5.51	ErrBox	ErrBox
				403	322.2	5.15	67.85	256.85
				404	343.9	5.76	68.15	256.85
				405	1707.6	20.85	68.15	266.75
				406	317	5.68	67.85	266.75
				407	350.7	5.53	67.85	256.85
				408	331.8	5.27	ErrBox	ErrBox
				409	426	6.79	68.85	263.97
				410	427.8	7.63	69.15	263.97
				411	333.7	5.65	69.15	277.23
				412	659.4	10.36	68.85	277.23
				413	356.6	6.16	68.85	263.97
				414	293.4	5.12	ErrBox	ErrBox
				415	328.3	5.22	69.85	256.31
				416	338.7	8.89	70.15	256.31
				417	333	6.23	70.15	265.89
				418	341.7	5.45	69.85	265.89
				419	241.7	4.31	69.85	256.31
				420	243.9	4.16	ErrBox	ErrBox
				421	683.5	10.77	70.85	262.8
				422	1206.8	28.66	71.15	262.8
				423	241.3	3.88	71.15	270.2
				424	255.4	7.14	70.85	270.2
				425	270.5	6.33	70.85	262.8
				426	1817.3	21.34	ErrBox	ErrBox
				427	958.1	14.15	71.85	234.62
				428	388.9	6.56	72.15	234.62
				429	296.4	4.55	72.15	248.98
				430	936.1	13.53	71.85	248.98
				431	353.3	5.87	71.85	234.62
				432	278.3	5.11	ErrBox	ErrBox
				433	403.7	7.97	72.85	251.12
				434	1833.8	26.25	73.15	251.12
				435	239.4	5.86	73.15	259.88
				436	257.4	5.67	72.85	259.88
				437	295.5	4.65	72.85	251.12
				438	310.6	5.1	ErrBox	ErrBox
				439	289.7	6.25	73.85	238.6
				440	241.7	5	74.15	238.6
				441	244.8	4.24	74.15	247.2
				442	269.4	5.07	73.85	247.2
				443	294.1	6.48	73.85	238.6
				444	320.6	6.57	ErrBox	ErrBox
				445	319.6	5.6	74.85	255.93
				446	292.9	6.31	75.15	255.93
				447	586.5	8.51	75.15	266.27
				448	293.2	6.19	74.85	266.27
				449	456.1	7.19	74.85	255.93
				450	870.3	14.79	ErrBox	ErrBox
				451	225.4	4.82	75.85	293.69
				452	287.3	6.4	76.15	293.69
				453	1608.6	28.44	76.15	300.91
				454	884.6	14.01	75.85	300.91
				455	291.1	6.17	75.85	293.69
				456	1262.4	26.09	ErrBox	ErrBox
				457	287.3	6.45	76.85	258.77
				458	240.3	4.98	77.15	258.77
				459	258.6	5.32	77.15	267.63
				460	255.7	4.88	76.85	267.63
				461	396.4	6.62	76.85	258.77
				462	2218.4	23.72	ErrBox	ErrBox
				463	258	5.79	77.85	256.1
				464	262	5.86	78.15	256.1
				465	312.1	5	78.15	264.7
				466	291.6	6.18	77.85	264.7
				467	321	5.63	77.85	256.1
				468	330.6	6.04	ErrBox	ErrBox
				469	3205.3	16.98	78.85	256.73
				470	239.3	7.2	79.15	256.73
				471	231.6	4.09	79.15	265.67
				472	1165.6	60.16	78.85	265.67
				473	258.5	5.09	78.85	256.73
				474	290.5	5.49	ErrBox	ErrBox
				475	318	5.47	79.85	244.42
				476	297.9	5.26	80.15	244.42
				477	233.7	4.14	80.15	253.58
				IsoLine	IsoLine	IsoLine	79.85	253.58
							79.85	244.42
							ErrBox	ErrBox
							80.85	250.59
							81.15	250.59
							81.15	260.81
							80.85	260.81
							80.85	250.59
							ErrBox	ErrBox
							81.85	294.25
							82.15	294.25
							82.15	306.35
							81.85	306.35
							81.85	294.25
							ErrBox	ErrBox
							82.85	223.46
							83.15	223.46
							83.15	233.74
							82.85	233.74
							82.85	223.46
							ErrBox	ErrBox
							83.85	402.41
							84.15	402.41
							84.15	412.79
							83.85	412.79
							83.85	402.41
							ErrBox	ErrBox
							84.85	231.35
							85.15	231.35
							85.15	241.25
							84.85	241.25
							84.85	231.35
							ErrBox	ErrBox
							85.85	236.91
							86.15	236.91
							86.15	245.09
							85.85	245.09
							85.85	236.91
							ErrBox	ErrBox
							86.85	256.9
							87.15	256.9
							87.15	269.1
							86.85	269.1
							86.85	256.9
							ErrBox	ErrBox
							87.85	281.35
							88.15	281.35
							88.15	299.45
							87.85	299.45
							87.85	281.35
							ErrBox	ErrBox
							88.85	330.31
							89.15	330.31
							89.15	340.49
							88.85	340.49
							88.85	330.31
							ErrBox	ErrBox
							89.85	232.31
							90.15	232.31
							90.15	242.69
							89.85	242.69
							89.85	232.31
							ErrBox	ErrBox
							90.85	288.16
							91.15	288.16
							91.15	298.24
							90.85	298.24
							90.85	288.16
							ErrBox	ErrBox
							91.85	891.34
							92.15	891.34
							92.15	917.06
							91.85	917.06
							91.85	891.34
							ErrBox	ErrBox
							92.85	293.7
							93.15	293.7
							93.15	304.5
							92.85	304.5
							92.85	293.7
							ErrBox	ErrBox
							93.85	233.62
							94.15	233.62
							94.15	243.18
							93.85	243.18
							93.85	233.62
							ErrBox	ErrBox
							94.85	382.25
							95.15	382.25
							95.15	394.75
							94.85	394.75
							94.85	382.25
							ErrBox	ErrBox
							95.85	860.76
							96.15	860.76
							96.15	875.24
							95.85	875.24
							95.85	860.76
							ErrBox	ErrBox
							96.85	317.92
							97.15	317.92
							97.15	332.88
							96.85	332.88
							96.85	317.92
							ErrBox	ErrBox
							97.85	241.89
							98.15	241.89
							98.15	253.51
							97.85	253.51
							97.85	241.89
							ErrBox	ErrBox
							98.85	248.51
							99.15	248.51
							99.15	257.49
							98.85	257.49
							98.85	248.51
							ErrBox	ErrBox
							99.85	231.34
							100.15	231.34
							100.15	240.86
							99.85	240.86
							99.85	231.34
							ErrBox	ErrBox
							100.85	245.47
							101.15	245.47
							101.15	258.53
							100.85	258.53
							100.85	245.47
							ErrBox	ErrBox
							101.85	286.72
							102.15	286.72
							102.15	297.88
							101.85	297.88
							101.85	286.72
							ErrBox	ErrBox
							102.85	341.25
							103.15	341.25
							103.15	354.15
							102.85	354.15
							102.85	341.25
							ErrBox	ErrBox
							103.85	478.81
							104.15	478.81
							104.15	492.79
							103.85	492.79
							103.85	478.81
							ErrBox	ErrBox
							104.85	285.67
							105.15	285.67
							105.15	293.93
							104.85	293.93
							104.85	285.67
							ErrBox	ErrBox
							105.85	1482.18
							106.15	1482.18
							106.15	1530.62
							105.85	1530.62
							105.85	1482.18
							ErrBox	ErrBox
							106.85	333.29
							107.15	333.29
							107.15	342.51
							106.85	342.51
							106.85	333.29
							ErrBox	ErrBox
							107.85	289.94
							108.15	289.94
							108.15	299.26
							107.85	299.26
							107.85	289.94
							ErrBox	ErrBox
							108.85	250.8
							109.15	250.8
							109.15	262
							108.85	262
							108.85	250.8
							ErrBox	ErrBox
							109.85	252.57
							110.15	252.57
							110.15	260.43
							109.85	260.43
							109.85	252.57
							ErrBox	ErrBox
							110.85	325.85
							111.15	325.85
							111.15	338.35
							110.85	338.35
							110.85	325.85
							ErrBox	ErrBox
							111.85	320.85
							112.15	320.85
							112.15	336.95
							111.85	336.95
							111.85	320.85
							ErrBox	ErrBox
							112.85	236.15
							113.15	236.15
							113.15	246.25
							112.85	246.25
							112.85	236.15
							ErrBox	ErrBox
							113.85	290.35
							114.15	290.35
							114.15	300.05
							113.85	300.05
							113.85	290.35
							ErrBox	ErrBox
							114.85	293.46
							115.15	293.46
							115.15	309.34
							114.85	309.34
							114.85	293.46
							ErrBox	ErrBox
							115.85	323.04
							116.15	323.04
							116.15	335.36
							115.85	335.36
							115.85	323.04
							ErrBox	ErrBox
							116.85	295.78
							117.15	295.78
							117.15	303.22
							116.85	303.22
							116.85	295.78
							ErrBox	ErrBox
							117.85	270.39
							118.15	270.39
							118.15	282.01
							117.85	282.01
							117.85	270.39
							ErrBox	ErrBox
							118.85	294.61
							119.15	294.61
							119.15	304.99
							118.85	304.99
							118.85	294.61
							ErrBox	ErrBox
							119.85	305.34
							120.15	305.34
							120.15	318.86
							119.85	318.86
							119.85	305.34
							ErrBox	ErrBox
							120.85	255.64
							121.15	255.64
							121.15	266.76
							120.85	266.76
							120.85	255.64
							ErrBox	ErrBox
							121.85	1116.99
							122.15	1116.99
							122.15	1200.41
							121.85	1200.41
							121.85	1116.99
							ErrBox	ErrBox
							122.85	218.7
							123.15	218.7
							123.15	229.3
							122.85	229.3
							122.85	218.7
							ErrBox	ErrBox
							123.85	846.1
							124.15	846.1
							124.15	870.9
							123.85	870.9
							123.85	846.1
							ErrBox	ErrBox
							124.85	688.62
							125.15	688.62
							125.15	709.98
							124.85	709.98
							124.85	688.62
							ErrBox	ErrBox
							125.85	223.65
							126.15	223.65
							126.15	234.35
							125.85	234.35
							125.85	223.65
							ErrBox	ErrBox
							126.85	237.86
							127.15	237.86
							127.15	246.54
							126.85	246.54
							126.85	237.86
							ErrBox	ErrBox
							127.85	232.11
							128.15	232.11
							128.15	240.49
							127.85	240.49
							127.85	232.11
							ErrBox	ErrBox
							128.85	826.93
							129.15	826.93
							129.15	852.87
							128.85	852.87
							128.85	826.93
							ErrBox	ErrBox
							129.85	226.34
							130.15	226.34
							130.15	236.66
							129.85	236.66
							129.85	226.34
							ErrBox	ErrBox
							130.85	250.78
							131.15	250.78
							131.15	259.62
							130.85	259.62
							130.85	250.78
							ErrBox	ErrBox
							131.85	330.31
							132.15	330.31
							132.15	340.49
							131.85	340.49
							131.85	330.31
							ErrBox	ErrBox
							132.85	257.06
							133.15	257.06
							133.15	266.74
							132.85	266.74
							132.85	257.06
							ErrBox	ErrBox
							133.85	328.21
							134.15	328.21
							134.15	340.19
							133.85	340.19
							133.85	328.21
							ErrBox	ErrBox
							134.85	253.51
							135.15	253.51
							135.15	262.69
							134.85	262.69
							134.85	253.51
							ErrBox	ErrBox
							135.85	319.1
							136.15	319.1
							136.15	333.1
							135.85	333.1
							135.85	319.1
							ErrBox	ErrBox
							136.85	251.89
							137.15	251.89
							137.15	261.11
							136.85	261.11
							136.85	251.89
							ErrBox	ErrBox
							137.85	335.59
							138.15	335.59
							138.15	346.41
							137.85	346.41
							137.85	335.59
							ErrBox	ErrBox
							138.85	271.38
							139.15	271.38
							139.15	282.02
							138.85	282.02
							138.85	271.38
							ErrBox	ErrBox
							139.85	238.44
							140.15	238.44
							140.15	247.36
							139.85	247.36
							139.85	238.44
							ErrBox	ErrBox
							140.85	249.55
							141.15	249.55
							141.15	258.65
							140.85	258.65
							140.85	249.55
							ErrBox	ErrBox
							141.85	343.49
							142.15	343.49
							142.15	353.91
							141.85	353.91
							141.85	343.49
							ErrBox	ErrBox
							142.85	251.92
							143.15	251.92
							143.15	262.88
							142.85	262.88
							142.85	251.92
							ErrBox	ErrBox
							143.85	262.43
							144.15	262.43
							144.15	271.37
							143.85	271.37
							143.85	262.43
							ErrBox	ErrBox
							144.85	356.08
							145.15	356.08
							145.15	367.72
							144.85	367.72
							144.85	356.08
							ErrBox	ErrBox
							145.85	346.3
							146.15	346.3
							146.15	364.7
							145.85	364.7
							145.85	346.3
							ErrBox	ErrBox
							146.85	1852.62
							147.15	1852.62
							147.15	1912.98
							146.85	1912.98
							146.85	1852.62
							ErrBox	ErrBox
							147.85	248.59
							148.15	248.59
							148.15	257.21
							147.85	257.21
							147.85	248.59
							ErrBox	ErrBox
							148.85	278.56
							149.15	278.56
							149.15	292.44
							148.85	292.44
							148.85	278.56
							ErrBox	ErrBox
							149.85	247.11
							150.15	247.11
							150.15	259.29
							149.85	259.29
							149.85	247.11
							ErrBox	ErrBox
							150.85	335.35
							151.15	335.35
							151.15	365.45
							150.85	365.45
							150.85	335.35
							ErrBox	ErrBox
							151.85	255.04
							152.15	255.04
							152.15	263.96
							151.85	263.96
							151.85	255.04
							ErrBox	ErrBox
							152.85	566.06
							153.15	566.06
							153.15	583.94
							152.85	583.94
							152.85	566.06
							ErrBox	ErrBox
							153.85	508.65
							154.15	508.65
							154.15	530.15
							153.85	530.15
							153.85	508.65
							ErrBox	ErrBox
							154.85	419.12
							155.15	419.12
							155.15	437.28
							154.85	437.28
							154.85	419.12
							ErrBox	ErrBox
							155.85	246.91
							156.15	246.91
							156.15	255.49
							155.85	255.49
							155.85	246.91
							ErrBox	ErrBox
							156.85	272.98
							157.15	272.98
							157.15	289.42
							156.85	289.42
							156.85	272.98
							ErrBox	ErrBox
							157.85	251.31
							158.15	251.31
							158.15	259.49
							157.85	259.49
							157.85	251.31
							ErrBox	ErrBox
							158.85	364.74
							159.15	364.74
							159.15	377.66
							158.85	377.66
							158.85	364.74
							ErrBox	ErrBox
							159.85	312.76
							160.15	312.76
							160.15	327.04
							159.85	327.04
							159.85	312.76
							ErrBox	ErrBox
							160.85	261
							161.15	261
							161.15	277.2
							160.85	277.2
							160.85	261
							ErrBox	ErrBox
							161.85	327.81
							162.15	327.81
							162.15	338.19
							161.85	338.19
							161.85	327.81
							ErrBox	ErrBox
							162.85	320.31
							163.15	320.31
							163.15	332.09
							162.85	332.09
							162.85	320.31
							ErrBox	ErrBox
							163.85	251.5
							164.15	251.5
							164.15	264.9
							163.85	264.9
							163.85	251.5
							ErrBox	ErrBox
							164.85	266.19
							165.15	266.19
							165.15	276.21
							164.85	276.21
							164.85	266.19
							ErrBox	ErrBox
							165.85	244.94
							166.15	244.94
							166.15	253.46
							165.85	253.46
							165.85	244.94
							ErrBox	ErrBox
							166.85	329.84
							167.15	329.84
							167.15	342.16
							166.85	342.16
							166.85	329.84
							ErrBox	ErrBox
							167.85	240.29
							168.15	240.29
							168.15	247.91
							167.85	247.91
							167.85	240.29
							ErrBox	ErrBox
							168.85	253.8
							169.15	253.8
							169.15	264.8
							168.85	264.8
							168.85	253.8
							ErrBox	ErrBox
							169.85	272.6
							170.15	272.6
							170.15	285.4
							169.85	285.4
							169.85	272.6
							ErrBox	ErrBox
							170.85	250.29
							171.15	250.29
							171.15	258.51
							170.85	258.51
							170.85	250.29
							ErrBox	ErrBox
							171.85	1107.07
							172.15	1107.07
							172.15	1213.93
							171.85	1213.93
							171.85	1107.07
							ErrBox	ErrBox
							172.85	305.56
							173.15	305.56
							173.15	320.24
							172.85	320.24
							172.85	305.56
							ErrBox	ErrBox
							173.85	240.65
							174.15	240.65
							174.15	250.55
							173.85	250.55
							173.85	240.65
							ErrBox	ErrBox
							174.85	269.99
							175.15	269.99
							175.15	279.61
							174.85	279.61
							174.85	269.99
							ErrBox	ErrBox
							175.85	303.04
							176.15	303.04
							176.15	316.36
							175.85	316.36
							175.85	303.04
							ErrBox	ErrBox
							176.85	1038.5
							177.15	1038.5
							177.15	1098.9
							176.85	1098.9
							176.85	1038.5
							ErrBox	ErrBox
							177.85	242.18
							178.15	242.18
							178.15	250.22
							177.85	250.22
							177.85	242.18
							ErrBox	ErrBox
							178.85	302.17
							179.15	302.17
							179.15	311.83
							178.85	311.83
							178.85	302.17
							ErrBox	ErrBox
							179.85	1168.3
							180.15	1168.3
							180.15	1266.7
							179.85	1266.7
							179.85	1168.3
							ErrBox	ErrBox
							180.85	280.01
							181.15	280.01
							181.15	294.59
							180.85	294.59
							180.85	280.01
							ErrBox	ErrBox
							181.85	247.41
							182.15	247.41
							182.15	258.99
							181.85	258.99
							181.85	247.41
							ErrBox	ErrBox
							182.85	310.82
							183.15	310.82
							183.15	327.38
							182.85	327.38
							182.85	310.82
							ErrBox	ErrBox
							183.85	307.69
							184.15	307.69
							184.15	319.91
							183.85	319.91
							183.85	307.69
							ErrBox	ErrBox
							184.85	275.12
							185.15	275.12
							185.15	286.08
							184.85	286.08
							184.85	275.12
							ErrBox	ErrBox
							185.85	344.44
							186.15	344.44
							186.15	360.76
							185.85	360.76
							185.85	344.44
							ErrBox	ErrBox
							186.85	260.05
							187.15	260.05
							187.15	282.75
							186.85	282.75
							186.85	260.05
							ErrBox	ErrBox
							187.85	261.53
							188.15	261.53
							188.15	272.27
							187.85	272.27
							187.85	261.53
							ErrBox	ErrBox
							188.85	249.42
							189.15	249.42
							189.15	258.38
							188.85	258.38
							188.85	249.42
							ErrBox	ErrBox
							189.85	252.42
							190.15	252.42
							190.15	265.98
							189.85	265.98
							189.85	252.42
							ErrBox	ErrBox
							190.85	238.15
							191.15	238.15
							191.15	248.05
							190.85	248.05
							190.85	238.15
							ErrBox	ErrBox
							191.85	254.29
							192.15	254.29
							192.15	264.11
							191.85	264.11
							191.85	254.29
							ErrBox	ErrBox
							192.85	254.73
							193.15	254.73
							193.15	266.67
							192.85	266.67
							192.85	254.73
							ErrBox	ErrBox
							193.85	250.31
							194.15	250.31
							194.15	261.29
							193.85	261.29
							193.85	250.31
							ErrBox	ErrBox
							194.85	325.8
							195.15	325.8
							195.15	347.8
							194.85	347.8
							194.85	325.8
							ErrBox	ErrBox
							195.85	257.83
							196.15	257.83
							196.15	267.57
							195.85	267.57
							195.85	257.83
							ErrBox	ErrBox
							196.85	310.78
							197.15	310.78
							197.15	322.42
							196.85	322.42
							196.85	310.78
							ErrBox	ErrBox
							197.85	942.77
							198.15	942.77
							198.15	1068.43
							197.85	1068.43
							197.85	942.77
							ErrBox	ErrBox
							198.85	255.41
							199.15	255.41
							199.15	264.59
							198.85	264.59
							198.85	255.41
							ErrBox	ErrBox
							199.85	323.39
							200.15	323.39
							200.15	339.61
							199.85	339.61
							199.85	323.39
							ErrBox	ErrBox
							200.85	266.02
							201.15	266.02
							201.15	277.58
							200.85	277.58
							200.85	266.02
							ErrBox	ErrBox
							201.85	276.61
							202.15	276.61
							202.15	289.99
							201.85	289.99
							201.85	276.61
							ErrBox	ErrBox
							202.85	1126.75
							203.15	1126.75
							203.15	1235.25
							202.85	1235.25
							202.85	1126.75
							ErrBox	ErrBox
							203.85	252.23
							204.15	252.23
							204.15	266.37
							203.85	266.37
							203.85	252.23
							ErrBox	ErrBox
							204.85	292.19
							205.15	292.19
							205.15	308.21
							204.85	308.21
							204.85	292.19
							ErrBox	ErrBox
							205.85	254.65
							206.15	254.65
							206.15	266.35
							205.85	266.35
							205.85	254.65
							ErrBox	ErrBox
							206.85	248.97
							207.15	248.97
							207.15	267.83
							206.85	267.83
							206.85	248.97
							ErrBox	ErrBox
							207.85	243.61
							208.15	243.61
							208.15	251.59
							207.85	251.59
							207.85	243.61
							ErrBox	ErrBox
							208.85	274.58
							209.15	274.58
							209.15	290.02
							208.85	290.02
							208.85	274.58
							ErrBox	ErrBox
							209.85	260.24
							210.15	260.24
							210.15	272.56
							209.85	272.56
							209.85	260.24
							ErrBox	ErrBox
							210.85	252.49
							211.15	252.49
							211.15	264.51
							210.85	264.51
							210.85	252.49
							ErrBox	ErrBox
							211.85	240.37
							212.15	240.37
							212.15	248.63
							211.85	248.63
							211.85	240.37
							ErrBox	ErrBox
							212.85	269.15
							213.15	269.15
							213.15	281.85
							212.85	281.85
							212.85	269.15
							ErrBox	ErrBox
							213.85	252.58
							214.15	252.58
							214.15	261.42
							213.85	261.42
							213.85	252.58
							ErrBox	ErrBox
							214.85	295.97
							215.15	295.97
							215.15	308.23
							214.85	308.23
							214.85	295.97
							ErrBox	ErrBox
							215.85	250.91
							216.15	250.91
							216.15	261.29
							215.85	261.29
							215.85	250.91
							ErrBox	ErrBox
							216.85	329.55
							217.15	329.55
							217.15	344.25
							216.85	344.25
							216.85	329.55
							ErrBox	ErrBox
							217.85	240.21
							218.15	240.21
							218.15	253.19
							217.85	253.19
							217.85	240.21
							ErrBox	ErrBox
							218.85	246.46
							219.15	246.46
							219.15	255.74
							218.85	255.74
							218.85	246.46
							ErrBox	ErrBox
							219.85	1796.91
							220.15	1796.91
							220.15	1866.69
							219.85	1866.69
							219.85	1796.91
							ErrBox	ErrBox
							220.85	243.32
							221.15	243.32
							221.15	251.88
							220.85	251.88
							220.85	243.32
							ErrBox	ErrBox
							221.85	276.3
							222.15	276.3
							222.15	289.1
							221.85	289.1
							221.85	276.3
							ErrBox	ErrBox
							222.85	250.18
							223.15	250.18
							223.15	261.42
							222.85	261.42
							222.85	250.18
							ErrBox	ErrBox
							223.85	1435.07
							224.15	1435.07
							224.15	1526.53
							223.85	1526.53
							223.85	1435.07
							ErrBox	ErrBox
							224.85	305.37
							225.15	305.37
							225.15	315.23
							224.85	315.23
							224.85	305.37
							ErrBox	ErrBox
							225.85	247.52
							226.15	247.52
							226.15	256.68
							225.85	256.68
							225.85	247.52
							ErrBox	ErrBox
							226.85	248.33
							227.15	248.33
							227.15	262.27
							226.85	262.27
							226.85	248.33
							ErrBox	ErrBox
							227.85	345.74
							228.15	345.74
							228.15	363.26
							227.85	363.26
							227.85	345.74
							ErrBox	ErrBox
							228.85	318.58
							229.15	318.58
							229.15	332.02
							228.85	332.02
							228.85	318.58
							ErrBox	ErrBox
							229.85	335.33
							230.15	335.33
							230.15	346.67
							229.85	346.67
							229.85	335.33
							ErrBox	ErrBox
							230.85	238.77
							231.15	238.77
							231.15	247.63
							230.85	247.63
							230.85	238.77
							ErrBox	ErrBox
							231.85	1219.59
							232.15	1219.59
							232.15	1294.01
							231.85	1294.01
							231.85	1219.59
							ErrBox	ErrBox
							232.85	265.45
							233.15	265.45
							233.15	281.35
							232.85	281.35
							232.85	265.45
							ErrBox	ErrBox
							233.85	253.37
							234.15	253.37
							234.15	262.23
							233.85	262.23
							233.85	253.37
							ErrBox	ErrBox
							234.85	245.13
							235.15	245.13
							235.15	256.47
							234.85	256.47
							234.85	245.13
							ErrBox	ErrBox
							235.85	300.09
							236.15	300.09
							236.15	313.91
							235.85	313.91
							235.85	300.09
							ErrBox	ErrBox
							236.85	314.71
							237.15	314.71
							237.15	327.49
							236.85	327.49
							236.85	314.71
							ErrBox	ErrBox
							237.85	305.37
							238.15	305.37
							238.15	318.43
							237.85	318.43
							237.85	305.37
							ErrBox	ErrBox
							238.85	303.48
							239.15	303.48
							239.15	315.12
							238.85	315.12
							238.85	303.48
							ErrBox	ErrBox
							239.85	305.42
							240.15	305.42
							240.15	318.98
							239.85	318.98
							239.85	305.42
							ErrBox	ErrBox
							240.85	292.99
							241.15	292.99
							241.15	303.41
							240.85	303.41
							240.85	292.99
							ErrBox	ErrBox
							241.85	610.95
							242.15	610.95
							242.15	630.05
							241.85	630.05
							241.85	610.95
							ErrBox	ErrBox
							242.85	418.69
							243.15	418.69
							243.15	433.11
							242.85	433.11
							242.85	418.69
							ErrBox	ErrBox
							243.85	300.8
							244.15	300.8
							244.15	313.6
							243.85	313.6
							243.85	300.8
							ErrBox	ErrBox
							244.85	1935.16
							245.15	1935.16
							245.15	1981.64
							244.85	1981.64
							244.85	1935.16
							ErrBox	ErrBox
							245.85	317.53
							246.15	317.53
							246.15	330.87
							245.85	330.87
							245.85	317.53
							ErrBox	ErrBox
							246.85	306.76
							247.15	306.76
							247.15	316.64
							246.85	316.64
							246.85	306.76
							ErrBox	ErrBox
							247.85	340.86
							248.15	340.86
							248.15	355.54
							247.85	355.54
							247.85	340.86
							ErrBox	ErrBox
							248.85	1085.88
							249.15	1085.88
							249.15	1184.92
							248.85	1184.92
							248.85	1085.88
							ErrBox	ErrBox
							249.85	335.86
							250.15	335.86
							250.15	347.54
							249.85	347.54
							249.85	335.86
							ErrBox	ErrBox
							250.85	289.64
							251.15	289.64
							251.15	304.16
							250.85	304.16
							250.85	289.64
							ErrBox	ErrBox
							251.85	279.71
							252.15	279.71
							252.15	295.29
							251.85	295.29
							251.85	279.71
							ErrBox	ErrBox
							252.85	338.44
							253.15	338.44
							253.15	357.36
							252.85	357.36
							252.85	338.44
							ErrBox	ErrBox
							253.85	327.56
							254.15	327.56
							254.15	341.24
							253.85	341.24
							253.85	327.56
							ErrBox	ErrBox
							254.85	302.74
							255.15	302.74
							255.15	316.06
							254.85	316.06
							254.85	302.74
							ErrBox	ErrBox
							255.85	290.86
							256.15	290.86
							256.15	303.34
							255.85	303.34
							255.85	290.86
							ErrBox	ErrBox
							256.85	1220.98
							257.15	1220.98
							257.15	1338.02
							256.85	1338.02
							256.85	1220.98
							ErrBox	ErrBox
							257.85	325.64
							258.15	325.64
							258.15	339.36
							257.85	339.36
							257.85	325.64
							ErrBox	ErrBox
							258.85	329.11
							259.15	329.11
							259.15	347.29
							258.85	347.29
							258.85	329.11
							ErrBox	ErrBox
							259.85	294.71
							260.15	294.71
							260.15	310.09
							259.85	310.09
							259.85	294.71
							ErrBox	ErrBox
							260.85	306.02
							261.15	306.02
							261.15	320.78
							260.85	320.78
							260.85	306.02
							ErrBox	ErrBox
							261.85	304.35
							262.15	304.35
							262.15	315.85
							261.85	315.85
							261.85	304.35
							ErrBox	ErrBox
							262.85	299.22
							263.15	299.22
							263.15	313.18
							262.85	313.18
							262.85	299.22
							ErrBox	ErrBox
							263.85	301.24
							264.15	301.24
							264.15	313.96
							263.85	313.96
							263.85	301.24
							ErrBox	ErrBox
							264.85	283.99
							265.15	283.99
							265.15	301.61
							264.85	301.61
							264.85	283.99
							ErrBox	ErrBox
							265.85	1814.39
							266.15	1814.39
							266.15	1856.61
							265.85	1856.61
							265.85	1814.39
							ErrBox	ErrBox
							266.85	291.45
							267.15	291.45
							267.15	306.95
							266.85	306.95
							266.85	291.45
							ErrBox	ErrBox
							267.85	413.63
							268.15	413.63
							268.15	437.77
							267.85	437.77
							267.85	413.63
							ErrBox	ErrBox
							268.85	343.01
							269.15	343.01
							269.15	359.99
							268.85	359.99
							268.85	343.01
							ErrBox	ErrBox
							269.85	378.86
							270.15	378.86
							270.15	391.34
							269.85	391.34
							269.85	378.86
							ErrBox	ErrBox
							270.85	287.33
							271.15	287.33
							271.15	298.27
							270.85	298.27
							270.85	287.33
							ErrBox	ErrBox
							271.85	290.42
							272.15	290.42
							272.15	303.78
							271.85	303.78
							271.85	290.42
							ErrBox	ErrBox
							272.85	1736.53
							273.15	1736.53
							273.15	1806.07
							272.85	1806.07
							272.85	1736.53
							ErrBox	ErrBox
							273.85	267.44
							274.15	267.44
							274.15	280.56
							273.85	280.56
							273.85	267.44
							ErrBox	ErrBox
							274.85	289.59
							275.15	289.59
							275.15	305.21
							274.85	305.21
							274.85	289.59
							ErrBox	ErrBox
							275.85	305.46
							276.15	305.46
							276.15	323.34
							275.85	323.34
							275.85	305.46
							ErrBox	ErrBox
							276.85	363.61
							277.15	363.61
							277.15	379.79
							276.85	379.79
							276.85	363.61
							ErrBox	ErrBox
							277.85	307.31
							278.15	307.31
							278.15	320.69
							277.85	320.69
							277.85	307.31
							ErrBox	ErrBox
							278.85	292.24
							279.15	292.24
							279.15	303.76
							278.85	303.76
							278.85	292.24
							ErrBox	ErrBox
							279.85	584.31
							280.15	584.31
							280.15	612.89
							279.85	612.89
							279.85	584.31
							ErrBox	ErrBox
							280.85	297.13
							281.15	297.13
							281.15	308.07
							280.85	308.07
							280.85	297.13
							ErrBox	ErrBox
							281.85	308.98
							282.15	308.98
							282.15	334.22
							281.85	334.22
							281.85	308.98
							ErrBox	ErrBox
							282.85	290.79
							283.15	290.79
							283.15	304.61
							282.85	304.61
							282.85	290.79
							ErrBox	ErrBox
							283.85	347.25
							284.15	347.25
							284.15	372.15
							283.85	372.15
							283.85	347.25
							ErrBox	ErrBox
							284.85	318.51
							285.15	318.51
							285.15	328.69
							284.85	328.69
							284.85	318.51
							ErrBox	ErrBox
							285.85	300.49
							286.15	300.49
							286.15	314.71
							285.85	314.71
							285.85	300.49
							ErrBox	ErrBox
							286.85	298.77
							287.15	298.77
							287.15	312.03
							286.85	312.03
							286.85	298.77
							ErrBox	ErrBox
							287.85	277.09
							288.15	277.09
							288.15	295.31
							287.85	295.31
							287.85	277.09
							ErrBox	ErrBox
							288.85	284.82
							289.15	284.82
							289.15	304.38
							288.85	304.38
							288.85	284.82
							ErrBox	ErrBox
							289.85	283.3
							290.15	283.3
							290.15	300.1
							289.85	300.1
							289.85	283.3
							ErrBox	ErrBox
							290.85	267.04
							291.15	267.04
							291.15	284.76
							290.85	284.76
							290.85	267.04
							ErrBox	ErrBox
							291.85	270.83
							292.15	270.83
							292.15	291.17
							291.85	291.17
							291.85	270.83
							ErrBox	ErrBox
							292.85	581.38
							293.15	581.38
							293.15	612.42
							292.85	612.42
							292.85	581.38
							ErrBox	ErrBox
							293.85	497.21
							294.15	497.21
							294.15	514.59
							293.85	514.59
							293.85	497.21
							ErrBox	ErrBox
							294.85	278.74
							295.15	278.74
							295.15	291.66
							294.85	291.66
							294.85	278.74
							ErrBox	ErrBox
							295.85	307.63
							296.15	307.63
							296.15	324.97
							295.85	324.97
							295.85	307.63
							ErrBox	ErrBox
							296.85	291.51
							297.15	291.51
							297.15	306.09
							296.85	306.09
							296.85	291.51
							ErrBox	ErrBox
							297.85	1824.33
							298.15	1824.33
							298.15	1876.67
							297.85	1876.67
							297.85	1824.33
							ErrBox	ErrBox
							298.85	341.29
							299.15	341.29
							299.15	352.71
							298.85	352.71
							298.85	341.29
							ErrBox	ErrBox
							299.85	341.97
							300.15	341.97
							300.15	359.83
							299.85	359.83
							299.85	341.97
							ErrBox	ErrBox
							300.85	261.68
							301.15	261.68
							301.15	286.52
							300.85	286.52
							300.85	261.68
							ErrBox	ErrBox
							301.85	284.53
							302.15	284.53
							302.15	305.07
							301.85	305.07
							301.85	284.53
							ErrBox	ErrBox
							302.85	298.87
							303.15	298.87
							303.15	314.33
							302.85	314.33
							302.85	298.87
							ErrBox	ErrBox
							303.85	294.28
							304.15	294.28
							304.15	305.72
							303.85	305.72
							303.85	294.28
							ErrBox	ErrBox
							304.85	293.92
							305.15	293.92
							305.15	306.28
							304.85	306.28
							304.85	293.92
							ErrBox	ErrBox
							305.85	291.09
							306.15	291.09
							306.15	302.51
							305.85	302.51
							305.85	291.09
							ErrBox	ErrBox
							306.85	308.99
							307.15	308.99
							307.15	325.21
							306.85	325.21
							306.85	308.99
							ErrBox	ErrBox
							307.85	311.67
							308.15	311.67
							308.15	327.73
							307.85	327.73
							307.85	311.67
							ErrBox	ErrBox
							308.85	316.13
							309.15	316.13
							309.15	339.27
							308.85	339.27
							308.85	316.13
							ErrBox	ErrBox
							309.85	352.22
							310.15	352.22
							310.15	365.98
							309.85	365.98
							309.85	352.22
							ErrBox	ErrBox
							310.85	327.6
							311.15	327.6
							311.15	340.2
							310.85	340.2
							310.85	327.6
							ErrBox	ErrBox
							311.85	285.25
							312.15	285.25
							312.15	297.15
							311.85	297.15
							311.85	285.25
							ErrBox	ErrBox
							312.85	343.1
							313.15	343.1
							313.15	357.3
							312.85	357.3
							312.85	343.1
							ErrBox	ErrBox
							313.85	1980.38
							314.15	1980.38
							314.15	2029.42
							313.85	2029.42
							313.85	1980.38
							ErrBox	ErrBox
							314.85	2452.78
							315.15	2452.78
							315.15	2488.42
							314.85	2488.42
							314.85	2452.78
							ErrBox	ErrBox
							315.85	580.75
							316.15	580.75
							316.15	604.45
							315.85	604.45
							315.85	580.75
							ErrBox	ErrBox
							316.85	299.76
							317.15	299.76
							317.15	313.04
							316.85	313.04
							316.85	299.76
							ErrBox	ErrBox
							317.85	314.41
							318.15	314.41
							318.15	332.59
							317.85	332.59
							317.85	314.41
							ErrBox	ErrBox
							318.85	301.05
							319.15	301.05
							319.15	314.35
							318.85	314.35
							318.85	301.05
							ErrBox	ErrBox
							319.85	283.22
							320.15	283.22
							320.15	297.78
							319.85	297.78
							319.85	283.22
							ErrBox	ErrBox
							320.85	273.44
							321.15	273.44
							321.15	285.56
							320.85	285.56
							320.85	273.44
							ErrBox	ErrBox
							321.85	325.53
							322.15	325.53
							322.15	338.67
							321.85	338.67
							321.85	325.53
							ErrBox	ErrBox
							322.85	295.24
							323.15	295.24
							323.15	307.56
							322.85	307.56
							322.85	295.24
							ErrBox	ErrBox
							323.85	1315.08
							324.15	1315.08
							324.15	1450.92
							323.85	1450.92
							323.85	1315.08
							ErrBox	ErrBox
							324.85	332.7
							325.15	332.7
							325.15	343.9
							324.85	343.9
							324.85	332.7
							ErrBox	ErrBox
							325.85	321.47
							326.15	321.47
							326.15	334.13
							325.85	334.13
							325.85	321.47
							ErrBox	ErrBox
							326.85	320.42
							327.15	320.42
							327.15	331.98
							326.85	331.98
							326.85	320.42
							ErrBox	ErrBox
							327.85	305.18
							328.15	305.18
							328.15	315.02
							327.85	315.02
							327.85	305.18
							ErrBox	ErrBox
							328.85	308.32
							329.15	308.32
							329.15	321.08
							328.85	321.08
							328.85	308.32
							ErrBox	ErrBox
							329.85	938.19
							330.15	938.19
							330.15	965.01
							329.85	965.01
							329.85	938.19
							ErrBox	ErrBox
							330.85	2107.1
							331.15	2107.1
							331.15	2157.1
							330.85	2157.1
							330.85	2107.1
							ErrBox	ErrBox
							331.85	347.3
							332.15	347.3
							332.15	360.7
							331.85	360.7
							331.85	347.3
							ErrBox	ErrBox
							332.85	2639.76
							333.15	2639.76
							333.15	2688.24
							332.85	2688.24
							332.85	2639.76
							ErrBox	ErrBox
							333.85	364.23
							334.15	364.23
[truncated: 862 more rows]

## Sheet: PlotDat5
Source sheet	Sedimentry	0	0	175	0	0	0
Plot name	ProbDens2	1.75	0	262.5	0	3498.25	0
Plot Type	16	3.5	0	262.5	128
1st free col	9	5.25	0	175	128
Sigma Level	1	7	0	175	0
Absolute Errs	TRUE	8.75	0	ErrBox	ErrBox
Symbol Type	1	10.5	0	262.5	0
Inverse Plot	FALSE	12.25	0	350	0
Color Plot	TRUE	14	0	350	242
3D plot	FALSE	15.75	0	262.5	242
Linear	FALSE	17.5	0	262.5	0
Data Range	AA2:AB648	19.25	0	ErrBox	ErrBox
Filled Symbols	TRUE	21	0	350	0
ConcAge	FALSE	22.75	0	437.5	0
ConcSwap	FALSE	24.5	0	437.5	38
1st Symbol-row	1	26.25	0	350	38
		28	0	350	0
		29.75	0	ErrBox	ErrBox
		31.5	0	437.5	0
		33.25	0	525	0
		35	0	525	5
		36.75	0	437.5	5
		38.5	0	437.5	0
		40.25	0	ErrBox	ErrBox
		42	0	525	0
		43.75	0	612.5	0
		45.5	0	612.5	10
		47.25	0	525	10
		49	0	525	0
		50.75	0	ErrBox	ErrBox
		52.5	0	612.5	0
		54.25	0	700	0
		56	0	700	4
		57.75	0	612.5	4
		59.5	0	612.5	0
		61.25	0	ErrBox	ErrBox
		63	0	787.5	0
		64.75	0	875	0
		66.5	0	875	4
		68.25	0	787.5	4
		70	0	787.5	0
		71.75	0	ErrBox	ErrBox
		73.5	0	875	0
		75.25	0	962.5	0
		77	0	962.5	7
		78.75	0	875	7
		80.5	0	875	0
		82.25	0	ErrBox	ErrBox
		84	0	962.5	0
		85.75	0	1050	0
		87.5	0	1050	2
		89.25	0	962.5	2
		91	0	962.5	0
		92.75	0	ErrBox	ErrBox
		94.5	0	1050	0
		96.25	0	1137.5	0
		98	0	1137.5	2
		99.75	0	1050	2
		101.5	0	1050	0
		103.25	0	ErrBox	ErrBox
		105	0	1137.5	0
		106.75	0	1225	0
		108.5	0	1225	7
		110.25	0	1137.5	7
		112	0	1137.5	0
		113.75	0	ErrBox	ErrBox
		115.5	0	1225	0
		117.25	0	1312.5	0
		119	0	1312.5	3
		120.75	0	1225	3
		122.5	0	1225	0
		124.25	0	ErrBox	ErrBox
		126	0	1312.5	0
		127.75	0	1400	0
		129.5	0	1400	1
		131.25	0	1312.5	1
		133	0	1312.5	0
		134.75	0	ErrBox	ErrBox
		136.5	0	1400	0
		138.25	0	1487.5	0
		140	0	1487.5	1
		141.75	0	1400	1
		143.5	0	1400	0
		145.25	0	ErrBox	ErrBox
		147	0	1487.5	0
		148.75	0	1575	0
		150.5	0	1575	1
		152.25	0	1487.5	1
		154	0	1487.5	0
		155.75	0	ErrBox	ErrBox
		157.5	0	1575	0
		159.25	0	1662.5	0
		161	0	1662.5	3
		162.75	0	1575	3
		164.5	0	1575	0
		166.25	0	ErrBox	ErrBox
		168	0	1662.5	0
		169.75	0	1750	0
		171.5	0	1750	3
		173.25	0	1662.5	3
		175	0	1662.5	0
		176.75	0	ErrBox	ErrBox
		178.5	0	1750	0
		180.25	0	1837.5	0
		182	0	1837.5	6
		183.75	0	1750	6
		185.5	0	1750	0
		187.25	0	ErrBox	ErrBox
		189	0	1837.5	0
		190.75	0	1925	0
		192.5	0	1925	3
		194.25	0	1837.5	3
		196	0	1837.5	0
		197.75	0	ErrBox	ErrBox
		199.5	3.61359e-09	1925	0
		201.25	1.57451e-08	2012.5	0
		203	6.50628e-08	2012.5	2
		204.75	2.45918e-07	1925	2
		206.5	8.0864e-07	1925	0
		208.25	2.41122e-06	ErrBox	ErrBox
		210	6.52718e-06	2100	0
		211.75	1.6061e-05	2187.5	0
		213.5	3.59872e-05	2187.5	1
		215.25	7.33961e-05	2100	1
		217	0.000136452	2100	0
		218.75	0.000231807	ErrBox	ErrBox
		220.5	0.000361953	2187.5	0
		222.25	0.000524861	2275	0
		224	0.000717866	2275	1
		225.75	0.000943907	2187.5	1
		227.5	0.0012148	2187.5	0
		229.25	0.00154908	ErrBox	ErrBox
		231	0.00196899	2450	0
		232.75	0.00249994	2537.5	0
		234.5	0.00316391	2537.5	1
		236.25	0.00395726	2450	1
		238	0.00482997	2450	0
		239.75	0.00569479	ErrBox	ErrBox
		241.5	0.00646579	2625	0
		243.25	0.00710271	2712.5	0
		245	0.00764083	2712.5	1
		246.75	0.00818106	2625	1
		248.5	0.00882325	2625	0
		250.25	0.00958005	ErrBox	ErrBox
		252	0.0103446	3150	0
		253.75	0.0109451	3237.5	0
		255.5	0.0112343	3237.5	1
		257.25	0.0111365	3150	1
		259	0.0106533	3150	0
		260.75	0.00986506	ErrBox	ErrBox
		262.5	0.008911
		264.25	0.00792504
		266	0.00698876
		267.75	0.00614855
		269.5	0.00544996
		271.25	0.00492876
		273	0.00457877
		274.75	0.00435158
		276.5	0.00419578
		278.25	0.00409514
		280	0.00407204
		281.75	0.00416113
		283.5	0.00438189
		285.25	0.00472889
		287	0.00517701
		288.75	0.00569278
		290.5	0.00624537
		292.25	0.00680676
		294	0.00733288
		295.75	0.00774367
		297.5	0.00794367
		299.25	0.00789003
		301	0.00764413
		302.75	0.00734544
		304.5	0.00712962
		306.25	0.00706138
		308	0.00711874
		309.75	0.00721834
		311.5	0.00726129
		313.25	0.00718309
		315	0.0069854
		316.75	0.00672928
		318.5	0.00649435
		320.25	0.006336
		322	0.006268
		323.75	0.00627112
		325.5	0.00630976
		327.25	0.00634435
		329	0.00633901
		330.75	0.00626811
		332.5	0.00612129
		334.25	0.00590461
		336	0.00563702
		337.75	0.00534403
		339.5	0.00505095
		341.25	0.00477626
		343	0.00452634
		344.75	0.00429367
		346.5	0.00406064
		348.25	0.00380798
		350	0.00352361
		351.75	0.00320754
		353.5	0.00287128
		355.25	0.00253297
		357	0.00221137
		358.75	0.00192132
		360.5	0.0016713
		362.25	0.00146334
		364	0.00129418
		365.75	0.00115754
		367.5	0.00104659
		369.25	0.000956022
		371	0.000883055
		372.75	0.000827158
		374.5	0.000788826
		376.25	0.000767956
		378	0.000762626
		379.75	0.00076858
		381.5	0.000779628
		383.25	0.000788897
		385	0.000790413
		386.75	0.000780575
		388.5	0.000758875
		390.25	0.000727623
		392	0.000690857
		393.75	0.000653089
		395.5	0.000618315
		397.25	0.000589632
		399	0.00056899
		400.75	0.000556651
		402.5	0.000550377
		404.25	0.000545252
		406	0.000535087
		407.75	0.000515419
		409.5	0.000486519
		411.25	0.000454286
		413	0.000428093
		414.75	0.000416729
		416.5	0.000424723
		418.25	0.000450739
		420	0.000488248
		421.75	0.00052765
		423.5	0.000558801
		425.25	0.000573277
		427	0.000566081
		428.75	0.000536483
		430.5	0.00048791
		432.25	0.000426861
		434	0.000361306
		435.75	0.000298943
		437.5	0.000245881
		439.25	0.000205933
		441	0.000180512
		442.75	0.000168964
		444.5	0.000169035
		446.25	0.0001774
		448	0.00019012
		449.75	0.000203097
		451.5	0.000212542
		453.25	0.000215461
		455	0.000210078
		456.75	0.000196108
		458.5	0.000174735
		460.25	0.000148314
		462	0.000119821
		463.75	9.22431e-05
		465.5	6.80955e-05
		467.25	4.91329e-05
		469	3.63334e-05
		470.75	3.0065e-05
		472.5	3.02634e-05
		474.25	3.65302e-05
		476	4.80955e-05
		477.75	6.36859e-05
		479.5	8.14345e-05
		481.25	9.89733e-05
		483	0.000113791
		484.75	0.000123767
		486.5	0.000127754
		488.25	0.000125931
		490	0.000119785
		491.75	0.000111698
		493.5	0.000104268
		495.25	9.96332e-05
		497	9.8985e-05
		498.75	0.00010241
		500.5	0.000109046
		502.25	0.000117426
		504	0.000125916
		505.75	0.000133073
		507.5	0.000137889
		509.25	0.000139887
		511	0.000139102
		512.75	0.000135959
		514.5	0.000131137
		516.25	0.000125415
		518	0.000119572
		519.75	0.000114305
		521.5	0.000110199
		523.25	0.000107682
		525	0.000106996
		526.75	0.000108142
		528.5	0.000110832
		530.25	0.000114467
		532	0.000118174
		533.75	0.000120931
		535.5	0.00012175
		537.25	0.000119894
		539	0.000115129
		540.75	0.000107868
		542.5	9.92485e-05
		544.25	9.10313e-05
		546	8.53383e-05
		547.75	8.42061e-05
		549.5	8.8991e-05
		551.25	9.98393e-05
		553	0.000115376
		554.75	0.000132875
		556.5	0.000148977
		558.25	0.000160766
		560	0.000166812
		561.75	0.000167709
		563.5	0.000165874
		565.25	0.000164702
		567	0.000167476
		568.75	0.000176475
		570.5	0.000192601
		572.25	0.000215469
		574	0.000243833
		575.75	0.000276036
		577.5	0.00031034
		579.25	0.000345064
		581	0.000378618
		582.75	0.00040948
		584.5	0.000436211
		586.25	0.000457512
		588	0.00047233
		589.75	0.000479955
		591.5	0.000480104
		593.25	0.000472933
		595	0.000459017
		596.75	0.000439282
		598.5	0.000414911
		600.25	0.000387251
		602	0.000357715
		603.75	0.000327689
		605.5	0.000298432
		607.25	0.000270981
		609	0.00024607
		610.75	0.000224074
		612.5	0.000204993
		614.25	0.000188479
		616	0.000173939
		617.75	0.000160644
		619.5	0.00014788
		621.25	0.000135069
		623	0.000121866
		624.75	0.000108202
		626.5	9.42684e-05
		628.25	8.04688e-05
		630	6.73206e-05
		631.75	5.53735e-05
		633.5	4.51267e-05
		635.25	3.69763e-05
		637	3.11767e-05
		638.75	2.78481e-05
		640.5	2.69779e-05
		642.25	2.84415e-05
		644	3.20076e-05
		645.75	3.73525e-05
		647.5	4.40712e-05
		649.25	5.16865e-05
		651	5.96628e-05
		652.75	6.7444e-05
		654.5	7.45052e-05
		656.25	8.04012e-05
		658	8.48214e-05
		659.75	8.76326e-05
		661.5	8.88993e-05
		663.25	8.8877e-05
		665	8.7972e-05
		666.75	8.66938e-05
		668.5	8.55558e-05
		670.25	8.50227e-05
		672	8.54315e-05
		673.75	8.69583e-05
		675.5	8.96047e-05
		677.25	9.32141e-05
		679	9.75108e-05
		680.75	0.00010215
		682.5	0.000106769
		684.25	0.000111029
		686	0.000114644
		687.75	0.000117386
		689.5	0.000119082
		691.25	0.000119604
		693	0.000118854
		694.75	0.000116759
		696.5	0.000113278
		698.25	0.000108405
		700	0.000102196
		701.75	9.47744e-05
		703.5	8.63397e-05
		705.25	7.71642e-05
		707	6.75731e-05
		708.75	5.79163e-05
		710.5	4.85401e-05
		712.25	3.97473e-05
		714	3.17778e-05
		715.75	2.47917e-05
		717.5	1.88647e-05
		719.25	1.39956e-05
		721	1.01204e-05
		722.75	7.13118e-06
		724.5	4.89552e-06
		726.25	3.27371e-06
		728	2.13221e-06
		729.75	1.35247e-06
		731.5	8.35403e-07
		733.25	5.00663e-07
		735	2.93428e-07
		736.75	1.67416e-07
		738.5	9.29888e-08
		740.25	5.02811e-08
		742	2.64678e-08
		743.75	1.58158e-08
		745.5	9.29506e-09
		747.25	6.1227e-09
		749	3.17944e-09
		750.75	3.5611e-09
		752.5	3.98548e-09
		754.25	4.45698e-09
		756	4.98039e-09
		757.75	5.56096e-09
		759.5	6.20438e-09
		761.25	6.91689e-09
		763	7.70523e-09
		764.75	8.57677e-09
		766.5	9.53949e-09
		768.25	1.0602e-08
		770	1.17738e-08
		771.75	1.30649e-08
		773.5	1.44864e-08
		775.25	1.60501e-08
		777	1.77688e-08
		778.75	1.96562e-08
		780.5	2.17273e-08
		782.25	2.7304e-08
		784	3.24532e-08
		785.75	3.97861e-08
		787.5	5.05976e-08
		789.25	6.69085e-08
		791	9.18078e-08
		792.75	1.29911e-07
		794.5	1.87958e-07
		796.25	2.75549e-07
		798	4.0602e-07
		799.75	5.97415e-07
		801.5	8.73468e-07
		803.25	1.26779e-06
		805	1.81744e-06
		806.75	2.56551e-06
		808.5	3.5675e-06
		810.25	4.8832e-06
		812	6.57642e-06
		813.75	8.71161e-06
		815.5	1.13495e-05
		817.25	1.45417e-05
		819	1.83255e-05
		820.75	2.27181e-05
		822.5	2.7716e-05
		824.25	3.32815e-05
		826	3.93565e-05
		827.75	4.58571e-05
		829.5	5.26807e-05
		831.25	5.97137e-05
		833	6.68406e-05
		834.75	7.3956e-05
		836.5	8.09662e-05
		838.25	8.78048e-05
		840	9.44344e-05
		841.75	0.000100857
		843.5	0.000107113
		845.25	0.000113312
		847	0.000119649
		848.75	0.000126411
		850.5	0.000134015
		852.25	0.000142971
		854	0.00015381
		855.75	0.000166941
		857.5	0.000182443
		859.25	0.000199864
		861	0.000218091
		862.75	0.000235395
		864.5	0.000249688
		866.25	0.000258964
		868	0.00026181
		869.75	0.000257808
		871.5	0.000247676
		873.25	0.000233114
		875	0.000216377
		876.75	0.00019976
		878.5	0.000185146
		880.25	0.000173748
		882	0.000166061
		883.75	0.00016199
		885.5	0.000161065
		887.25	0.00016264
		889	0.00016604
		890.75	0.000170643
		892.5	0.000175897
		894.25	0.000181321
		896	0.000186478
		897.75	0.000190983
		899.5	0.000194497
		901.25	0.000196751
		903	0.000197547
		904.75	0.000196794
		906.5	0.000194505
		908.25	0.000190808
		910	0.00018593
		911.75	0.000180186
		913.5	0.000173949
		915.25	0.000167612
		917	0.000161576
		918.75	0.000156197
		920.5	0.000151779
		922.25	0.000148549
		924	0.000146653
		925.75	0.000146156
		927.5	0.000147042
		929.25	0.000149233
		931	0.000152598
		932.75	0.000156969
		934.5	0.000162147
		936.25	0.00016792
		938	0.000174057
		939.75	0.000180326
		941.5	0.000186485
		943.25	0.000192291
		945	0.000197501
		946.75	0.000201877
		948.5	0.000205188
		950.25	0.000207233
		952	0.000207832
		953.75	0.000206852
		955.5	0.000204205
		957.25	0.00019987
		959	0.000193883
		960.75	0.000186348
		962.5	0.000177423
		964.25	0.000167325
		966	0.000156301
		967.75	0.000144626
		969.5	0.000132585
		971.25	0.000120459
		973	0.000108509
		974.75	9.69699e-05
		976.5	8.60361e-05
		978.25	7.58618e-05
		980	6.65571e-05
		981.75	5.81922e-05
		983.5	5.07914e-05
		985.25	4.43512e-05
		987	3.88384e-05
		988.75	3.41982e-05
		990.5	3.03608e-05
		992.25	2.7247e-05
		994	2.47741e-05
		995.75	2.28595e-05
		997.5	2.14219e-05
		999.25	2.03921e-05
		1001	1.97042e-05
		1002.75	1.9299e-05
		1004.5	1.91274e-05
		1006.25	1.91485e-05
		1008	1.93287e-05
		1009.75	1.96435e-05
		1011.5	2.00676e-05
		1013.25	2.05848e-05
		1015	2.11867e-05
		1016.75	2.18614e-05
		1018.5	2.2602e-05
		1020.25	2.34035e-05
		1022	2.42619e-05
		1023.75	2.51728e-05
		1025.5	2.61364e-05
		1027.25	2.71481e-05
		1029	2.82053e-05
		1030.75	2.93053e-05
		1032.5	3.04429e-05
		1034.25	3.16215e-05
		1036	3.28301e-05
		1037.75	3.40663e-05
		1039.5	3.53255e-05
		1041.25	3.66027e-05
		1043	3.78925e-05
		1044.75	3.91894e-05
		1046.5	4.04875e-05
		1048.25	4.1781e-05
		1050	4.30641e-05
		1051.75	4.43309e-05
		1053.5	4.5576e-05
		1055.25	4.6794e-05
		1057	4.79801e-05
		1058.75	4.91299e-05
		1060.5	5.02395e-05
		1062.25	5.13057e-05
		1064	5.2326e-05
		1065.75	5.32986e-05
		1067.5	5.42226e-05
		1069.25	5.50977e-05
		1071	5.59246e-05
		1072.75	5.67049e-05
		1074.5	5.74406e-05
		1076.25	5.81349e-05
		1078	5.87915e-05
		1079.75	5.94147e-05
		1081.5	6.00094e-05
		1083.25	6.05837e-05
		1085	6.11387e-05
		1086.75	6.16827e-05
		1088.5	6.22218e-05
		1090.25	6.27624e-05
		1092	6.33108e-05
		1093.75	6.38731e-05
		1095.5	6.44552e-05
		1097.25	6.5065e-05
		1099	6.57035e-05
		1100.75	6.63796e-05
		1102.5	6.70933e-05
		1104.25	6.785e-05
		1106	6.86526e-05
		1107.75	6.95035e-05
		1109.5	7.04043e-05
		1111.25	7.13557e-05
		1113	7.23582e-05
		1114.75	7.34114e-05
		1116.5	7.45142e-05
		1118.25	7.56653e-05
		1120	7.68626e-05
		1121.75	7.81038e-05
		1123.5	7.93859e-05
		1125.25	8.0706e-05
		1127	8.20607e-05
		1128.75	8.34464e-05
		1130.5	8.48597e-05
		1132.25	8.62969e-05
		1134	8.77544e-05
		1135.75	8.92286e-05
		1137.5	9.07162e-05
		1139.25	9.22139e-05
		1141	9.37185e-05
		1142.75	9.52274e-05
		1144.5	9.67377e-05
		1146.25	9.8247e-05
		1148	9.97553e-05
		1149.75	0.000101257
		1151.5	0.000102752
		1153.25	0.000104237
		1155	0.000105713
		1156.75	0.000107176
		1158.5	0.000108626
		1160.25	0.00011006
		1162	0.000111477
		1163.75	0.000112874
		1165.5	0.00011425
		1167.25	0.000115602
		1169	0.000116927
		1170.75	0.000118221
		1172.5	0.000119483
		1174.25	0.000120708
		1176	0.000121891
		1177.75	0.00012303
		1179.5	0.000124119
		1181.25	0.000125154
		1183	0.00012613
		1184.75	0.000127043
		1186.5	0.000127888
		1188.25	0.000128661
		1190	0.000129359
		1191.75	0.000129977
		1193.5	0.000130514
		1195.25	0.000130966
		1197	0.000131333
		1198.75	0.000131614
		1200.5	0.000131807
		1202.25	0.000131917
		1204	0.000131945
		1205.75	0.000131893
		1207.5	0.000131765
		1209.25	0.000131565
		1211	0.0001313
		1212.75	0.000130975
		1214.5	0.000130597
		1216.25	0.000130171
		1218	0.000129704
		1219.75	0.000129204
		1221.5	0.000128675
		1223.25	0.000128124
		1225	0.000127555
		1226.75	0.000126973
		1228.5	0.000126379
		1230.25	0.000125776
		1232	0.000125164
		1233.75	0.000124541
		1235.5	0.000123905
		1237.25	0.000123253
		1239	0.000122578
		1240.75	0.000121874
		1242.5	0.000121134
		1244.25	0.00012035
		1246	0.000119512
		1247.75	0.00011861
		1249.5	0.000117635
		1251.25	0.000116578
		1253	0.000115429
		1254.75	0.00011418
		1256.5	0.000112823
		1258.25	0.000111353
		1260	0.000109764
		1261.75	0.000108053
		1263.5	0.000106219
		1265.25	0.000104261
		1267	0.000102183
		1268.75	9.99858e-05
		1270.5	9.76799e-05
		1272.25	9.52706e-05
		1274	9.27672e-05
		1275.75	9.01801e-05
		1277.5	8.75213e-05
		1279.25	8.48036e-05
		1281	8.20404e-05
		1282.75	7.92459e-05
		1284.5	7.64342e-05
		1286.25	7.36217e-05
		1288	7.08184e-05
		1289.75	6.80397e-05
		1291.5	6.52982e-05
		1293.25	6.2606e-05
		1295	5.99739e-05
		1296.75	5.74116e-05
		1298.5	5.49278e-05
		1300.25	5.25297e-05
		1302	5.02234e-05
		1303.75	4.80136e-05
		1305.5	4.59038e-05
		1307.25	4.38963e-05
		1309	4.19923e-05
		1310.75	4.0192e-05
		1312.5	3.84946e-05
		1314.25	3.68985e-05
		1316	3.54014e-05
		1317.75	3.40004e-05
		1319.5	3.2692e-05
		1321.25	3.14725e-05
		1323	3.03377e-05
		1324.75	2.92833e-05
		1326.5	2.83049e-05
		1328.25	2.73981e-05
		1330	2.65583e-05
		1331.75	2.57812e-05
		1333.5	2.50608e-05
		1335.25	2.43968e-05
		1337	2.37831e-05
		1338.75	2.32141e-05
		1340.5	2.26903e-05
		1342.25	2.22062e-05
		1344	2.17588e-05
		1345.75	2.13432e-05
		1347.5	2.09612e-05
		1349.25	2.0608e-05
		1351	2.02814e-05
		1352.75	1.99795e-05
		1354.5	1.97003e-05
		1356.25	1.94425e-05
		1358	1.92043e-05
		1359.75	1.89846e-05
		1361.5	1.87823e-05
		1363.25	1.85961e-05
		1365	1.84254e-05
		1366.75	1.82691e-05
		1368.5	1.81268e-05
		1370.25	1.79977e-05
		1372	1.78814e-05
		1373.75	1.77774e-05
		1375.5	1.76853e-05
		1377.25	1.7603e-05
		1379	1.75346e-05
		1380.75	1.74773e-05
		1382.5	1.74311e-05
		1384.25	1.73957e-05
		1386	1.73713e-05
		1387.75	1.73558e-05
		1389.5	1.73532e-05
		1391.25	1.73614e-05
		1393	1.73804e-05
		1394.75	1.74102e-05
		1396.5	1.74507e-05
		1398.25	1.7502e-05
		1400	1.75663e-05
		1401.75	1.76398e-05
		1403.5	1.77242e-05
		1405.25	1.78195e-05
		1407	1.79256e-05
		1408.75	1.80424e-05
		1410.5	1.81681e-05
		1412.25	1.83067e-05
		1414	1.84559e-05
		1415.75	1.86158e-05
		1417.5	1.87843e-05
		1419.25	1.8964e-05
		1421	1.91566e-05
		1422.75	1.93601e-05
		1424.5	1.95748e-05
		1426.25	1.9799e-05
		1428	2.00377e-05
		1429.75	2.02893e-05
		1431.5	2.05546e-05
		1433.25	2.08348e-05
		1435	2.11312e-05
		1436.75	2.14454e-05
		1438.5	2.17794e-05
		1440.25	2.21332e-05
		1442	2.25138e-05
		1443.75	2.29215e-05
		1445.5	2.33594e-05
		1447.25	2.38307e-05
		1449	2.43389e-05
		1450.75	2.48876e-05
		1452.5	2.54803e-05
		1454.25	2.61208e-05
		1456	2.68125e-05
		1457.75	2.75585e-05
		1459.5	2.83616e-05
		1461.25	2.9224e-05
		1463	3.01471e-05
		1464.75	3.11314e-05
		1466.5	3.21766e-05
		1468.25	3.32809e-05
		1470	3.44412e-05
		1471.75	3.56531e-05
		1473.5	3.69104e-05
		1475.25	3.82056e-05
		1477	3.95292e-05
		1478.75	4.08704e-05
		1480.5	4.22166e-05
		1482.25	4.3554e-05
		1484	4.48675e-05
		1485.75	4.61462e-05
		1487.5	4.73644e-05
		1489.25	4.85088e-05
		1491	4.95621e-05
		1492.75	5.05075e-05
		1494.5	5.13286e-05
		1496.25	5.20104e-05
		1498	5.2539e-05
		1499.75	5.29027e-05
		1501.5	5.30918e-05
		1503.25	5.30991e-05
		1505	5.292e-05
		1506.75	5.2553e-05
		1508.5	5.19993e-05
		1510.25	5.12632e-05
		1512	5.0352e-05
		1513.75	4.92759e-05
		1515.5	4.80475e-05
		1517.25	4.66822e-05
		1519	4.51996e-05
		1520.75	4.36152e-05
		1522.5	4.19515e-05
		1524.25	4.02304e-05
		1526	3.84724e-05
		1527.75	3.67073e-05
		1529.5	3.49515e-05
		1531.25	3.32298e-05
		1533	3.15641e-05
		1534.75	2.99758e-05
		1536.5	2.8485e-05
		1538.25	2.71104e-05
		1540	2.58697e-05
		1541.75	2.47786e-05
		1543.5	2.38516e-05
		1545.25	2.31013e-05
		1547	2.25389e-05
		1548.75	2.2174e-05
		1550.5	2.20144e-05
		1552.25	2.20667e-05
		1554	2.23357e-05
		1555.75	2.28251e-05
		1557.5	2.35368e-05
		1559.25	2.44716e-05
		1561	2.56288e-05
		1562.75	2.70061e-05
		1564.5	2.86001e-05
		1566.25	3.04057e-05
		1568	3.24164e-05
		1569.75	3.46241e-05
		1571.5	3.70191e-05
		1573.25	3.95901e-05
		1575	4.23239e-05
		1576.75	4.52057e-05
		1578.5	4.82188e-05
		1580.25	5.13448e-05
		1582	5.45659e-05
		1583.75	5.78565e-05
		1585.5	6.11946e-05
		1587.25	6.45554e-05
		1589	6.79128e-05
		1590.75	7.12393e-05
		1592.5	7.4507e-05
		1594.25	7.76872e-05
		1596	8.07513e-05
		1597.75	8.36708e-05
		1599.5	8.64182e-05
		1601.25	8.89668e-05
		1603	9.12918e-05
		1604.75	9.33706e-05
		1606.5	9.51831e-05
		1608.25	9.67124e-05
		1610	9.79451e-05
		1611.75	9.88717e-05
		1613.5	9.9485e-05
		1615.25	9.9791e-05
		1617	9.97875e-05
		1618.75	9.94849e-05
		1620.5	9.88965e-05
		1622.25	9.80428e-05
		1624	9.69419e-05
		1625.75	9.56218e-05
		1627.5	9.41124e-05
		1629.25	9.2446e-05
		1631	9.06575e-05
		1632.75	8.87832e-05
		1634.5	8.68603e-05
		1636.25	8.49259e-05
		1638	8.30163e-05
		1639.75	8.11663e-05
		1641.5	7.94085e-05
		1643.25	7.77726e-05
		1645	7.62846e-05
		1646.75	7.49667e-05
		1648.5	7.38366e-05
		1650.25	7.29076e-05
		1652	7.21879e-05
		1653.75	7.16813e-05
		1655.5	7.13865e-05
		1657.25	7.12981e-05
		1659	7.1409e-05
		1660.75	7.17016e-05
		1662.5	7.21611e-05
		1664.25	7.27683e-05
		1666	7.34994e-05
		1667.75	7.43358e-05
		1669.5	7.52508e-05
		1671.25	7.62196e-05
		1673	7.72172e-05
		1674.75	7.82189e-05
		1676.5	7.91986e-05
		1678.25	8.01374e-05
		1680	8.10109e-05
		1681.75	8.18009e-05
		1683.5	8.24842e-05
		1685.25	8.30452e-05
		1687	8.34684e-05
		1688.75	8.37401e-05
		1690.5	8.38489e-05
		1692.25	8.37854e-05
		1694	8.3543e-05
		1695.75	8.31176e-05
		1697.5	8.25081e-05
		1699.25	8.17166e-05
		1701	8.07484e-05
		1702.75	7.96126e-05
		1704.5	7.83217e-05
		1706.25	7.68919e-05
		1708	7.53429e-05
		1709.75	7.36976e-05
		1711.5	7.19821e-05
		1713.25	7.02247e-05
		1715	6.84556e-05
		1716.75	6.67061e-05
		1718.5	6.5006e-05
		1720.25	6.33935e-05
		1722	6.1891e-05
		1723.75	6.05303e-05
		1725.5	5.93294e-05
		1727.25	5.83141e-05
		1729	5.74973e-05
		1730.75	5.6889e-05
		1732.5	5.64938e-05
		1734.25	5.63089e-05
		1736	5.63335e-05
		1737.75	5.65495e-05
		1739.5	5.69416e-05
		1741.25	5.74885e-05
		1743	5.8168e-05
		1744.75	5.89487e-05
		1746.5	5.98035e-05
		1748.25	6.0703e-05
		1750	6.16184e-05
		1751.75	6.25249e-05
		1753.5	6.3394e-05
		1755.25	6.42065e-05
		1757	6.49458e-05
		1758.75	6.56002e-05
		1760.5	6.61635e-05
		1762.25	6.66352e-05
		1764	6.70209e-05
		1765.75	6.73317e-05
		1767.5	6.75846e-05
		1769.25	6.78015e-05
		1771	6.80116e-05
		1772.75	6.82412e-05
		1774.5	6.85257e-05
		1776.25	6.89007e-05
		1778	6.94029e-05
		1779.75	7.00689e-05
		1781.5	7.0933e-05
		1783.25	7.20324e-05
		1785	7.33954e-05
		1786.75	7.50485e-05
		1788.5	7.70133e-05
		1790.25	7.93059e-05
		1792	8.1936e-05
		1793.75	8.49067e-05
		1795.5	8.82141e-05
		1797.25	9.18473e-05
		1799	9.57882e-05
		1800.75	0.000100009
		1802.5	0.000104485
		1804.25	0.000109177
		1806	0.000114041
		1807.75	0.000119032
		1809.5	0.0001241
		1811.25	0.000129193
		1813	0.000134257
		1814.75	0.000139241
		1816.5	0.00014409
		1818.25	0.000148756
		1820	0.000153189
		1821.75	0.000157348
		1823.5	0.000161191
		1825.25	0.000164685
		1827	0.0001678
		1828.75	0.000170514
		1830.5	0.000172809
		1832.25	0.000174673
		1834	0.000176098
		1835.75	0.000177084
		1837.5	0.000177634
		1839.25	0.000177753
		1841	0.000177453
		1842.75	0.000176745
		1844.5	0.000175644
		1846.25	0.000174166
		1848	0.000172328
		1849.75	0.000170147
		1851.5	0.000167641
		1853.25	0.000164827
		1855	0.000161722
		1856.75	0.000158347
		1858.5	0.000154712
		1860.25	0.000150839
		1862	0.000146742
		1863.75	0.000142443
		1865.5	0.000137959
		1867.25	0.00013331
		1869	0.000128517
		1870.75	0.000123602
		1872.5	0.000118588
		1874.25	0.000113501
		1876	0.000108367
		1877.75	0.000103211
		1879.5	9.80618e-05
		1881.25	9.29451e-05
		1883	8.78882e-05
		1884.75	8.29172e-05
		1886.5	7.80571e-05
		1888.25	7.33316e-05
		1890	6.87623e-05
		1891.75	6.43691e-05
		1893.5	6.01698e-05
		1895.25	5.61795e-05
		1897	5.24134e-05
		1898.75	4.88788e-05
		1900.5	4.55858e-05
		1902.25	4.25407e-05
		1904	3.97481e-05
		1905.75	3.72107e-05
		1907.5	3.49298e-05
		1909.25	3.2905e-05
		1911	3.11348e-05
		1912.75	2.96148e-05
		1914.5	2.83451e-05
		1916.25	2.73184e-05
		1918	2.65287e-05
		1919.75	2.59689e-05
		1921.5	2.56308e-05
		1923.25	2.55032e-05
		1925	2.55788e-05
		1926.75	2.58435e-05
		1928.5	2.62833e-05
		1930.25	2.68816e-05
		1932	2.76256e-05
		1933.75	2.8495e-05
		1935.5	2.94707e-05
		1937.25	3.05329e-05
		1939	3.16606e-05
		1940.75	3.28326e-05
		1942.5	3.40278e-05
		1944.25	3.52254e-05
		1946	3.64052e-05
		1947.75	3.75484e-05
		1949.5	3.86359e-05
		1951.25	3.96568e-05
		1953	4.05956e-05
		1954.75	4.14423e-05
		1956.5	4.21893e-05
		1958.25	4.2832e-05
		1960	4.33689e-05
		1961.75	4.37992e-05
		1963.5	4.41308e-05
		1965.25	4.43671e-05
		1967	4.45146e-05
		1968.75	4.45864e-05
		1970.5	4.45906e-05
		1972.25	4.45384e-05
		1974	4.44405e-05
		1975.75	4.43074e-05
		1977.5	4.41483e-05
		1979.25	4.39711e-05
		1981	4.37819e-05
		1982.75	4.35827e-05
		1984.5	4.33801e-05
		1986.25	4.31711e-05
		1988	4.29534e-05
		1989.75	4.27223e-05
		1991.5	4.24718e-05
		1993.25	4.2194e-05
		1995	4.18803e-05
		1996.75	4.1521e-05
		1998.5	4.11066e-05
		2000.25	4.06277e-05
		2002	4.00755e-05
		2003.75	3.94423e-05
		2005.5	3.8722e-05
		2007.25	3.79099e-05
		2009	3.70035e-05
		2010.75	3.60023e-05
		2012.5	3.4908e-05
		2014.25	3.37243e-05
		2016	3.24556e-05
		2017.75	3.1113e-05
		2019.5	2.97039e-05
		2021.25	2.82391e-05
		2023	2.67327e-05
		2024.75	2.51935e-05
		2026.5	2.36361e-05
		2028.25	2.20739e-05
		2030	2.05197e-05
		2031.75	1.8986e-05
		2033.5	1.74846e-05
		2035.25	1.60262e-05
		2037	1.46205e-05
		2038.75	1.3276e-05
		2040.5	1.19997e-05
		2042.25	1.07974e-05
		2044	9.67358e-06
		2045.75	8.63154e-06
		2047.5	7.67331e-06
		2049.25	6.79992e-06
		2051	6.0115e-06
		2052.75	5.30742e-06
		2054.5	4.68647e-06
		2056.25	4.14702e-06
		2058	3.68718e-06
		2059.75	3.30493e-06
		2061.5	2.99641e-06
		2063.25	2.76416e-06
		2065	2.60402e-06
		2066.75	2.51479e-06
		2068.5	2.49568e-06
		2070.25	2.54631e-06
		2072	2.66673e-06
		2073.75	2.85741e-06
		2075.5	3.11917e-06
		2077.25	3.45314e-06
		2079	3.86068e-06
		2080.75	4.34323e-06
		2082.5	4.90221e-06
		2084.25	5.5389e-06
		2086	6.25421e-06
		2087.75	7.04862e-06
		2089.5	7.92193e-06
		2091.25	8.87315e-06
		2093	9.90034e-06
		2094.75	1.10005e-05
		2096.5	1.21692e-05
		2098.25	1.34011e-05
		2100	1.46892e-05
		2101.75	1.60251e-05
		2103.5	1.73991e-05
		2105.25	1.88001e-05
		2107	2.02158e-05
		2108.75	2.16327e-05
		2110.5	2.30364e-05
		2112.25	2.44117e-05
		2114	2.57435e-05
		2115.75	2.70162e-05
		2117.5	2.82136e-05
		2119.25	2.93203e-05
		2121	3.03219e-05
		2122.75	3.1205e-05
		2124.5	3.19577e-05
		2126.25	3.25695e-05
		2128	3.30323e-05
		2129.75	3.33396e-05
		2131.5	3.34877e-05
		2133.25	3.34751e-05
		2135	3.3303e-05
		2136.75	3.29749e-05
		2138.5	3.24971e-05
		2140.25	3.1878e-05
		2142	3.11285e-05
		2143.75	3.02614e-05
		2145.5	2.92914e-05
		2147.25	2.82347e-05
		2149	2.71089e-05
		2150.75	2.59323e-05
		2152.5	2.47242e-05
		2154.25	2.3504e-05
		2156	2.22913e-05
		2157.75	2.11052e-05
		2159.5	1.99647e-05
		2161.25	1.88876e-05
		2163	1.78908e-05
		2164.75	1.69902e-05
		2166.5	1.61999e-05
		2168.25	1.55327e-05
		2170	1.49994e-05
		2171.75	1.46091e-05
		2173.5	1.43688e-05
		2175.25	1.42835e-05
		2177	1.43559e-05
		2178.75	1.45864e-05
		2180.5	1.49732e-05
		2182.25	1.55122e-05
		2184	1.61967e-05
		2185.75	1.70179e-05
		2187.5	1.79645e-05
		2189.25	1.90233e-05
		2191	2.01788e-05
		2192.75	2.14135e-05
		2194.5	2.27084e-05
		2196.25	2.40431e-05
		2198	2.53958e-05
		2199.75	2.67442e-05
		2201.5	2.80655e-05
		2203.25	2.93368e-05
		2205	3.05357e-05
		2206.75	3.16409e-05
		2208.5	3.26323e-05
		2210.25	3.34913e-05
		2212	3.42018e-05
		2213.75	3.47501e-05
		2215.5	3.51253e-05
		2217.25	3.53195e-05
		2219	3.5328e-05
		2220.75	3.51493e-05
		2222.5	3.47853e-05
		2224.25	3.4241e-05
		2226	3.35244e-05
		2227.75	3.26463e-05
		2229.5	3.16198e-05
		2231.25	3.04603e-05
		2233	2.91847e-05
		2234.75	2.78113e-05
		2236.5	2.6359e-05
		2238.25	2.48473e-05
		2240	2.32953e-05
		2241.75	2.17219e-05
		2243.5	2.01433e-05
		2245.25	1.85799e-05
		2247	1.70448e-05
		2248.75	1.55516e-05
		2250.5	1.41123e-05
		2252.25	1.27366e-05
		2254	1.14327e-05
		2255.75	1.02065e-05
		2257.5	9.06239e-06
		2259.25	8.00284e-06
		2261	7.02881e-06
		2262.75	6.13982e-06
		2264.5	5.33415e-06
		2266.25	4.60905e-06
		2268	3.96089e-06
		2269.75	3.38541e-06
		2271.5	2.87783e-06
		2273.25	2.43308e-06
		2275	2.04589e-06
		2276.75	1.71098e-06
		2278.5	1.42312e-06
		2280.25	1.17727e-06
		2282	9.68608e-07
		2283.75	7.92602e-07
		2285.5	6.45057e-07
		2287.25	5.22128e-07
		2289	4.20331e-07
		2290.75	3.36545e-07
		2292.5	2.67997e-07
		2294.25	2.12253e-07
		2296	1.67191e-07
		2297.75	1.30981e-07
		2299.5	1.02056e-07
		2301.25	7.90875e-08
		2303	6.09553e-08
		2304.75	4.67252e-08
		2306.5	3.56227e-08
		2308.25	2.70109e-08
		2310	2.03698e-08
		2311.75	1.52782e-08
		2313.5	1.1397e-08
		2315.25	8.45568e-09
		2317	6.23937e-09
		2318.75	4.57899e-09
		2320.5	3.34221e-09
		2322.25	2.42625e-09
		2324	0
		2325.75	0
		2327.5	0
		2329.25	0
		2331	0
		2332.75	0
		2334.5	0
		2336.25	0
		2338	0
		2339.75	0
		2341.5	0
		2343.25	0
		2345	0
		2346.75	0
		2348.5	0
		2350.25	0
		2352	0
		2353.75	0
		2355.5	0
		2357.25	0
		2359	0
		2360.75	0
		2362.5	0
		2364.25	0
		2366	0
		2367.75	0
		2369.5	0
		2371.25	0
		2373	0
		2374.75	0
		2376.5	0
		2378.25	0
		2380	0
		2381.75	0
		2383.5	0
		2385.25	0
		2387	0
		2388.75	0
		2390.5	0
		2392.25	2.97668e-09
		2394	4.56202e-09
		2395.75	6.92459e-09
		2397.5	1.04098e-08
		2399.25	1.5499e-08
		2401	2.28546e-08
		2402.75	3.33778e-08
		2404.5	4.82783e-08
		2406.25	6.91606e-08
		2408	9.81244e-08
		2409.75	1.37882e-07
		2411.5	1.91888e-07
		2413.25	2.64485e-07
		2415	3.61049e-07
		2416.75	4.88137e-07
		2418.5	6.53627e-07
		2420.25	8.66821e-07
		2422	1.13852e-06
		2423.75	1.48103e-06
		2425.5	1.90809e-06
		2427.25	2.43469e-06
		2429	3.07682e-06
		2430.75	3.85098e-06
		2432.5	4.77367e-06
		2434.25	5.86064e-06
		2436	7.12605e-06
		2437.75	8.58153e-06
		2439.5	1.02351e-05
		2441.25	1.20901e-05
		2443	1.41443e-05
		2444.75	1.63887e-05
		2446.5	1.8807e-05
		2448.25	2.13749e-05
		2450	2.40603e-05
		2451.75	2.68232e-05
		2453.5	2.96163e-05
		2455.25	3.23864e-05
		2457	3.50758e-05
		2458.75	3.76238e-05
		2460.5	3.99696e-05
		2462.25	4.20541e-05
		2464	4.38226e-05
		2465.75	4.52273e-05
		2467.5	4.6229e-05
		2469.25	4.67993e-05
		2471	4.6922e-05
		2472.75	4.65934e-05
		2474.5	4.58231e-05
		2476.25	4.4633e-05
		2478	4.30566e-05
		2479.75	4.11372e-05
		2481.5	3.89261e-05
		2483.25	3.64804e-05
		2485	3.38602e-05
		2486.75	3.11266e-05
		2488.5	2.8339e-05
		2490.25	2.55534e-05
		2492	2.28205e-05
		2493.75	2.01843e-05
		2495.5	1.76813e-05
		2497.25	1.534e-05
		2499	1.3181e-05
		2500.75	1.12171e-05
		2502.5	9.45427e-06
		2504.25	7.89198e-06
		2506	6.52462e-06
		2507.75	5.3424e-06
		2509.5	4.33241e-06
		2511.25	3.47963e-06
		2513	2.76789e-06
		2514.75	2.18061e-06
		2516.5	1.70144e-06
		2518.25	1.31482e-06
		2520	1.00631e-06
		2521.75	7.62788e-07
		2523.5	5.7265e-07
		2525.25	4.25782e-07
		2527	3.13542e-07
		2528.75	2.28674e-07
		2530.5	1.65177e-07
		2532.25	1.18166e-07
		2534	8.37237e-08
		2535.75	5.8751e-08
		2537.5	4.08314e-08
		2539.25	2.81051e-08
		2541	1.91596e-08
		2542.75	1.2936e-08
		2544.5	8.65019e-09
		2546.25	5.72879e-09
		2548	3.75761e-09
		2549.75	2.44102e-09
		2551.5	0
		2553.25	0
		2555	0
		2556.75	0
		2558.5	2.65782e-09
		2560.25	3.62958e-09
		2562	4.93085e-09
		2563.75	6.66384e-09
		2565.5	8.95907e-09
		2567.25	1.19822e-08
		2569	1.59423e-08
		2570.75	2.11008e-08
		2572.5	2.77832e-08
		2574.25	3.63918e-08
		2576	4.74199e-08
		2577.75	6.14688e-08
		2579.5	7.92656e-08
		2581.25	1.01684e-07
		2583	1.29764e-07
		2584.75	1.64738e-07
		2586.5	2.08051e-07
		2588.25	2.61386e-07
		2590	3.26686e-07
		2591.75	4.06178e-07
		2593.5	5.02386e-07
		2595.25	6.18152e-07
		2597	7.56641e-07
		2598.75	9.21342e-07
		2600.5	1.11606e-06
		2602.25	1.34491e-06
		2604	1.61225e-06
		2605.75	1.92269e-06
		2607.5	2.28098e-06
		2609.25	2.69197e-06
		2611	3.16051e-06
		2612.75	3.6913e-06
		2614.5	4.28882e-06
		2616.25	4.95716e-06
		2618	5.69986e-06
		2619.75	6.51977e-06
		2621.5	7.41885e-06
		2623.25	8.39803e-06
		2625	9.45703e-06
		2626.75	1.05942e-05
		2628.5	1.18064e-05
		2630.25	1.30889e-05
		2632	1.44354e-05
		2633.75	1.58375e-05
		2635.5	1.72855e-05
		2637.25	1.87679e-05
		2639	2.02714e-05
		2640.75	2.17815e-05
		2642.5	2.32825e-05
		2644.25	2.47576e-05
		2646	2.61892e-05
		2647.75	2.75596e-05
		2649.5	2.88509e-05
		2651.25	3.00458e-05
		2653	3.11274e-05
		2654.75	3.20804e-05
		2656.5	3.28907e-05
		2658.25	3.35461e-05
		2660	3.40367e-05
		2661.75	3.4355e-05
		2663.5	3.4496e-05
		2665.25	3.44575e-05
		2667	3.42401e-05
		2668.75	3.38472e-05
		2670.5	3.32848e-05
		2672.25	3.25617e-05
		2674	3.16887e-05
		2675.75	3.06788e-05
		2677.5	2.95466e-05
		2679.25	2.83083e-05
		2681	2.69809e-05
		2682.75	2.55821e-05
		2684.5	2.41297e-05
		2686.25	2.26414e-05
		2688	2.11345e-05
		2689.75	1.96253e-05
		2691.5	1.81292e-05
		2693.25	1.666e-05
		2695	1.52304e-05
		2696.75	1.3851e-05
		2698.5	1.25311e-05
		2700.25	1.1278e-05
		2702	1.00974e-05
		2703.75	8.99347e-06
		2705.5	7.96856e-06
		2707.25	7.02375e-06
		2709	6.15878e-06
		2710.75	5.37225e-06
		2712.5	4.66181e-06
		2714.25	4.02429e-06
		2716	3.4559e-06
		2717.75	2.95235e-06
		2719.5	2.50907e-06
		2721.25	2.12126e-06
		2723	1.78406e-06
		2724.75	1.49267e-06
		2726.5	1.24238e-06
		2728.25	1.02868e-06
		2730	8.47309e-07
		2731.75	6.9429e-07
		2733.5	5.65948e-07
		2735.25	4.58932e-07
		2737	3.70217e-07
		2738.75	2.97099e-07
		2740.5	2.37182e-07
		2742.25	1.88365e-07
		2744	1.48818e-07
		2745.75	1.16962e-07
		2747.5	9.14474e-08
		2749.25	7.1127e-08
		2751	5.50344e-08
		2752.75	4.23614e-08
		2754.5	3.24372e-08
		2756.25	2.47088e-08
		2758	1.87239e-08
		2759.75	1.41149e-08
		2761.5	1.05852e-08
		2763.25	7.89682e-09
		2765	5.86062e-09
		2766.75	4.32684e-09
		2768.5	3.17786e-09
		2770.25	2.32185e-09
		2772	0
		2773.75	0
		2775.5	0
		2777.25	0
		2779	0
		2780.75	0
		2782.5	0
		2784.25	0
		2786	0
		2787.75	0
		2789.5	0
		2791.25	0
		2793	0
		2794.75	0
		2796.5	0
		2798.25	0
		2800	0
		2801.75	0
		2803.5	0
		2805.25	0
		2807	0
		2808.75	0
		2810.5	0
		2812.25	0
		2814	0
		2815.75	0
		2817.5	0
		2819.25	0
		2821	0
		2822.75	0
		2824.5	0
		2826.25	0
		2828	0
		2829.75	0
		2831.5	0
		2833.25	0
		2835	0
		2836.75	0
		2838.5	0
		2840.25	0
		2842	0
		2843.75	0
		2845.5	0
		2847.25	0
		2849	0
		2850.75	0
		2852.5	0
		2854.25	0
		2856	0
		2857.75	0
		2859.5	0
		2861.25	0
		2863	0
		2864.75	0
		2866.5	0
		2868.25	0
		2870	0
		2871.75	0
		2873.5	0
		2875.25	0
		2877	0
		2878.75	0
		2880.5	0
		2882.25	0
		2884	0
		2885.75	0
		2887.5	0
		2889.25	0
		2891	0
		2892.75	0
		2894.5	0
		2896.25	0
		2898	0
		2899.75	0
		2901.5	0
		2903.25	0
		2905	0
		2906.75	0
		2908.5	0
		2910.25	0
		2912	0
		2913.75	0
		2915.5	0
		2917.25	0
		2919	0
		2920.75	0
		2922.5	0
		2924.25	0
		2926	0
		2927.75	0
		2929.5	0
		2931.25	0
		2933	0
		2934.75	0
		2936.5	0
		2938.25	0
		2940	0
		2941.75	0
		2943.5	0
		2945.25	0
		2947	0
		2948.75	0
		2950.5	0
		2952.25	0
		2954	0
		2955.75	0
		2957.5	0
		2959.25	0
		2961	0
		2962.75	0
		2964.5	0
		2966.25	0
		2968	0
		2969.75	0
		2971.5	0
		2973.25	0
		2975	0
		2976.75	0
		2978.5	0
		2980.25	0
		2982	0
		2983.75	0
		2985.5	0
		2987.25	0
		2989	0
		2990.75	0
		2992.5	0
		2994.25	0
		2996	0
		2997.75	0
		2999.5	0
		3001.25	0
		3003	0
		3004.75	0
		3006.5	0
		3008.25	0
		3010	0
		3011.75	0
		3013.5	0
		3015.25	0
		3017	0
		3018.75	0
		3020.5	0
		3022.25	0
		3024	0
		3025.75	0
		3027.5	0
		3029.25	0
		3031	0
		3032.75	0
		3034.5	0
		3036.25	0
		3038	0
		3039.75	0
		3041.5	0
		3043.25	0
		3045	0
		3046.75	0
		3048.5	0
		3050.25	0
		3052	0
		3053.75	0
		3055.5	0
		3057.25	0
		3059	0
		3060.75	0
		3062.5	0
		3064.25	0
		3066	0
		3067.75	0
		3069.5	0
		3071.25	0
		3073	0
		3074.75	0
		3076.5	0
		3078.25	0
		3080	0
		3081.75	0
		3083.5	0
		3085.25	0
		3087	0
		3088.75	0
		3090.5	0
		3092.25	0
		3094	0
		3095.75	0
		3097.5	0
		3099.25	0
		3101	0
		3102.75	0
		3104.5	0
		3106.25	0
		3108	0
		3109.75	0
		3111.5	0
		3113.25	0
		3115	0
		3116.75	0
		3118.5	0
		3120.25	0
		3122	0
		3123.75	0
		3125.5	0
		3127.25	0
		3129	0
		3130.75	3.21141e-09
		3132.5	5.02232e-09
		3134.25	7.7714e-09
		3136	1.18982e-08
		3137.75	1.8024e-08
		3139.5	2.70151e-08
		3141.25	4.00635e-08
		3143	5.87867e-08
		3144.75	8.53485e-08
		3146.5	1.22603e-07
		3148.25	1.74257e-07
		3150	2.45058e-07
		3151.75	3.40984e-07
		3153.5	4.69445e-07
		3155.25	6.39476e-07
		3157	8.61886e-07
		3158.75	1.14938e-06
		3160.5	1.51657e-06
		3162.25	1.97993e-06
		3164	2.55754e-06
		3165.75	3.26876e-06
		3167.5	4.13362e-06
		3169.25	5.17209e-06
		3171	6.40306e-06
		3172.75	7.84325e-06
		3174.5	9.50586e-06
		3176.25	1.13992e-05
		3178	1.35252e-05
		3179.75	1.58782e-05
		3181.5	1.84435e-05
		3183.25	2.1197e-05
		3185	2.41041e-05
		3186.75	2.71204e-05
		3188.5	3.01917e-05
		3190.25	3.32557e-05
		3192	3.62436e-05
		3193.75	3.90827e-05
		3195.5	4.16988e-05
		3197.25	4.402e-05
		3199	4.59794e-05
		3200.75	4.75186e-05
		3202.5	4.85904e-05
		3204.25	4.91615e-05
		3206	4.92138e-05
		3207.75	4.87455e-05
		3209.5	4.77716e-05
		3211.25	4.63225e-05
		3213	4.44428e-05
		3214.75	4.21889e-05
		3216.5	3.96261e-05
		3218.25	3.68257e-05
		3220	3.38617e-05
		3221.75	3.08072e-05
		3223.5	2.77322e-05
		3225.25	2.47003e-05
		3227	2.17674e-05
		3228.75	1.89801e-05
		3230.5	1.63749e-05
		3232.25	1.3978e-05
		3234	1.18058e-05
		3235.75	9.86591e-06
		3237.5	8.15763e-06
		3239.25	6.67388e-06
		3241	5.4023e-06
		3242.75	4.3268e-06
		3244.5	3.4288e-06
		3246.25	2.68846e-06
		3248	2.0857e-06
		3249.75	1.60099e-06
		3251.5	1.21594e-06
		3253.25	9.13737e-07
		3255	6.79388e-07
		3256.75	4.99807e-07
		3258.5	3.63808e-07
		3260.25	2.62018e-07
		3262	1.86713e-07
		3263.75	1.31646e-07
		3265.5	9.18387e-08
		3267.25	6.33916e-08
		3269	4.32937e-08
		3270.75	2.92553e-08
		3272.5	1.95601e-08
		3274.25	1.29397e-08
		3276	8.46964e-09
		3277.75	5.4852e-09
		3279.5	3.51485e-09
		3281.25	2.22848e-09
		3283	0
		3284.75	0
		3286.5	0
		3288.25	0
		3290	0
		3291.75	0
		3293.5	0
		3295.25	0
		3297	0
		3298.75	0
		3300.5	0
		3302.25	0
		3304	0
		3305.75	0
		3307.5	0
		3309.25	0
		3311	0
		3312.75	0
		3314.5	0
		3316.25	0
		3318	0
		3319.75	0
		3321.5	0
		3323.25	0
		3325	0
		3326.75	0
		3328.5	0
		3330.25	0
		3332	0
		3333.75	0
		3335.5	0
		3337.25	0
		3339	0
		3340.75	0
		3342.5	0
		3344.25	0
		3346	0
		3347.75	0
		3349.5	0
		3351.25	0
		3353	0
		3354.75	0
		3356.5	0
		3358.25	0
		3360	0
		3361.75	0
		3363.5	0
		3365.25	0
		3367	0
		3368.75	0
		3370.5	0
		3372.25	0
		3374	0
		3375.75	0
		3377.5	0
		3379.25	0
		3381	0
		3382.75	0
		3384.5	0
		3386.25	0
		3388	0
		3389.75	0
		3391.5	0
		3393.25	0
		3395	0
		3396.75	0
		3398.5	0
		3400.25	0
		3402	0
		3403.75	0
		3405.5	0
		3407.25	0
		3409	0
		3410.75	0
		3412.5	0
		3414.25	0
		3416	0
		3417.75	0
		3419.5	0
		3421.25	0
		3423	0
		3424.75	0
		3426.5	0
		3428.25	0
		3430	0
		3431.75	0
		3433.5	0
		3435.25	0
		3437	0
		3438.75	0
		3440.5	0
		3442.25	0
		3444	0
		3445.75	0
		3447.5	0
		3449.25	0
		3451	0
		3452.75	0
		3454.5	0
		3456.25	0
		3458	0
		3459.75	0
		3461.5	0
		3463.25	0
		3465	0
		3466.75	0
		3468.5	0
		3470.25	0
		3472	0
		3473.75	0
		3475.5	0
		3477.25	0
		3479	0
		3480.75	0
		3482.5	0
		3484.25	0
		3486	0
		3487.75	0
		3489.5	0
		3491.25	0
		3493	0
		3494.75	0
		3496.5	0
		3498.25	0
[truncated: 1 more rows]

## Sheet: PlotDat14
Source sheet	Late Permian rocks	200	0	228	0	200	0
Plot name	ProbDens8	200.14	0	256	0	479.86	0
Plot Type	16	200.28	0	256	58
1st free col	9	200.42	0	228	58
Sigma Level	1	200.56	0	228	0
Absolute Errs	TRUE	200.7	0	ErrBox	ErrBox
Symbol Type	1	200.84	0	256	0
Inverse Plot	FALSE	200.98	0	284	0
Color Plot	FALSE	201.12	0	284	151
3D plot	FALSE	201.26	0	256	151
Linear	FALSE	201.4	0	256	0
Data Range	AA1:AB406	201.54	0	ErrBox	ErrBox
Filled Symbols	FALSE	201.68	0	284	0
ConcAge	FALSE	201.82	0	312	0
ConcSwap	FALSE	201.96	0	312	61
1st Symbol-row	1	202.1	0	284	61
		202.24	0	284	0
		202.38	0	ErrBox	ErrBox
		202.52	0	312	0
		202.66	0	340	0
		202.8	0	340	41
		202.94	0	312	41
		203.08	0	312	0
		203.22	0	ErrBox	ErrBox
		203.36	0	340	0
		203.5	0	368	0
		203.64	0	368	18
		203.78	0	340	18
		203.92	3.10552e-09	340	0
		204.06	3.38372e-09	ErrBox	ErrBox
		204.2	3.68558e-09	368	0
		204.34	4.013e-09	396	0
		204.48	4.36802e-09	396	3
		204.62	4.75283e-09	368	3
		204.76	5.16977e-09	368	0
		204.9	5.62137e-09	ErrBox	ErrBox
		205.04	6.11033e-09	424	0
		205.18	6.63956e-09	452	0
		205.32	7.21216e-09	452	3
		205.46	7.83148e-09	424	3
		205.6	8.50108e-09	424	0
		205.74	9.22478e-09	ErrBox	ErrBox
		205.88	1.00067e-08
		206.02	1.08511e-08
		206.16	1.17629e-08
		206.3	1.27468e-08
		206.44	1.38084e-08
		206.58	1.49533e-08
		206.72	1.61876e-08
		206.86	1.75177e-08
		207	1.89508e-08
		207.14	2.0494e-08
		207.28	2.21554e-08
		207.42	2.39433e-08
		207.56	2.58666e-08
		207.7	2.79349e-08
		207.84	3.01583e-08
		207.98	3.25476e-08
		208.12	3.51141e-08
		208.26	4.08995e-08
		208.4	4.71564e-08
		208.54	5.09636e-08
		208.68	5.50617e-08
		208.82	5.94716e-08
		208.96	6.42154e-08
		209.1	6.9317e-08
		209.24	7.48015e-08
		209.38	8.0696e-08
		209.52	8.70289e-08
		209.66	9.3831e-08
		209.8	1.01135e-07
		209.94	1.08974e-07
		210.08	1.17387e-07
		210.22	1.26411e-07
		210.36	1.36089e-07
		210.5	1.46464e-07
		210.64	1.57583e-07
		210.78	1.69497e-07
		210.92	1.82257e-07
		211.06	1.95919e-07
		211.2	2.10543e-07
		211.34	2.26192e-07
		211.48	2.42931e-07
		211.62	2.60833e-07
		211.76	2.7997e-07
		211.9	3.00423e-07
		212.04	3.22274e-07
		212.18	3.45611e-07
		212.32	3.7053e-07
		212.46	3.97126e-07
		212.6	4.25506e-07
		212.74	4.55778e-07
		212.88	4.88059e-07
		213.02	5.22471e-07
		213.16	5.59144e-07
		213.3	5.98212e-07
		213.44	6.39819e-07
		213.58	6.84117e-07
		213.72	7.31263e-07
		213.86	7.81425e-07
		214	8.34778e-07
		214.14	8.91508e-07
		214.28	9.51808e-07
		214.42	1.01588e-06
		214.56	1.08394e-06
		214.7	1.15622e-06
		214.84	1.23294e-06
		214.98	1.31751e-06
		215.12	1.4041e-06
		215.26	1.49593e-06
		215.4	1.59329e-06
		215.54	1.69964e-06
		215.68	1.81269e-06
		215.82	1.9294e-06
		215.96	2.05303e-06
		216.1	2.19037e-06
		216.24	2.33289e-06
		216.38	2.4809e-06
		216.52	2.63759e-06
		216.66	2.80341e-06
		216.8	2.97886e-06
		216.94	3.16443e-06
		217.08	3.36066e-06
		217.22	3.57141e-06
		217.36	3.79103e-06
		217.5	4.02309e-06
		217.64	4.27137e-06
		217.78	4.53045e-06
		217.92	4.80402e-06
		218.06	5.0928e-06
		218.2	5.39758e-06
		218.34	5.71914e-06
		218.48	6.05835e-06
		218.62	6.41609e-06
		218.76	6.79327e-06
		218.9	7.19385e-06
		219.04	7.61328e-06
		219.18	8.05525e-06
		219.32	8.52085e-06
		219.46	9.01126e-06
		219.6	9.5339e-06
		219.74	1.00782e-05
		219.88	1.06512e-05
		220.02	1.12543e-05
		220.16	1.18889e-05
		220.3	1.25566e-05
		220.44	1.32589e-05
		220.58	1.39975e-05
		220.72	1.47741e-05
		220.86	1.55906e-05
		221	1.64489e-05
		221.14	1.73509e-05
		221.28	1.82988e-05
		221.42	1.92946e-05
		221.56	2.03406e-05
		221.7	2.14426e-05
		221.84	2.25968e-05
		221.98	2.38088e-05
		222.12	2.50941e-05
		222.26	2.64319e-05
		222.4	2.78394e-05
		222.54	2.93138e-05
		222.68	3.08642e-05
		222.82	3.24884e-05
		222.96	3.41926e-05
		223.1	3.59805e-05
		223.24	3.78561e-05
		223.38	3.98235e-05
		223.52	4.18869e-05
		223.66	4.40509e-05
		223.8	4.632e-05
		223.94	4.86993e-05
		224.08	5.11969e-05
		224.22	5.38122e-05
		224.36	5.65537e-05
		224.5	5.94271e-05
		224.64	6.24419e-05
		224.78	6.56048e-05
		224.92	6.89164e-05
		225.06	7.23837e-05
		225.2	7.60166e-05
		225.34	7.98259e-05
		225.48	8.38138e-05
		225.62	8.79913e-05
		225.76	9.23672e-05
		225.9	9.6957e-05
		226.04	0.000101758
		226.18	0.000106787
		226.32	0.000112056
		226.46	0.000117573
		226.6	0.000123348
		226.74	0.000129397
		226.88	0.000135731
		227.02	0.000142362
		227.16	0.000149307
		227.3	0.000156574
		227.44	0.000164181
		227.58	0.000172147
		227.72	0.000180477
		227.86	0.000189195
		228	0.000198317
		228.14	0.000207863
		228.28	0.000217849
		228.42	0.000228299
		228.56	0.00023923
		228.7	0.000250667
		228.84	0.000262628
		228.98	0.000275132
		229.12	0.000288205
		229.26	0.000301871
		229.4	0.000316158
		229.54	0.000331082
		229.68	0.000346673
		229.82	0.000362959
		229.96	0.00037997
		230.1	0.000397727
		230.24	0.000416265
		230.38	0.000435608
		230.52	0.000455784
		230.66	0.000476823
		230.8	0.000498759
		230.94	0.000521615
		231.08	0.000545424
		231.22	0.000570214
		231.36	0.00059602
		231.5	0.000622874
		231.64	0.000650792
		231.78	0.000679806
		231.92	0.000709946
		232.06	0.000741239
		232.2	0.000773711
		232.34	0.00080739
		232.48	0.000842299
		232.62	0.000878469
		232.76	0.000915901
		232.9	0.000954631
		233.04	0.000994669
		233.18	0.00103603
		233.32	0.00107874
		233.46	0.0011228
		233.6	0.00116823
		233.74	0.00121503
		233.88	0.00126321
		234.02	0.00131277
		234.16	0.00136372
		234.3	0.00141606
		234.44	0.00146978
		234.58	0.00152488
		234.72	0.00158135
		234.86	0.00163918
		235	0.00169836
		235.14	0.00175887
		235.28	0.00182069
		235.42	0.00188383
		235.56	0.00194824
		235.7	0.00201392
		235.84	0.00208084
		235.98	0.00214897
		236.12	0.00221829
		236.26	0.00228878
		236.4	0.00236039
		236.54	0.00243313
		236.68	0.00250694
		236.82	0.00258181
		236.96	0.0026577
		237.1	0.00273458
		237.24	0.00281244
		237.38	0.00289123
		237.52	0.00297093
		237.66	0.00305152
		237.8	0.00313296
		237.94	0.00321523
		238.08	0.0032983
		238.22	0.00338216
		238.36	0.00346678
		238.5	0.00355214
		238.64	0.0036382
		238.78	0.00372495
		238.92	0.00381238
		239.06	0.00390045
		239.2	0.00398916
		239.34	0.00407848
		239.48	0.0041684
		239.62	0.00425891
		239.76	0.00434998
		239.9	0.00444161
		240.04	0.00453377
		240.18	0.00462645
		240.32	0.00471964
		240.46	0.00481332
		240.6	0.00490748
		240.74	0.00500212
		240.88	0.0050972
		241.02	0.00519273
		241.16	0.00528869
		241.3	0.00538507
		241.44	0.00548185
		241.58	0.00557902
		241.72	0.00567657
		241.86	0.0057745
		242	0.00587279
		242.14	0.00597142
		242.28	0.00607039
		242.42	0.00616968
		242.56	0.0062693
		242.7	0.00636922
		242.84	0.00646945
		242.98	0.00656997
		243.12	0.0066708
		243.26	0.00677191
		243.4	0.0068733
		243.54	0.00697498
		243.68	0.00707694
		243.82	0.00717919
		243.96	0.00728172
		244.1	0.00738456
		244.24	0.0074877
		244.38	0.00759114
		244.52	0.00769489
		244.66	0.00779897
		244.8	0.00790339
		244.94	0.00800817
		245.08	0.00811331
		245.22	0.00821884
		245.36	0.00832476
		245.5	0.00843111
		245.64	0.0085379
		245.78	0.00864515
		245.92	0.00875286
		246.06	0.00886109
		246.2	0.00896982
		246.34	0.0090791
		246.48	0.00918894
		246.62	0.00929937
		246.76	0.00941039
		246.9	0.00952203
		247.04	0.00963431
		247.18	0.00974724
		247.32	0.00986085
		247.46	0.00997513
		247.6	0.0100901
		247.74	0.0102058
		247.88	0.0103222
		248.02	0.0104394
		248.16	0.0105572
		248.3	0.0106758
		248.44	0.0107951
		248.58	0.0109152
		248.72	0.011036
		248.86	0.0111575
		249	0.0112798
		249.14	0.0114027
		249.28	0.0115263
		249.42	0.0116507
		249.56	0.0117757
		249.7	0.0119013
		249.84	0.0120276
		249.98	0.0121545
		250.12	0.012282
		250.26	0.0124101
		250.4	0.0125388
		250.54	0.012668
		250.68	0.0127978
		250.82	0.0129281
		250.96	0.0130588
		251.1	0.0131901
		251.24	0.0133218
		251.38	0.0134539
		251.52	0.0135865
		251.66	0.0137196
		251.8	0.013853
		251.94	0.0139868
		252.08	0.0141211
		252.22	0.0142558
		252.36	0.0143908
		252.5	0.0145263
		252.64	0.0146622
		252.78	0.0147984
		252.92	0.0149351
		253.06	0.0150722
		253.2	0.0152098
		253.34	0.0153478
		253.48	0.0154862
		253.62	0.0156251
		253.76	0.0157644
		253.9	0.0159042
		254.04	0.0160445
		254.18	0.0161853
		254.32	0.0163266
		254.46	0.0164683
		254.6	0.0166106
		254.74	0.0167533
		254.88	0.0168965
		255.02	0.0170402
		255.16	0.0171843
		255.3	0.0173288
		255.44	0.0174738
		255.58	0.0176191
		255.72	0.0177647
		255.86	0.0179106
		256	0.0180567
		256.14	0.018203
		256.28	0.0183494
		256.42	0.0184958
		256.56	0.0186421
		256.7	0.0187884
		256.84	0.0189344
		256.98	0.0190801
		257.12	0.0192254
		257.26	0.0193701
		257.4	0.0195142
		257.54	0.0196575
		257.68	0.0197999
		257.82	0.0199413
		257.96	0.0200816
		258.1	0.0202205
		258.24	0.0203581
		258.38	0.020494
		258.52	0.0206282
		258.66	0.0207606
		258.8	0.0208909
		258.94	0.0210191
		259.08	0.0211449
		259.22	0.0212682
		259.36	0.021389
		259.5	0.0215069
		259.64	0.0216219
		259.78	0.0217339
		259.92	0.0218426
		260.06	0.021948
		260.2	0.0220499
		260.34	0.0221481
		260.48	0.0222426
		260.62	0.0223332
		260.76	0.0224197
		260.9	0.0225021
		261.04	0.0225803
		261.18	0.022654
		261.32	0.0227233
		261.46	0.022788
		261.6	0.022848
		261.74	0.0229032
		261.88	0.0229535
		262.02	0.0229989
		262.16	0.0230393
		262.3	0.0230745
		262.44	0.0231046
		262.58	0.0231295
		262.72	0.0231491
		262.86	0.0231634
		263	0.0231723
		263.14	0.0231758
		263.28	0.0231739
		263.42	0.0231665
		263.56	0.0231537
		263.7	0.0231354
		263.84	0.0231116
		263.98	0.0230824
		264.12	0.0230477
		264.26	0.0230076
		264.4	0.022962
		264.54	0.022911
		264.68	0.0228547
		264.82	0.0227931
		264.96	0.0227263
		265.1	0.0226542
		265.24	0.022577
		265.38	0.0224947
		265.52	0.0224075
		265.66	0.0223153
		265.8	0.0222183
		265.94	0.0221165
		266.08	0.0220102
		266.22	0.0218993
		266.36	0.0217839
		266.5	0.0216643
		266.64	0.0215404
		266.78	0.0214125
		266.92	0.0212806
		267.06	0.0211449
		267.2	0.0210054
		267.34	0.0208624
		267.48	0.020716
		267.62	0.0205662
		267.76	0.0204133
		267.9	0.0202573
		268.04	0.0200985
		268.18	0.0199369
		268.32	0.0197727
		268.46	0.019606
		268.6	0.0194369
		268.74	0.0192656
		268.88	0.0190923
		269.02	0.018917
		269.16	0.0187399
		269.3	0.0185611
		269.44	0.0183808
		269.58	0.018199
		269.72	0.0180159
		269.86	0.0178316
		270	0.0176462
		270.14	0.0174598
		270.28	0.0172726
		270.42	0.0170846
		270.56	0.0168959
		270.7	0.0167067
		270.84	0.0165171
		270.98	0.016327
		271.12	0.0161367
		271.26	0.0159461
		271.4	0.0157555
		271.54	0.0155648
		271.68	0.0153742
		271.82	0.0151837
		271.96	0.0149933
		272.1	0.0148033
		272.24	0.0146135
		272.38	0.0144242
		272.52	0.0142353
		272.66	0.0140469
		272.8	0.0138592
		272.94	0.013672
		273.08	0.0134856
		273.22	0.0132999
		273.36	0.0131151
		273.5	0.0129311
		273.64	0.0127481
		273.78	0.012566
		273.92	0.0123851
		274.06	0.0122052
		274.2	0.0120264
		274.34	0.0118489
		274.48	0.0116727
		274.62	0.0114977
		274.76	0.0113242
		274.9	0.0111521
		275.04	0.0109815
		275.18	0.0108125
		275.32	0.010645
		275.46	0.0104793
		275.6	0.0103152
		275.74	0.010153
		275.88	0.00999252
		276.02	0.00983398
		276.16	0.0096774
		276.3	0.00952281
		276.44	0.00937028
		276.58	0.00921986
		276.72	0.00907161
		276.86	0.00892557
		277	0.00878179
		277.14	0.00864033
		277.28	0.00850122
		277.42	0.00836452
		277.56	0.00823026
		277.7	0.00809849
		277.84	0.00796926
		277.98	0.00784258
		278.12	0.00771849
		278.26	0.00759704
		278.4	0.00747824
		278.54	0.00736211
		278.68	0.00724869
		278.82	0.00713799
		278.96	0.00703002
		279.1	0.00692479
		279.24	0.00682232
		279.38	0.00672261
		279.52	0.00662566
		279.66	0.00653148
		279.8	0.00644004
		279.94	0.00635135
		280.08	0.00626539
		280.22	0.00618215
		280.36	0.00610161
		280.5	0.00602374
		280.64	0.00594853
		280.78	0.00587594
		280.92	0.00580593
		281.06	0.00573849
		281.2	0.00567357
		281.34	0.00561113
		281.48	0.00555113
		281.62	0.00549353
		281.76	0.00543828
		281.9	0.00538532
		282.04	0.00533463
		282.18	0.00528614
		282.32	0.00523981
		282.46	0.00519557
		282.6	0.00515339
		282.74	0.0051132
		282.88	0.00507494
		283.02	0.00503857
		283.16	0.00500402
		283.3	0.00497125
		283.44	0.0049402
		283.58	0.00491081
		283.72	0.00488303
		283.86	0.0048568
		284	0.00483208
		284.14	0.00480883
		284.28	0.00478697
		284.42	0.00476647
		284.56	0.00474729
		284.7	0.00472937
		284.84	0.00471267
		284.98	0.00469715
		285.12	0.00468279
		285.26	0.00466952
		285.4	0.00465732
		285.54	0.00464616
		285.68	0.00463601
		285.82	0.00462683
		285.96	0.0046186
		286.1	0.00461131
		286.24	0.00460492
		286.38	0.00459942
		286.52	0.00459479
		286.66	0.00459101
		286.8	0.00458808
		286.94	0.00458599
		287.08	0.00458472
		287.22	0.00458427
		287.36	0.00458464
		287.5	0.00458582
		287.64	0.00458783
		287.78	0.00459066
		287.92	0.00459431
		288.06	0.0045988
		288.2	0.00460412
		288.34	0.00461031
		288.48	0.00461736
		288.62	0.00462528
		288.76	0.00463409
		288.9	0.00464381
		289.04	0.00465446
		289.18	0.00466604
		289.32	0.00467858
		289.46	0.00469209
		289.6	0.00470659
		289.74	0.00472209
		289.88	0.00473862
		290.02	0.0047562
		290.16	0.00477483
		290.3	0.00479452
		290.44	0.00481531
		290.58	0.00483721
		290.72	0.00486021
		290.86	0.00488433
		291	0.00490957
		291.14	0.00493596
		291.28	0.00496348
		291.42	0.00499213
		291.56	0.00502192
		291.7	0.00505283
		291.84	0.00508486
		291.98	0.00511799
		292.12	0.00515222
		292.26	0.00518751
		292.4	0.00522386
		292.54	0.00526122
		292.68	0.00529957
		292.82	0.00533888
		292.96	0.0053791
		293.1	0.0054202
		293.24	0.00546212
		293.38	0.00550482
		293.52	0.00554824
		293.66	0.00559233
		293.8	0.00563702
		293.94	0.00568226
		294.08	0.00572796
		294.22	0.00577406
		294.36	0.00582049
		294.5	0.00586717
		294.64	0.00591403
		294.78	0.00596099
		294.92	0.00600796
		295.06	0.00605487
		295.2	0.00610163
		295.34	0.00614817
		295.48	0.0061944
		295.62	0.00624025
		295.76	0.00628562
		295.9	0.00633045
		296.04	0.00637465
		296.18	0.00641816
		296.32	0.00646089
		296.46	0.0065028
		296.6	0.0065438
		296.74	0.00658383
		296.88	0.00662284
		297.02	0.00666077
		297.16	0.00669758
		297.3	0.00673322
		297.44	0.00676765
		297.58	0.00680084
		297.72	0.00683276
		297.86	0.00686338
		298	0.00689269
		298.14	0.00692066
		298.28	0.0069473
		298.42	0.00697259
		298.56	0.00699655
		298.7	0.00701917
		298.84	0.00704046
		298.98	0.00706045
		299.12	0.00707915
		299.26	0.00709659
		299.4	0.0071128
		299.54	0.0071278
		299.68	0.00714164
		299.82	0.00715436
		299.96	0.00716598
		300.1	0.00717657
		300.24	0.00718616
		300.38	0.0071948
		300.52	0.00720255
		300.66	0.00720945
		300.8	0.00721555
		300.94	0.0072209
		301.08	0.00722557
		301.22	0.0072296
		301.36	0.00723305
		301.5	0.00723596
		301.64	0.00723839
		301.78	0.00724039
		301.92	0.007242
		302.06	0.00724329
		302.2	0.00724428
		302.34	0.00724504
		302.48	0.0072456
		302.62	0.007246
		302.76	0.00724627
		302.9	0.00724647
		303.04	0.00724662
		303.18	0.00724675
		303.32	0.00724689
		303.46	0.00724707
		303.6	0.00724732
		303.74	0.00724766
		303.88	0.0072481
		304.02	0.00724867
		304.16	0.00724937
		304.3	0.00725023
		304.44	0.00725125
		304.58	0.00725243
		304.72	0.00725378
		304.86	0.00725529
		305	0.00725698
		305.14	0.00725884
		305.28	0.00726086
		305.42	0.00726303
		305.56	0.00726534
		305.7	0.00726779
		305.84	0.00727035
		305.98	0.007273
		306.12	0.00727574
		306.26	0.00727853
		306.4	0.00728136
		306.54	0.00728419
		306.68	0.007287
		306.82	0.00728976
		306.96	0.00729244
		307.1	0.00729502
		307.24	0.00729745
		307.38	0.0072997
		307.52	0.00730173
		307.66	0.00730351
		307.8	0.00730499
		307.94	0.00730614
		308.08	0.00730692
		308.22	0.00730729
		308.36	0.0073072
		308.5	0.00730662
		308.64	0.0073055
		308.78	0.0073038
		308.92	0.00730147
		309.06	0.00729848
		309.2	0.00729479
		309.34	0.00729035
		309.48	0.00728513
		309.62	0.00727909
		309.76	0.00727218
		309.9	0.00726438
		310.04	0.00725564
		310.18	0.00724595
		310.32	0.00723525
		310.46	0.00722353
		310.6	0.00721077
		310.74	0.00719692
		310.88	0.00718198
		311.02	0.00716593
		311.16	0.00714874
		311.3	0.0071304
		311.44	0.00711091
		311.58	0.00709025
		311.72	0.00706842
		311.86	0.00704542
		312	0.00702126
		312.14	0.00699592
		312.28	0.00696944
		312.42	0.0069418
		312.56	0.00691304
		312.7	0.00688316
		312.84	0.00685219
		312.98	0.00682016
		313.12	0.00678709
		313.26	0.00675302
		313.4	0.00671796
		313.54	0.00668197
		313.68	0.00664508
		313.82	0.00660732
		313.96	0.00656876
		314.1	0.00652942
		314.24	0.00648936
		314.38	0.00644863
		314.52	0.00640727
		314.66	0.00636534
		314.8	0.00632288
		314.94	0.00627996
		315.08	0.00623664
		315.22	0.00619296
		315.36	0.00614898
		315.5	0.00610476
		315.64	0.00606034
		315.78	0.0060158
		315.92	0.00597117
		316.06	0.00592652
		316.2	0.00588189
		316.34	0.00583735
		316.48	0.00579293
		316.62	0.00574869
		316.76	0.00570468
		316.9	0.00566094
		317.04	0.00561752
		317.18	0.00557445
		317.32	0.00553178
		317.46	0.00548954
		317.6	0.00544778
		317.74	0.00540652
		317.88	0.00536579
		318.02	0.00532562
		318.16	0.00528605
		318.3	0.00524708
		318.44	0.00520876
		318.58	0.00517109
		318.72	0.00513409
		318.86	0.00509778
		319	0.00506217
		319.14	0.00502727
		319.28	0.00499308
		319.42	0.00495961
		319.56	0.00492688
		319.7	0.00489488
		319.84	0.00486361
		319.98	0.00483307
		320.12	0.00480326
		320.26	0.00477418
		320.4	0.00474581
		320.54	0.00471816
		320.68	0.00469121
		320.82	0.00466496
		320.96	0.00463939
		321.1	0.0046145
		321.24	0.00459027
		321.38	0.0045667
		321.52	0.00454377
		321.66	0.00452146
		321.8	0.00449977
		321.94	0.00447868
		322.08	0.00445817
		322.22	0.00443824
		322.36	0.00441887
		322.5	0.00440004
		322.64	0.00438174
		322.78	0.00436396
		322.92	0.00434667
		323.06	0.00432988
		323.2	0.00431356
		323.34	0.0042977
		323.48	0.00428229
		323.62	0.00426732
		323.76	0.00425277
		323.9	0.00423863
		324.04	0.00422489
		324.18	0.00421154
		324.32	0.00419857
		324.46	0.00418596
		324.6	0.0041737
		324.74	0.0041618
		324.88	0.00415023
		325.02	0.00413898
		325.16	0.00412805
		325.3	0.00411743
		325.44	0.00410711
		325.58	0.00409708
		325.72	0.00408733
		325.86	0.00407786
		326	0.00406865
		326.14	0.00405971
		326.28	0.00405101
		326.42	0.00404256
		326.56	0.00403435
		326.7	0.00402637
		326.84	0.00401861
		326.98	0.00401108
		327.12	0.00400375
		327.26	0.00399662
		327.4	0.0039897
		327.54	0.00398296
		327.68	0.00397641
		327.82	0.00397003
		327.96	0.00396383
		328.1	0.00395779
		328.24	0.00395191
		328.38	0.00394618
		328.52	0.00394059
		328.66	0.00393514
		328.8	0.00392983
		328.94	0.00392463
		329.08	0.00391956
		329.22	0.00391459
		329.36	0.00390973
		329.5	0.00390496
		329.64	0.00390028
		329.78	0.00389569
		329.92	0.00389116
		330.06	0.0038867
		330.2	0.00388231
		330.34	0.00387797
		330.48	0.00387367
		330.62	0.00386941
		330.76	0.00386517
		330.9	0.00386096
		331.04	0.00385676
		331.18	0.00385258
		331.32	0.00384839
		331.46	0.00384419
		331.6	0.00383998
		331.74	0.00383574
		331.88	0.00383148
		332.02	0.00382717
		332.16	0.00382282
		332.3	0.00381842
		332.44	0.00381395
		332.58	0.00380942
		332.72	0.0038048
		332.86	0.00380011
		333	0.00379532
		333.14	0.00379044
		333.28	0.00378546
		333.42	0.00378036
		333.56	0.00377514
		333.7	0.0037698
		333.84	0.00376432
		333.98	0.00375872
		334.12	0.00375297
		334.26	0.00374707
		334.4	0.00374101
		334.54	0.0037348
		334.68	0.00372842
		334.82	0.00372186
		334.96	0.00371514
		335.1	0.00370823
		335.24	0.00370113
		335.38	0.00369384
		335.52	0.00368637
		335.66	0.0036787
		335.8	0.00367082
		335.94	0.00366275
		336.08	0.00365447
		336.22	0.00364599
		336.36	0.00363729
		336.5	0.00362839
		336.64	0.00361926
		336.78	0.00360993
		336.92	0.00360039
		337.06	0.00359063
		337.2	0.00358066
		337.34	0.00357048
		337.48	0.00356008
		337.62	0.00354948
		337.76	0.00353867
		337.9	0.00352765
		338.04	0.00351643
		338.18	0.00350501
		338.32	0.00349339
		338.46	0.00348158
		338.6	0.00346958
		338.74	0.00345739
		338.88	0.00344502
		339.02	0.00343248
		339.16	0.00341976
		339.3	0.00340688
		339.44	0.00339384
		339.58	0.00338065
		339.72	0.0033673
		339.86	0.00335382
		340	0.0033402
		340.14	0.00332646
		340.28	0.00331259
		340.42	0.00329861
		340.56	0.00328452
		340.7	0.00327033
		340.84	0.00325604
		340.98	0.00324167
		341.12	0.00322723
		341.26	0.00321271
		341.4	0.00319812
		341.54	0.00318348
		341.68	0.00316879
		341.82	0.00315406
		341.96	0.00313929
		342.1	0.00312448
		342.24	0.00310966
		342.38	0.00309482
		342.52	0.00307996
		342.66	0.00306509
		342.8	0.00305023
		342.94	0.00303537
		343.08	0.00302052
		343.22	0.00300568
		343.36	0.00299086
		343.5	0.00297606
		343.64	0.00296129
		343.78	0.00294655
		343.92	0.00293183
		344.06	0.00291715
		344.2	0.0029025
		344.34	0.00288789
		344.48	0.00287332
		344.62	0.00285879
		344.76	0.00284431
		344.9	0.00282985
		345.04	0.00281545
		345.18	0.00280108
		345.32	0.00278676
		345.46	0.00277247
		345.6	0.00275822
		345.74	0.002744
		345.88	0.00272983
		346.02	0.00271569
		346.16	0.00270157
		346.3	0.00268749
		346.44	0.00267344
		346.58	0.0026594
		346.72	0.00264539
		346.86	0.0026314
		347	0.00261743
		347.14	0.00260347
		347.28	0.00258952
		347.42	0.00257558
		347.56	0.00256165
		347.7	0.00254772
		347.84	0.00253378
		347.98	0.00251985
		348.12	0.00250591
		348.26	0.00249196
		348.4	0.00247801
		348.54	0.00246404
		348.68	0.00245006
		348.82	0.00243606
		348.96	0.00242205
		349.1	0.00240801
		349.24	0.00239396
		349.38	0.00237989
		349.52	0.0023658
		349.66	0.00235168
		349.8	0.00233755
		349.94	0.00232339
		350.08	0.00230922
		350.22	0.00229502
		350.36	0.0022808
		350.5	0.00226657
		350.64	0.00225231
		350.78	0.00223804
		350.92	0.00222376
		351.06	0.00220947
		351.2	0.00219516
		351.34	0.00218085
		351.48	0.00216653
		351.62	0.00215221
		351.76	0.0021379
		351.9	0.00212358
		352.04	0.00210927
		352.18	0.00209497
		352.32	0.00208068
		352.46	0.00206641
		352.6	0.00205216
		352.74	0.00203794
		352.88	0.00202374
		353.02	0.00200956
		353.16	0.00199543
		353.3	0.00198132
		353.44	0.00196726
		353.58	0.00195324
		353.72	0.00193927
		353.86	0.00192534
		354	0.00191147
		354.14	0.00189765
		354.28	0.0018839
		354.42	0.0018702
		354.56	0.00185656
		354.7	0.00184299
		354.84	0.00182949
		354.98	0.00181605
		355.12	0.00180269
		355.26	0.0017894
		355.4	0.00177618
		355.54	0.00176304
		355.68	0.00174997
		355.82	0.00173698
		355.96	0.00172406
		356.1	0.00171123
		356.24	0.00169847
		356.38	0.00168579
		356.52	0.00167319
		356.66	0.00166066
		356.8	0.00164821
		356.94	0.00163583
		357.08	0.00162353
		357.22	0.00161131
		357.36	0.00159916
		357.5	0.00158708
		357.64	0.00157506
		357.78	0.00156312
		357.92	0.00155125
		358.06	0.00153944
		358.2	0.0015277
		358.34	0.00151601
		358.48	0.00150439
		358.62	0.00149282
		358.76	0.00148131
		358.9	0.00146986
		359.04	0.00145845
		359.18	0.0014471
		359.32	0.00143579
		359.46	0.00142453
		359.6	0.00141331
		359.74	0.00140214
		359.88	0.00139101
		360.02	0.00137991
		360.16	0.00136886
		360.3	0.00135783
		360.44	0.00134685
		360.58	0.00133589
		360.72	0.00132497
		360.86	0.00131408
		361	0.00130322
		361.14	0.00129238
		361.28	0.00128158
		361.42	0.0012708
		361.56	0.00126004
		361.7	0.00124932
		361.84	0.00123862
		361.98	0.00122794
		362.12	0.00121729
		362.26	0.00120667
		362.4	0.00119607
		362.54	0.0011855
		362.68	0.00117495
		362.82	0.00116443
		362.96	0.00115394
		363.1	0.00114348
		363.24	0.00113305
		363.38	0.00112265
		363.52	0.00111229
		363.66	0.00110195
		363.8	0.00109165
		363.94	0.00108139
		364.08	0.00107116
		364.22	0.00106097
		364.36	0.00105083
		364.5	0.00104072
		364.64	0.00103065
		364.78	0.00102064
		364.92	0.00101066
		365.06	0.00100074
		365.2	0.000990863
		365.34	0.00098104
		365.48	0.00097127
		365.62	0.000961551
		365.76	0.000951891
		365.9	0.000942289
		366.04	0.000932746
		366.18	0.000923263
		366.32	0.000913842
		366.46	0.000904481
		366.6	0.000895188
		366.74	0.000885959
		366.88	0.000876799
		367.02	0.000867708
		367.16	0.000858686
		367.3	0.000849734
		367.44	0.000840854
		367.58	0.000832045
		367.72	0.00082331
		367.86	0.000814645
		368	0.000806058
		368.14	0.000797545
		368.28	0.000789108
		368.42	0.000780747
		368.56	0.000772462
		368.7	0.000764253
		368.84	0.000756121
		368.98	0.000748066
		369.12	0.000740087
		369.26	0.00073218
		369.4	0.000724357
		369.54	0.00071661
		369.68	0.00070894
		369.82	0.000701347
		369.96	0.00069383
		370.1	0.00068639
		370.24	0.000679026
		370.38	0.000671738
		370.52	0.000664526
		370.66	0.000657391
		370.8	0.00065033
		370.94	0.000643342
		371.08	0.00063643
		371.22	0.000629591
		371.36	0.000622824
		371.5	0.000616133
		371.64	0.000609515
		371.78	0.000602971
		371.92	0.000596499
		372.06	0.000590099
		372.2	0.000583772
		372.34	0.000577517
		372.48	0.000571334
		372.62	0.000565223
		372.76	0.000559184
		372.9	0.000553216
		373.04	0.00054732
		373.18	0.000541495
		373.32	0.000535742
		373.46	0.000530057
		373.6	0.000524448
		373.74	0.00051891
		373.88	0.000513444
		374.02	0.000508047
		374.16	0.000502725
		374.3	0.000497476
		374.44	0.000492299
		374.58	0.000487195
		374.72	0.000482163
		374.86	0.000477204
		375	0.000472319
		375.14	0.000467507
		375.28	0.000462768
		375.42	0.000458104
		375.56	0.000453513
		375.7	0.000448996
		375.84	0.000444553
		375.98	0.000440185
		376.12	0.00043589
		376.26	0.00043167
		376.4	0.000427524
		376.54	0.000423452
		376.68	0.000419454
		376.82	0.000415529
		376.96	0.000411678
		377.1	0.0004079
		377.24	0.000404194
		377.38	0.000400561
		377.52	0.000396999
		377.66	0.000393509
		377.8	0.000390088
		377.94	0.000386737
		378.08	0.000383454
		378.22	0.000380239
		378.36	0.000377091
		378.5	0.000374008
		378.64	0.000370989
		378.78	0.000368032
		378.92	0.000365138
		379.06	0.0003623
		379.2	0.000359523
		379.34	0.000356803
		379.48	0.000354137
		379.62	0.000351525
		379.76	0.000348964
		379.9	0.000346451
		380.04	0.000343986
		380.18	0.000341565
		380.32	0.000339184
		380.46	0.000336846
		380.6	0.000334544
		380.74	0.000332279
		380.88	0.000330048
		381.02	0.000327848
		381.16	0.000325675
		381.3	0.000323528
		381.44	0.000321404
		381.58	0.0003193
		381.72	0.000317214
		381.86	0.000315143
		382	0.000313084
		382.14	0.000311035
		382.28	0.000308994
		382.42	0.000306957
		382.56	0.00030492
		382.7	0.000302885
		382.84	0.000300847
		382.98	0.000298804
		383.12	0.000296753
		383.26	0.000294692
		383.4	0.000292619
		383.54	0.000290529
		383.68	0.000288425
		383.82	0.000286302
		383.96	0.000284159
		384.1	0.000281994
		384.24	0.000279804
		384.38	0.000277589
		384.52	0.000275347
		384.66	0.000273075
		384.8	0.000270774
		384.94	0.000268442
		385.08	0.000266077
		385.22	0.000263679
		385.36	0.000261247
		385.5	0.00025878
		385.64	0.000256278
		385.78	0.00025374
		385.92	0.000251166
		386.06	0.000248555
		386.2	0.000245909
		386.34	0.000243229
		386.48	0.00024051
		386.62	0.000237755
		386.76	0.000234965
		386.9	0.00023214
		387.04	0.000229281
		387.18	0.000226389
		387.32	0.000223461
		387.46	0.000220505
		387.6	0.000217519
		387.74	0.000214503
		387.88	0.00021146
		388.02	0.000208388
		388.16	0.000205294
		388.3	0.000202177
		388.44	0.000199038
		388.58	0.000195879
		388.72	0.000192702
		388.86	0.000189509
		389	0.000186301
		389.14	0.000183082
		389.28	0.000179852
		389.42	0.000176611
		389.56	0.000173367
		389.7	0.000170119
		389.84	0.000166869
		389.98	0.000163619
		390.12	0.000160372
		390.26	0.000157129
		390.4	0.000153894
		390.54	0.000150664
		390.68	0.000147448
		390.82	0.000144246
		390.96	0.000141056
		391.1	0.000137887
		391.24	0.000134738
		391.38	0.000131607
		391.52	0.000128503
		391.66	0.000125421
		391.8	0.00012237
		391.94	0.000119348
		392.08	0.000116357
		392.22	0.000113402
		392.36	0.000110476
		392.5	0.000107589
		392.64	0.00010474
		392.78	0.00010193
		392.92	9.91605e-05
		393.06	9.64331e-05
		393.2	9.37488e-05
		393.34	9.11091e-05
		393.48	8.85149e-05
		393.62	8.59674e-05
		393.76	8.34675e-05
		393.9	8.10162e-05
		394.04	7.86143e-05
		394.18	7.62626e-05
		394.32	7.39617e-05
		394.46	7.17122e-05
		394.6	6.95148e-05
		394.74	6.73698e-05
		394.88	6.52776e-05
		395.02	6.32387e-05
		395.16	6.12504e-05
		395.3	5.93187e-05
		395.44	5.74408e-05
		395.58	5.56167e-05
		395.72	5.38465e-05
		395.86	5.213e-05
		396	5.04672e-05
		396.14	4.88578e-05
		396.28	4.73018e-05
		396.42	4.57987e-05
		396.56	4.43483e-05
		396.7	4.29503e-05
		396.84	4.16042e-05
		396.98	4.03095e-05
		397.12	3.90659e-05
		397.26	3.78728e-05
		397.4	3.67296e-05
		397.54	3.56358e-05
		397.68	3.45908e-05
		397.82	3.35939e-05
		397.96	3.26445e-05
		398.1	3.17391e-05
		398.24	3.08829e-05
		398.38	3.00721e-05
		398.52	2.93061e-05
		398.66	2.85841e-05
		398.8	2.79054e-05
		398.94	2.72693e-05
		399.08	2.66749e-05
		399.22	2.61217e-05
		399.36	2.56089e-05
		399.5	2.51356e-05
		399.64	2.47013e-05
		399.78	2.43052e-05
		399.92	2.39465e-05
		400.06	2.36246e-05
		400.2	2.33388e-05
		400.34	2.30884e-05
		400.48	2.28728e-05
		400.62	2.26912e-05
		400.76	2.25431e-05
		400.9	2.24279e-05
		401.04	2.23449e-05
		401.18	2.22935e-05
		401.32	2.22733e-05
		401.46	2.22837e-05
		401.6	2.23213e-05
		401.74	2.23916e-05
		401.88	2.2491e-05
		402.02	2.26191e-05
		402.16	2.27754e-05
		402.3	2.29595e-05
		402.44	2.31711e-05
		402.58	2.34099e-05
		402.72	2.36754e-05
		402.86	2.39675e-05
		403	2.42858e-05
		403.14	2.46301e-05
		403.28	2.50003e-05
		403.42	2.5396e-05
		403.56	2.58172e-05
		403.7	2.62637e-05
		403.84	2.67355e-05
		403.98	2.72323e-05
		404.12	2.77542e-05
		404.26	2.83011e-05
		404.4	2.8873e-05
		404.54	2.94699e-05
		404.68	3.00918e-05
		404.82	3.07389e-05
		404.96	3.14112e-05
		405.1	3.21087e-05
		405.24	3.28317e-05
		405.38	3.35802e-05
		405.52	3.43545e-05
		405.66	3.51547e-05
		405.8	3.5981e-05
		405.94	3.68337e-05
		406.08	3.7713e-05
		406.22	3.86192e-05
		406.36	3.95525e-05
		406.5	4.05133e-05
		406.64	4.15019e-05
		406.78	4.25186e-05
		406.92	4.35637e-05
		407.06	4.46376e-05
		407.2	4.57407e-05
		407.34	4.68734e-05
		407.48	4.8036e-05
		407.62	4.9229e-05
		407.76	5.04527e-05
		407.9	5.17077e-05
		408.04	5.29943e-05
		408.18	5.4313e-05
		408.32	5.56642e-05
		408.46	5.70483e-05
		408.6	5.84659e-05
		408.74	5.99173e-05
		408.88	6.14031e-05
		409.02	6.29236e-05
		409.16	6.44794e-05
		409.3	6.60709e-05
		409.44	6.76957e-05
		409.58	6.93601e-05
		409.72	7.10616e-05
		409.86	7.28005e-05
		410	7.45773e-05
		410.14	7.63923e-05
		410.28	7.82461e-05
		410.42	8.0139e-05
		410.56	8.20714e-05
		410.7	8.40436e-05
		410.84	8.60561e-05
		410.98	8.81091e-05
		411.12	9.02029e-05
		411.26	9.23379e-05
		411.4	9.45144e-05
		411.54	9.67325e-05
		411.68	9.89925e-05
		411.82	0.000101295
		411.96	0.000103639
		412.1	0.000106026
		412.24	0.000108455
		412.38	0.000110927
		412.52	0.000113442
		412.66	0.000115999
		412.8	0.000118599
		412.94	0.000121242
		413.08	0.000123927
		413.22	0.000126654
		413.36	0.000129424
		413.5	0.000132235
		413.64	0.000135088
		413.78	0.000137983
		413.92	0.000140919
		414.06	0.000143895
		414.2	0.000146911
		414.34	0.000149967
		414.48	0.000153059
		414.62	0.000156193
		414.76	0.000159364
		414.9	0.000162573
		415.04	0.000165818
		415.18	0.000169098
		415.32	0.000172413
		415.46	0.000175762
		415.6	0.000179143
		415.74	0.000182556
		415.88	0.000185999
		416.02	0.000189472
		416.16	0.000192972
		416.3	0.0001965
		416.44	0.00020005
		416.58	0.000203627
		416.72	0.000207227
		416.86	0.000210848
		417	0.000214488
		417.14	0.000218146
		417.28	0.000221821
		417.42	0.00022551
		417.56	0.000229212
		417.7	0.000232924
		417.84	0.000236646
		417.98	0.000240375
		418.12	0.000244109
		418.26	0.000247845
		418.4	0.00025158
		418.54	0.000255317
		418.68	0.00025905
		418.82	0.000262778
		418.96	0.000266498
		419.1	0.000270208
		419.24	0.000273906
		419.38	0.000277589
		419.52	0.000281255
		419.66	0.000284901
		419.8	0.000288526
		419.94	0.000292126
		420.08	0.0002957
		420.22	0.000299245
		420.36	0.000302758
		420.5	0.000306236
		420.64	0.000309678
		420.78	0.000313081
		420.92	0.000316443
		421.06	0.00031976
		421.2	0.000323031
		421.34	0.000326253
		421.48	0.000329423
		421.62	0.000332539
		421.76	0.0003356
		421.9	0.000338601
		422.04	0.000341541
		422.18	0.000344418
		422.32	0.00034723
		422.46	0.000349973
		422.6	0.000352646
		422.74	0.000355247
		422.88	0.000357774
		423.02	0.000360224
		423.16	0.000362596
		423.3	0.000364887
		423.44	0.000367096
		423.58	0.00036922
		423.72	0.000371259
		423.86	0.000373209
		424	0.000375071
		424.14	0.000376842
		424.28	0.00037852
		424.42	0.000380105
		424.56	0.000381594
		424.7	0.000382987
		424.84	0.000384283
		424.98	0.00038548
		425.12	0.000386578
		425.26	0.000387575
		425.4	0.000388471
		425.54	0.000389264
		425.68	0.000389956
		425.82	0.000390544
		425.96	0.000391028
		426.1	0.000391409
		426.24	0.000391685
		426.38	0.000391857
		426.52	0.000391925
		426.66	0.000391888
		426.8	0.000391747
		426.94	0.000391502
		427.08	0.000391154
		427.22	0.000390702
		427.36	0.000390147
		427.5	0.00038949
		427.64	0.000388732
		427.78	0.000387873
		427.92	0.000386914
		428.06	0.000385856
		428.2	0.0003847
		428.34	0.000383448
		428.48	0.000382099
		428.62	0.000380657
		428.76	0.000379122
		428.9	0.000377495
		429.04	0.000375778
		429.18	0.000373972
		429.32	0.00037208
		429.46	0.000370103
		429.6	0.000368042
		429.74	0.0003659
		429.88	0.000363678
		430.02	0.000361378
		430.16	0.000359002
		430.3	0.000356553
		430.44	0.000354032
		430.58	0.000351441
		430.72	0.000348783
		430.86	0.000346059
		431	0.000343272
		431.14	0.000340425
		431.28	0.000337519
		431.42	0.000334556
		431.56	0.00033154
		431.7	0.000328472
		431.84	0.000325354
		431.98	0.00032219
		432.12	0.00031898
		432.26	0.000315729
		432.4	0.000312437
		432.54	0.000309108
		432.68	0.000305743
		432.82	0.000302346
		432.96	0.000298917
		433.1	0.000295461
		433.24	0.000291978
		433.38	0.000288471
		433.52	0.000284943
		433.66	0.000281396
		433.8	0.000277831
		433.94	0.000274252
		434.08	0.00027066
		434.22	0.000267057
		434.36	0.000263445
		434.5	0.000259827
		434.64	0.000256204
		434.78	0.000252579
		434.92	0.000248953
		435.06	0.000245328
		435.2	0.000241707
		435.34	0.00023809
		435.48	0.00023448
		435.62	0.000230878
		435.76	0.000227287
		435.9	0.000223706
		436.04	0.00022014
		436.18	0.000216588
		436.32	0.000213052
		436.46	0.000209533
		436.6	0.000206034
		436.74	0.000202555
		436.88	0.000199098
		437.02	0.000195663
		437.16	0.000192253
		437.3	0.000188867
		437.44	0.000185508
		437.58	0.000182176
		437.72	0.000178873
		437.86	0.000175598
		438	0.000172353
		438.14	0.00016914
		438.28	0.000165958
		438.42	0.000162808
		438.56	0.000159691
		438.7	0.000156608
		438.84	0.000153559
		438.98	0.000150545
		439.12	0.000147567
		439.26	0.000144624
		439.4	0.000141718
		439.54	0.000138848
		439.68	0.000136015
		439.82	0.000133219
		439.96	0.000130461
		440.1	0.000127741
		440.24	0.000125059
		440.38	0.000122415
		440.52	0.00011981
		440.66	0.000117242
		440.8	0.000114714
		440.94	0.000112223
		441.08	0.000109772
		441.22	0.000107359
		441.36	0.000104984
		441.5	0.000102648
		441.64	0.00010035
		441.78	9.80897e-05
		441.92	9.58679e-05
		442.06	9.3684e-05
		442.2	9.15378e-05
		442.34	8.94291e-05
		442.48	8.73577e-05
		442.62	8.53233e-05
		442.76	8.33257e-05
		442.9	8.13645e-05
		443.04	7.94396e-05
		443.18	7.75505e-05
		443.32	7.56971e-05
		443.46	7.38789e-05
		443.6	7.20956e-05
		443.74	7.03469e-05
		443.88	6.86324e-05
		444.02	6.69517e-05
		444.16	6.53045e-05
		444.3	6.36904e-05
		444.44	6.21089e-05
		444.58	6.05597e-05
		444.72	5.90423e-05
		444.86	5.75564e-05
		445	5.61016e-05
		445.14	5.46773e-05
		445.28	5.32833e-05
		445.42	5.1919e-05
		445.56	5.0584e-05
		445.7	4.9278e-05
		445.84	4.80004e-05
		445.98	4.67508e-05
		446.12	4.55289e-05
		446.26	4.43341e-05
		446.4	4.3166e-05
		446.54	4.20242e-05
		446.68	4.09083e-05
		446.82	3.98177e-05
		446.96	3.87522e-05
		447.1	3.77113e-05
		447.24	3.66944e-05
		447.38	3.57013e-05
		447.52	3.47315e-05
		447.66	3.37845e-05
		447.8	3.286e-05
		447.94	3.19575e-05
		448.08	3.10766e-05
		448.22	3.02169e-05
		448.36	2.9378e-05
		448.5	2.85595e-05
		448.64	2.77611e-05
		448.78	2.69822e-05
		448.92	2.62226e-05
		449.06	2.54819e-05
		449.2	2.47596e-05
		449.34	2.40553e-05
		449.48	2.33688e-05
		449.62	2.26997e-05
		449.76	2.20475e-05
		449.9	2.1412e-05
		450.04	2.07928e-05
		450.18	2.01895e-05
		450.32	1.96018e-05
		450.46	1.90294e-05
		450.6	1.84719e-05
		450.74	1.7929e-05
		450.88	1.74003e-05
		451.02	1.68857e-05
		451.16	1.63847e-05
		451.3	1.5897e-05
		451.44	1.54224e-05
		451.58	1.49605e-05
		451.72	1.45111e-05
		451.86	1.40738e-05
		452	1.36484e-05
		452.14	1.32346e-05
		452.28	1.28322e-05
		452.42	1.24408e-05
		452.56	1.20602e-05
		452.7	1.16902e-05
		452.84	1.13305e-05
		452.98	1.09808e-05
		453.12	1.06409e-05
		453.26	1.03105e-05
		453.4	9.98952e-06
		453.54	9.6776e-06
		453.68	9.37455e-06
		453.82	9.08016e-06
		453.96	8.79419e-06
		454.1	8.51644e-06
		454.24	8.24671e-06
		454.38	7.98478e-06
		454.52	7.73047e-06
		454.66	7.48356e-06
		454.8	7.24388e-06
		454.94	7.01123e-06
		455.08	6.78543e-06
		455.22	6.5663e-06
		455.36	6.35367e-06
		455.5	6.14737e-06
		455.64	5.94722e-06
		455.78	5.75306e-06
		455.92	5.56473e-06
		456.06	5.38209e-06
		456.2	5.20496e-06
		456.34	5.0332e-06
		456.48	4.86667e-06
		456.62	4.70523e-06
		456.76	4.54872e-06
		456.9	4.39702e-06
		457.04	4.25e-06
		457.18	4.10752e-06
		457.32	3.96946e-06
		457.46	3.83569e-06
		457.6	3.70609e-06
		457.74	3.58054e-06
		457.88	3.45894e-06
		458.02	3.34116e-06
		458.16	3.2271e-06
		458.3	3.11665e-06
		458.44	3.0097e-06
		458.58	2.90616e-06
		458.72	2.80593e-06
		458.86	2.70891e-06
		459	2.615e-06
		459.14	2.52412e-06
		459.28	2.43617e-06
		459.42	2.35107e-06
		459.56	2.26874e-06
		459.7	2.1863e-06
		459.84	2.10949e-06
		459.98	2.03519e-06
		460.12	1.96332e-06
		460.26	1.8938e-06
		460.4	1.82657e-06
		460.54	1.76156e-06
		460.68	1.6987e-06
		460.82	1.63793e-06
		460.96	1.57918e-06
		461.1	1.52239e-06
		461.24	1.4675e-06
		461.38	1.41445e-06
		461.52	1.36319e-06
		461.66	1.31366e-06
		461.8	1.26581e-06
		461.94	1.21959e-06
		462.08	1.17493e-06
		462.22	1.13181e-06
		462.36	1.09015e-06
		462.5	1.04993e-06
		462.64	1.0111e-06
		462.78	9.73603e-07
		462.92	9.37406e-07
		463.06	9.02466e-07
		463.2	8.68742e-07
		463.34	8.36196e-07
		463.48	8.04789e-07
		463.62	7.74485e-07
		463.76	7.45247e-07
		463.9	7.17041e-07
		464.04	6.89833e-07
		464.18	6.63591e-07
		464.32	6.38282e-07
		464.46	6.13876e-07
		464.6	5.90344e-07
		464.74	5.67655e-07
		464.88	5.45783e-07
		465.02	5.24699e-07
		465.16	5.04378e-07
		465.3	4.84794e-07
		465.44	4.65922e-07
		465.58	4.47738e-07
		465.72	4.30218e-07
		465.86	4.13341e-07
		466	3.97084e-07
		466.14	3.81426e-07
		466.28	3.66347e-07
		466.42	3.51826e-07
		466.56	3.37845e-07
		466.7	3.24385e-07
		466.84	3.11428e-07
		466.98	2.98956e-07
		467.12	2.86952e-07
		467.26	2.75401e-07
		467.4	2.64285e-07
		467.54	2.53591e-07
		467.68	2.43303e-07
		467.82	2.33406e-07
		467.96	2.23887e-07
		468.1	2.14733e-07
		468.24	2.0593e-07
		468.38	1.97466e-07
		468.52	1.89329e-07
		468.66	1.81506e-07
		468.8	1.73987e-07
		468.94	1.66761e-07
		469.08	1.59817e-07
		469.22	1.53145e-07
		469.36	1.46734e-07
		469.5	1.40576e-07
		469.64	1.3466e-07
		469.78	1.28979e-07
		469.92	1.23523e-07
		470.06	1.18285e-07
		470.2	1.10292e-07
		470.34	1.05668e-07
		470.48	1.01224e-07
		470.62	9.69537e-08
		470.76	9.28513e-08
		470.9	8.89105e-08
		471.04	8.51255e-08
		471.18	8.14907e-08
		471.32	7.80006e-08
		471.46	7.46499e-08
		471.6	7.14336e-08
		471.74	6.83466e-08
		471.88	6.53842e-08
		472.02	6.25418e-08
		472.16	5.9815e-08
		472.3	5.71993e-08
		472.44	5.46907e-08
		472.58	5.2285e-08
		472.72	4.99784e-08
		472.86	4.77672e-08
		473	4.56476e-08
		473.14	4.36163e-08
		473.28	4.16697e-08
		473.42	3.98047e-08
		473.56	3.8018e-08
		473.7	3.63066e-08
		473.84	3.46676e-08
		473.98	3.30981e-08
		474.12	3.15954e-08
		474.26	3.01569e-08
		474.4	2.87801e-08
		474.54	2.74623e-08
		474.68	2.62014e-08
		474.82	2.49951e-08
		474.96	2.3841e-08
		475.1	2.27372e-08
		475.24	2.16816e-08
		475.38	2.06722e-08
		475.52	1.97071e-08
		475.66	1.87846e-08
		475.8	1.79028e-08
		475.94	1.70602e-08
		476.08	1.6255e-08
		476.22	1.54857e-08
		476.36	1.47509e-08
		476.5	1.4049e-08
		476.64	1.33788e-08
		476.78	1.27387e-08
		476.92	1.21277e-08
		477.06	1.15445e-08
		477.2	1.09878e-08
		477.34	1.04565e-08
		477.48	9.9496e-09
		477.62	9.466e-09
		477.76	9.00468e-09
		477.9	8.5647e-09
		478.04	8.14512e-09
		478.18	7.74505e-09
		478.32	7.36364e-09
		478.46	7.00007e-09
		478.6	6.65356e-09
		478.74	6.32335e-09
		478.88	6.00872e-09
		479.02	5.70897e-09
		479.16	5.42345e-09
		479.3	5.15152e-09
		479.44	4.89256e-09
		479.58	4.646e-09
		479.72	4.41126e-09
		479.86	4.18783e-09
[truncated: 1 more rows]

## Sheet: PlotDat12
Source sheet	Late Permian rocks	200	0	236.4	0	200	0
Plot name	ProbDens9	200.14	0	239.2	0	479.86	0
Plot Type	16	200.28	0	239.2	2
1st free col	9	200.42	0	236.4	2
Sigma Level	1	200.56	0	236.4	0
Absolute Errs	TRUE	200.7	0	ErrBox	ErrBox
Symbol Type	1	200.84	0	239.2	0
Inverse Plot	FALSE	200.98	0	242	0
Color Plot	FALSE	201.12	0	242	6
3D plot	FALSE	201.26	0	239.2	6
Linear	FALSE	201.4	0	239.2	0
Data Range	AA1:AB406	201.54	0	ErrBox	ErrBox
Filled Symbols	FALSE	201.68	0	242	0
ConcAge	FALSE	201.82	0	244.8	0
ConcSwap	FALSE	201.96	0	244.8	8
1st Symbol-row	1	202.1	0	242	8
		202.24	0	242	0
		202.38	0	ErrBox	ErrBox
		202.52	0	244.8	0
		202.66	0	247.6	0
		202.8	0	247.6	5
		202.94	0	244.8	5
		203.08	0	244.8	0
		203.22	0	ErrBox	ErrBox
		203.36	0	247.6	0
		203.5	0	250.4	0
		203.64	0	250.4	10
		203.78	0	247.6	10
		203.92	3.10552e-09	247.6	0
		204.06	3.38372e-09	ErrBox	ErrBox
		204.2	3.68558e-09	250.4	0
		204.34	4.013e-09	253.2	0
		204.48	4.36802e-09	253.2	13
		204.62	4.75283e-09	250.4	13
		204.76	5.16977e-09	250.4	0
		204.9	5.62137e-09	ErrBox	ErrBox
		205.04	6.11033e-09	253.2	0
		205.18	6.63956e-09	256	0
		205.32	7.21216e-09	256	14
		205.46	7.83148e-09	253.2	14
		205.6	8.50108e-09	253.2	0
		205.74	9.22478e-09	ErrBox	ErrBox
		205.88	1.00067e-08	256	0
		206.02	1.08511e-08	258.8	0
		206.16	1.17629e-08	258.8	19
		206.3	1.27468e-08	256	19
		206.44	1.38084e-08	256	0
		206.58	1.49533e-08	ErrBox	ErrBox
		206.72	1.61876e-08	258.8	0
		206.86	1.75177e-08	261.6	0
		207	1.89508e-08	261.6	26
		207.14	2.0494e-08	258.8	26
		207.28	2.21554e-08	258.8	0
		207.42	2.39433e-08	ErrBox	ErrBox
		207.56	2.58666e-08	261.6	0
		207.7	2.79349e-08	264.4	0
		207.84	3.01583e-08	264.4	21
		207.98	3.25476e-08	261.6	21
		208.12	3.51141e-08	261.6	0
		208.26	4.08995e-08	ErrBox	ErrBox
		208.4	4.71564e-08	264.4	0
		208.54	5.09636e-08	267.2	0
		208.68	5.50617e-08	267.2	28
		208.82	5.94716e-08	264.4	28
		208.96	6.42154e-08	264.4	0
		209.1	6.9317e-08	ErrBox	ErrBox
		209.24	7.48015e-08	267.2	0
		209.38	8.0696e-08	270	0
		209.52	8.70289e-08	270	14
		209.66	9.3831e-08	267.2	14
		209.8	1.01135e-07	267.2	0
		209.94	1.08974e-07	ErrBox	ErrBox
		210.08	1.17387e-07	270	0
		210.22	1.26411e-07	272.8	0
		210.36	1.36089e-07	272.8	17
		210.5	1.46464e-07	270	17
		210.64	1.57583e-07	270	0
		210.78	1.69497e-07	ErrBox	ErrBox
		210.92	1.82257e-07	272.8	0
		211.06	1.95919e-07	275.6	0
		211.2	2.10543e-07	275.6	13
		211.34	2.26192e-07	272.8	13
		211.48	2.42931e-07	272.8	0
		211.62	2.60833e-07	ErrBox	ErrBox
		211.76	2.7997e-07	275.6	0
		211.9	3.00423e-07	278.4	0
		212.04	3.22274e-07	278.4	5
		212.18	3.45611e-07	275.6	5
		212.32	3.7053e-07	275.6	0
		212.46	3.97126e-07	ErrBox	ErrBox
		212.6	4.25506e-07	278.4	0
		212.74	4.55778e-07	281.2	0
		212.88	4.88059e-07	281.2	4
		213.02	5.22471e-07	278.4	4
		213.16	5.59144e-07	278.4	0
		213.3	5.98212e-07	ErrBox	ErrBox
		213.44	6.39819e-07	281.2	0
		213.58	6.84117e-07	284	0
		213.72	7.31263e-07	284	4
		213.86	7.81425e-07	281.2	4
		214	8.34778e-07	281.2	0
		214.14	8.91508e-07	ErrBox	ErrBox
		214.28	9.51808e-07	284	0
		214.42	1.01588e-06	286.8	0
		214.56	1.08394e-06	286.8	6
		214.7	1.15622e-06	284	6
		214.84	1.23294e-06	284	0
		214.98	1.31751e-06	ErrBox	ErrBox
		215.12	1.4041e-06	286.8	0
		215.26	1.49593e-06	289.6	0
		215.4	1.59329e-06	289.6	3
		215.54	1.69964e-06	286.8	3
		215.68	1.81269e-06	286.8	0
		215.82	1.9294e-06	ErrBox	ErrBox
		215.96	2.05303e-06	289.6	0
		216.1	2.19037e-06	292.4	0
		216.24	2.33289e-06	292.4	3
		216.38	2.4809e-06	289.6	3
		216.52	2.63759e-06	289.6	0
		216.66	2.80341e-06	ErrBox	ErrBox
		216.8	2.97886e-06	292.4	0
		216.94	3.16443e-06	295.2	0
		217.08	3.36066e-06	295.2	4
		217.22	3.57141e-06	292.4	4
		217.36	3.79103e-06	292.4	0
		217.5	4.02309e-06	ErrBox	ErrBox
		217.64	4.27137e-06	295.2	0
		217.78	4.53045e-06	298	0
		217.92	4.80402e-06	298	9
		218.06	5.0928e-06	295.2	9
		218.2	5.39758e-06	295.2	0
		218.34	5.71914e-06	ErrBox	ErrBox
		218.48	6.05835e-06	298	0
		218.62	6.41609e-06	300.8	0
		218.76	6.79327e-06	300.8	9
		218.9	7.19385e-06	298	9
		219.04	7.61328e-06	298	0
		219.18	8.05525e-06	ErrBox	ErrBox
		219.32	8.52085e-06	300.8	0
		219.46	9.01126e-06	303.6	0
		219.6	9.5339e-06	303.6	4
		219.74	1.00782e-05	300.8	4
		219.88	1.06512e-05	300.8	0
		220.02	1.12543e-05	ErrBox	ErrBox
		220.16	1.18889e-05	303.6	0
		220.3	1.25566e-05	306.4	0
		220.44	1.32589e-05	306.4	4
		220.58	1.39975e-05	303.6	4
		220.72	1.47741e-05	303.6	0
		220.86	1.55906e-05	ErrBox	ErrBox
		221	1.64489e-05	306.4	0
		221.14	1.73509e-05	309.2	0
		221.28	1.82988e-05	309.2	8
		221.42	1.92946e-05	306.4	8
		221.56	2.03406e-05	306.4	0
		221.7	2.14426e-05	ErrBox	ErrBox
		221.84	2.25968e-05	309.2	0
		221.98	2.38088e-05	312	0
		222.12	2.50941e-05	312	11
		222.26	2.64319e-05	309.2	11
		222.4	2.78394e-05	309.2	0
		222.54	2.93138e-05	ErrBox	ErrBox
		222.68	3.08642e-05	312	0
		222.82	3.24884e-05	314.8	0
		222.96	3.41926e-05	314.8	8
		223.1	3.59805e-05	312	8
		223.24	3.78561e-05	312	0
		223.38	3.98235e-05	ErrBox	ErrBox
		223.52	4.18869e-05	314.8	0
		223.66	4.40509e-05	317.6	0
		223.8	4.632e-05	317.6	3
		223.94	4.86993e-05	314.8	3
		224.08	5.11969e-05	314.8	0
		224.22	5.38122e-05	ErrBox	ErrBox
		224.36	5.65537e-05	317.6	0
		224.5	5.94271e-05	320.4	0
		224.64	6.24419e-05	320.4	4
		224.78	6.56048e-05	317.6	4
		224.92	6.89164e-05	317.6	0
		225.06	7.23837e-05	ErrBox	ErrBox
		225.2	7.60166e-05	320.4	0
		225.34	7.98259e-05	323.2	0
		225.48	8.38138e-05	323.2	3
		225.62	8.79913e-05	320.4	3
		225.76	9.23672e-05	320.4	0
		225.9	9.6957e-05	ErrBox	ErrBox
		226.04	0.000101758	323.2	0
		226.18	0.000106787	326	0
		226.32	0.000112056	326	6
		226.46	0.000117573	323.2	6
		226.6	0.000123348	323.2	0
		226.74	0.000129397	ErrBox	ErrBox
		226.88	0.000135731	326	0
		227.02	0.000142362	328.8	0
		227.16	0.000149307	328.8	3
		227.3	0.000156574	326	3
		227.44	0.000164181	326	0
		227.58	0.000172147	ErrBox	ErrBox
		227.72	0.000180477	328.8	0
		227.86	0.000189195	331.6	0
		228	0.000198317	331.6	2
		228.14	0.000207863	328.8	2
		228.28	0.000217849	328.8	0
		228.42	0.000228299	ErrBox	ErrBox
		228.56	0.00023923	331.6	0
		228.7	0.000250667	334.4	0
		228.84	0.000262628	334.4	5
		228.98	0.000275132	331.6	5
		229.12	0.000288205	331.6	0
		229.26	0.000301871	ErrBox	ErrBox
		229.4	0.000316158	334.4	0
		229.54	0.000331082	337.2	0
		229.68	0.000346673	337.2	5
		229.82	0.000362959	334.4	5
		229.96	0.00037997	334.4	0
		230.1	0.000397727	ErrBox	ErrBox
		230.24	0.000416265	337.2	0
		230.38	0.000435608	340	0
		230.52	0.000455784	340	2
		230.66	0.000476823	337.2	2
		230.8	0.000498759	337.2	0
		230.94	0.000521615	ErrBox	ErrBox
		231.08	0.000545424	340	0
		231.22	0.000570214	342.8	0
		231.36	0.00059602	342.8	3
		231.5	0.000622874	340	3
		231.64	0.000650792	340	0
		231.78	0.000679806	ErrBox	ErrBox
		231.92	0.000709946	345.6	0
		232.06	0.000741239	348.4	0
		232.2	0.000773711	348.4	4
		232.34	0.00080739	345.6	4
		232.48	0.000842299	345.6	0
		232.62	0.000878469	ErrBox	ErrBox
		232.76	0.000915901	348.4	0
		232.9	0.000954631	351.2	0
		233.04	0.000994669	351.2	4
		233.18	0.00103603	348.4	4
		233.32	0.00107874	348.4	0
		233.46	0.0011228	ErrBox	ErrBox
		233.6	0.00116823	351.2	0
		233.74	0.00121503	354	0
		233.88	0.00126321	354	2
		234.02	0.00131277	351.2	2
		234.16	0.00136372	351.2	0
		234.3	0.00141606	ErrBox	ErrBox
		234.44	0.00146978	354	0
		234.58	0.00152488	356.8	0
		234.72	0.00158135	356.8	2
		234.86	0.00163918	354	2
		235	0.00169836	354	0
		235.14	0.00175887	ErrBox	ErrBox
		235.28	0.00182069	356.8	0
		235.42	0.00188383	359.6	0
		235.56	0.00194824	359.6	1
		235.7	0.00201392	356.8	1
		235.84	0.00208084	356.8	0
		235.98	0.00214897	ErrBox	ErrBox
		236.12	0.00221829	359.6	0
		236.26	0.00228878	362.4	0
		236.4	0.00236039	362.4	2
		236.54	0.00243313	359.6	2
		236.68	0.00250694	359.6	0
		236.82	0.00258181	ErrBox	ErrBox
		236.96	0.0026577	370.8	0
		237.1	0.00273458	373.6	0
		237.24	0.00281244	373.6	2
		237.38	0.00289123	370.8	2
		237.52	0.00297093	370.8	0
		237.66	0.00305152	ErrBox	ErrBox
		237.8	0.00313296	384.8	0
		237.94	0.00321523	387.6	0
		238.08	0.0032983	387.6	1
		238.22	0.00338216	384.8	1
		238.36	0.00346678	384.8	0
		238.5	0.00355214	ErrBox	ErrBox
		238.64	0.0036382	424	0
		238.78	0.00372495	426.8	0
		238.92	0.00381238	426.8	2
		239.06	0.00390045	424	2
		239.2	0.00398916	424	0
		239.34	0.00407848	ErrBox	ErrBox
		239.48	0.0041684	426.8	0
		239.62	0.00425891	429.6	0
		239.76	0.00434998	429.6	1
		239.9	0.00444161	426.8	1
		240.04	0.00453377	426.8	0
		240.18	0.00462645	ErrBox	ErrBox
		240.32	0.00471964
		240.46	0.00481332
		240.6	0.00490748
		240.74	0.00500212
		240.88	0.0050972
		241.02	0.00519273
		241.16	0.00528869
		241.3	0.00538507
		241.44	0.00548185
		241.58	0.00557902
		241.72	0.00567657
		241.86	0.0057745
		242	0.00587279
		242.14	0.00597142
		242.28	0.00607039
		242.42	0.00616968
		242.56	0.0062693
		242.7	0.00636922
		242.84	0.00646945
		242.98	0.00656997
		243.12	0.0066708
		243.26	0.00677191
		243.4	0.0068733
		243.54	0.00697498
		243.68	0.00707694
		243.82	0.00717919
		243.96	0.00728172
		244.1	0.00738456
		244.24	0.0074877
		244.38	0.00759114
		244.52	0.00769489
		244.66	0.00779897
		244.8	0.00790339
		244.94	0.00800817
		245.08	0.00811331
		245.22	0.00821884
		245.36	0.00832476
		245.5	0.00843111
		245.64	0.0085379
		245.78	0.00864515
		245.92	0.00875286
		246.06	0.00886109
		246.2	0.00896982
		246.34	0.0090791
		246.48	0.00918894
		246.62	0.00929937
		246.76	0.00941039
		246.9	0.00952203
		247.04	0.00963431
		247.18	0.00974724
		247.32	0.00986085
		247.46	0.00997513
		247.6	0.0100901
		247.74	0.0102058
		247.88	0.0103222
		248.02	0.0104394
		248.16	0.0105572
		248.3	0.0106758
		248.44	0.0107951
		248.58	0.0109152
		248.72	0.011036
		248.86	0.0111575
		249	0.0112798
		249.14	0.0114027
		249.28	0.0115263
		249.42	0.0116507
		249.56	0.0117757
		249.7	0.0119013
		249.84	0.0120276
		249.98	0.0121545
		250.12	0.012282
		250.26	0.0124101
		250.4	0.0125388
		250.54	0.012668
		250.68	0.0127978
		250.82	0.0129281
		250.96	0.0130588
		251.1	0.0131901
		251.24	0.0133218
		251.38	0.0134539
		251.52	0.0135865
		251.66	0.0137196
		251.8	0.013853
		251.94	0.0139868
		252.08	0.0141211
		252.22	0.0142558
		252.36	0.0143908
		252.5	0.0145263
		252.64	0.0146622
		252.78	0.0147984
		252.92	0.0149351
		253.06	0.0150722
		253.2	0.0152098
		253.34	0.0153478
		253.48	0.0154862
		253.62	0.0156251
		253.76	0.0157644
		253.9	0.0159042
		254.04	0.0160445
		254.18	0.0161853
		254.32	0.0163266
		254.46	0.0164683
		254.6	0.0166106
		254.74	0.0167533
		254.88	0.0168965
		255.02	0.0170402
		255.16	0.0171843
		255.3	0.0173288
		255.44	0.0174738
		255.58	0.0176191
		255.72	0.0177647
		255.86	0.0179106
		256	0.0180567
		256.14	0.018203
		256.28	0.0183494
		256.42	0.0184958
		256.56	0.0186421
		256.7	0.0187884
		256.84	0.0189344
		256.98	0.0190801
		257.12	0.0192254
		257.26	0.0193701
		257.4	0.0195142
		257.54	0.0196575
		257.68	0.0197999
		257.82	0.0199413
		257.96	0.0200816
		258.1	0.0202205
		258.24	0.0203581
		258.38	0.020494
		258.52	0.0206282
		258.66	0.0207606
		258.8	0.0208909
		258.94	0.0210191
		259.08	0.0211449
		259.22	0.0212682
		259.36	0.021389
		259.5	0.0215069
		259.64	0.0216219
		259.78	0.0217339
		259.92	0.0218426
		260.06	0.021948
		260.2	0.0220499
		260.34	0.0221481
		260.48	0.0222426
		260.62	0.0223332
		260.76	0.0224197
		260.9	0.0225021
		261.04	0.0225803
		261.18	0.022654
		261.32	0.0227233
		261.46	0.022788
		261.6	0.022848
		261.74	0.0229032
		261.88	0.0229535
		262.02	0.0229989
		262.16	0.0230393
		262.3	0.0230745
		262.44	0.0231046
		262.58	0.0231295
		262.72	0.0231491
		262.86	0.0231634
		263	0.0231723
		263.14	0.0231758
		263.28	0.0231739
		263.42	0.0231665
		263.56	0.0231537
		263.7	0.0231354
		263.84	0.0231116
		263.98	0.0230824
		264.12	0.0230477
		264.26	0.0230076
		264.4	0.022962
		264.54	0.022911
		264.68	0.0228547
		264.82	0.0227931
		264.96	0.0227263
		265.1	0.0226542
		265.24	0.022577
		265.38	0.0224947
		265.52	0.0224075
		265.66	0.0223153
		265.8	0.0222183
		265.94	0.0221165
		266.08	0.0220102
		266.22	0.0218993
		266.36	0.0217839
		266.5	0.0216643
		266.64	0.0215404
		266.78	0.0214125
		266.92	0.0212806
		267.06	0.0211449
		267.2	0.0210054
		267.34	0.0208624
		267.48	0.020716
		267.62	0.0205662
		267.76	0.0204133
		267.9	0.0202573
		268.04	0.0200985
		268.18	0.0199369
		268.32	0.0197727
		268.46	0.019606
		268.6	0.0194369
		268.74	0.0192656
		268.88	0.0190923
		269.02	0.018917
		269.16	0.0187399
		269.3	0.0185611
		269.44	0.0183808
		269.58	0.018199
		269.72	0.0180159
		269.86	0.0178316
		270	0.0176462
		270.14	0.0174598
		270.28	0.0172726
		270.42	0.0170846
		270.56	0.0168959
		270.7	0.0167067
		270.84	0.0165171
		270.98	0.016327
		271.12	0.0161367
		271.26	0.0159461
		271.4	0.0157555
		271.54	0.0155648
		271.68	0.0153742
		271.82	0.0151837
		271.96	0.0149933
		272.1	0.0148033
		272.24	0.0146135
		272.38	0.0144242
		272.52	0.0142353
		272.66	0.0140469
		272.8	0.0138592
		272.94	0.013672
		273.08	0.0134856
		273.22	0.0132999
		273.36	0.0131151
		273.5	0.0129311
		273.64	0.0127481
		273.78	0.012566
		273.92	0.0123851
		274.06	0.0122052
		274.2	0.0120264
		274.34	0.0118489
		274.48	0.0116727
		274.62	0.0114977
		274.76	0.0113242
		274.9	0.0111521
		275.04	0.0109815
		275.18	0.0108125
		275.32	0.010645
		275.46	0.0104793
		275.6	0.0103152
		275.74	0.010153
		275.88	0.00999252
		276.02	0.00983398
		276.16	0.0096774
		276.3	0.00952281
		276.44	0.00937028
		276.58	0.00921986
		276.72	0.00907161
		276.86	0.00892557
		277	0.00878179
		277.14	0.00864033
		277.28	0.00850122
		277.42	0.00836452
		277.56	0.00823026
		277.7	0.00809849
		277.84	0.00796926
		277.98	0.00784258
		278.12	0.00771849
		278.26	0.00759704
		278.4	0.00747824
		278.54	0.00736211
		278.68	0.00724869
		278.82	0.00713799
		278.96	0.00703002
		279.1	0.00692479
		279.24	0.00682232
		279.38	0.00672261
		279.52	0.00662566
		279.66	0.00653148
		279.8	0.00644004
		279.94	0.00635135
		280.08	0.00626539
		280.22	0.00618215
		280.36	0.00610161
		280.5	0.00602374
		280.64	0.00594853
		280.78	0.00587594
		280.92	0.00580593
		281.06	0.00573849
		281.2	0.00567357
		281.34	0.00561113
		281.48	0.00555113
		281.62	0.00549353
		281.76	0.00543828
		281.9	0.00538532
		282.04	0.00533463
		282.18	0.00528614
		282.32	0.00523981
		282.46	0.00519557
		282.6	0.00515339
		282.74	0.0051132
		282.88	0.00507494
		283.02	0.00503857
		283.16	0.00500402
		283.3	0.00497125
		283.44	0.0049402
		283.58	0.00491081
		283.72	0.00488303
		283.86	0.0048568
		284	0.00483208
		284.14	0.00480883
		284.28	0.00478697
		284.42	0.00476647
		284.56	0.00474729
		284.7	0.00472937
		284.84	0.00471267
		284.98	0.00469715
		285.12	0.00468279
		285.26	0.00466952
		285.4	0.00465732
		285.54	0.00464616
		285.68	0.00463601
		285.82	0.00462683
		285.96	0.0046186
		286.1	0.00461131
		286.24	0.00460492
		286.38	0.00459942
		286.52	0.00459479
		286.66	0.00459101
		286.8	0.00458808
		286.94	0.00458599
		287.08	0.00458472
		287.22	0.00458427
		287.36	0.00458464
		287.5	0.00458582
		287.64	0.00458783
		287.78	0.00459066
		287.92	0.00459431
		288.06	0.0045988
		288.2	0.00460412
		288.34	0.00461031
		288.48	0.00461736
		288.62	0.00462528
		288.76	0.00463409
		288.9	0.00464381
		289.04	0.00465446
		289.18	0.00466604
		289.32	0.00467858
		289.46	0.00469209
		289.6	0.00470659
		289.74	0.00472209
		289.88	0.00473862
		290.02	0.0047562
		290.16	0.00477483
		290.3	0.00479452
		290.44	0.00481531
		290.58	0.00483721
		290.72	0.00486021
		290.86	0.00488433
		291	0.00490957
		291.14	0.00493596
		291.28	0.00496348
		291.42	0.00499213
		291.56	0.00502192
		291.7	0.00505283
		291.84	0.00508486
		291.98	0.00511799
		292.12	0.00515222
		292.26	0.00518751
		292.4	0.00522386
		292.54	0.00526122
		292.68	0.00529957
		292.82	0.00533888
		292.96	0.0053791
		293.1	0.0054202
		293.24	0.00546212
		293.38	0.00550482
		293.52	0.00554824
		293.66	0.00559233
		293.8	0.00563702
		293.94	0.00568226
		294.08	0.00572796
		294.22	0.00577406
		294.36	0.00582049
		294.5	0.00586717
		294.64	0.00591403
		294.78	0.00596099
		294.92	0.00600796
		295.06	0.00605487
		295.2	0.00610163
		295.34	0.00614817
		295.48	0.0061944
		295.62	0.00624025
		295.76	0.00628562
		295.9	0.00633045
		296.04	0.00637465
		296.18	0.00641816
		296.32	0.00646089
		296.46	0.0065028
		296.6	0.0065438
		296.74	0.00658383
		296.88	0.00662284
		297.02	0.00666077
		297.16	0.00669758
		297.3	0.00673322
		297.44	0.00676765
		297.58	0.00680084
		297.72	0.00683276
		297.86	0.00686338
		298	0.00689269
		298.14	0.00692066
		298.28	0.0069473
		298.42	0.00697259
		298.56	0.00699655
		298.7	0.00701917
		298.84	0.00704046
		298.98	0.00706045
		299.12	0.00707915
		299.26	0.00709659
		299.4	0.0071128
		299.54	0.0071278
		299.68	0.00714164
		299.82	0.00715436
		299.96	0.00716598
		300.1	0.00717657
		300.24	0.00718616
		300.38	0.0071948
		300.52	0.00720255
		300.66	0.00720945
		300.8	0.00721555
		300.94	0.0072209
		301.08	0.00722557
		301.22	0.0072296
		301.36	0.00723305
		301.5	0.00723596
		301.64	0.00723839
		301.78	0.00724039
		301.92	0.007242
		302.06	0.00724329
		302.2	0.00724428
		302.34	0.00724504
		302.48	0.0072456
		302.62	0.007246
		302.76	0.00724627
		302.9	0.00724647
		303.04	0.00724662
		303.18	0.00724675
		303.32	0.00724689
		303.46	0.00724707
		303.6	0.00724732
		303.74	0.00724766
		303.88	0.0072481
		304.02	0.00724867
		304.16	0.00724937
		304.3	0.00725023
		304.44	0.00725125
		304.58	0.00725243
		304.72	0.00725378
		304.86	0.00725529
		305	0.00725698
		305.14	0.00725884
		305.28	0.00726086
		305.42	0.00726303
		305.56	0.00726534
		305.7	0.00726779
		305.84	0.00727035
		305.98	0.007273
		306.12	0.00727574
		306.26	0.00727853
		306.4	0.00728136
		306.54	0.00728419
		306.68	0.007287
		306.82	0.00728976
		306.96	0.00729244
		307.1	0.00729502
		307.24	0.00729745
		307.38	0.0072997
		307.52	0.00730173
		307.66	0.00730351
		307.8	0.00730499
		307.94	0.00730614
		308.08	0.00730692
		308.22	0.00730729
		308.36	0.0073072
		308.5	0.00730662
		308.64	0.0073055
		308.78	0.0073038
		308.92	0.00730147
		309.06	0.00729848
		309.2	0.00729479
		309.34	0.00729035
		309.48	0.00728513
		309.62	0.00727909
		309.76	0.00727218
		309.9	0.00726438
		310.04	0.00725564
		310.18	0.00724595
		310.32	0.00723525
		310.46	0.00722353
		310.6	0.00721077
		310.74	0.00719692
		310.88	0.00718198
		311.02	0.00716593
		311.16	0.00714874
		311.3	0.0071304
		311.44	0.00711091
		311.58	0.00709025
		311.72	0.00706842
		311.86	0.00704542
		312	0.00702126
		312.14	0.00699592
		312.28	0.00696944
		312.42	0.0069418
		312.56	0.00691304
		312.7	0.00688316
		312.84	0.00685219
		312.98	0.00682016
		313.12	0.00678709
		313.26	0.00675302
		313.4	0.00671796
		313.54	0.00668197
		313.68	0.00664508
		313.82	0.00660732
		313.96	0.00656876
		314.1	0.00652942
		314.24	0.00648936
		314.38	0.00644863
		314.52	0.00640727
		314.66	0.00636534
		314.8	0.00632288
		314.94	0.00627996
		315.08	0.00623664
		315.22	0.00619296
		315.36	0.00614898
		315.5	0.00610476
		315.64	0.00606034
		315.78	0.0060158
		315.92	0.00597117
		316.06	0.00592652
		316.2	0.00588189
		316.34	0.00583735
		316.48	0.00579293
		316.62	0.00574869
		316.76	0.00570468
		316.9	0.00566094
		317.04	0.00561752
		317.18	0.00557445
		317.32	0.00553178
		317.46	0.00548954
		317.6	0.00544778
		317.74	0.00540652
		317.88	0.00536579
		318.02	0.00532562
		318.16	0.00528605
		318.3	0.00524708
		318.44	0.00520876
		318.58	0.00517109
		318.72	0.00513409
		318.86	0.00509778
		319	0.00506217
		319.14	0.00502727
		319.28	0.00499308
		319.42	0.00495961
		319.56	0.00492688
		319.7	0.00489488
		319.84	0.00486361
		319.98	0.00483307
		320.12	0.00480326
		320.26	0.00477418
		320.4	0.00474581
		320.54	0.00471816
		320.68	0.00469121
		320.82	0.00466496
		320.96	0.00463939
		321.1	0.0046145
		321.24	0.00459027
		321.38	0.0045667
		321.52	0.00454377
		321.66	0.00452146
		321.8	0.00449977
		321.94	0.00447868
		322.08	0.00445817
		322.22	0.00443824
		322.36	0.00441887
		322.5	0.00440004
		322.64	0.00438174
		322.78	0.00436396
		322.92	0.00434667
		323.06	0.00432988
		323.2	0.00431356
		323.34	0.0042977
		323.48	0.00428229
		323.62	0.00426732
		323.76	0.00425277
		323.9	0.00423863
		324.04	0.00422489
		324.18	0.00421154
		324.32	0.00419857
		324.46	0.00418596
		324.6	0.0041737
		324.74	0.0041618
		324.88	0.00415023
		325.02	0.00413898
		325.16	0.00412805
		325.3	0.00411743
		325.44	0.00410711
		325.58	0.00409708
		325.72	0.00408733
		325.86	0.00407786
		326	0.00406865
		326.14	0.00405971
		326.28	0.00405101
		326.42	0.00404256
		326.56	0.00403435
		326.7	0.00402637
		326.84	0.00401861
		326.98	0.00401108
		327.12	0.00400375
		327.26	0.00399662
		327.4	0.0039897
		327.54	0.00398296
		327.68	0.00397641
		327.82	0.00397003
		327.96	0.00396383
		328.1	0.00395779
		328.24	0.00395191
		328.38	0.00394618
		328.52	0.00394059
		328.66	0.00393514
		328.8	0.00392983
		328.94	0.00392463
		329.08	0.00391956
		329.22	0.00391459
		329.36	0.00390973
		329.5	0.00390496
		329.64	0.00390028
		329.78	0.00389569
		329.92	0.00389116
		330.06	0.0038867
		330.2	0.00388231
		330.34	0.00387797
		330.48	0.00387367
		330.62	0.00386941
		330.76	0.00386517
		330.9	0.00386096
		331.04	0.00385676
		331.18	0.00385258
		331.32	0.00384839
		331.46	0.00384419
		331.6	0.00383998
		331.74	0.00383574
		331.88	0.00383148
		332.02	0.00382717
		332.16	0.00382282
		332.3	0.00381842
		332.44	0.00381395
		332.58	0.00380942
		332.72	0.0038048
		332.86	0.00380011
		333	0.00379532
		333.14	0.00379044
		333.28	0.00378546
		333.42	0.00378036
		333.56	0.00377514
		333.7	0.0037698
		333.84	0.00376432
		333.98	0.00375872
		334.12	0.00375297
		334.26	0.00374707
		334.4	0.00374101
		334.54	0.0037348
		334.68	0.00372842
		334.82	0.00372186
		334.96	0.00371514
		335.1	0.00370823
		335.24	0.00370113
		335.38	0.00369384
		335.52	0.00368637
		335.66	0.0036787
		335.8	0.00367082
		335.94	0.00366275
		336.08	0.00365447
		336.22	0.00364599
		336.36	0.00363729
		336.5	0.00362839
		336.64	0.00361926
		336.78	0.00360993
		336.92	0.00360039
		337.06	0.00359063
		337.2	0.00358066
		337.34	0.00357048
		337.48	0.00356008
		337.62	0.00354948
		337.76	0.00353867
		337.9	0.00352765
		338.04	0.00351643
		338.18	0.00350501
		338.32	0.00349339
		338.46	0.00348158
		338.6	0.00346958
		338.74	0.00345739
		338.88	0.00344502
		339.02	0.00343248
		339.16	0.00341976
		339.3	0.00340688
		339.44	0.00339384
		339.58	0.00338065
		339.72	0.0033673
		339.86	0.00335382
		340	0.0033402
		340.14	0.00332646
		340.28	0.00331259
		340.42	0.00329861
		340.56	0.00328452
		340.7	0.00327033
		340.84	0.00325604
		340.98	0.00324167
		341.12	0.00322723
		341.26	0.00321271
		341.4	0.00319812
		341.54	0.00318348
		341.68	0.00316879
		341.82	0.00315406
		341.96	0.00313929
		342.1	0.00312448
		342.24	0.00310966
		342.38	0.00309482
		342.52	0.00307996
		342.66	0.00306509
		342.8	0.00305023
		342.94	0.00303537
		343.08	0.00302052
		343.22	0.00300568
		343.36	0.00299086
		343.5	0.00297606
		343.64	0.00296129
		343.78	0.00294655
		343.92	0.00293183
		344.06	0.00291715
		344.2	0.0029025
		344.34	0.00288789
		344.48	0.00287332
		344.62	0.00285879
		344.76	0.00284431
		344.9	0.00282985
		345.04	0.00281545
		345.18	0.00280108
		345.32	0.00278676
		345.46	0.00277247
		345.6	0.00275822
		345.74	0.002744
		345.88	0.00272983
		346.02	0.00271569
		346.16	0.00270157
		346.3	0.00268749
		346.44	0.00267344
		346.58	0.0026594
		346.72	0.00264539
		346.86	0.0026314
		347	0.00261743
		347.14	0.00260347
		347.28	0.00258952
		347.42	0.00257558
		347.56	0.00256165
		347.7	0.00254772
		347.84	0.00253378
		347.98	0.00251985
		348.12	0.00250591
		348.26	0.00249196
		348.4	0.00247801
		348.54	0.00246404
		348.68	0.00245006
		348.82	0.00243606
		348.96	0.00242205
		349.1	0.00240801
		349.24	0.00239396
		349.38	0.00237989
		349.52	0.0023658
		349.66	0.00235168
		349.8	0.00233755
		349.94	0.00232339
		350.08	0.00230922
		350.22	0.00229502
		350.36	0.0022808
		350.5	0.00226657
		350.64	0.00225231
		350.78	0.00223804
		350.92	0.00222376
		351.06	0.00220947
		351.2	0.00219516
		351.34	0.00218085
		351.48	0.00216653
		351.62	0.00215221
		351.76	0.0021379
		351.9	0.00212358
		352.04	0.00210927
		352.18	0.00209497
		352.32	0.00208068
		352.46	0.00206641
		352.6	0.00205216
		352.74	0.00203794
		352.88	0.00202374
		353.02	0.00200956
		353.16	0.00199543
		353.3	0.00198132
		353.44	0.00196726
		353.58	0.00195324
		353.72	0.00193927
		353.86	0.00192534
		354	0.00191147
		354.14	0.00189765
		354.28	0.0018839
		354.42	0.0018702
		354.56	0.00185656
		354.7	0.00184299
		354.84	0.00182949
		354.98	0.00181605
		355.12	0.00180269
		355.26	0.0017894
		355.4	0.00177618
		355.54	0.00176304
		355.68	0.00174997
		355.82	0.00173698
		355.96	0.00172406
		356.1	0.00171123
		356.24	0.00169847
		356.38	0.00168579
		356.52	0.00167319
		356.66	0.00166066
		356.8	0.00164821
		356.94	0.00163583
		357.08	0.00162353
		357.22	0.00161131
		357.36	0.00159916
		357.5	0.00158708
		357.64	0.00157506
		357.78	0.00156312
		357.92	0.00155125
		358.06	0.00153944
		358.2	0.0015277
		358.34	0.00151601
		358.48	0.00150439
		358.62	0.00149282
		358.76	0.00148131
		358.9	0.00146986
		359.04	0.00145845
		359.18	0.0014471
		359.32	0.00143579
		359.46	0.00142453
		359.6	0.00141331
		359.74	0.00140214
		359.88	0.00139101
		360.02	0.00137991
		360.16	0.00136886
		360.3	0.00135783
		360.44	0.00134685
		360.58	0.00133589
		360.72	0.00132497
		360.86	0.00131408
		361	0.00130322
		361.14	0.00129238
		361.28	0.00128158
		361.42	0.0012708
		361.56	0.00126004
		361.7	0.00124932
		361.84	0.00123862
		361.98	0.00122794
		362.12	0.00121729
		362.26	0.00120667
		362.4	0.00119607
		362.54	0.0011855
		362.68	0.00117495
		362.82	0.00116443
		362.96	0.00115394
		363.1	0.00114348
		363.24	0.00113305
		363.38	0.00112265
		363.52	0.00111229
		363.66	0.00110195
		363.8	0.00109165
		363.94	0.00108139
		364.08	0.00107116
		364.22	0.00106097
		364.36	0.00105083
		364.5	0.00104072
		364.64	0.00103065
		364.78	0.00102064
		364.92	0.00101066
		365.06	0.00100074
		365.2	0.000990863
		365.34	0.00098104
		365.48	0.00097127
		365.62	0.000961551
		365.76	0.000951891
		365.9	0.000942289
		366.04	0.000932746
		366.18	0.000923263
		366.32	0.000913842
		366.46	0.000904481
		366.6	0.000895188
		366.74	0.000885959
		366.88	0.000876799
		367.02	0.000867708
		367.16	0.000858686
		367.3	0.000849734
		367.44	0.000840854
		367.58	0.000832045
		367.72	0.00082331
		367.86	0.000814645
		368	0.000806058
		368.14	0.000797545
		368.28	0.000789108
		368.42	0.000780747
		368.56	0.000772462
		368.7	0.000764253
		368.84	0.000756121
		368.98	0.000748066
		369.12	0.000740087
		369.26	0.00073218
		369.4	0.000724357
		369.54	0.00071661
		369.68	0.00070894
		369.82	0.000701347
		369.96	0.00069383
		370.1	0.00068639
		370.24	0.000679026
		370.38	0.000671738
		370.52	0.000664526
		370.66	0.000657391
		370.8	0.00065033
		370.94	0.000643342
		371.08	0.00063643
		371.22	0.000629591
		371.36	0.000622824
		371.5	0.000616133
		371.64	0.000609515
		371.78	0.000602971
		371.92	0.000596499
		372.06	0.000590099
		372.2	0.000583772
		372.34	0.000577517
		372.48	0.000571334
		372.62	0.000565223
		372.76	0.000559184
		372.9	0.000553216
		373.04	0.00054732
		373.18	0.000541495
		373.32	0.000535742
		373.46	0.000530057
		373.6	0.000524448
		373.74	0.00051891
		373.88	0.000513444
		374.02	0.000508047
		374.16	0.000502725
		374.3	0.000497476
		374.44	0.000492299
		374.58	0.000487195
		374.72	0.000482163
		374.86	0.000477204
		375	0.000472319
		375.14	0.000467507
		375.28	0.000462768
		375.42	0.000458104
		375.56	0.000453513
		375.7	0.000448996
		375.84	0.000444553
		375.98	0.000440185
		376.12	0.00043589
		376.26	0.00043167
		376.4	0.000427524
		376.54	0.000423452
		376.68	0.000419454
		376.82	0.000415529
		376.96	0.000411678
		377.1	0.0004079
		377.24	0.000404194
		377.38	0.000400561
		377.52	0.000396999
		377.66	0.000393509
		377.8	0.000390088
		377.94	0.000386737
		378.08	0.000383454
		378.22	0.000380239
		378.36	0.000377091
		378.5	0.000374008
		378.64	0.000370989
		378.78	0.000368032
		378.92	0.000365138
		379.06	0.0003623
		379.2	0.000359523
		379.34	0.000356803
		379.48	0.000354137
		379.62	0.000351525
		379.76	0.000348964
		379.9	0.000346451
		380.04	0.000343986
		380.18	0.000341565
		380.32	0.000339184
		380.46	0.000336846
		380.6	0.000334544
		380.74	0.000332279
		380.88	0.000330048
		381.02	0.000327848
		381.16	0.000325675
		381.3	0.000323528
		381.44	0.000321404
		381.58	0.0003193
		381.72	0.000317214
		381.86	0.000315143
		382	0.000313084
		382.14	0.000311035
		382.28	0.000308994
		382.42	0.000306957
		382.56	0.00030492
		382.7	0.000302885
		382.84	0.000300847
		382.98	0.000298804
		383.12	0.000296753
		383.26	0.000294692
		383.4	0.000292619
		383.54	0.000290529
		383.68	0.000288425
		383.82	0.000286302
		383.96	0.000284159
		384.1	0.000281994
		384.24	0.000279804
		384.38	0.000277589
		384.52	0.000275347
		384.66	0.000273075
		384.8	0.000270774
		384.94	0.000268442
		385.08	0.000266077
		385.22	0.000263679
		385.36	0.000261247
		385.5	0.00025878
		385.64	0.000256278
		385.78	0.00025374
		385.92	0.000251166
		386.06	0.000248555
		386.2	0.000245909
		386.34	0.000243229
		386.48	0.00024051
		386.62	0.000237755
		386.76	0.000234965
		386.9	0.00023214
		387.04	0.000229281
		387.18	0.000226389
		387.32	0.000223461
		387.46	0.000220505
		387.6	0.000217519
		387.74	0.000214503
		387.88	0.00021146
		388.02	0.000208388
		388.16	0.000205294
		388.3	0.000202177
		388.44	0.000199038
		388.58	0.000195879
		388.72	0.000192702
		388.86	0.000189509
		389	0.000186301
		389.14	0.000183082
		389.28	0.000179852
		389.42	0.000176611
		389.56	0.000173367
		389.7	0.000170119
		389.84	0.000166869
		389.98	0.000163619
		390.12	0.000160372
		390.26	0.000157129
		390.4	0.000153894
		390.54	0.000150664
		390.68	0.000147448
		390.82	0.000144246
		390.96	0.000141056
		391.1	0.000137887
		391.24	0.000134738
		391.38	0.000131607
		391.52	0.000128503
		391.66	0.000125421
		391.8	0.00012237
		391.94	0.000119348
		392.08	0.000116357
		392.22	0.000113402
		392.36	0.000110476
		392.5	0.000107589
		392.64	0.00010474
		392.78	0.00010193
		392.92	9.91605e-05
		393.06	9.64331e-05
		393.2	9.37488e-05
		393.34	9.11091e-05
		393.48	8.85149e-05
		393.62	8.59674e-05
		393.76	8.34675e-05
		393.9	8.10162e-05
		394.04	7.86143e-05
		394.18	7.62626e-05
		394.32	7.39617e-05
		394.46	7.17122e-05
		394.6	6.95148e-05
		394.74	6.73698e-05
		394.88	6.52776e-05
		395.02	6.32387e-05
		395.16	6.12504e-05
		395.3	5.93187e-05
		395.44	5.74408e-05
		395.58	5.56167e-05
		395.72	5.38465e-05
		395.86	5.213e-05
		396	5.04672e-05
		396.14	4.88578e-05
		396.28	4.73018e-05
		396.42	4.57987e-05
		396.56	4.43483e-05
		396.7	4.29503e-05
		396.84	4.16042e-05
		396.98	4.03095e-05
		397.12	3.90659e-05
		397.26	3.78728e-05
		397.4	3.67296e-05
		397.54	3.56358e-05
		397.68	3.45908e-05
		397.82	3.35939e-05
		397.96	3.26445e-05
		398.1	3.17391e-05
		398.24	3.08829e-05
		398.38	3.00721e-05
		398.52	2.93061e-05
		398.66	2.85841e-05
		398.8	2.79054e-05
		398.94	2.72693e-05
		399.08	2.66749e-05
		399.22	2.61217e-05
		399.36	2.56089e-05
		399.5	2.51356e-05
		399.64	2.47013e-05
		399.78	2.43052e-05
		399.92	2.39465e-05
		400.06	2.36246e-05
		400.2	2.33388e-05
		400.34	2.30884e-05
		400.48	2.28728e-05
		400.62	2.26912e-05
		400.76	2.25431e-05
		400.9	2.24279e-05
		401.04	2.23449e-05
		401.18	2.22935e-05
		401.32	2.22733e-05
		401.46	2.22837e-05
		401.6	2.23213e-05
		401.74	2.23916e-05
		401.88	2.2491e-05
		402.02	2.26191e-05
		402.16	2.27754e-05
		402.3	2.29595e-05
		402.44	2.31711e-05
		402.58	2.34099e-05
		402.72	2.36754e-05
		402.86	2.39675e-05
		403	2.42858e-05
		403.14	2.46301e-05
		403.28	2.50003e-05
		403.42	2.5396e-05
		403.56	2.58172e-05
		403.7	2.62637e-05
		403.84	2.67355e-05
		403.98	2.72323e-05
		404.12	2.77542e-05
		404.26	2.83011e-05
		404.4	2.8873e-05
		404.54	2.94699e-05
		404.68	3.00918e-05
		404.82	3.07389e-05
		404.96	3.14112e-05
		405.1	3.21087e-05
		405.24	3.28317e-05
		405.38	3.35802e-05
		405.52	3.43545e-05
		405.66	3.51547e-05
		405.8	3.5981e-05
		405.94	3.68337e-05
		406.08	3.7713e-05
		406.22	3.86192e-05
		406.36	3.95525e-05
		406.5	4.05133e-05
		406.64	4.15019e-05
		406.78	4.25186e-05
		406.92	4.35637e-05
		407.06	4.46376e-05
		407.2	4.57407e-05
		407.34	4.68734e-05
		407.48	4.8036e-05
		407.62	4.9229e-05
		407.76	5.04527e-05
		407.9	5.17077e-05
		408.04	5.29943e-05
		408.18	5.4313e-05
		408.32	5.56642e-05
		408.46	5.70483e-05
		408.6	5.84659e-05
		408.74	5.99173e-05
		408.88	6.14031e-05
		409.02	6.29236e-05
		409.16	6.44794e-05
		409.3	6.60709e-05
		409.44	6.76957e-05
		409.58	6.93601e-05
		409.72	7.10616e-05
		409.86	7.28005e-05
		410	7.45773e-05
		410.14	7.63923e-05
		410.28	7.82461e-05
		410.42	8.0139e-05
		410.56	8.20714e-05
		410.7	8.40436e-05
		410.84	8.60561e-05
		410.98	8.81091e-05
		411.12	9.02029e-05
		411.26	9.23379e-05
		411.4	9.45144e-05
		411.54	9.67325e-05
		411.68	9.89925e-05
		411.82	0.000101295
		411.96	0.000103639
		412.1	0.000106026
		412.24	0.000108455
		412.38	0.000110927
		412.52	0.000113442
		412.66	0.000115999
		412.8	0.000118599
		412.94	0.000121242
		413.08	0.000123927
		413.22	0.000126654
		413.36	0.000129424
		413.5	0.000132235
		413.64	0.000135088
		413.78	0.000137983
		413.92	0.000140919
		414.06	0.000143895
		414.2	0.000146911
		414.34	0.000149967
		414.48	0.000153059
		414.62	0.000156193
		414.76	0.000159364
		414.9	0.000162573
		415.04	0.000165818
		415.18	0.000169098
		415.32	0.000172413
		415.46	0.000175762
		415.6	0.000179143
		415.74	0.000182556
		415.88	0.000185999
		416.02	0.000189472
		416.16	0.000192972
		416.3	0.0001965
		416.44	0.00020005
		416.58	0.000203627
		416.72	0.000207227
		416.86	0.000210848
		417	0.000214488
		417.14	0.000218146
		417.28	0.000221821
		417.42	0.00022551
		417.56	0.000229212
		417.7	0.000232924
		417.84	0.000236646
		417.98	0.000240375
		418.12	0.000244109
		418.26	0.000247845
		418.4	0.00025158
		418.54	0.000255317
		418.68	0.00025905
		418.82	0.000262778
		418.96	0.000266498
		419.1	0.000270208
		419.24	0.000273906
		419.38	0.000277589
		419.52	0.000281255
		419.66	0.000284901
		419.8	0.000288526
		419.94	0.000292126
		420.08	0.0002957
		420.22	0.000299245
		420.36	0.000302758
		420.5	0.000306236
		420.64	0.000309678
		420.78	0.000313081
		420.92	0.000316443
		421.06	0.00031976
		421.2	0.000323031
		421.34	0.000326253
		421.48	0.000329423
		421.62	0.000332539
		421.76	0.0003356
		421.9	0.000338601
		422.04	0.000341541
		422.18	0.000344418
		422.32	0.00034723
		422.46	0.000349973
		422.6	0.000352646
		422.74	0.000355247
		422.88	0.000357774
		423.02	0.000360224
		423.16	0.000362596
		423.3	0.000364887
		423.44	0.000367096
		423.58	0.00036922
		423.72	0.000371259
		423.86	0.000373209
		424	0.000375071
		424.14	0.000376842
		424.28	0.00037852
		424.42	0.000380105
		424.56	0.000381594
		424.7	0.000382987
		424.84	0.000384283
		424.98	0.00038548
		425.12	0.000386578
		425.26	0.000387575
		425.4	0.000388471
		425.54	0.000389264
		425.68	0.000389956
		425.82	0.000390544
		425.96	0.000391028
		426.1	0.000391409
		426.24	0.000391685
		426.38	0.000391857
		426.52	0.000391925
		426.66	0.000391888
		426.8	0.000391747
		426.94	0.000391502
		427.08	0.000391154
		427.22	0.000390702
		427.36	0.000390147
		427.5	0.00038949
		427.64	0.000388732
		427.78	0.000387873
		427.92	0.000386914
		428.06	0.000385856
		428.2	0.0003847
		428.34	0.000383448
		428.48	0.000382099
		428.62	0.000380657
		428.76	0.000379122
		428.9	0.000377495
		429.04	0.000375778
		429.18	0.000373972
		429.32	0.00037208
		429.46	0.000370103
		429.6	0.000368042
		429.74	0.0003659
		429.88	0.000363678
		430.02	0.000361378
		430.16	0.000359002
		430.3	0.000356553
		430.44	0.000354032
		430.58	0.000351441
		430.72	0.000348783
		430.86	0.000346059
		431	0.000343272
		431.14	0.000340425
		431.28	0.000337519
		431.42	0.000334556
		431.56	0.00033154
		431.7	0.000328472
		431.84	0.000325354
		431.98	0.00032219
		432.12	0.00031898
		432.26	0.000315729
		432.4	0.000312437
		432.54	0.000309108
		432.68	0.000305743
		432.82	0.000302346
		432.96	0.000298917
		433.1	0.000295461
		433.24	0.000291978
		433.38	0.000288471
		433.52	0.000284943
		433.66	0.000281396
		433.8	0.000277831
		433.94	0.000274252
		434.08	0.00027066
		434.22	0.000267057
		434.36	0.000263445
		434.5	0.000259827
		434.64	0.000256204
		434.78	0.000252579
		434.92	0.000248953
		435.06	0.000245328
		435.2	0.000241707
		435.34	0.00023809
		435.48	0.00023448
		435.62	0.000230878
		435.76	0.000227287
		435.9	0.000223706
		436.04	0.00022014
		436.18	0.000216588
		436.32	0.000213052
		436.46	0.000209533
		436.6	0.000206034
		436.74	0.000202555
		436.88	0.000199098
		437.02	0.000195663
		437.16	0.000192253
		437.3	0.000188867
		437.44	0.000185508
		437.58	0.000182176
		437.72	0.000178873
		437.86	0.000175598
		438	0.000172353
		438.14	0.00016914
		438.28	0.000165958
		438.42	0.000162808
		438.56	0.000159691
		438.7	0.000156608
		438.84	0.000153559
		438.98	0.000150545
		439.12	0.000147567
		439.26	0.000144624
		439.4	0.000141718
		439.54	0.000138848
		439.68	0.000136015
		439.82	0.000133219
		439.96	0.000130461
		440.1	0.000127741
		440.24	0.000125059
		440.38	0.000122415
		440.52	0.00011981
		440.66	0.000117242
		440.8	0.000114714
		440.94	0.000112223
		441.08	0.000109772
		441.22	0.000107359
		441.36	0.000104984
		441.5	0.000102648
		441.64	0.00010035
		441.78	9.80897e-05
		441.92	9.58679e-05
		442.06	9.3684e-05
		442.2	9.15378e-05
		442.34	8.94291e-05
		442.48	8.73577e-05
		442.62	8.53233e-05
		442.76	8.33257e-05
		442.9	8.13645e-05
		443.04	7.94396e-05
		443.18	7.75505e-05
		443.32	7.56971e-05
		443.46	7.38789e-05
		443.6	7.20956e-05
		443.74	7.03469e-05
		443.88	6.86324e-05
		444.02	6.69517e-05
		444.16	6.53045e-05
		444.3	6.36904e-05
		444.44	6.21089e-05
		444.58	6.05597e-05
		444.72	5.90423e-05
		444.86	5.75564e-05
		445	5.61016e-05
		445.14	5.46773e-05
		445.28	5.32833e-05
		445.42	5.1919e-05
		445.56	5.0584e-05
		445.7	4.9278e-05
		445.84	4.80004e-05
		445.98	4.67508e-05
		446.12	4.55289e-05
		446.26	4.43341e-05
		446.4	4.3166e-05
		446.54	4.20242e-05
		446.68	4.09083e-05
		446.82	3.98177e-05
		446.96	3.87522e-05
		447.1	3.77113e-05
		447.24	3.66944e-05
		447.38	3.57013e-05
		447.52	3.47315e-05
		447.66	3.37845e-05
		447.8	3.286e-05
		447.94	3.19575e-05
		448.08	3.10766e-05
		448.22	3.02169e-05
		448.36	2.9378e-05
		448.5	2.85595e-05
		448.64	2.77611e-05
		448.78	2.69822e-05
		448.92	2.62226e-05
		449.06	2.54819e-05
		449.2	2.47596e-05
		449.34	2.40553e-05
		449.48	2.33688e-05
		449.62	2.26997e-05
		449.76	2.20475e-05
		449.9	2.1412e-05
		450.04	2.07928e-05
		450.18	2.01895e-05
		450.32	1.96018e-05
		450.46	1.90294e-05
		450.6	1.84719e-05
		450.74	1.7929e-05
		450.88	1.74003e-05
		451.02	1.68857e-05
		451.16	1.63847e-05
		451.3	1.5897e-05
		451.44	1.54224e-05
		451.58	1.49605e-05
		451.72	1.45111e-05
		451.86	1.40738e-05
		452	1.36484e-05
		452.14	1.32346e-05
		452.28	1.28322e-05
		452.42	1.24408e-05
		452.56	1.20602e-05
		452.7	1.16902e-05
		452.84	1.13305e-05
		452.98	1.09808e-05
		453.12	1.06409e-05
		453.26	1.03105e-05
		453.4	9.98952e-06
		453.54	9.6776e-06
		453.68	9.37455e-06
		453.82	9.08016e-06
		453.96	8.79419e-06
		454.1	8.51644e-06
		454.24	8.24671e-06
		454.38	7.98478e-06
		454.52	7.73047e-06
		454.66	7.48356e-06
		454.8	7.24388e-06
		454.94	7.01123e-06
		455.08	6.78543e-06
		455.22	6.5663e-06
		455.36	6.35367e-06
		455.5	6.14737e-06
		455.64	5.94722e-06
		455.78	5.75306e-06
		455.92	5.56473e-06
		456.06	5.38209e-06
		456.2	5.20496e-06
		456.34	5.0332e-06
		456.48	4.86667e-06
		456.62	4.70523e-06
		456.76	4.54872e-06
		456.9	4.39702e-06
		457.04	4.25e-06
		457.18	4.10752e-06
		457.32	3.96946e-06
		457.46	3.83569e-06
		457.6	3.70609e-06
		457.74	3.58054e-06
		457.88	3.45894e-06
		458.02	3.34116e-06
		458.16	3.2271e-06
		458.3	3.11665e-06
		458.44	3.0097e-06
		458.58	2.90616e-06
		458.72	2.80593e-06
		458.86	2.70891e-06
		459	2.615e-06
		459.14	2.52412e-06
		459.28	2.43617e-06
		459.42	2.35107e-06
		459.56	2.26874e-06
		459.7	2.1863e-06
		459.84	2.10949e-06
		459.98	2.03519e-06
		460.12	1.96332e-06
		460.26	1.8938e-06
		460.4	1.82657e-06
		460.54	1.76156e-06
		460.68	1.6987e-06
		460.82	1.63793e-06
		460.96	1.57918e-06
		461.1	1.52239e-06
		461.24	1.4675e-06
		461.38	1.41445e-06
		461.52	1.36319e-06
		461.66	1.31366e-06
		461.8	1.26581e-06
		461.94	1.21959e-06
		462.08	1.17493e-06
		462.22	1.13181e-06
		462.36	1.09015e-06
		462.5	1.04993e-06
		462.64	1.0111e-06
		462.78	9.73603e-07
		462.92	9.37406e-07
		463.06	9.02466e-07
		463.2	8.68742e-07
		463.34	8.36196e-07
		463.48	8.04789e-07
		463.62	7.74485e-07
		463.76	7.45247e-07
		463.9	7.17041e-07
		464.04	6.89833e-07
		464.18	6.63591e-07
		464.32	6.38282e-07
		464.46	6.13876e-07
		464.6	5.90344e-07
		464.74	5.67655e-07
		464.88	5.45783e-07
		465.02	5.24699e-07
		465.16	5.04378e-07
		465.3	4.84794e-07
		465.44	4.65922e-07
		465.58	4.47738e-07
		465.72	4.30218e-07
		465.86	4.13341e-07
		466	3.97084e-07
		466.14	3.81426e-07
		466.28	3.66347e-07
		466.42	3.51826e-07
		466.56	3.37845e-07
		466.7	3.24385e-07
		466.84	3.11428e-07
		466.98	2.98956e-07
		467.12	2.86952e-07
		467.26	2.75401e-07
		467.4	2.64285e-07
		467.54	2.53591e-07
		467.68	2.43303e-07
		467.82	2.33406e-07
		467.96	2.23887e-07
		468.1	2.14733e-07
		468.24	2.0593e-07
		468.38	1.97466e-07
		468.52	1.89329e-07
		468.66	1.81506e-07
		468.8	1.73987e-07
		468.94	1.66761e-07
		469.08	1.59817e-07
		469.22	1.53145e-07
		469.36	1.46734e-07
		469.5	1.40576e-07
		469.64	1.3466e-07
		469.78	1.28979e-07
		469.92	1.23523e-07
		470.06	1.18285e-07
		470.2	1.10292e-07
		470.34	1.05668e-07
		470.48	1.01224e-07
		470.62	9.69537e-08
		470.76	9.28513e-08
		470.9	8.89105e-08
		471.04	8.51255e-08
		471.18	8.14907e-08
		471.32	7.80006e-08
		471.46	7.46499e-08
		471.6	7.14336e-08
		471.74	6.83466e-08
		471.88	6.53842e-08
		472.02	6.25418e-08
		472.16	5.9815e-08
		472.3	5.71993e-08
		472.44	5.46907e-08
		472.58	5.2285e-08
		472.72	4.99784e-08
		472.86	4.77672e-08
		473	4.56476e-08
		473.14	4.36163e-08
		473.28	4.16697e-08
		473.42	3.98047e-08
		473.56	3.8018e-08
		473.7	3.63066e-08
		473.84	3.46676e-08
		473.98	3.30981e-08
		474.12	3.15954e-08
		474.26	3.01569e-08
		474.4	2.87801e-08
		474.54	2.74623e-08
		474.68	2.62014e-08
		474.82	2.49951e-08
		474.96	2.3841e-08
		475.1	2.27372e-08
		475.24	2.16816e-08
		475.38	2.06722e-08
		475.52	1.97071e-08
		475.66	1.87846e-08
		475.8	1.79028e-08
		475.94	1.70602e-08
		476.08	1.6255e-08
		476.22	1.54857e-08
		476.36	1.47509e-08
		476.5	1.4049e-08
		476.64	1.33788e-08
		476.78	1.27387e-08
		476.92	1.21277e-08
		477.06	1.15445e-08
		477.2	1.09878e-08
		477.34	1.04565e-08
		477.48	9.9496e-09
		477.62	9.466e-09
		477.76	9.00468e-09
		477.9	8.5647e-09
		478.04	8.14512e-09
		478.18	7.74505e-09
		478.32	7.36364e-09
		478.46	7.00007e-09
		478.6	6.65356e-09
		478.74	6.32335e-09
		478.88	6.00872e-09
		479.02	5.70897e-09
		479.16	5.42345e-09
		479.3	5.15152e-09
		479.44	4.89256e-09
		479.58	4.646e-09
		479.72	4.41126e-09
		479.86	4.18783e-09
[truncated: 1 more rows]

## Sheet: PlotDat13
Source sheet	Late Permian rocks	200	0	236.4	0	200	0
Plot name	ProbDens10	200.14	0	239.2	0	479.86	0
Plot Type	16	200.28	0	239.2	2
1st free col	9	200.42	0	236.4	2
Sigma Level	1	200.56	0	236.4	0
Absolute Errs	TRUE	200.7	0	ErrBox	ErrBox
Symbol Type	1	200.84	0	239.2	0
Inverse Plot	FALSE	200.98	0	242	0
Color Plot	FALSE	201.12	0	242	6
3D plot	FALSE	201.26	0	239.2	6
Linear	FALSE	201.4	0	239.2	0
Data Range	AA1:AB406	201.54	0	ErrBox	ErrBox
Filled Symbols	FALSE	201.68	0	242	0
ConcAge	FALSE	201.82	0	244.8	0
ConcSwap	FALSE	201.96	0	244.8	8
1st Symbol-row	1	202.1	0	242	8
		202.24	0	242	0
		202.38	0	ErrBox	ErrBox
		202.52	0	244.8	0
		202.66	0	247.6	0
		202.8	0	247.6	5
		202.94	0	244.8	5
		203.08	0	244.8	0
		203.22	0	ErrBox	ErrBox
		203.36	0	247.6	0
		203.5	0	250.4	0
		203.64	0	250.4	10
		203.78	0	247.6	10
		203.92	3.10552e-09	247.6	0
		204.06	3.38372e-09	ErrBox	ErrBox
		204.2	3.68558e-09	250.4	0
		204.34	4.013e-09	253.2	0
		204.48	4.36802e-09	253.2	13
		204.62	4.75283e-09	250.4	13
		204.76	5.16977e-09	250.4	0
		204.9	5.62137e-09	ErrBox	ErrBox
		205.04	6.11033e-09	253.2	0
		205.18	6.63956e-09	256	0
		205.32	7.21216e-09	256	14
		205.46	7.83148e-09	253.2	14
		205.6	8.50108e-09	253.2	0
		205.74	9.22478e-09	ErrBox	ErrBox
		205.88	1.00067e-08	256	0
		206.02	1.08511e-08	258.8	0
		206.16	1.17629e-08	258.8	19
		206.3	1.27468e-08	256	19
		206.44	1.38084e-08	256	0
		206.58	1.49533e-08	ErrBox	ErrBox
		206.72	1.61876e-08	258.8	0
		206.86	1.75177e-08	261.6	0
		207	1.89508e-08	261.6	26
		207.14	2.0494e-08	258.8	26
		207.28	2.21554e-08	258.8	0
		207.42	2.39433e-08	ErrBox	ErrBox
		207.56	2.58666e-08	261.6	0
		207.7	2.79349e-08	264.4	0
		207.84	3.01583e-08	264.4	21
		207.98	3.25476e-08	261.6	21
		208.12	3.51141e-08	261.6	0
		208.26	4.08995e-08	ErrBox	ErrBox
		208.4	4.71564e-08	264.4	0
		208.54	5.09636e-08	267.2	0
		208.68	5.50617e-08	267.2	28
		208.82	5.94716e-08	264.4	28
		208.96	6.42154e-08	264.4	0
		209.1	6.9317e-08	ErrBox	ErrBox
		209.24	7.48015e-08	267.2	0
		209.38	8.0696e-08	270	0
		209.52	8.70289e-08	270	14
		209.66	9.3831e-08	267.2	14
		209.8	1.01135e-07	267.2	0
		209.94	1.08974e-07	ErrBox	ErrBox
		210.08	1.17387e-07	270	0
		210.22	1.26411e-07	272.8	0
		210.36	1.36089e-07	272.8	17
		210.5	1.46464e-07	270	17
		210.64	1.57583e-07	270	0
		210.78	1.69497e-07	ErrBox	ErrBox
		210.92	1.82257e-07	272.8	0
		211.06	1.95919e-07	275.6	0
		211.2	2.10543e-07	275.6	13
		211.34	2.26192e-07	272.8	13
		211.48	2.42931e-07	272.8	0
		211.62	2.60833e-07	ErrBox	ErrBox
		211.76	2.7997e-07	275.6	0
		211.9	3.00423e-07	278.4	0
		212.04	3.22274e-07	278.4	5
		212.18	3.45611e-07	275.6	5
		212.32	3.7053e-07	275.6	0
		212.46	3.97126e-07	ErrBox	ErrBox
		212.6	4.25506e-07	278.4	0
		212.74	4.55778e-07	281.2	0
		212.88	4.88059e-07	281.2	4
		213.02	5.22471e-07	278.4	4
		213.16	5.59144e-07	278.4	0
		213.3	5.98212e-07	ErrBox	ErrBox
		213.44	6.39819e-07	281.2	0
		213.58	6.84117e-07	284	0
		213.72	7.31263e-07	284	4
		213.86	7.81425e-07	281.2	4
		214	8.34778e-07	281.2	0
		214.14	8.91508e-07	ErrBox	ErrBox
		214.28	9.51808e-07	284	0
		214.42	1.01588e-06	286.8	0
		214.56	1.08394e-06	286.8	6
		214.7	1.15622e-06	284	6
		214.84	1.23294e-06	284	0
		214.98	1.31751e-06	ErrBox	ErrBox
		215.12	1.4041e-06	286.8	0
		215.26	1.49593e-06	289.6	0
		215.4	1.59329e-06	289.6	3
		215.54	1.69964e-06	286.8	3
		215.68	1.81269e-06	286.8	0
		215.82	1.9294e-06	ErrBox	ErrBox
		215.96	2.05303e-06	289.6	0
		216.1	2.19037e-06	292.4	0
		216.24	2.33289e-06	292.4	3
		216.38	2.4809e-06	289.6	3
		216.52	2.63759e-06	289.6	0
		216.66	2.80341e-06	ErrBox	ErrBox
		216.8	2.97886e-06	292.4	0
		216.94	3.16443e-06	295.2	0
		217.08	3.36066e-06	295.2	4
		217.22	3.57141e-06	292.4	4
		217.36	3.79103e-06	292.4	0
		217.5	4.02309e-06	ErrBox	ErrBox
		217.64	4.27137e-06	295.2	0
		217.78	4.53045e-06	298	0
		217.92	4.80402e-06	298	9
		218.06	5.0928e-06	295.2	9
		218.2	5.39758e-06	295.2	0
		218.34	5.71914e-06	ErrBox	ErrBox
		218.48	6.05835e-06	298	0
		218.62	6.41609e-06	300.8	0
		218.76	6.79327e-06	300.8	9
		218.9	7.19385e-06	298	9
		219.04	7.61328e-06	298	0
		219.18	8.05525e-06	ErrBox	ErrBox
		219.32	8.52085e-06	300.8	0
		219.46	9.01126e-06	303.6	0
		219.6	9.5339e-06	303.6	4
		219.74	1.00782e-05	300.8	4
		219.88	1.06512e-05	300.8	0
		220.02	1.12543e-05	ErrBox	ErrBox
		220.16	1.18889e-05	303.6	0
		220.3	1.25566e-05	306.4	0
		220.44	1.32589e-05	306.4	4
		220.58	1.39975e-05	303.6	4
		220.72	1.47741e-05	303.6	0
		220.86	1.55906e-05	ErrBox	ErrBox
		221	1.64489e-05	306.4	0
		221.14	1.73509e-05	309.2	0
		221.28	1.82988e-05	309.2	8
		221.42	1.92946e-05	306.4	8
		221.56	2.03406e-05	306.4	0
		221.7	2.14426e-05	ErrBox	ErrBox
		221.84	2.25968e-05	309.2	0
		221.98	2.38088e-05	312	0
		222.12	2.50941e-05	312	11
		222.26	2.64319e-05	309.2	11
		222.4	2.78394e-05	309.2	0
		222.54	2.93138e-05	ErrBox	ErrBox
		222.68	3.08642e-05	312	0
		222.82	3.24884e-05	314.8	0
		222.96	3.41926e-05	314.8	8
		223.1	3.59805e-05	312	8
		223.24	3.78561e-05	312	0
		223.38	3.98235e-05	ErrBox	ErrBox
		223.52	4.18869e-05	314.8	0
		223.66	4.40509e-05	317.6	0
		223.8	4.632e-05	317.6	3
		223.94	4.86993e-05	314.8	3
		224.08	5.11969e-05	314.8	0
		224.22	5.38122e-05	ErrBox	ErrBox
		224.36	5.65537e-05	317.6	0
		224.5	5.94271e-05	320.4	0
		224.64	6.24419e-05	320.4	4
		224.78	6.56048e-05	317.6	4
		224.92	6.89164e-05	317.6	0
		225.06	7.23837e-05	ErrBox	ErrBox
		225.2	7.60166e-05	320.4	0
		225.34	7.98259e-05	323.2	0
		225.48	8.38138e-05	323.2	3
		225.62	8.79913e-05	320.4	3
		225.76	9.23672e-05	320.4	0
		225.9	9.6957e-05	ErrBox	ErrBox
		226.04	0.000101758	323.2	0
		226.18	0.000106787	326	0
		226.32	0.000112056	326	6
		226.46	0.000117573	323.2	6
		226.6	0.000123348	323.2	0
		226.74	0.000129397	ErrBox	ErrBox
		226.88	0.000135731	326	0
		227.02	0.000142362	328.8	0
		227.16	0.000149307	328.8	3
		227.3	0.000156574	326	3
		227.44	0.000164181	326	0
		227.58	0.000172147	ErrBox	ErrBox
		227.72	0.000180477	328.8	0
		227.86	0.000189195	331.6	0
		228	0.000198317	331.6	2
		228.14	0.000207863	328.8	2
		228.28	0.000217849	328.8	0
		228.42	0.000228299	ErrBox	ErrBox
		228.56	0.00023923	331.6	0
		228.7	0.000250667	334.4	0
		228.84	0.000262628	334.4	5
		228.98	0.000275132	331.6	5
		229.12	0.000288205	331.6	0
		229.26	0.000301871	ErrBox	ErrBox
		229.4	0.000316158	334.4	0
		229.54	0.000331082	337.2	0
		229.68	0.000346673	337.2	5
		229.82	0.000362959	334.4	5
		229.96	0.00037997	334.4	0
		230.1	0.000397727	ErrBox	ErrBox
		230.24	0.000416265	337.2	0
		230.38	0.000435608	340	0
		230.52	0.000455784	340	2
		230.66	0.000476823	337.2	2
		230.8	0.000498759	337.2	0
		230.94	0.000521615	ErrBox	ErrBox
		231.08	0.000545424	340	0
		231.22	0.000570214	342.8	0
		231.36	0.00059602	342.8	3
		231.5	0.000622874	340	3
		231.64	0.000650792	340	0
		231.78	0.000679806	ErrBox	ErrBox
		231.92	0.000709946	345.6	0
		232.06	0.000741239	348.4	0
		232.2	0.000773711	348.4	4
		232.34	0.00080739	345.6	4
		232.48	0.000842299	345.6	0
		232.62	0.000878469	ErrBox	ErrBox
		232.76	0.000915901	348.4	0
		232.9	0.000954631	351.2	0
		233.04	0.000994669	351.2	4
		233.18	0.00103603	348.4	4
		233.32	0.00107874	348.4	0
		233.46	0.0011228	ErrBox	ErrBox
		233.6	0.00116823	351.2	0
		233.74	0.00121503	354	0
		233.88	0.00126321	354	2
		234.02	0.00131277	351.2	2
		234.16	0.00136372	351.2	0
		234.3	0.00141606	ErrBox	ErrBox
		234.44	0.00146978	354	0
		234.58	0.00152488	356.8	0
		234.72	0.00158135	356.8	2
		234.86	0.00163918	354	2
		235	0.00169836	354	0
		235.14	0.00175887	ErrBox	ErrBox
		235.28	0.00182069	356.8	0
		235.42	0.00188383	359.6	0
		235.56	0.00194824	359.6	1
		235.7	0.00201392	356.8	1
		235.84	0.00208084	356.8	0
		235.98	0.00214897	ErrBox	ErrBox
		236.12	0.00221829	359.6	0
		236.26	0.00228878	362.4	0
		236.4	0.00236039	362.4	2
		236.54	0.00243313	359.6	2
		236.68	0.00250694	359.6	0
		236.82	0.00258181	ErrBox	ErrBox
		236.96	0.0026577	370.8	0
		237.1	0.00273458	373.6	0
		237.24	0.00281244	373.6	2
		237.38	0.00289123	370.8	2
		237.52	0.00297093	370.8	0
		237.66	0.00305152	ErrBox	ErrBox
		237.8	0.00313296	384.8	0
		237.94	0.00321523	387.6	0
		238.08	0.0032983	387.6	1
		238.22	0.00338216	384.8	1
		238.36	0.00346678	384.8	0
		238.5	0.00355214	ErrBox	ErrBox
		238.64	0.0036382	424	0
		238.78	0.00372495	426.8	0
		238.92	0.00381238	426.8	2
		239.06	0.00390045	424	2
		239.2	0.00398916	424	0
		239.34	0.00407848	ErrBox	ErrBox
		239.48	0.0041684	426.8	0
		239.62	0.00425891	429.6	0
		239.76	0.00434998	429.6	1
		239.9	0.00444161	426.8	1
		240.04	0.00453377	426.8	0
		240.18	0.00462645	ErrBox	ErrBox
		240.32	0.00471964
		240.46	0.00481332
		240.6	0.00490748
		240.74	0.00500212
		240.88	0.0050972
		241.02	0.00519273
		241.16	0.00528869
		241.3	0.00538507
		241.44	0.00548185
		241.58	0.00557902
		241.72	0.00567657
		241.86	0.0057745
		242	0.00587279
		242.14	0.00597142
		242.28	0.00607039
		242.42	0.00616968
		242.56	0.0062693
		242.7	0.00636922
		242.84	0.00646945
		242.98	0.00656997
		243.12	0.0066708
		243.26	0.00677191
		243.4	0.0068733
		243.54	0.00697498
		243.68	0.00707694
		243.82	0.00717919
		243.96	0.00728172
		244.1	0.00738456
		244.24	0.0074877
		244.38	0.00759114
		244.52	0.00769489
		244.66	0.00779897
		244.8	0.00790339
		244.94	0.00800817
		245.08	0.00811331
		245.22	0.00821884
		245.36	0.00832476
		245.5	0.00843111
		245.64	0.0085379
		245.78	0.00864515
		245.92	0.00875286
		246.06	0.00886109
		246.2	0.00896982
		246.34	0.0090791
		246.48	0.00918894
		246.62	0.00929937
		246.76	0.00941039
		246.9	0.00952203
		247.04	0.00963431
		247.18	0.00974724
		247.32	0.00986085
		247.46	0.00997513
		247.6	0.0100901
		247.74	0.0102058
		247.88	0.0103222
		248.02	0.0104394
		248.16	0.0105572
		248.3	0.0106758
		248.44	0.0107951
		248.58	0.0109152
		248.72	0.011036
		248.86	0.0111575
		249	0.0112798
		249.14	0.0114027
		249.28	0.0115263
		249.42	0.0116507
		249.56	0.0117757
		249.7	0.0119013
		249.84	0.0120276
		249.98	0.0121545
		250.12	0.012282
		250.26	0.0124101
		250.4	0.0125388
		250.54	0.012668
		250.68	0.0127978
		250.82	0.0129281
		250.96	0.0130588
		251.1	0.0131901
		251.24	0.0133218
		251.38	0.0134539
		251.52	0.0135865
		251.66	0.0137196
		251.8	0.013853
		251.94	0.0139868
		252.08	0.0141211
		252.22	0.0142558
		252.36	0.0143908
		252.5	0.0145263
		252.64	0.0146622
		252.78	0.0147984
		252.92	0.0149351
		253.06	0.0150722
		253.2	0.0152098
		253.34	0.0153478
		253.48	0.0154862
		253.62	0.0156251
		253.76	0.0157644
		253.9	0.0159042
		254.04	0.0160445
		254.18	0.0161853
		254.32	0.0163266
		254.46	0.0164683
		254.6	0.0166106
		254.74	0.0167533
		254.88	0.0168965
		255.02	0.0170402
		255.16	0.0171843
		255.3	0.0173288
		255.44	0.0174738
		255.58	0.0176191
		255.72	0.0177647
		255.86	0.0179106
		256	0.0180567
		256.14	0.018203
		256.28	0.0183494
		256.42	0.0184958
		256.56	0.0186421
		256.7	0.0187884
		256.84	0.0189344
		256.98	0.0190801
		257.12	0.0192254
		257.26	0.0193701
		257.4	0.0195142
		257.54	0.0196575
		257.68	0.0197999
		257.82	0.0199413
		257.96	0.0200816
		258.1	0.0202205
		258.24	0.0203581
		258.38	0.020494
		258.52	0.0206282
		258.66	0.0207606
		258.8	0.0208909
		258.94	0.0210191
		259.08	0.0211449
		259.22	0.0212682
		259.36	0.021389
		259.5	0.0215069
		259.64	0.0216219
		259.78	0.0217339
		259.92	0.0218426
		260.06	0.021948
		260.2	0.0220499
		260.34	0.0221481
		260.48	0.0222426
		260.62	0.0223332
		260.76	0.0224197
		260.9	0.0225021
		261.04	0.0225803
		261.18	0.022654
		261.32	0.0227233
		261.46	0.022788
		261.6	0.022848
		261.74	0.0229032
		261.88	0.0229535
		262.02	0.0229989
		262.16	0.0230393
		262.3	0.0230745
		262.44	0.0231046
		262.58	0.0231295
		262.72	0.0231491
		262.86	0.0231634
		263	0.0231723
		263.14	0.0231758
		263.28	0.0231739
		263.42	0.0231665
		263.56	0.0231537
		263.7	0.0231354
		263.84	0.0231116
		263.98	0.0230824
		264.12	0.0230477
		264.26	0.0230076
		264.4	0.022962
		264.54	0.022911
		264.68	0.0228547
		264.82	0.0227931
		264.96	0.0227263
		265.1	0.0226542
		265.24	0.022577
		265.38	0.0224947
		265.52	0.0224075
		265.66	0.0223153
		265.8	0.0222183
		265.94	0.0221165
		266.08	0.0220102
		266.22	0.0218993
		266.36	0.0217839
		266.5	0.0216643
		266.64	0.0215404
		266.78	0.0214125
		266.92	0.0212806
		267.06	0.0211449
		267.2	0.0210054
		267.34	0.0208624
		267.48	0.020716
		267.62	0.0205662
		267.76	0.0204133
		267.9	0.0202573
		268.04	0.0200985
		268.18	0.0199369
		268.32	0.0197727
		268.46	0.019606
		268.6	0.0194369
		268.74	0.0192656
		268.88	0.0190923
		269.02	0.018917
		269.16	0.0187399
		269.3	0.0185611
		269.44	0.0183808
		269.58	0.018199
		269.72	0.0180159
		269.86	0.0178316
		270	0.0176462
		270.14	0.0174598
		270.28	0.0172726
		270.42	0.0170846
		270.56	0.0168959
		270.7	0.0167067
		270.84	0.0165171
		270.98	0.016327
		271.12	0.0161367
		271.26	0.0159461
		271.4	0.0157555
		271.54	0.0155648
		271.68	0.0153742
		271.82	0.0151837
		271.96	0.0149933
		272.1	0.0148033
		272.24	0.0146135
		272.38	0.0144242
		272.52	0.0142353
		272.66	0.0140469
		272.8	0.0138592
		272.94	0.013672
		273.08	0.0134856
		273.22	0.0132999
		273.36	0.0131151
		273.5	0.0129311
		273.64	0.0127481
		273.78	0.012566
		273.92	0.0123851
		274.06	0.0122052
		274.2	0.0120264
		274.34	0.0118489
		274.48	0.0116727
		274.62	0.0114977
		274.76	0.0113242
		274.9	0.0111521
		275.04	0.0109815
		275.18	0.0108125
		275.32	0.010645
		275.46	0.0104793
		275.6	0.0103152
		275.74	0.010153
		275.88	0.00999252
		276.02	0.00983398
		276.16	0.0096774
		276.3	0.00952281
		276.44	0.00937028
		276.58	0.00921986
		276.72	0.00907161
		276.86	0.00892557
		277	0.00878179
		277.14	0.00864033
		277.28	0.00850122
		277.42	0.00836452
		277.56	0.00823026
		277.7	0.00809849
		277.84	0.00796926
		277.98	0.00784258
		278.12	0.00771849
		278.26	0.00759704
		278.4	0.00747824
		278.54	0.00736211
		278.68	0.00724869
		278.82	0.00713799
		278.96	0.00703002
		279.1	0.00692479
		279.24	0.00682232
		279.38	0.00672261
		279.52	0.00662566
		279.66	0.00653148
		279.8	0.00644004
		279.94	0.00635135
		280.08	0.00626539
		280.22	0.00618215
		280.36	0.00610161
		280.5	0.00602374
		280.64	0.00594853
		280.78	0.00587594
		280.92	0.00580593
		281.06	0.00573849
		281.2	0.00567357
		281.34	0.00561113
		281.48	0.00555113
		281.62	0.00549353
		281.76	0.00543828
		281.9	0.00538532
		282.04	0.00533463
		282.18	0.00528614
		282.32	0.00523981
		282.46	0.00519557
		282.6	0.00515339
		282.74	0.0051132
		282.88	0.00507494
		283.02	0.00503857
		283.16	0.00500402
		283.3	0.00497125
		283.44	0.0049402
		283.58	0.00491081
		283.72	0.00488303
		283.86	0.0048568
		284	0.00483208
		284.14	0.00480883
		284.28	0.00478697
		284.42	0.00476647
		284.56	0.00474729
		284.7	0.00472937
		284.84	0.00471267
		284.98	0.00469715
		285.12	0.00468279
		285.26	0.00466952
		285.4	0.00465732
		285.54	0.00464616
		285.68	0.00463601
		285.82	0.00462683
		285.96	0.0046186
		286.1	0.00461131
		286.24	0.00460492
		286.38	0.00459942
		286.52	0.00459479
		286.66	0.00459101
		286.8	0.00458808
		286.94	0.00458599
		287.08	0.00458472
		287.22	0.00458427
		287.36	0.00458464
		287.5	0.00458582
		287.64	0.00458783
		287.78	0.00459066
		287.92	0.00459431
		288.06	0.0045988
		288.2	0.00460412
		288.34	0.00461031
		288.48	0.00461736
		288.62	0.00462528
		288.76	0.00463409
		288.9	0.00464381
		289.04	0.00465446
		289.18	0.00466604
		289.32	0.00467858
		289.46	0.00469209
		289.6	0.00470659
		289.74	0.00472209
		289.88	0.00473862
		290.02	0.0047562
		290.16	0.00477483
		290.3	0.00479452
		290.44	0.00481531
		290.58	0.00483721
		290.72	0.00486021
		290.86	0.00488433
		291	0.00490957
		291.14	0.00493596
		291.28	0.00496348
		291.42	0.00499213
		291.56	0.00502192
		291.7	0.00505283
		291.84	0.00508486
		291.98	0.00511799
		292.12	0.00515222
		292.26	0.00518751
		292.4	0.00522386
		292.54	0.00526122
		292.68	0.00529957
		292.82	0.00533888
		292.96	0.0053791
		293.1	0.0054202
		293.24	0.00546212
		293.38	0.00550482
		293.52	0.00554824
		293.66	0.00559233
		293.8	0.00563702
		293.94	0.00568226
		294.08	0.00572796
		294.22	0.00577406
		294.36	0.00582049
		294.5	0.00586717
		294.64	0.00591403
		294.78	0.00596099
		294.92	0.00600796
		295.06	0.00605487
		295.2	0.00610163
		295.34	0.00614817
		295.48	0.0061944
		295.62	0.00624025
		295.76	0.00628562
		295.9	0.00633045
		296.04	0.00637465
		296.18	0.00641816
		296.32	0.00646089
		296.46	0.0065028
		296.6	0.0065438
		296.74	0.00658383
		296.88	0.00662284
		297.02	0.00666077
		297.16	0.00669758
		297.3	0.00673322
		297.44	0.00676765
		297.58	0.00680084
		297.72	0.00683276
		297.86	0.00686338
		298	0.00689269
		298.14	0.00692066
		298.28	0.0069473
		298.42	0.00697259
		298.56	0.00699655
		298.7	0.00701917
		298.84	0.00704046
		298.98	0.00706045
		299.12	0.00707915
		299.26	0.00709659
		299.4	0.0071128
		299.54	0.0071278
		299.68	0.00714164
		299.82	0.00715436
		299.96	0.00716598
		300.1	0.00717657
		300.24	0.00718616
		300.38	0.0071948
		300.52	0.00720255
		300.66	0.00720945
		300.8	0.00721555
		300.94	0.0072209
		301.08	0.00722557
		301.22	0.0072296
		301.36	0.00723305
		301.5	0.00723596
		301.64	0.00723839
		301.78	0.00724039
		301.92	0.007242
		302.06	0.00724329
		302.2	0.00724428
		302.34	0.00724504
		302.48	0.0072456
		302.62	0.007246
		302.76	0.00724627
		302.9	0.00724647
		303.04	0.00724662
		303.18	0.00724675
		303.32	0.00724689
		303.46	0.00724707
		303.6	0.00724732
		303.74	0.00724766
		303.88	0.0072481
		304.02	0.00724867
		304.16	0.00724937
		304.3	0.00725023
		304.44	0.00725125
		304.58	0.00725243
		304.72	0.00725378
		304.86	0.00725529
		305	0.00725698
		305.14	0.00725884
		305.28	0.00726086
		305.42	0.00726303
		305.56	0.00726534
		305.7	0.00726779
		305.84	0.00727035
		305.98	0.007273
		306.12	0.00727574
		306.26	0.00727853
		306.4	0.00728136
		306.54	0.00728419
		306.68	0.007287
		306.82	0.00728976
		306.96	0.00729244
		307.1	0.00729502
		307.24	0.00729745
		307.38	0.0072997
		307.52	0.00730173
		307.66	0.00730351
		307.8	0.00730499
		307.94	0.00730614
		308.08	0.00730692
		308.22	0.00730729
		308.36	0.0073072
		308.5	0.00730662
		308.64	0.0073055
		308.78	0.0073038
		308.92	0.00730147
		309.06	0.00729848
		309.2	0.00729479
		309.34	0.00729035
		309.48	0.00728513
		309.62	0.00727909
		309.76	0.00727218
		309.9	0.00726438
		310.04	0.00725564
		310.18	0.00724595
		310.32	0.00723525
		310.46	0.00722353
		310.6	0.00721077
		310.74	0.00719692
		310.88	0.00718198
		311.02	0.00716593
		311.16	0.00714874
		311.3	0.0071304
		311.44	0.00711091
		311.58	0.00709025
		311.72	0.00706842
		311.86	0.00704542
		312	0.00702126
		312.14	0.00699592
		312.28	0.00696944
		312.42	0.0069418
		312.56	0.00691304
		312.7	0.00688316
		312.84	0.00685219
		312.98	0.00682016
		313.12	0.00678709
		313.26	0.00675302
		313.4	0.00671796
		313.54	0.00668197
		313.68	0.00664508
		313.82	0.00660732
		313.96	0.00656876
		314.1	0.00652942
		314.24	0.00648936
		314.38	0.00644863
		314.52	0.00640727
		314.66	0.00636534
		314.8	0.00632288
		314.94	0.00627996
		315.08	0.00623664
		315.22	0.00619296
		315.36	0.00614898
		315.5	0.00610476
		315.64	0.00606034
		315.78	0.0060158
		315.92	0.00597117
		316.06	0.00592652
		316.2	0.00588189
		316.34	0.00583735
		316.48	0.00579293
		316.62	0.00574869
		316.76	0.00570468
		316.9	0.00566094
		317.04	0.00561752
		317.18	0.00557445
		317.32	0.00553178
		317.46	0.00548954
		317.6	0.00544778
		317.74	0.00540652
		317.88	0.00536579
		318.02	0.00532562
		318.16	0.00528605
		318.3	0.00524708
		318.44	0.00520876
		318.58	0.00517109
		318.72	0.00513409
		318.86	0.00509778
		319	0.00506217
		319.14	0.00502727
		319.28	0.00499308
		319.42	0.00495961
		319.56	0.00492688
		319.7	0.00489488
		319.84	0.00486361
		319.98	0.00483307
		320.12	0.00480326
		320.26	0.00477418
		320.4	0.00474581
		320.54	0.00471816
		320.68	0.00469121
		320.82	0.00466496
		320.96	0.00463939
		321.1	0.0046145
		321.24	0.00459027
		321.38	0.0045667
		321.52	0.00454377
		321.66	0.00452146
		321.8	0.00449977
		321.94	0.00447868
		322.08	0.00445817
		322.22	0.00443824
		322.36	0.00441887
		322.5	0.00440004
		322.64	0.00438174
		322.78	0.00436396
		322.92	0.00434667
		323.06	0.00432988
		323.2	0.00431356
		323.34	0.0042977
		323.48	0.00428229
		323.62	0.00426732
		323.76	0.00425277
		323.9	0.00423863
		324.04	0.00422489
		324.18	0.00421154
		324.32	0.00419857
		324.46	0.00418596
		324.6	0.0041737
		324.74	0.0041618
		324.88	0.00415023
		325.02	0.00413898
		325.16	0.00412805
		325.3	0.00411743
		325.44	0.00410711
		325.58	0.00409708
		325.72	0.00408733
		325.86	0.00407786
		326	0.00406865
		326.14	0.00405971
		326.28	0.00405101
		326.42	0.00404256
		326.56	0.00403435
		326.7	0.00402637
		326.84	0.00401861
		326.98	0.00401108
		327.12	0.00400375
		327.26	0.00399662
		327.4	0.0039897
		327.54	0.00398296
		327.68	0.00397641
		327.82	0.00397003
		327.96	0.00396383
		328.1	0.00395779
		328.24	0.00395191
		328.38	0.00394618
		328.52	0.00394059
		328.66	0.00393514
		328.8	0.00392983
		328.94	0.00392463
		329.08	0.00391956
		329.22	0.00391459
		329.36	0.00390973
		329.5	0.00390496
		329.64	0.00390028
		329.78	0.00389569
		329.92	0.00389116
		330.06	0.0038867
		330.2	0.00388231
		330.34	0.00387797
		330.48	0.00387367
		330.62	0.00386941
		330.76	0.00386517
		330.9	0.00386096
		331.04	0.00385676
		331.18	0.00385258
		331.32	0.00384839
		331.46	0.00384419
		331.6	0.00383998
		331.74	0.00383574
		331.88	0.00383148
		332.02	0.00382717
		332.16	0.00382282
		332.3	0.00381842
		332.44	0.00381395
		332.58	0.00380942
		332.72	0.0038048
		332.86	0.00380011
		333	0.00379532
		333.14	0.00379044
		333.28	0.00378546
		333.42	0.00378036
		333.56	0.00377514
		333.7	0.0037698
		333.84	0.00376432
		333.98	0.00375872
		334.12	0.00375297
		334.26	0.00374707
		334.4	0.00374101
		334.54	0.0037348
		334.68	0.00372842
		334.82	0.00372186
		334.96	0.00371514
		335.1	0.00370823
		335.24	0.00370113
		335.38	0.00369384
		335.52	0.00368637
		335.66	0.0036787
		335.8	0.00367082
		335.94	0.00366275
		336.08	0.00365447
		336.22	0.00364599
		336.36	0.00363729
		336.5	0.00362839
		336.64	0.00361926
		336.78	0.00360993
		336.92	0.00360039
		337.06	0.00359063
		337.2	0.00358066
		337.34	0.00357048
		337.48	0.00356008
		337.62	0.00354948
		337.76	0.00353867
		337.9	0.00352765
		338.04	0.00351643
		338.18	0.00350501
		338.32	0.00349339
		338.46	0.00348158
		338.6	0.00346958
		338.74	0.00345739
		338.88	0.00344502
		339.02	0.00343248
		339.16	0.00341976
		339.3	0.00340688
		339.44	0.00339384
		339.58	0.00338065
		339.72	0.0033673
		339.86	0.00335382
		340	0.0033402
		340.14	0.00332646
		340.28	0.00331259
		340.42	0.00329861
		340.56	0.00328452
		340.7	0.00327033
		340.84	0.00325604
		340.98	0.00324167
		341.12	0.00322723
		341.26	0.00321271
		341.4	0.00319812
		341.54	0.00318348
		341.68	0.00316879
		341.82	0.00315406
		341.96	0.00313929
		342.1	0.00312448
		342.24	0.00310966
		342.38	0.00309482
		342.52	0.00307996
		342.66	0.00306509
		342.8	0.00305023
		342.94	0.00303537
		343.08	0.00302052
		343.22	0.00300568
		343.36	0.00299086
		343.5	0.00297606
		343.64	0.00296129
		343.78	0.00294655
		343.92	0.00293183
		344.06	0.00291715
		344.2	0.0029025
		344.34	0.00288789
		344.48	0.00287332
		344.62	0.00285879
		344.76	0.00284431
		344.9	0.00282985
		345.04	0.00281545
		345.18	0.00280108
		345.32	0.00278676
		345.46	0.00277247
		345.6	0.00275822
		345.74	0.002744
		345.88	0.00272983
		346.02	0.00271569
		346.16	0.00270157
		346.3	0.00268749
		346.44	0.00267344
		346.58	0.0026594
		346.72	0.00264539
		346.86	0.0026314
		347	0.00261743
		347.14	0.00260347
		347.28	0.00258952
		347.42	0.00257558
		347.56	0.00256165
		347.7	0.00254772
		347.84	0.00253378
		347.98	0.00251985
		348.12	0.00250591
		348.26	0.00249196
		348.4	0.00247801
		348.54	0.00246404
		348.68	0.00245006
		348.82	0.00243606
		348.96	0.00242205
		349.1	0.00240801
		349.24	0.00239396
		349.38	0.00237989
		349.52	0.0023658
		349.66	0.00235168
		349.8	0.00233755
		349.94	0.00232339
		350.08	0.00230922
		350.22	0.00229502
		350.36	0.0022808
		350.5	0.00226657
		350.64	0.00225231
		350.78	0.00223804
		350.92	0.00222376
		351.06	0.00220947
		351.2	0.00219516
		351.34	0.00218085
		351.48	0.00216653
		351.62	0.00215221
		351.76	0.0021379
		351.9	0.00212358
		352.04	0.00210927
		352.18	0.00209497
		352.32	0.00208068
		352.46	0.00206641
		352.6	0.00205216
		352.74	0.00203794
		352.88	0.00202374
		353.02	0.00200956
		353.16	0.00199543
		353.3	0.00198132
		353.44	0.00196726
		353.58	0.00195324
		353.72	0.00193927
		353.86	0.00192534
		354	0.00191147
		354.14	0.00189765
		354.28	0.0018839
		354.42	0.0018702
		354.56	0.00185656
		354.7	0.00184299
		354.84	0.00182949
		354.98	0.00181605
		355.12	0.00180269
		355.26	0.0017894
		355.4	0.00177618
		355.54	0.00176304
		355.68	0.00174997
		355.82	0.00173698
		355.96	0.00172406
		356.1	0.00171123
		356.24	0.00169847
		356.38	0.00168579
		356.52	0.00167319
		356.66	0.00166066
		356.8	0.00164821
		356.94	0.00163583
		357.08	0.00162353
		357.22	0.00161131
		357.36	0.00159916
		357.5	0.00158708
		357.64	0.00157506
		357.78	0.00156312
		357.92	0.00155125
		358.06	0.00153944
		358.2	0.0015277
		358.34	0.00151601
		358.48	0.00150439
		358.62	0.00149282
		358.76	0.00148131
		358.9	0.00146986
		359.04	0.00145845
		359.18	0.0014471
		359.32	0.00143579
		359.46	0.00142453
		359.6	0.00141331
		359.74	0.00140214
		359.88	0.00139101
		360.02	0.00137991
		360.16	0.00136886
		360.3	0.00135783
		360.44	0.00134685
		360.58	0.00133589
		360.72	0.00132497
		360.86	0.00131408
		361	0.00130322
		361.14	0.00129238
		361.28	0.00128158
		361.42	0.0012708
		361.56	0.00126004
		361.7	0.00124932
		361.84	0.00123862
		361.98	0.00122794
		362.12	0.00121729
		362.26	0.00120667
		362.4	0.00119607
		362.54	0.0011855
		362.68	0.00117495
		362.82	0.00116443
		362.96	0.00115394
		363.1	0.00114348
		363.24	0.00113305
		363.38	0.00112265
		363.52	0.00111229
		363.66	0.00110195
		363.8	0.00109165
		363.94	0.00108139
		364.08	0.00107116
		364.22	0.00106097
		364.36	0.00105083
		364.5	0.00104072
		364.64	0.00103065
		364.78	0.00102064
		364.92	0.00101066
		365.06	0.00100074
		365.2	0.000990863
		365.34	0.00098104
		365.48	0.00097127
		365.62	0.000961551
		365.76	0.000951891
		365.9	0.000942289
		366.04	0.000932746
		366.18	0.000923263
		366.32	0.000913842
		366.46	0.000904481
		366.6	0.000895188
		366.74	0.000885959
		366.88	0.000876799
		367.02	0.000867708
		367.16	0.000858686
		367.3	0.000849734
		367.44	0.000840854
		367.58	0.000832045
		367.72	0.00082331
		367.86	0.000814645
		368	0.000806058
		368.14	0.000797545
		368.28	0.000789108
		368.42	0.000780747
		368.56	0.000772462
		368.7	0.000764253
		368.84	0.000756121
		368.98	0.000748066
		369.12	0.000740087
		369.26	0.00073218
		369.4	0.000724357
		369.54	0.00071661
		369.68	0.00070894
		369.82	0.000701347
		369.96	0.00069383
		370.1	0.00068639
		370.24	0.000679026
		370.38	0.000671738
		370.52	0.000664526
		370.66	0.000657391
		370.8	0.00065033
		370.94	0.000643342
		371.08	0.00063643
		371.22	0.000629591
		371.36	0.000622824
		371.5	0.000616133
		371.64	0.000609515
		371.78	0.000602971
		371.92	0.000596499
		372.06	0.000590099
		372.2	0.000583772
		372.34	0.000577517
		372.48	0.000571334
		372.62	0.000565223
		372.76	0.000559184
		372.9	0.000553216
		373.04	0.00054732
		373.18	0.000541495
		373.32	0.000535742
		373.46	0.000530057
		373.6	0.000524448
		373.74	0.00051891
		373.88	0.000513444
		374.02	0.000508047
		374.16	0.000502725
		374.3	0.000497476
		374.44	0.000492299
		374.58	0.000487195
		374.72	0.000482163
		374.86	0.000477204
		375	0.000472319
		375.14	0.000467507
		375.28	0.000462768
		375.42	0.000458104
		375.56	0.000453513
		375.7	0.000448996
		375.84	0.000444553
		375.98	0.000440185
		376.12	0.00043589
		376.26	0.00043167
		376.4	0.000427524
		376.54	0.000423452
		376.68	0.000419454
		376.82	0.000415529
		376.96	0.000411678
		377.1	0.0004079
		377.24	0.000404194
		377.38	0.000400561
		377.52	0.000396999
		377.66	0.000393509
		377.8	0.000390088
		377.94	0.000386737
		378.08	0.000383454
		378.22	0.000380239
		378.36	0.000377091
		378.5	0.000374008
		378.64	0.000370989
		378.78	0.000368032
		378.92	0.000365138
		379.06	0.0003623
		379.2	0.000359523
		379.34	0.000356803
		379.48	0.000354137
		379.62	0.000351525
		379.76	0.000348964
		379.9	0.000346451
		380.04	0.000343986
		380.18	0.000341565
		380.32	0.000339184
		380.46	0.000336846
		380.6	0.000334544
		380.74	0.000332279
		380.88	0.000330048
		381.02	0.000327848
		381.16	0.000325675
		381.3	0.000323528
		381.44	0.000321404
		381.58	0.0003193
		381.72	0.000317214
		381.86	0.000315143
		382	0.000313084
		382.14	0.000311035
		382.28	0.000308994
		382.42	0.000306957
		382.56	0.00030492
		382.7	0.000302885
		382.84	0.000300847
		382.98	0.000298804
		383.12	0.000296753
		383.26	0.000294692
		383.4	0.000292619
		383.54	0.000290529
		383.68	0.000288425
		383.82	0.000286302
		383.96	0.000284159
		384.1	0.000281994
		384.24	0.000279804
		384.38	0.000277589
		384.52	0.000275347
		384.66	0.000273075
		384.8	0.000270774
		384.94	0.000268442
		385.08	0.000266077
		385.22	0.000263679
		385.36	0.000261247
		385.5	0.00025878
		385.64	0.000256278
		385.78	0.00025374
		385.92	0.000251166
		386.06	0.000248555
		386.2	0.000245909
		386.34	0.000243229
		386.48	0.00024051
		386.62	0.000237755
		386.76	0.000234965
		386.9	0.00023214
		387.04	0.000229281
		387.18	0.000226389
		387.32	0.000223461
		387.46	0.000220505
		387.6	0.000217519
		387.74	0.000214503
		387.88	0.00021146
		388.02	0.000208388
		388.16	0.000205294
		388.3	0.000202177
		388.44	0.000199038
		388.58	0.000195879
		388.72	0.000192702
		388.86	0.000189509
		389	0.000186301
		389.14	0.000183082
		389.28	0.000179852
		389.42	0.000176611
		389.56	0.000173367
		389.7	0.000170119
		389.84	0.000166869
		389.98	0.000163619
		390.12	0.000160372
		390.26	0.000157129
		390.4	0.000153894
		390.54	0.000150664
		390.68	0.000147448
		390.82	0.000144246
		390.96	0.000141056
		391.1	0.000137887
		391.24	0.000134738
		391.38	0.000131607
		391.52	0.000128503
		391.66	0.000125421
		391.8	0.00012237
		391.94	0.000119348
		392.08	0.000116357
		392.22	0.000113402
		392.36	0.000110476
		392.5	0.000107589
		392.64	0.00010474
		392.78	0.00010193
		392.92	9.91605e-05
		393.06	9.64331e-05
		393.2	9.37488e-05
		393.34	9.11091e-05
		393.48	8.85149e-05
		393.62	8.59674e-05
		393.76	8.34675e-05
		393.9	8.10162e-05
		394.04	7.86143e-05
		394.18	7.62626e-05
		394.32	7.39617e-05
		394.46	7.17122e-05
		394.6	6.95148e-05
		394.74	6.73698e-05
		394.88	6.52776e-05
		395.02	6.32387e-05
		395.16	6.12504e-05
		395.3	5.93187e-05
		395.44	5.74408e-05
		395.58	5.56167e-05
		395.72	5.38465e-05
		395.86	5.213e-05
		396	5.04672e-05
		396.14	4.88578e-05
		396.28	4.73018e-05
		396.42	4.57987e-05
		396.56	4.43483e-05
		396.7	4.29503e-05
		396.84	4.16042e-05
		396.98	4.03095e-05
		397.12	3.90659e-05
		397.26	3.78728e-05
		397.4	3.67296e-05
		397.54	3.56358e-05
		397.68	3.45908e-05
		397.82	3.35939e-05
		397.96	3.26445e-05
		398.1	3.17391e-05
		398.24	3.08829e-05
		398.38	3.00721e-05
		398.52	2.93061e-05
		398.66	2.85841e-05
		398.8	2.79054e-05
		398.94	2.72693e-05
		399.08	2.66749e-05
		399.22	2.61217e-05
		399.36	2.56089e-05
		399.5	2.51356e-05
		399.64	2.47013e-05
		399.78	2.43052e-05
		399.92	2.39465e-05
		400.06	2.36246e-05
		400.2	2.33388e-05
		400.34	2.30884e-05
		400.48	2.28728e-05
		400.62	2.26912e-05
		400.76	2.25431e-05
		400.9	2.24279e-05
		401.04	2.23449e-05
		401.18	2.22935e-05
		401.32	2.22733e-05
		401.46	2.22837e-05
		401.6	2.23213e-05
		401.74	2.23916e-05
		401.88	2.2491e-05
		402.02	2.26191e-05
		402.16	2.27754e-05
		402.3	2.29595e-05
		402.44	2.31711e-05
		402.58	2.34099e-05
		402.72	2.36754e-05
		402.86	2.39675e-05
		403	2.42858e-05
		403.14	2.46301e-05
		403.28	2.50003e-05
		403.42	2.5396e-05
		403.56	2.58172e-05
		403.7	2.62637e-05
		403.84	2.67355e-05
		403.98	2.72323e-05
		404.12	2.77542e-05
		404.26	2.83011e-05
		404.4	2.8873e-05
		404.54	2.94699e-05
		404.68	3.00918e-05
		404.82	3.07389e-05
		404.96	3.14112e-05
		405.1	3.21087e-05
		405.24	3.28317e-05
		405.38	3.35802e-05
		405.52	3.43545e-05
		405.66	3.51547e-05
		405.8	3.5981e-05
		405.94	3.68337e-05
		406.08	3.7713e-05
		406.22	3.86192e-05
		406.36	3.95525e-05
		406.5	4.05133e-05
		406.64	4.15019e-05
		406.78	4.25186e-05
		406.92	4.35637e-05
		407.06	4.46376e-05
		407.2	4.57407e-05
		407.34	4.68734e-05
		407.48	4.8036e-05
		407.62	4.9229e-05
		407.76	5.04527e-05
		407.9	5.17077e-05
		408.04	5.29943e-05
		408.18	5.4313e-05
		408.32	5.56642e-05
		408.46	5.70483e-05
		408.6	5.84659e-05
		408.74	5.99173e-05
		408.88	6.14031e-05
		409.02	6.29236e-05
		409.16	6.44794e-05
		409.3	6.60709e-05
		409.44	6.76957e-05
		409.58	6.93601e-05
		409.72	7.10616e-05
		409.86	7.28005e-05
		410	7.45773e-05
		410.14	7.63923e-05
		410.28	7.82461e-05
		410.42	8.0139e-05
		410.56	8.20714e-05
		410.7	8.40436e-05
		410.84	8.60561e-05
		410.98	8.81091e-05
		411.12	9.02029e-05
		411.26	9.23379e-05
		411.4	9.45144e-05
		411.54	9.67325e-05
		411.68	9.89925e-05
		411.82	0.000101295
		411.96	0.000103639
		412.1	0.000106026
		412.24	0.000108455
		412.38	0.000110927
		412.52	0.000113442
		412.66	0.000115999
		412.8	0.000118599
		412.94	0.000121242
		413.08	0.000123927
		413.22	0.000126654
		413.36	0.000129424
		413.5	0.000132235
		413.64	0.000135088
		413.78	0.000137983
		413.92	0.000140919
		414.06	0.000143895
		414.2	0.000146911
		414.34	0.000149967
		414.48	0.000153059
		414.62	0.000156193
		414.76	0.000159364
		414.9	0.000162573
		415.04	0.000165818
		415.18	0.000169098
		415.32	0.000172413
		415.46	0.000175762
		415.6	0.000179143
		415.74	0.000182556
		415.88	0.000185999
		416.02	0.000189472
		416.16	0.000192972
		416.3	0.0001965
		416.44	0.00020005
		416.58	0.000203627
		416.72	0.000207227
		416.86	0.000210848
		417	0.000214488
		417.14	0.000218146
		417.28	0.000221821
		417.42	0.00022551
		417.56	0.000229212
		417.7	0.000232924
		417.84	0.000236646
		417.98	0.000240375
		418.12	0.000244109
		418.26	0.000247845
		418.4	0.00025158
		418.54	0.000255317
		418.68	0.00025905
		418.82	0.000262778
		418.96	0.000266498
		419.1	0.000270208
		419.24	0.000273906
		419.38	0.000277589
		419.52	0.000281255
		419.66	0.000284901
		419.8	0.000288526
		419.94	0.000292126
		420.08	0.0002957
		420.22	0.000299245
		420.36	0.000302758
		420.5	0.000306236
		420.64	0.000309678
		420.78	0.000313081
		420.92	0.000316443
		421.06	0.00031976
		421.2	0.000323031
		421.34	0.000326253
		421.48	0.000329423
		421.62	0.000332539
		421.76	0.0003356
		421.9	0.000338601
		422.04	0.000341541
		422.18	0.000344418
		422.32	0.00034723
		422.46	0.000349973
		422.6	0.000352646
		422.74	0.000355247
		422.88	0.000357774
		423.02	0.000360224
		423.16	0.000362596
		423.3	0.000364887
		423.44	0.000367096
		423.58	0.00036922
		423.72	0.000371259
		423.86	0.000373209
		424	0.000375071
		424.14	0.000376842
		424.28	0.00037852
		424.42	0.000380105
		424.56	0.000381594
		424.7	0.000382987
		424.84	0.000384283
		424.98	0.00038548
		425.12	0.000386578
		425.26	0.000387575
		425.4	0.000388471
		425.54	0.000389264
		425.68	0.000389956
		425.82	0.000390544
		425.96	0.000391028
		426.1	0.000391409
		426.24	0.000391685
		426.38	0.000391857
		426.52	0.000391925
		426.66	0.000391888
		426.8	0.000391747
		426.94	0.000391502
		427.08	0.000391154
		427.22	0.000390702
		427.36	0.000390147
		427.5	0.00038949
		427.64	0.000388732
		427.78	0.000387873
		427.92	0.000386914
		428.06	0.000385856
		428.2	0.0003847
		428.34	0.000383448
		428.48	0.000382099
		428.62	0.000380657
		428.76	0.000379122
		428.9	0.000377495
		429.04	0.000375778
		429.18	0.000373972
		429.32	0.00037208
		429.46	0.000370103
		429.6	0.000368042
		429.74	0.0003659
		429.88	0.000363678
		430.02	0.000361378
		430.16	0.000359002
		430.3	0.000356553
		430.44	0.000354032
		430.58	0.000351441
		430.72	0.000348783
		430.86	0.000346059
		431	0.000343272
		431.14	0.000340425
		431.28	0.000337519
		431.42	0.000334556
		431.56	0.00033154
		431.7	0.000328472
		431.84	0.000325354
		431.98	0.00032219
		432.12	0.00031898
		432.26	0.000315729
		432.4	0.000312437
		432.54	0.000309108
		432.68	0.000305743
		432.82	0.000302346
		432.96	0.000298917
		433.1	0.000295461
		433.24	0.000291978
		433.38	0.000288471
		433.52	0.000284943
		433.66	0.000281396
		433.8	0.000277831
		433.94	0.000274252
		434.08	0.00027066
		434.22	0.000267057
		434.36	0.000263445
		434.5	0.000259827
		434.64	0.000256204
		434.78	0.000252579
		434.92	0.000248953
		435.06	0.000245328
		435.2	0.000241707
		435.34	0.00023809
		435.48	0.00023448
		435.62	0.000230878
		435.76	0.000227287
		435.9	0.000223706
		436.04	0.00022014
		436.18	0.000216588
		436.32	0.000213052
		436.46	0.000209533
		436.6	0.000206034
		436.74	0.000202555
		436.88	0.000199098
		437.02	0.000195663
		437.16	0.000192253
		437.3	0.000188867
		437.44	0.000185508
		437.58	0.000182176
		437.72	0.000178873
		437.86	0.000175598
		438	0.000172353
		438.14	0.00016914
		438.28	0.000165958
		438.42	0.000162808
		438.56	0.000159691
		438.7	0.000156608
		438.84	0.000153559
		438.98	0.000150545
		439.12	0.000147567
		439.26	0.000144624
		439.4	0.000141718
		439.54	0.000138848
		439.68	0.000136015
		439.82	0.000133219
		439.96	0.000130461
		440.1	0.000127741
		440.24	0.000125059
		440.38	0.000122415
		440.52	0.00011981
		440.66	0.000117242
		440.8	0.000114714
		440.94	0.000112223
		441.08	0.000109772
		441.22	0.000107359
		441.36	0.000104984
		441.5	0.000102648
		441.64	0.00010035
		441.78	9.80897e-05
		441.92	9.58679e-05
		442.06	9.3684e-05
		442.2	9.15378e-05
		442.34	8.94291e-05
		442.48	8.73577e-05
		442.62	8.53233e-05
		442.76	8.33257e-05
		442.9	8.13645e-05
		443.04	7.94396e-05
		443.18	7.75505e-05
		443.32	7.56971e-05
		443.46	7.38789e-05
		443.6	7.20956e-05
		443.74	7.03469e-05
		443.88	6.86324e-05
		444.02	6.69517e-05
		444.16	6.53045e-05
		444.3	6.36904e-05
		444.44	6.21089e-05
		444.58	6.05597e-05
		444.72	5.90423e-05
		444.86	5.75564e-05
		445	5.61016e-05
		445.14	5.46773e-05
		445.28	5.32833e-05
		445.42	5.1919e-05
		445.56	5.0584e-05
		445.7	4.9278e-05
		445.84	4.80004e-05
		445.98	4.67508e-05
		446.12	4.55289e-05
		446.26	4.43341e-05
		446.4	4.3166e-05
		446.54	4.20242e-05
		446.68	4.09083e-05
		446.82	3.98177e-05
		446.96	3.87522e-05
		447.1	3.77113e-05
		447.24	3.66944e-05
		447.38	3.57013e-05
		447.52	3.47315e-05
		447.66	3.37845e-05
		447.8	3.286e-05
		447.94	3.19575e-05
		448.08	3.10766e-05
		448.22	3.02169e-05
		448.36	2.9378e-05
		448.5	2.85595e-05
		448.64	2.77611e-05
		448.78	2.69822e-05
		448.92	2.62226e-05
		449.06	2.54819e-05
		449.2	2.47596e-05
		449.34	2.40553e-05
		449.48	2.33688e-05
		449.62	2.26997e-05
		449.76	2.20475e-05
		449.9	2.1412e-05
		450.04	2.07928e-05
		450.18	2.01895e-05
		450.32	1.96018e-05
		450.46	1.90294e-05
		450.6	1.84719e-05
		450.74	1.7929e-05
		450.88	1.74003e-05
		451.02	1.68857e-05
		451.16	1.63847e-05
		451.3	1.5897e-05
		451.44	1.54224e-05
		451.58	1.49605e-05
		451.72	1.45111e-05
		451.86	1.40738e-05
		452	1.36484e-05
		452.14	1.32346e-05
		452.28	1.28322e-05
		452.42	1.24408e-05
		452.56	1.20602e-05
		452.7	1.16902e-05
		452.84	1.13305e-05
		452.98	1.09808e-05
		453.12	1.06409e-05
		453.26	1.03105e-05
		453.4	9.98952e-06
		453.54	9.6776e-06
		453.68	9.37455e-06
		453.82	9.08016e-06
		453.96	8.79419e-06
		454.1	8.51644e-06
		454.24	8.24671e-06
		454.38	7.98478e-06
		454.52	7.73047e-06
		454.66	7.48356e-06
		454.8	7.24388e-06
		454.94	7.01123e-06
		455.08	6.78543e-06
		455.22	6.5663e-06
		455.36	6.35367e-06
		455.5	6.14737e-06
		455.64	5.94722e-06
		455.78	5.75306e-06
		455.92	5.56473e-06
		456.06	5.38209e-06
		456.2	5.20496e-06
		456.34	5.0332e-06
		456.48	4.86667e-06
		456.62	4.70523e-06
		456.76	4.54872e-06
		456.9	4.39702e-06
		457.04	4.25e-06
		457.18	4.10752e-06
		457.32	3.96946e-06
		457.46	3.83569e-06
		457.6	3.70609e-06
		457.74	3.58054e-06
		457.88	3.45894e-06
		458.02	3.34116e-06
		458.16	3.2271e-06
		458.3	3.11665e-06
		458.44	3.0097e-06
		458.58	2.90616e-06
		458.72	2.80593e-06
		458.86	2.70891e-06
		459	2.615e-06
		459.14	2.52412e-06
		459.28	2.43617e-06
		459.42	2.35107e-06
		459.56	2.26874e-06
		459.7	2.1863e-06
		459.84	2.10949e-06
		459.98	2.03519e-06
		460.12	1.96332e-06
		460.26	1.8938e-06
		460.4	1.82657e-06
		460.54	1.76156e-06
		460.68	1.6987e-06
		460.82	1.63793e-06
		460.96	1.57918e-06
		461.1	1.52239e-06
		461.24	1.4675e-06
		461.38	1.41445e-06
		461.52	1.36319e-06
		461.66	1.31366e-06
		461.8	1.26581e-06
		461.94	1.21959e-06
		462.08	1.17493e-06
		462.22	1.13181e-06
		462.36	1.09015e-06
		462.5	1.04993e-06
		462.64	1.0111e-06
		462.78	9.73603e-07
		462.92	9.37406e-07
		463.06	9.02466e-07
		463.2	8.68742e-07
		463.34	8.36196e-07
		463.48	8.04789e-07
		463.62	7.74485e-07
		463.76	7.45247e-07
		463.9	7.17041e-07
		464.04	6.89833e-07
		464.18	6.63591e-07
		464.32	6.38282e-07
		464.46	6.13876e-07
		464.6	5.90344e-07
		464.74	5.67655e-07
		464.88	5.45783e-07
		465.02	5.24699e-07
		465.16	5.04378e-07
		465.3	4.84794e-07
		465.44	4.65922e-07
		465.58	4.47738e-07
		465.72	4.30218e-07
		465.86	4.13341e-07
		466	3.97084e-07
		466.14	3.81426e-07
		466.28	3.66347e-07
		466.42	3.51826e-07
		466.56	3.37845e-07
		466.7	3.24385e-07
		466.84	3.11428e-07
		466.98	2.98956e-07
		467.12	2.86952e-07
		467.26	2.75401e-07
		467.4	2.64285e-07
		467.54	2.53591e-07
		467.68	2.43303e-07
		467.82	2.33406e-07
		467.96	2.23887e-07
		468.1	2.14733e-07
		468.24	2.0593e-07
		468.38	1.97466e-07
		468.52	1.89329e-07
		468.66	1.81506e-07
		468.8	1.73987e-07
		468.94	1.66761e-07
		469.08	1.59817e-07
		469.22	1.53145e-07
		469.36	1.46734e-07
		469.5	1.40576e-07
		469.64	1.3466e-07
		469.78	1.28979e-07
		469.92	1.23523e-07
		470.06	1.18285e-07
		470.2	1.10292e-07
		470.34	1.05668e-07
		470.48	1.01224e-07
		470.62	9.69537e-08
		470.76	9.28513e-08
		470.9	8.89105e-08
		471.04	8.51255e-08
		471.18	8.14907e-08
		471.32	7.80006e-08
		471.46	7.46499e-08
		471.6	7.14336e-08
		471.74	6.83466e-08
		471.88	6.53842e-08
		472.02	6.25418e-08
		472.16	5.9815e-08
		472.3	5.71993e-08
		472.44	5.46907e-08
		472.58	5.2285e-08
		472.72	4.99784e-08
		472.86	4.77672e-08
		473	4.56476e-08
		473.14	4.36163e-08
		473.28	4.16697e-08
		473.42	3.98047e-08
		473.56	3.8018e-08
		473.7	3.63066e-08
		473.84	3.46676e-08
		473.98	3.30981e-08
		474.12	3.15954e-08
		474.26	3.01569e-08
		474.4	2.87801e-08
		474.54	2.74623e-08
		474.68	2.62014e-08
		474.82	2.49951e-08
		474.96	2.3841e-08
		475.1	2.27372e-08
		475.24	2.16816e-08
		475.38	2.06722e-08
		475.52	1.97071e-08
		475.66	1.87846e-08
		475.8	1.79028e-08
		475.94	1.70602e-08
		476.08	1.6255e-08
		476.22	1.54857e-08
		476.36	1.47509e-08
		476.5	1.4049e-08
		476.64	1.33788e-08
		476.78	1.27387e-08
		476.92	1.21277e-08
		477.06	1.15445e-08
		477.2	1.09878e-08
		477.34	1.04565e-08
		477.48	9.9496e-09
		477.62	9.466e-09
		477.76	9.00468e-09
		477.9	8.5647e-09
		478.04	8.14512e-09
		478.18	7.74505e-09
		478.32	7.36364e-09
		478.46	7.00007e-09
		478.6	6.65356e-09
		478.74	6.32335e-09
		478.88	6.00872e-09
		479.02	5.70897e-09
		479.16	5.42345e-09
		479.3	5.15152e-09
		479.44	4.89256e-09
		479.58	4.646e-09
		479.72	4.41126e-09
		479.86	4.18783e-09
[truncated: 1 more rows]

## Sheet: PlotDat15
Source sheet	Late Permian rocks	200	0	236.4	0	200	0
Plot name	ProbDens11	200.14	0	239.2	0	479.86	0
Plot Type	16	200.28	0	239.2	2
1st free col	9	200.42	0	236.4	2
Sigma Level	1	200.56	0	236.4	0
Absolute Errs	TRUE	200.7	0	ErrBox	ErrBox
Symbol Type	1	200.84	0	239.2	0
Inverse Plot	FALSE	200.98	0	242	0
Color Plot	TRUE	201.12	0	242	6
3D plot	FALSE	201.26	0	239.2	6
Linear	FALSE	201.4	0	239.2	0
Data Range	AA1:AB406	201.54	0	ErrBox	ErrBox
Filled Symbols	FALSE	201.68	0	242	0
ConcAge	FALSE	201.82	0	244.8	0
ConcSwap	FALSE	201.96	0	244.8	8
1st Symbol-row	1	202.1	0	242	8
		202.24	0	242	0
		202.38	0	ErrBox	ErrBox
		202.52	0	244.8	0
		202.66	0	247.6	0
		202.8	0	247.6	5
		202.94	0	244.8	5
		203.08	0	244.8	0
		203.22	0	ErrBox	ErrBox
		203.36	0	247.6	0
		203.5	0	250.4	0
		203.64	0	250.4	10
		203.78	0	247.6	10
		203.92	3.10552e-09	247.6	0
		204.06	3.38372e-09	ErrBox	ErrBox
		204.2	3.68558e-09	250.4	0
		204.34	4.013e-09	253.2	0
		204.48	4.36802e-09	253.2	13
		204.62	4.75283e-09	250.4	13
		204.76	5.16977e-09	250.4	0
		204.9	5.62137e-09	ErrBox	ErrBox
		205.04	6.11033e-09	253.2	0
		205.18	6.63956e-09	256	0
		205.32	7.21216e-09	256	14
		205.46	7.83148e-09	253.2	14
		205.6	8.50108e-09	253.2	0
		205.74	9.22478e-09	ErrBox	ErrBox
		205.88	1.00067e-08	256	0
		206.02	1.08511e-08	258.8	0
		206.16	1.17629e-08	258.8	19
		206.3	1.27468e-08	256	19
		206.44	1.38084e-08	256	0
		206.58	1.49533e-08	ErrBox	ErrBox
		206.72	1.61876e-08	258.8	0
		206.86	1.75177e-08	261.6	0
		207	1.89508e-08	261.6	26
		207.14	2.0494e-08	258.8	26
		207.28	2.21554e-08	258.8	0
		207.42	2.39433e-08	ErrBox	ErrBox
		207.56	2.58666e-08	261.6	0
		207.7	2.79349e-08	264.4	0
		207.84	3.01583e-08	264.4	21
		207.98	3.25476e-08	261.6	21
		208.12	3.51141e-08	261.6	0
		208.26	4.08995e-08	ErrBox	ErrBox
		208.4	4.71564e-08	264.4	0
		208.54	5.09636e-08	267.2	0
		208.68	5.50617e-08	267.2	28
		208.82	5.94716e-08	264.4	28
		208.96	6.42154e-08	264.4	0
		209.1	6.9317e-08	ErrBox	ErrBox
		209.24	7.48015e-08	267.2	0
		209.38	8.0696e-08	270	0
		209.52	8.70289e-08	270	14
		209.66	9.3831e-08	267.2	14
		209.8	1.01135e-07	267.2	0
		209.94	1.08974e-07	ErrBox	ErrBox
		210.08	1.17387e-07	270	0
		210.22	1.26411e-07	272.8	0
		210.36	1.36089e-07	272.8	17
		210.5	1.46464e-07	270	17
		210.64	1.57583e-07	270	0
		210.78	1.69497e-07	ErrBox	ErrBox
		210.92	1.82257e-07	272.8	0
		211.06	1.95919e-07	275.6	0
		211.2	2.10543e-07	275.6	13
		211.34	2.26192e-07	272.8	13
		211.48	2.42931e-07	272.8	0
		211.62	2.60833e-07	ErrBox	ErrBox
		211.76	2.7997e-07	275.6	0
		211.9	3.00423e-07	278.4	0
		212.04	3.22274e-07	278.4	5
		212.18	3.45611e-07	275.6	5
		212.32	3.7053e-07	275.6	0
		212.46	3.97126e-07	ErrBox	ErrBox
		212.6	4.25506e-07	278.4	0
		212.74	4.55778e-07	281.2	0
		212.88	4.88059e-07	281.2	4
		213.02	5.22471e-07	278.4	4
		213.16	5.59144e-07	278.4	0
		213.3	5.98212e-07	ErrBox	ErrBox
		213.44	6.39819e-07	281.2	0
		213.58	6.84117e-07	284	0
		213.72	7.31263e-07	284	4
		213.86	7.81425e-07	281.2	4
		214	8.34778e-07	281.2	0
		214.14	8.91508e-07	ErrBox	ErrBox
		214.28	9.51808e-07	284	0
		214.42	1.01588e-06	286.8	0
		214.56	1.08394e-06	286.8	6
		214.7	1.15622e-06	284	6
		214.84	1.23294e-06	284	0
		214.98	1.31751e-06	ErrBox	ErrBox
		215.12	1.4041e-06	286.8	0
		215.26	1.49593e-06	289.6	0
		215.4	1.59329e-06	289.6	3
		215.54	1.69964e-06	286.8	3
		215.68	1.81269e-06	286.8	0
		215.82	1.9294e-06	ErrBox	ErrBox
		215.96	2.05303e-06	289.6	0
		216.1	2.19037e-06	292.4	0
		216.24	2.33289e-06	292.4	3
		216.38	2.4809e-06	289.6	3
		216.52	2.63759e-06	289.6	0
		216.66	2.80341e-06	ErrBox	ErrBox
		216.8	2.97886e-06	292.4	0
		216.94	3.16443e-06	295.2	0
		217.08	3.36066e-06	295.2	4
		217.22	3.57141e-06	292.4	4
		217.36	3.79103e-06	292.4	0
		217.5	4.02309e-06	ErrBox	ErrBox
		217.64	4.27137e-06	295.2	0
		217.78	4.53045e-06	298	0
		217.92	4.80402e-06	298	9
		218.06	5.0928e-06	295.2	9
		218.2	5.39758e-06	295.2	0
		218.34	5.71914e-06	ErrBox	ErrBox
		218.48	6.05835e-06	298	0
		218.62	6.41609e-06	300.8	0
		218.76	6.79327e-06	300.8	9
		218.9	7.19385e-06	298	9
		219.04	7.61328e-06	298	0
		219.18	8.05525e-06	ErrBox	ErrBox
		219.32	8.52085e-06	300.8	0
		219.46	9.01126e-06	303.6	0
		219.6	9.5339e-06	303.6	4
		219.74	1.00782e-05	300.8	4
		219.88	1.06512e-05	300.8	0
		220.02	1.12543e-05	ErrBox	ErrBox
		220.16	1.18889e-05	303.6	0
		220.3	1.25566e-05	306.4	0
		220.44	1.32589e-05	306.4	4
		220.58	1.39975e-05	303.6	4
		220.72	1.47741e-05	303.6	0
		220.86	1.55906e-05	ErrBox	ErrBox
		221	1.64489e-05	306.4	0
		221.14	1.73509e-05	309.2	0
		221.28	1.82988e-05	309.2	8
		221.42	1.92946e-05	306.4	8
		221.56	2.03406e-05	306.4	0
		221.7	2.14426e-05	ErrBox	ErrBox
		221.84	2.25968e-05	309.2	0
		221.98	2.38088e-05	312	0
		222.12	2.50941e-05	312	11
		222.26	2.64319e-05	309.2	11
		222.4	2.78394e-05	309.2	0
		222.54	2.93138e-05	ErrBox	ErrBox
		222.68	3.08642e-05	312	0
		222.82	3.24884e-05	314.8	0
		222.96	3.41926e-05	314.8	8
		223.1	3.59805e-05	312	8
		223.24	3.78561e-05	312	0
		223.38	3.98235e-05	ErrBox	ErrBox
		223.52	4.18869e-05	314.8	0
		223.66	4.40509e-05	317.6	0
		223.8	4.632e-05	317.6	3
		223.94	4.86993e-05	314.8	3
		224.08	5.11969e-05	314.8	0
		224.22	5.38122e-05	ErrBox	ErrBox
		224.36	5.65537e-05	317.6	0
		224.5	5.94271e-05	320.4	0
		224.64	6.24419e-05	320.4	4
		224.78	6.56048e-05	317.6	4
		224.92	6.89164e-05	317.6	0
		225.06	7.23837e-05	ErrBox	ErrBox
		225.2	7.60166e-05	320.4	0
		225.34	7.98259e-05	323.2	0
		225.48	8.38138e-05	323.2	3
		225.62	8.79913e-05	320.4	3
		225.76	9.23672e-05	320.4	0
		225.9	9.6957e-05	ErrBox	ErrBox
		226.04	0.000101758	323.2	0
		226.18	0.000106787	326	0
		226.32	0.000112056	326	6
		226.46	0.000117573	323.2	6
		226.6	0.000123348	323.2	0
		226.74	0.000129397	ErrBox	ErrBox
		226.88	0.000135731	326	0
		227.02	0.000142362	328.8	0
		227.16	0.000149307	328.8	3
		227.3	0.000156574	326	3
		227.44	0.000164181	326	0
		227.58	0.000172147	ErrBox	ErrBox
		227.72	0.000180477	328.8	0
		227.86	0.000189195	331.6	0
		228	0.000198317	331.6	2
		228.14	0.000207863	328.8	2
		228.28	0.000217849	328.8	0
		228.42	0.000228299	ErrBox	ErrBox
		228.56	0.00023923	331.6	0
		228.7	0.000250667	334.4	0
		228.84	0.000262628	334.4	5
		228.98	0.000275132	331.6	5
		229.12	0.000288205	331.6	0
		229.26	0.000301871	ErrBox	ErrBox
		229.4	0.000316158	334.4	0
		229.54	0.000331082	337.2	0
		229.68	0.000346673	337.2	5
		229.82	0.000362959	334.4	5
		229.96	0.00037997	334.4	0
		230.1	0.000397727	ErrBox	ErrBox
		230.24	0.000416265	337.2	0
		230.38	0.000435608	340	0
		230.52	0.000455784	340	2
		230.66	0.000476823	337.2	2
		230.8	0.000498759	337.2	0
		230.94	0.000521615	ErrBox	ErrBox
		231.08	0.000545424	340	0
		231.22	0.000570214	342.8	0
		231.36	0.00059602	342.8	3
		231.5	0.000622874	340	3
		231.64	0.000650792	340	0
		231.78	0.000679806	ErrBox	ErrBox
		231.92	0.000709946	345.6	0
		232.06	0.000741239	348.4	0
		232.2	0.000773711	348.4	4
		232.34	0.00080739	345.6	4
		232.48	0.000842299	345.6	0
		232.62	0.000878469	ErrBox	ErrBox
		232.76	0.000915901	348.4	0
		232.9	0.000954631	351.2	0
		233.04	0.000994669	351.2	4
		233.18	0.00103603	348.4	4
		233.32	0.00107874	348.4	0
		233.46	0.0011228	ErrBox	ErrBox
		233.6	0.00116823	351.2	0
		233.74	0.00121503	354	0
		233.88	0.00126321	354	2
		234.02	0.00131277	351.2	2
		234.16	0.00136372	351.2	0
		234.3	0.00141606	ErrBox	ErrBox
		234.44	0.00146978	354	0
		234.58	0.00152488	356.8	0
		234.72	0.00158135	356.8	2
		234.86	0.00163918	354	2
		235	0.00169836	354	0
		235.14	0.00175887	ErrBox	ErrBox
		235.28	0.00182069	356.8	0
		235.42	0.00188383	359.6	0
		235.56	0.00194824	359.6	1
		235.7	0.00201392	356.8	1
		235.84	0.00208084	356.8	0
		235.98	0.00214897	ErrBox	ErrBox
		236.12	0.00221829	359.6	0
		236.26	0.00228878	362.4	0
		236.4	0.00236039	362.4	2
		236.54	0.00243313	359.6	2
		236.68	0.00250694	359.6	0
		236.82	0.00258181	ErrBox	ErrBox
		236.96	0.0026577	370.8	0
		237.1	0.00273458	373.6	0
		237.24	0.00281244	373.6	2
		237.38	0.00289123	370.8	2
		237.52	0.00297093	370.8	0
		237.66	0.00305152	ErrBox	ErrBox
		237.8	0.00313296	384.8	0
		237.94	0.00321523	387.6	0
		238.08	0.0032983	387.6	1
		238.22	0.00338216	384.8	1
		238.36	0.00346678	384.8	0
		238.5	0.00355214	ErrBox	ErrBox
		238.64	0.0036382	424	0
		238.78	0.00372495	426.8	0
		238.92	0.00381238	426.8	2
		239.06	0.00390045	424	2
		239.2	0.00398916	424	0
		239.34	0.00407848	ErrBox	ErrBox
		239.48	0.0041684	426.8	0
		239.62	0.00425891	429.6	0
		239.76	0.00434998	429.6	1
		239.9	0.00444161	426.8	1
		240.04	0.00453377	426.8	0
		240.18	0.00462645	ErrBox	ErrBox
		240.32	0.00471964
		240.46	0.00481332
		240.6	0.00490748
		240.74	0.00500212
		240.88	0.0050972
		241.02	0.00519273
		241.16	0.00528869
		241.3	0.00538507
		241.44	0.00548185
		241.58	0.00557902
		241.72	0.00567657
		241.86	0.0057745
		242	0.00587279
		242.14	0.00597142
		242.28	0.00607039
		242.42	0.00616968
		242.56	0.0062693
		242.7	0.00636922
		242.84	0.00646945
		242.98	0.00656997
		243.12	0.0066708
		243.26	0.00677191
		243.4	0.0068733
		243.54	0.00697498
		243.68	0.00707694
		243.82	0.00717919
		243.96	0.00728172
		244.1	0.00738456
		244.24	0.0074877
		244.38	0.00759114
		244.52	0.00769489
		244.66	0.00779897
		244.8	0.00790339
		244.94	0.00800817
		245.08	0.00811331
		245.22	0.00821884
		245.36	0.00832476
		245.5	0.00843111
		245.64	0.0085379
		245.78	0.00864515
		245.92	0.00875286
		246.06	0.00886109
		246.2	0.00896982
		246.34	0.0090791
		246.48	0.00918894
		246.62	0.00929937
		246.76	0.00941039
		246.9	0.00952203
		247.04	0.00963431
		247.18	0.00974724
		247.32	0.00986085
		247.46	0.00997513
		247.6	0.0100901
		247.74	0.0102058
		247.88	0.0103222
		248.02	0.0104394
		248.16	0.0105572
		248.3	0.0106758
		248.44	0.0107951
		248.58	0.0109152
		248.72	0.011036
		248.86	0.0111575
		249	0.0112798
		249.14	0.0114027
		249.28	0.0115263
		249.42	0.0116507
		249.56	0.0117757
		249.7	0.0119013
		249.84	0.0120276
		249.98	0.0121545
		250.12	0.012282
		250.26	0.0124101
		250.4	0.0125388
		250.54	0.012668
		250.68	0.0127978
		250.82	0.0129281
		250.96	0.0130588
		251.1	0.0131901
		251.24	0.0133218
		251.38	0.0134539
		251.52	0.0135865
		251.66	0.0137196
		251.8	0.013853
		251.94	0.0139868
		252.08	0.0141211
		252.22	0.0142558
		252.36	0.0143908
		252.5	0.0145263
		252.64	0.0146622
		252.78	0.0147984
		252.92	0.0149351
		253.06	0.0150722
		253.2	0.0152098
		253.34	0.0153478
		253.48	0.0154862
		253.62	0.0156251
		253.76	0.0157644
		253.9	0.0159042
		254.04	0.0160445
		254.18	0.0161853
		254.32	0.0163266
		254.46	0.0164683
		254.6	0.0166106
		254.74	0.0167533
		254.88	0.0168965
		255.02	0.0170402
		255.16	0.0171843
		255.3	0.0173288
		255.44	0.0174738
		255.58	0.0176191
		255.72	0.0177647
		255.86	0.0179106
		256	0.0180567
		256.14	0.018203
		256.28	0.0183494
		256.42	0.0184958
		256.56	0.0186421
		256.7	0.0187884
		256.84	0.0189344
		256.98	0.0190801
		257.12	0.0192254
		257.26	0.0193701
		257.4	0.0195142
		257.54	0.0196575
		257.68	0.0197999
		257.82	0.0199413
		257.96	0.0200816
		258.1	0.0202205
		258.24	0.0203581
		258.38	0.020494
		258.52	0.0206282
		258.66	0.0207606
		258.8	0.0208909
		258.94	0.0210191
		259.08	0.0211449
		259.22	0.0212682
		259.36	0.021389
		259.5	0.0215069
		259.64	0.0216219
		259.78	0.0217339
		259.92	0.0218426
		260.06	0.021948
		260.2	0.0220499
		260.34	0.0221481
		260.48	0.0222426
		260.62	0.0223332
		260.76	0.0224197
		260.9	0.0225021
		261.04	0.0225803
		261.18	0.022654
		261.32	0.0227233
		261.46	0.022788
		261.6	0.022848
		261.74	0.0229032
		261.88	0.0229535
		262.02	0.0229989
		262.16	0.0230393
		262.3	0.0230745
		262.44	0.0231046
		262.58	0.0231295
		262.72	0.0231491
		262.86	0.0231634
		263	0.0231723
		263.14	0.0231758
		263.28	0.0231739
		263.42	0.0231665
		263.56	0.0231537
		263.7	0.0231354
		263.84	0.0231116
		263.98	0.0230824
		264.12	0.0230477
		264.26	0.0230076
		264.4	0.022962
		264.54	0.022911
		264.68	0.0228547
		264.82	0.0227931
		264.96	0.0227263
		265.1	0.0226542
		265.24	0.022577
		265.38	0.0224947
		265.52	0.0224075
		265.66	0.0223153
		265.8	0.0222183
		265.94	0.0221165
		266.08	0.0220102
		266.22	0.0218993
		266.36	0.0217839
		266.5	0.0216643
		266.64	0.0215404
		266.78	0.0214125
		266.92	0.0212806
		267.06	0.0211449
		267.2	0.0210054
		267.34	0.0208624
		267.48	0.020716
		267.62	0.0205662
		267.76	0.0204133
		267.9	0.0202573
		268.04	0.0200985
		268.18	0.0199369
		268.32	0.0197727
		268.46	0.019606
		268.6	0.0194369
		268.74	0.0192656
		268.88	0.0190923
		269.02	0.018917
		269.16	0.0187399
		269.3	0.0185611
		269.44	0.0183808
		269.58	0.018199
		269.72	0.0180159
		269.86	0.0178316
		270	0.0176462
		270.14	0.0174598
		270.28	0.0172726
		270.42	0.0170846
		270.56	0.0168959
		270.7	0.0167067
		270.84	0.0165171
		270.98	0.016327
		271.12	0.0161367
		271.26	0.0159461
		271.4	0.0157555
		271.54	0.0155648
		271.68	0.0153742
		271.82	0.0151837
		271.96	0.0149933
		272.1	0.0148033
		272.24	0.0146135
		272.38	0.0144242
		272.52	0.0142353
		272.66	0.0140469
		272.8	0.0138592
		272.94	0.013672
		273.08	0.0134856
		273.22	0.0132999
		273.36	0.0131151
		273.5	0.0129311
		273.64	0.0127481
		273.78	0.012566
		273.92	0.0123851
		274.06	0.0122052
		274.2	0.0120264
		274.34	0.0118489
		274.48	0.0116727
		274.62	0.0114977
		274.76	0.0113242
		274.9	0.0111521
		275.04	0.0109815
		275.18	0.0108125
		275.32	0.010645
		275.46	0.0104793
		275.6	0.0103152
		275.74	0.010153
		275.88	0.00999252
		276.02	0.00983398
		276.16	0.0096774
		276.3	0.00952281
		276.44	0.00937028
		276.58	0.00921986
		276.72	0.00907161
		276.86	0.00892557
		277	0.00878179
		277.14	0.00864033
		277.28	0.00850122
		277.42	0.00836452
		277.56	0.00823026
		277.7	0.00809849
		277.84	0.00796926
		277.98	0.00784258
		278.12	0.00771849
		278.26	0.00759704
		278.4	0.00747824
		278.54	0.00736211
		278.68	0.00724869
		278.82	0.00713799
		278.96	0.00703002
		279.1	0.00692479
		279.24	0.00682232
		279.38	0.00672261
		279.52	0.00662566
		279.66	0.00653148
		279.8	0.00644004
		279.94	0.00635135
		280.08	0.00626539
		280.22	0.00618215
		280.36	0.00610161
		280.5	0.00602374
		280.64	0.00594853
		280.78	0.00587594
		280.92	0.00580593
		281.06	0.00573849
		281.2	0.00567357
		281.34	0.00561113
		281.48	0.00555113
		281.62	0.00549353
		281.76	0.00543828
		281.9	0.00538532
		282.04	0.00533463
		282.18	0.00528614
		282.32	0.00523981
		282.46	0.00519557
		282.6	0.00515339
		282.74	0.0051132
		282.88	0.00507494
		283.02	0.00503857
		283.16	0.00500402
		283.3	0.00497125
		283.44	0.0049402
		283.58	0.00491081
		283.72	0.00488303
		283.86	0.0048568
		284	0.00483208
		284.14	0.00480883
		284.28	0.00478697
		284.42	0.00476647
		284.56	0.00474729
		284.7	0.00472937
		284.84	0.00471267
		284.98	0.00469715
		285.12	0.00468279
		285.26	0.00466952
		285.4	0.00465732
		285.54	0.00464616
		285.68	0.00463601
		285.82	0.00462683
		285.96	0.0046186
		286.1	0.00461131
		286.24	0.00460492
		286.38	0.00459942
		286.52	0.00459479
		286.66	0.00459101
		286.8	0.00458808
		286.94	0.00458599
		287.08	0.00458472
		287.22	0.00458427
		287.36	0.00458464
		287.5	0.00458582
		287.64	0.00458783
		287.78	0.00459066
		287.92	0.00459431
		288.06	0.0045988
		288.2	0.00460412
		288.34	0.00461031
		288.48	0.00461736
		288.62	0.00462528
		288.76	0.00463409
		288.9	0.00464381
		289.04	0.00465446
		289.18	0.00466604
		289.32	0.00467858
		289.46	0.00469209
		289.6	0.00470659
		289.74	0.00472209
		289.88	0.00473862
		290.02	0.0047562
		290.16	0.00477483
		290.3	0.00479452
		290.44	0.00481531
		290.58	0.00483721
		290.72	0.00486021
		290.86	0.00488433
		291	0.00490957
		291.14	0.00493596
		291.28	0.00496348
		291.42	0.00499213
		291.56	0.00502192
		291.7	0.00505283
		291.84	0.00508486
		291.98	0.00511799
		292.12	0.00515222
		292.26	0.00518751
		292.4	0.00522386
		292.54	0.00526122
		292.68	0.00529957
		292.82	0.00533888
		292.96	0.0053791
		293.1	0.0054202
		293.24	0.00546212
		293.38	0.00550482
		293.52	0.00554824
		293.66	0.00559233
		293.8	0.00563702
		293.94	0.00568226
		294.08	0.00572796
		294.22	0.00577406
		294.36	0.00582049
		294.5	0.00586717
		294.64	0.00591403
		294.78	0.00596099
		294.92	0.00600796
		295.06	0.00605487
		295.2	0.00610163
		295.34	0.00614817
		295.48	0.0061944
		295.62	0.00624025
		295.76	0.00628562
		295.9	0.00633045
		296.04	0.00637465
		296.18	0.00641816
		296.32	0.00646089
		296.46	0.0065028
		296.6	0.0065438
		296.74	0.00658383
		296.88	0.00662284
		297.02	0.00666077
		297.16	0.00669758
		297.3	0.00673322
		297.44	0.00676765
		297.58	0.00680084
		297.72	0.00683276
		297.86	0.00686338
		298	0.00689269
		298.14	0.00692066
		298.28	0.0069473
		298.42	0.00697259
		298.56	0.00699655
		298.7	0.00701917
		298.84	0.00704046
		298.98	0.00706045
		299.12	0.00707915
		299.26	0.00709659
		299.4	0.0071128
		299.54	0.0071278
		299.68	0.00714164
		299.82	0.00715436
		299.96	0.00716598
		300.1	0.00717657
		300.24	0.00718616
		300.38	0.0071948
		300.52	0.00720255
		300.66	0.00720945
		300.8	0.00721555
		300.94	0.0072209
		301.08	0.00722557
		301.22	0.0072296
		301.36	0.00723305
		301.5	0.00723596
		301.64	0.00723839
		301.78	0.00724039
		301.92	0.007242
		302.06	0.00724329
		302.2	0.00724428
		302.34	0.00724504
		302.48	0.0072456
		302.62	0.007246
		302.76	0.00724627
		302.9	0.00724647
		303.04	0.00724662
		303.18	0.00724675
		303.32	0.00724689
		303.46	0.00724707
		303.6	0.00724732
		303.74	0.00724766
		303.88	0.0072481
		304.02	0.00724867
		304.16	0.00724937
		304.3	0.00725023
		304.44	0.00725125
		304.58	0.00725243
		304.72	0.00725378
		304.86	0.00725529
		305	0.00725698
		305.14	0.00725884
		305.28	0.00726086
		305.42	0.00726303
		305.56	0.00726534
		305.7	0.00726779
		305.84	0.00727035
		305.98	0.007273
		306.12	0.00727574
		306.26	0.00727853
		306.4	0.00728136
		306.54	0.00728419
		306.68	0.007287
		306.82	0.00728976
		306.96	0.00729244
		307.1	0.00729502
		307.24	0.00729745
		307.38	0.0072997
		307.52	0.00730173
		307.66	0.00730351
		307.8	0.00730499
		307.94	0.00730614
		308.08	0.00730692
		308.22	0.00730729
		308.36	0.0073072
		308.5	0.00730662
		308.64	0.0073055
		308.78	0.0073038
		308.92	0.00730147
		309.06	0.00729848
		309.2	0.00729479
		309.34	0.00729035
		309.48	0.00728513
		309.62	0.00727909
		309.76	0.00727218
		309.9	0.00726438
		310.04	0.00725564
		310.18	0.00724595
		310.32	0.00723525
		310.46	0.00722353
		310.6	0.00721077
		310.74	0.00719692
		310.88	0.00718198
		311.02	0.00716593
		311.16	0.00714874
		311.3	0.0071304
		311.44	0.00711091
		311.58	0.00709025
		311.72	0.00706842
		311.86	0.00704542
		312	0.00702126
		312.14	0.00699592
		312.28	0.00696944
		312.42	0.0069418
		312.56	0.00691304
		312.7	0.00688316
		312.84	0.00685219
		312.98	0.00682016
		313.12	0.00678709
		313.26	0.00675302
		313.4	0.00671796
		313.54	0.00668197
		313.68	0.00664508
		313.82	0.00660732
		313.96	0.00656876
		314.1	0.00652942
		314.24	0.00648936
		314.38	0.00644863
		314.52	0.00640727
		314.66	0.00636534
		314.8	0.00632288
		314.94	0.00627996
		315.08	0.00623664
		315.22	0.00619296
		315.36	0.00614898
		315.5	0.00610476
		315.64	0.00606034
		315.78	0.0060158
		315.92	0.00597117
		316.06	0.00592652
		316.2	0.00588189
		316.34	0.00583735
		316.48	0.00579293
		316.62	0.00574869
		316.76	0.00570468
		316.9	0.00566094
		317.04	0.00561752
		317.18	0.00557445
		317.32	0.00553178
		317.46	0.00548954
		317.6	0.00544778
		317.74	0.00540652
		317.88	0.00536579
		318.02	0.00532562
		318.16	0.00528605
		318.3	0.00524708
		318.44	0.00520876
		318.58	0.00517109
		318.72	0.00513409
		318.86	0.00509778
		319	0.00506217
		319.14	0.00502727
		319.28	0.00499308
		319.42	0.00495961
		319.56	0.00492688
		319.7	0.00489488
		319.84	0.00486361
		319.98	0.00483307
		320.12	0.00480326
		320.26	0.00477418
		320.4	0.00474581
		320.54	0.00471816
		320.68	0.00469121
		320.82	0.00466496
		320.96	0.00463939
		321.1	0.0046145
		321.24	0.00459027
		321.38	0.0045667
		321.52	0.00454377
		321.66	0.00452146
		321.8	0.00449977
		321.94	0.00447868
		322.08	0.00445817
		322.22	0.00443824
		322.36	0.00441887
		322.5	0.00440004
		322.64	0.00438174
		322.78	0.00436396
		322.92	0.00434667
		323.06	0.00432988
		323.2	0.00431356
		323.34	0.0042977
		323.48	0.00428229
		323.62	0.00426732
		323.76	0.00425277
		323.9	0.00423863
		324.04	0.00422489
		324.18	0.00421154
		324.32	0.00419857
		324.46	0.00418596
		324.6	0.0041737
		324.74	0.0041618
		324.88	0.00415023
		325.02	0.00413898
		325.16	0.00412805
		325.3	0.00411743
		325.44	0.00410711
		325.58	0.00409708
		325.72	0.00408733
		325.86	0.00407786
		326	0.00406865
		326.14	0.00405971
		326.28	0.00405101
		326.42	0.00404256
		326.56	0.00403435
		326.7	0.00402637
		326.84	0.00401861
		326.98	0.00401108
		327.12	0.00400375
		327.26	0.00399662
		327.4	0.0039897
		327.54	0.00398296
		327.68	0.00397641
		327.82	0.00397003
		327.96	0.00396383
		328.1	0.00395779
		328.24	0.00395191
		328.38	0.00394618
		328.52	0.00394059
		328.66	0.00393514
		328.8	0.00392983
		328.94	0.00392463
		329.08	0.00391956
		329.22	0.00391459
		329.36	0.00390973
		329.5	0.00390496
		329.64	0.00390028
		329.78	0.00389569
		329.92	0.00389116
		330.06	0.0038867
		330.2	0.00388231
		330.34	0.00387797
		330.48	0.00387367
		330.62	0.00386941
		330.76	0.00386517
		330.9	0.00386096
		331.04	0.00385676
		331.18	0.00385258
		331.32	0.00384839
		331.46	0.00384419
		331.6	0.00383998
		331.74	0.00383574
		331.88	0.00383148
		332.02	0.00382717
		332.16	0.00382282
		332.3	0.00381842
		332.44	0.00381395
		332.58	0.00380942
		332.72	0.0038048
		332.86	0.00380011
		333	0.00379532
		333.14	0.00379044
		333.28	0.00378546
		333.42	0.00378036
		333.56	0.00377514
		333.7	0.0037698
		333.84	0.00376432
		333.98	0.00375872
		334.12	0.00375297
		334.26	0.00374707
		334.4	0.00374101
		334.54	0.0037348
		334.68	0.00372842
		334.82	0.00372186
		334.96	0.00371514
		335.1	0.00370823
		335.24	0.00370113
		335.38	0.00369384
		335.52	0.00368637
		335.66	0.0036787
		335.8	0.00367082
		335.94	0.00366275
		336.08	0.00365447
		336.22	0.00364599
		336.36	0.00363729
		336.5	0.00362839
		336.64	0.00361926
		336.78	0.00360993
		336.92	0.00360039
		337.06	0.00359063
		337.2	0.00358066
		337.34	0.00357048
		337.48	0.00356008
		337.62	0.00354948
		337.76	0.00353867
		337.9	0.00352765
		338.04	0.00351643
		338.18	0.00350501
		338.32	0.00349339
		338.46	0.00348158
		338.6	0.00346958
		338.74	0.00345739
		338.88	0.00344502
		339.02	0.00343248
		339.16	0.00341976
		339.3	0.00340688
		339.44	0.00339384
		339.58	0.00338065
		339.72	0.0033673
		339.86	0.00335382
		340	0.0033402
		340.14	0.00332646
		340.28	0.00331259
		340.42	0.00329861
		340.56	0.00328452
		340.7	0.00327033
		340.84	0.00325604
		340.98	0.00324167
		341.12	0.00322723
		341.26	0.00321271
		341.4	0.00319812
		341.54	0.00318348
		341.68	0.00316879
		341.82	0.00315406
		341.96	0.00313929
		342.1	0.00312448
		342.24	0.00310966
		342.38	0.00309482
		342.52	0.00307996
		342.66	0.00306509
		342.8	0.00305023
		342.94	0.00303537
		343.08	0.00302052
		343.22	0.00300568
		343.36	0.00299086
		343.5	0.00297606
		343.64	0.00296129
		343.78	0.00294655
		343.92	0.00293183
		344.06	0.00291715
		344.2	0.0029025
		344.34	0.00288789
		344.48	0.00287332
		344.62	0.00285879
		344.76	0.00284431
		344.9	0.00282985
		345.04	0.00281545
		345.18	0.00280108
		345.32	0.00278676
		345.46	0.00277247
		345.6	0.00275822
		345.74	0.002744
		345.88	0.00272983
		346.02	0.00271569
		346.16	0.00270157
		346.3	0.00268749
		346.44	0.00267344
		346.58	0.0026594
		346.72	0.00264539
		346.86	0.0026314
		347	0.00261743
		347.14	0.00260347
		347.28	0.00258952
		347.42	0.00257558
		347.56	0.00256165
		347.7	0.00254772
		347.84	0.00253378
		347.98	0.00251985
		348.12	0.00250591
		348.26	0.00249196
		348.4	0.00247801
		348.54	0.00246404
		348.68	0.00245006
		348.82	0.00243606
		348.96	0.00242205
		349.1	0.00240801
		349.24	0.00239396
		349.38	0.00237989
		349.52	0.0023658
		349.66	0.00235168
		349.8	0.00233755
		349.94	0.00232339
		350.08	0.00230922
		350.22	0.00229502
		350.36	0.0022808
		350.5	0.00226657
		350.64	0.00225231
		350.78	0.00223804
		350.92	0.00222376
		351.06	0.00220947
		351.2	0.00219516
		351.34	0.00218085
		351.48	0.00216653
		351.62	0.00215221
		351.76	0.0021379
		351.9	0.00212358
		352.04	0.00210927
		352.18	0.00209497
		352.32	0.00208068
		352.46	0.00206641
		352.6	0.00205216
		352.74	0.00203794
		352.88	0.00202374
		353.02	0.00200956
		353.16	0.00199543
		353.3	0.00198132
		353.44	0.00196726
		353.58	0.00195324
		353.72	0.00193927
		353.86	0.00192534
		354	0.00191147
		354.14	0.00189765
		354.28	0.0018839
		354.42	0.0018702
		354.56	0.00185656
		354.7	0.00184299
		354.84	0.00182949
		354.98	0.00181605
		355.12	0.00180269
		355.26	0.0017894
		355.4	0.00177618
		355.54	0.00176304
		355.68	0.00174997
		355.82	0.00173698
		355.96	0.00172406
		356.1	0.00171123
		356.24	0.00169847
		356.38	0.00168579
		356.52	0.00167319
		356.66	0.00166066
		356.8	0.00164821
		356.94	0.00163583
		357.08	0.00162353
		357.22	0.00161131
		357.36	0.00159916
		357.5	0.00158708
		357.64	0.00157506
		357.78	0.00156312
		357.92	0.00155125
		358.06	0.00153944
		358.2	0.0015277
		358.34	0.00151601
		358.48	0.00150439
		358.62	0.00149282
		358.76	0.00148131
		358.9	0.00146986
		359.04	0.00145845
		359.18	0.0014471
		359.32	0.00143579
		359.46	0.00142453
		359.6	0.00141331
		359.74	0.00140214
		359.88	0.00139101
		360.02	0.00137991
		360.16	0.00136886
		360.3	0.00135783
		360.44	0.00134685
		360.58	0.00133589
		360.72	0.00132497
		360.86	0.00131408
		361	0.00130322
		361.14	0.00129238
		361.28	0.00128158
		361.42	0.0012708
		361.56	0.00126004
		361.7	0.00124932
		361.84	0.00123862
		361.98	0.00122794
		362.12	0.00121729
		362.26	0.00120667
		362.4	0.00119607
		362.54	0.0011855
		362.68	0.00117495
		362.82	0.00116443
		362.96	0.00115394
		363.1	0.00114348
		363.24	0.00113305
		363.38	0.00112265
		363.52	0.00111229
		363.66	0.00110195
		363.8	0.00109165
		363.94	0.00108139
		364.08	0.00107116
		364.22	0.00106097
		364.36	0.00105083
		364.5	0.00104072
		364.64	0.00103065
		364.78	0.00102064
		364.92	0.00101066
		365.06	0.00100074
		365.2	0.000990863
		365.34	0.00098104
		365.48	0.00097127
		365.62	0.000961551
		365.76	0.000951891
		365.9	0.000942289
		366.04	0.000932746
		366.18	0.000923263
		366.32	0.000913842
		366.46	0.000904481
		366.6	0.000895188
		366.74	0.000885959
		366.88	0.000876799
		367.02	0.000867708
		367.16	0.000858686
		367.3	0.000849734
		367.44	0.000840854
		367.58	0.000832045
		367.72	0.00082331
		367.86	0.000814645
		368	0.000806058
		368.14	0.000797545
		368.28	0.000789108
		368.42	0.000780747
		368.56	0.000772462
		368.7	0.000764253
		368.84	0.000756121
		368.98	0.000748066
		369.12	0.000740087
		369.26	0.00073218
		369.4	0.000724357
		369.54	0.00071661
		369.68	0.00070894
		369.82	0.000701347
		369.96	0.00069383
		370.1	0.00068639
		370.24	0.000679026
		370.38	0.000671738
		370.52	0.000664526
		370.66	0.000657391
		370.8	0.00065033
		370.94	0.000643342
		371.08	0.00063643
		371.22	0.000629591
		371.36	0.000622824
		371.5	0.000616133
		371.64	0.000609515
		371.78	0.000602971
		371.92	0.000596499
		372.06	0.000590099
		372.2	0.000583772
		372.34	0.000577517
		372.48	0.000571334
		372.62	0.000565223
		372.76	0.000559184
		372.9	0.000553216
		373.04	0.00054732
		373.18	0.000541495
		373.32	0.000535742
		373.46	0.000530057
		373.6	0.000524448
		373.74	0.00051891
		373.88	0.000513444
		374.02	0.000508047
		374.16	0.000502725
		374.3	0.000497476
		374.44	0.000492299
		374.58	0.000487195
		374.72	0.000482163
		374.86	0.000477204
		375	0.000472319
		375.14	0.000467507
		375.28	0.000462768
		375.42	0.000458104
		375.56	0.000453513
		375.7	0.000448996
		375.84	0.000444553
		375.98	0.000440185
		376.12	0.00043589
		376.26	0.00043167
		376.4	0.000427524
		376.54	0.000423452
		376.68	0.000419454
		376.82	0.000415529
		376.96	0.000411678
		377.1	0.0004079
		377.24	0.000404194
		377.38	0.000400561
		377.52	0.000396999
		377.66	0.000393509
		377.8	0.000390088
		377.94	0.000386737
		378.08	0.000383454
		378.22	0.000380239
		378.36	0.000377091
		378.5	0.000374008
		378.64	0.000370989
		378.78	0.000368032
		378.92	0.000365138
		379.06	0.0003623
		379.2	0.000359523
		379.34	0.000356803
		379.48	0.000354137
		379.62	0.000351525
		379.76	0.000348964
		379.9	0.000346451
		380.04	0.000343986
		380.18	0.000341565
		380.32	0.000339184
		380.46	0.000336846
		380.6	0.000334544
		380.74	0.000332279
		380.88	0.000330048
		381.02	0.000327848
		381.16	0.000325675
		381.3	0.000323528
		381.44	0.000321404
		381.58	0.0003193
		381.72	0.000317214
		381.86	0.000315143
		382	0.000313084
		382.14	0.000311035
		382.28	0.000308994
		382.42	0.000306957
		382.56	0.00030492
		382.7	0.000302885
		382.84	0.000300847
		382.98	0.000298804
		383.12	0.000296753
		383.26	0.000294692
		383.4	0.000292619
		383.54	0.000290529
		383.68	0.000288425
		383.82	0.000286302
		383.96	0.000284159
		384.1	0.000281994
		384.24	0.000279804
		384.38	0.000277589
		384.52	0.000275347
		384.66	0.000273075
		384.8	0.000270774
		384.94	0.000268442
		385.08	0.000266077
		385.22	0.000263679
		385.36	0.000261247
		385.5	0.00025878
		385.64	0.000256278
		385.78	0.00025374
		385.92	0.000251166
		386.06	0.000248555
		386.2	0.000245909
		386.34	0.000243229
		386.48	0.00024051
		386.62	0.000237755
		386.76	0.000234965
		386.9	0.00023214
		387.04	0.000229281
		387.18	0.000226389
		387.32	0.000223461
		387.46	0.000220505
		387.6	0.000217519
		387.74	0.000214503
		387.88	0.00021146
		388.02	0.000208388
		388.16	0.000205294
		388.3	0.000202177
		388.44	0.000199038
		388.58	0.000195879
		388.72	0.000192702
		388.86	0.000189509
		389	0.000186301
		389.14	0.000183082
		389.28	0.000179852
		389.42	0.000176611
		389.56	0.000173367
		389.7	0.000170119
		389.84	0.000166869
		389.98	0.000163619
		390.12	0.000160372
		390.26	0.000157129
		390.4	0.000153894
		390.54	0.000150664
		390.68	0.000147448
		390.82	0.000144246
		390.96	0.000141056
		391.1	0.000137887
		391.24	0.000134738
		391.38	0.000131607
		391.52	0.000128503
		391.66	0.000125421
		391.8	0.00012237
		391.94	0.000119348
		392.08	0.000116357
		392.22	0.000113402
		392.36	0.000110476
		392.5	0.000107589
		392.64	0.00010474
		392.78	0.00010193
		392.92	9.91605e-05
		393.06	9.64331e-05
		393.2	9.37488e-05
		393.34	9.11091e-05
		393.48	8.85149e-05
		393.62	8.59674e-05
		393.76	8.34675e-05
		393.9	8.10162e-05
		394.04	7.86143e-05
		394.18	7.62626e-05
		394.32	7.39617e-05
		394.46	7.17122e-05
		394.6	6.95148e-05
		394.74	6.73698e-05
		394.88	6.52776e-05
		395.02	6.32387e-05
		395.16	6.12504e-05
		395.3	5.93187e-05
		395.44	5.74408e-05
		395.58	5.56167e-05
		395.72	5.38465e-05
		395.86	5.213e-05
		396	5.04672e-05
		396.14	4.88578e-05
		396.28	4.73018e-05
		396.42	4.57987e-05
		396.56	4.43483e-05
		396.7	4.29503e-05
		396.84	4.16042e-05
		396.98	4.03095e-05
		397.12	3.90659e-05
		397.26	3.78728e-05
		397.4	3.67296e-05
		397.54	3.56358e-05
		397.68	3.45908e-05
		397.82	3.35939e-05
		397.96	3.26445e-05
		398.1	3.17391e-05
		398.24	3.08829e-05
		398.38	3.00721e-05
		398.52	2.93061e-05
		398.66	2.85841e-05
		398.8	2.79054e-05
		398.94	2.72693e-05
		399.08	2.66749e-05
		399.22	2.61217e-05
		399.36	2.56089e-05
		399.5	2.51356e-05
		399.64	2.47013e-05
		399.78	2.43052e-05
		399.92	2.39465e-05
		400.06	2.36246e-05
		400.2	2.33388e-05
		400.34	2.30884e-05
		400.48	2.28728e-05
		400.62	2.26912e-05
		400.76	2.25431e-05
		400.9	2.24279e-05
		401.04	2.23449e-05
		401.18	2.22935e-05
		401.32	2.22733e-05
		401.46	2.22837e-05
		401.6	2.23213e-05
		401.74	2.23916e-05
		401.88	2.2491e-05
		402.02	2.26191e-05
		402.16	2.27754e-05
		402.3	2.29595e-05
		402.44	2.31711e-05
		402.58	2.34099e-05
		402.72	2.36754e-05
		402.86	2.39675e-05
		403	2.42858e-05
		403.14	2.46301e-05
		403.28	2.50003e-05
		403.42	2.5396e-05
		403.56	2.58172e-05
		403.7	2.62637e-05
		403.84	2.67355e-05
		403.98	2.72323e-05
		404.12	2.77542e-05
		404.26	2.83011e-05
		404.4	2.8873e-05
		404.54	2.94699e-05
		404.68	3.00918e-05
		404.82	3.07389e-05
		404.96	3.14112e-05
		405.1	3.21087e-05
		405.24	3.28317e-05
		405.38	3.35802e-05
		405.52	3.43545e-05
		405.66	3.51547e-05
		405.8	3.5981e-05
		405.94	3.68337e-05
		406.08	3.7713e-05
		406.22	3.86192e-05
		406.36	3.95525e-05
		406.5	4.05133e-05
		406.64	4.15019e-05
		406.78	4.25186e-05
		406.92	4.35637e-05
		407.06	4.46376e-05
		407.2	4.57407e-05
		407.34	4.68734e-05
		407.48	4.8036e-05
		407.62	4.9229e-05
		407.76	5.04527e-05
		407.9	5.17077e-05
		408.04	5.29943e-05
		408.18	5.4313e-05
		408.32	5.56642e-05
		408.46	5.70483e-05
		408.6	5.84659e-05
		408.74	5.99173e-05
		408.88	6.14031e-05
		409.02	6.29236e-05
		409.16	6.44794e-05
		409.3	6.60709e-05
		409.44	6.76957e-05
		409.58	6.93601e-05
		409.72	7.10616e-05
		409.86	7.28005e-05
		410	7.45773e-05
		410.14	7.63923e-05
		410.28	7.82461e-05
		410.42	8.0139e-05
		410.56	8.20714e-05
		410.7	8.40436e-05
		410.84	8.60561e-05
		410.98	8.81091e-05
		411.12	9.02029e-05
		411.26	9.23379e-05
		411.4	9.45144e-05
		411.54	9.67325e-05
		411.68	9.89925e-05
		411.82	0.000101295
		411.96	0.000103639
		412.1	0.000106026
		412.24	0.000108455
		412.38	0.000110927
		412.52	0.000113442
		412.66	0.000115999
		412.8	0.000118599
		412.94	0.000121242
		413.08	0.000123927
		413.22	0.000126654
		413.36	0.000129424
		413.5	0.000132235
		413.64	0.000135088
		413.78	0.000137983
		413.92	0.000140919
		414.06	0.000143895
		414.2	0.000146911
		414.34	0.000149967
		414.48	0.000153059
		414.62	0.000156193
		414.76	0.000159364
		414.9	0.000162573
		415.04	0.000165818
		415.18	0.000169098
		415.32	0.000172413
		415.46	0.000175762
		415.6	0.000179143
		415.74	0.000182556
		415.88	0.000185999
		416.02	0.000189472
		416.16	0.000192972
		416.3	0.0001965
		416.44	0.00020005
		416.58	0.000203627
		416.72	0.000207227
		416.86	0.000210848
		417	0.000214488
		417.14	0.000218146
		417.28	0.000221821
		417.42	0.00022551
		417.56	0.000229212
		417.7	0.000232924
		417.84	0.000236646
		417.98	0.000240375
		418.12	0.000244109
		418.26	0.000247845
		418.4	0.00025158
		418.54	0.000255317
		418.68	0.00025905
		418.82	0.000262778
		418.96	0.000266498
		419.1	0.000270208
		419.24	0.000273906
		419.38	0.000277589
		419.52	0.000281255
		419.66	0.000284901
		419.8	0.000288526
		419.94	0.000292126
		420.08	0.0002957
		420.22	0.000299245
		420.36	0.000302758
		420.5	0.000306236
		420.64	0.000309678
		420.78	0.000313081
		420.92	0.000316443
		421.06	0.00031976
		421.2	0.000323031
		421.34	0.000326253
		421.48	0.000329423
		421.62	0.000332539
		421.76	0.0003356
		421.9	0.000338601
		422.04	0.000341541
		422.18	0.000344418
		422.32	0.00034723
		422.46	0.000349973
		422.6	0.000352646
		422.74	0.000355247
		422.88	0.000357774
		423.02	0.000360224
		423.16	0.000362596
		423.3	0.000364887
		423.44	0.000367096
		423.58	0.00036922
		423.72	0.000371259
		423.86	0.000373209
		424	0.000375071
		424.14	0.000376842
		424.28	0.00037852
		424.42	0.000380105
		424.56	0.000381594
		424.7	0.000382987
		424.84	0.000384283
		424.98	0.00038548
		425.12	0.000386578
		425.26	0.000387575
		425.4	0.000388471
		425.54	0.000389264
		425.68	0.000389956
		425.82	0.000390544
		425.96	0.000391028
		426.1	0.000391409
		426.24	0.000391685
		426.38	0.000391857
		426.52	0.000391925
		426.66	0.000391888
		426.8	0.000391747
		426.94	0.000391502
		427.08	0.000391154
		427.22	0.000390702
		427.36	0.000390147
		427.5	0.00038949
		427.64	0.000388732
		427.78	0.000387873
		427.92	0.000386914
		428.06	0.000385856
		428.2	0.0003847
		428.34	0.000383448
		428.48	0.000382099
		428.62	0.000380657
		428.76	0.000379122
		428.9	0.000377495
		429.04	0.000375778
		429.18	0.000373972
		429.32	0.00037208
		429.46	0.000370103
		429.6	0.000368042
		429.74	0.0003659
		429.88	0.000363678
		430.02	0.000361378
		430.16	0.000359002
		430.3	0.000356553
		430.44	0.000354032
		430.58	0.000351441
		430.72	0.000348783
		430.86	0.000346059
		431	0.000343272
		431.14	0.000340425
		431.28	0.000337519
		431.42	0.000334556
		431.56	0.00033154
		431.7	0.000328472
		431.84	0.000325354
		431.98	0.00032219
		432.12	0.00031898
		432.26	0.000315729
		432.4	0.000312437
		432.54	0.000309108
		432.68	0.000305743
		432.82	0.000302346
		432.96	0.000298917
		433.1	0.000295461
		433.24	0.000291978
		433.38	0.000288471
		433.52	0.000284943
		433.66	0.000281396
		433.8	0.000277831
		433.94	0.000274252
		434.08	0.00027066
		434.22	0.000267057
		434.36	0.000263445
		434.5	0.000259827
		434.64	0.000256204
		434.78	0.000252579
		434.92	0.000248953
		435.06	0.000245328
		435.2	0.000241707
		435.34	0.00023809
		435.48	0.00023448
		435.62	0.000230878
		435.76	0.000227287
		435.9	0.000223706
		436.04	0.00022014
		436.18	0.000216588
		436.32	0.000213052
		436.46	0.000209533
		436.6	0.000206034
		436.74	0.000202555
		436.88	0.000199098
		437.02	0.000195663
		437.16	0.000192253
		437.3	0.000188867
		437.44	0.000185508
		437.58	0.000182176
		437.72	0.000178873
		437.86	0.000175598
		438	0.000172353
		438.14	0.00016914
		438.28	0.000165958
		438.42	0.000162808
		438.56	0.000159691
		438.7	0.000156608
		438.84	0.000153559
		438.98	0.000150545
		439.12	0.000147567
		439.26	0.000144624
		439.4	0.000141718
		439.54	0.000138848
		439.68	0.000136015
		439.82	0.000133219
		439.96	0.000130461
		440.1	0.000127741
		440.24	0.000125059
		440.38	0.000122415
		440.52	0.00011981
		440.66	0.000117242
		440.8	0.000114714
		440.94	0.000112223
		441.08	0.000109772
		441.22	0.000107359
		441.36	0.000104984
		441.5	0.000102648
		441.64	0.00010035
		441.78	9.80897e-05
		441.92	9.58679e-05
		442.06	9.3684e-05
		442.2	9.15378e-05
		442.34	8.94291e-05
		442.48	8.73577e-05
		442.62	8.53233e-05
		442.76	8.33257e-05
		442.9	8.13645e-05
		443.04	7.94396e-05
		443.18	7.75505e-05
		443.32	7.56971e-05
		443.46	7.38789e-05
		443.6	7.20956e-05
		443.74	7.03469e-05
		443.88	6.86324e-05
		444.02	6.69517e-05
		444.16	6.53045e-05
		444.3	6.36904e-05
		444.44	6.21089e-05
		444.58	6.05597e-05
		444.72	5.90423e-05
		444.86	5.75564e-05
		445	5.61016e-05
		445.14	5.46773e-05
		445.28	5.32833e-05
		445.42	5.1919e-05
		445.56	5.0584e-05
		445.7	4.9278e-05
		445.84	4.80004e-05
		445.98	4.67508e-05
		446.12	4.55289e-05
		446.26	4.43341e-05
		446.4	4.3166e-05
		446.54	4.20242e-05
		446.68	4.09083e-05
		446.82	3.98177e-05
		446.96	3.87522e-05
		447.1	3.77113e-05
		447.24	3.66944e-05
		447.38	3.57013e-05
		447.52	3.47315e-05
		447.66	3.37845e-05
		447.8	3.286e-05
		447.94	3.19575e-05
		448.08	3.10766e-05
		448.22	3.02169e-05
		448.36	2.9378e-05
		448.5	2.85595e-05
		448.64	2.77611e-05
		448.78	2.69822e-05
		448.92	2.62226e-05
		449.06	2.54819e-05
		449.2	2.47596e-05
		449.34	2.40553e-05
		449.48	2.33688e-05
		449.62	2.26997e-05
		449.76	2.20475e-05
		449.9	2.1412e-05
		450.04	2.07928e-05
		450.18	2.01895e-05
		450.32	1.96018e-05
		450.46	1.90294e-05
		450.6	1.84719e-05
		450.74	1.7929e-05
		450.88	1.74003e-05
		451.02	1.68857e-05
		451.16	1.63847e-05
		451.3	1.5897e-05
		451.44	1.54224e-05
		451.58	1.49605e-05
		451.72	1.45111e-05
		451.86	1.40738e-05
		452	1.36484e-05
		452.14	1.32346e-05
		452.28	1.28322e-05
		452.42	1.24408e-05
		452.56	1.20602e-05
		452.7	1.16902e-05
		452.84	1.13305e-05
		452.98	1.09808e-05
		453.12	1.06409e-05
		453.26	1.03105e-05
		453.4	9.98952e-06
		453.54	9.6776e-06
		453.68	9.37455e-06
		453.82	9.08016e-06
		453.96	8.79419e-06
		454.1	8.51644e-06
		454.24	8.24671e-06
		454.38	7.98478e-06
		454.52	7.73047e-06
		454.66	7.48356e-06
		454.8	7.24388e-06
		454.94	7.01123e-06
		455.08	6.78543e-06
		455.22	6.5663e-06
		455.36	6.35367e-06
		455.5	6.14737e-06
		455.64	5.94722e-06
		455.78	5.75306e-06
		455.92	5.56473e-06
		456.06	5.38209e-06
		456.2	5.20496e-06
		456.34	5.0332e-06
		456.48	4.86667e-06
		456.62	4.70523e-06
		456.76	4.54872e-06
		456.9	4.39702e-06
		457.04	4.25e-06
		457.18	4.10752e-06
		457.32	3.96946e-06
		457.46	3.83569e-06
		457.6	3.70609e-06
		457.74	3.58054e-06
		457.88	3.45894e-06
		458.02	3.34116e-06
		458.16	3.2271e-06
		458.3	3.11665e-06
		458.44	3.0097e-06
		458.58	2.90616e-06
		458.72	2.80593e-06
		458.86	2.70891e-06
		459	2.615e-06
		459.14	2.52412e-06
		459.28	2.43617e-06
		459.42	2.35107e-06
		459.56	2.26874e-06
		459.7	2.1863e-06
		459.84	2.10949e-06
		459.98	2.03519e-06
		460.12	1.96332e-06
		460.26	1.8938e-06
		460.4	1.82657e-06
		460.54	1.76156e-06
		460.68	1.6987e-06
		460.82	1.63793e-06
		460.96	1.57918e-06
		461.1	1.52239e-06
		461.24	1.4675e-06
		461.38	1.41445e-06
		461.52	1.36319e-06
		461.66	1.31366e-06
		461.8	1.26581e-06
		461.94	1.21959e-06
		462.08	1.17493e-06
		462.22	1.13181e-06
		462.36	1.09015e-06
		462.5	1.04993e-06
		462.64	1.0111e-06
		462.78	9.73603e-07
		462.92	9.37406e-07
		463.06	9.02466e-07
		463.2	8.68742e-07
		463.34	8.36196e-07
		463.48	8.04789e-07
		463.62	7.74485e-07
		463.76	7.45247e-07
		463.9	7.17041e-07
		464.04	6.89833e-07
		464.18	6.63591e-07
		464.32	6.38282e-07
		464.46	6.13876e-07
		464.6	5.90344e-07
		464.74	5.67655e-07
		464.88	5.45783e-07
		465.02	5.24699e-07
		465.16	5.04378e-07
		465.3	4.84794e-07
		465.44	4.65922e-07
		465.58	4.47738e-07
		465.72	4.30218e-07
		465.86	4.13341e-07
		466	3.97084e-07
		466.14	3.81426e-07
		466.28	3.66347e-07
		466.42	3.51826e-07
		466.56	3.37845e-07
		466.7	3.24385e-07
		466.84	3.11428e-07
		466.98	2.98956e-07
		467.12	2.86952e-07
		467.26	2.75401e-07
		467.4	2.64285e-07
		467.54	2.53591e-07
		467.68	2.43303e-07
		467.82	2.33406e-07
		467.96	2.23887e-07
		468.1	2.14733e-07
		468.24	2.0593e-07
		468.38	1.97466e-07
		468.52	1.89329e-07
		468.66	1.81506e-07
		468.8	1.73987e-07
		468.94	1.66761e-07
		469.08	1.59817e-07
		469.22	1.53145e-07
		469.36	1.46734e-07
		469.5	1.40576e-07
		469.64	1.3466e-07
		469.78	1.28979e-07
		469.92	1.23523e-07
		470.06	1.18285e-07
		470.2	1.10292e-07
		470.34	1.05668e-07
		470.48	1.01224e-07
		470.62	9.69537e-08
		470.76	9.28513e-08
		470.9	8.89105e-08
		471.04	8.51255e-08
		471.18	8.14907e-08
		471.32	7.80006e-08
		471.46	7.46499e-08
		471.6	7.14336e-08
		471.74	6.83466e-08
		471.88	6.53842e-08
		472.02	6.25418e-08
		472.16	5.9815e-08
		472.3	5.71993e-08
		472.44	5.46907e-08
		472.58	5.2285e-08
		472.72	4.99784e-08
		472.86	4.77672e-08
		473	4.56476e-08
		473.14	4.36163e-08
		473.28	4.16697e-08
		473.42	3.98047e-08
		473.56	3.8018e-08
		473.7	3.63066e-08
		473.84	3.46676e-08
		473.98	3.30981e-08
		474.12	3.15954e-08
		474.26	3.01569e-08
		474.4	2.87801e-08
		474.54	2.74623e-08
		474.68	2.62014e-08
		474.82	2.49951e-08
		474.96	2.3841e-08
		475.1	2.27372e-08
		475.24	2.16816e-08
		475.38	2.06722e-08
		475.52	1.97071e-08
		475.66	1.87846e-08
		475.8	1.79028e-08
		475.94	1.70602e-08
		476.08	1.6255e-08
		476.22	1.54857e-08
		476.36	1.47509e-08
		476.5	1.4049e-08
		476.64	1.33788e-08
		476.78	1.27387e-08
		476.92	1.21277e-08
		477.06	1.15445e-08
		477.2	1.09878e-08
		477.34	1.04565e-08
		477.48	9.9496e-09
		477.62	9.466e-09
		477.76	9.00468e-09
		477.9	8.5647e-09
		478.04	8.14512e-09
		478.18	7.74505e-09
		478.32	7.36364e-09
		478.46	7.00007e-09
		478.6	6.65356e-09
		478.74	6.32335e-09
		478.88	6.00872e-09
		479.02	5.70897e-09
		479.16	5.42345e-09
		479.3	5.15152e-09
		479.44	4.89256e-09
		479.58	4.646e-09
		479.72	4.41126e-09
		479.86	4.18783e-09
[truncated: 1 more rows]

## Sheet: PlotDat16
Source sheet	Late Permian rocks	200	0	233.6	0	200	0
Plot name	ProbDens12	200.14	0	239.2	0	479.86	0
Plot Type	16	200.28	0	239.2	2
1st free col	9	200.42	0	233.6	2
Sigma Level	1	200.56	0	233.6	0
Absolute Errs	TRUE	200.7	0	ErrBox	ErrBox
Symbol Type	1	200.84	0	239.2	0
Inverse Plot	FALSE	200.98	0	244.8	0
Color Plot	TRUE	201.12	0	244.8	14
3D plot	FALSE	201.26	0	239.2	14
Linear	FALSE	201.4	0	239.2	0
Data Range	AA1:AB406	201.54	0	ErrBox	ErrBox
Filled Symbols	FALSE	201.68	0	244.8	0
ConcAge	FALSE	201.82	0	250.4	0
ConcSwap	FALSE	201.96	0	250.4	15
1st Symbol-row	1	202.1	0	244.8	15
		202.24	0	244.8	0
		202.38	0	ErrBox	ErrBox
		202.52	0	250.4	0
		202.66	0	256	0
		202.8	0	256	27
		202.94	0	250.4	27
		203.08	0	250.4	0
		203.22	0	ErrBox	ErrBox
		203.36	0	256	0
		203.5	0	261.6	0
		203.64	0	261.6	45
		203.78	0	256	45
		203.92	3.10552e-09	256	0
		204.06	3.38372e-09	ErrBox	ErrBox
		204.2	3.68558e-09	261.6	0
		204.34	4.013e-09	267.2	0
		204.48	4.36802e-09	267.2	49
		204.62	4.75283e-09	261.6	49
		204.76	5.16977e-09	261.6	0
		204.9	5.62137e-09	ErrBox	ErrBox
		205.04	6.11033e-09	267.2	0
		205.18	6.63956e-09	272.8	0
		205.32	7.21216e-09	272.8	31
		205.46	7.83148e-09	267.2	31
		205.6	8.50108e-09	267.2	0
		205.74	9.22478e-09	ErrBox	ErrBox
		205.88	1.00067e-08	272.8	0
		206.02	1.08511e-08	278.4	0
		206.16	1.17629e-08	278.4	18
		206.3	1.27468e-08	272.8	18
		206.44	1.38084e-08	272.8	0
		206.58	1.49533e-08	ErrBox	ErrBox
		206.72	1.61876e-08	278.4	0
		206.86	1.75177e-08	284	0
		207	1.89508e-08	284	8
		207.14	2.0494e-08	278.4	8
		207.28	2.21554e-08	278.4	0
		207.42	2.39433e-08	ErrBox	ErrBox
		207.56	2.58666e-08	284	0
		207.7	2.79349e-08	289.6	0
		207.84	3.01583e-08	289.6	9
		207.98	3.25476e-08	284	9
		208.12	3.51141e-08	284	0
		208.26	4.08995e-08	ErrBox	ErrBox
		208.4	4.71564e-08	289.6	0
		208.54	5.09636e-08	295.2	0
		208.68	5.50617e-08	295.2	7
		208.82	5.94716e-08	289.6	7
		208.96	6.42154e-08	289.6	0
		209.1	6.9317e-08	ErrBox	ErrBox
		209.24	7.48015e-08	295.2	0
		209.38	8.0696e-08	300.8	0
		209.52	8.70289e-08	300.8	18
		209.66	9.3831e-08	295.2	18
		209.8	1.01135e-07	295.2	0
		209.94	1.08974e-07	ErrBox	ErrBox
		210.08	1.17387e-07	300.8	0
		210.22	1.26411e-07	306.4	0
		210.36	1.36089e-07	306.4	8
		210.5	1.46464e-07	300.8	8
		210.64	1.57583e-07	300.8	0
		210.78	1.69497e-07	ErrBox	ErrBox
		210.92	1.82257e-07	306.4	0
		211.06	1.95919e-07	312	0
		211.2	2.10543e-07	312	19
		211.34	2.26192e-07	306.4	19
		211.48	2.42931e-07	306.4	0
		211.62	2.60833e-07	ErrBox	ErrBox
		211.76	2.7997e-07	312	0
		211.9	3.00423e-07	317.6	0
		212.04	3.22274e-07	317.6	11
		212.18	3.45611e-07	312	11
		212.32	3.7053e-07	312	0
		212.46	3.97126e-07	ErrBox	ErrBox
		212.6	4.25506e-07	317.6	0
		212.74	4.55778e-07	323.2	0
		212.88	4.88059e-07	323.2	7
		213.02	5.22471e-07	317.6	7
		213.16	5.59144e-07	317.6	0
		213.3	5.98212e-07	ErrBox	ErrBox
		213.44	6.39819e-07	323.2	0
		213.58	6.84117e-07	328.8	0
		213.72	7.31263e-07	328.8	9
		213.86	7.81425e-07	323.2	9
		214	8.34778e-07	323.2	0
		214.14	8.91508e-07	ErrBox	ErrBox
		214.28	9.51808e-07	328.8	0
		214.42	1.01588e-06	334.4	0
		214.56	1.08394e-06	334.4	7
		214.7	1.15622e-06	328.8	7
		214.84	1.23294e-06	328.8	0
		214.98	1.31751e-06	ErrBox	ErrBox
		215.12	1.4041e-06	334.4	0
		215.26	1.49593e-06	340	0
		215.4	1.59329e-06	340	7
		215.54	1.69964e-06	334.4	7
		215.68	1.81269e-06	334.4	0
		215.82	1.9294e-06	ErrBox	ErrBox
		215.96	2.05303e-06	340	0
		216.1	2.19037e-06	345.6	0
		216.24	2.33289e-06	345.6	3
		216.38	2.4809e-06	340	3
		216.52	2.63759e-06	340	0
		216.66	2.80341e-06	ErrBox	ErrBox
		216.8	2.97886e-06	345.6	0
		216.94	3.16443e-06	351.2	0
		217.08	3.36066e-06	351.2	8
		217.22	3.57141e-06	345.6	8
		217.36	3.79103e-06	345.6	0
		217.5	4.02309e-06	ErrBox	ErrBox
		217.64	4.27137e-06	351.2	0
		217.78	4.53045e-06	356.8	0
		217.92	4.80402e-06	356.8	4
		218.06	5.0928e-06	351.2	4
		218.2	5.39758e-06	351.2	0
		218.34	5.71914e-06	ErrBox	ErrBox
		218.48	6.05835e-06	356.8	0
		218.62	6.41609e-06	362.4	0
		218.76	6.79327e-06	362.4	3
		218.9	7.19385e-06	356.8	3
		219.04	7.61328e-06	356.8	0
		219.18	8.05525e-06	ErrBox	ErrBox
		219.32	8.52085e-06	368	0
		219.46	9.01126e-06	373.6	0
		219.6	9.5339e-06	373.6	2
		219.74	1.00782e-05	368	2
		219.88	1.06512e-05	368	0
		220.02	1.12543e-05	ErrBox	ErrBox
		220.16	1.18889e-05	384.8	0
		220.3	1.25566e-05	390.4	0
		220.44	1.32589e-05	390.4	1
		220.58	1.39975e-05	384.8	1
		220.72	1.47741e-05	384.8	0
		220.86	1.55906e-05	ErrBox	ErrBox
		221	1.64489e-05	424	0
		221.14	1.73509e-05	429.6	0
		221.28	1.82988e-05	429.6	3
		221.42	1.92946e-05	424	3
		221.56	2.03406e-05	424	0
		221.7	2.14426e-05	ErrBox	ErrBox
		221.84	2.25968e-05
		221.98	2.38088e-05
		222.12	2.50941e-05
		222.26	2.64319e-05
		222.4	2.78394e-05
		222.54	2.93138e-05
		222.68	3.08642e-05
		222.82	3.24884e-05
		222.96	3.41926e-05
		223.1	3.59805e-05
		223.24	3.78561e-05
		223.38	3.98235e-05
		223.52	4.18869e-05
		223.66	4.40509e-05
		223.8	4.632e-05
		223.94	4.86993e-05
		224.08	5.11969e-05
		224.22	5.38122e-05
		224.36	5.65537e-05
		224.5	5.94271e-05
		224.64	6.24419e-05
		224.78	6.56048e-05
		224.92	6.89164e-05
		225.06	7.23837e-05
		225.2	7.60166e-05
		225.34	7.98259e-05
		225.48	8.38138e-05
		225.62	8.79913e-05
		225.76	9.23672e-05
		225.9	9.6957e-05
		226.04	0.000101758
		226.18	0.000106787
		226.32	0.000112056
		226.46	0.000117573
		226.6	0.000123348
		226.74	0.000129397
		226.88	0.000135731
		227.02	0.000142362
		227.16	0.000149307
		227.3	0.000156574
		227.44	0.000164181
		227.58	0.000172147
		227.72	0.000180477
		227.86	0.000189195
		228	0.000198317
		228.14	0.000207863
		228.28	0.000217849
		228.42	0.000228299
		228.56	0.00023923
		228.7	0.000250667
		228.84	0.000262628
		228.98	0.000275132
		229.12	0.000288205
		229.26	0.000301871
		229.4	0.000316158
		229.54	0.000331082
		229.68	0.000346673
		229.82	0.000362959
		229.96	0.00037997
		230.1	0.000397727
		230.24	0.000416265
		230.38	0.000435608
		230.52	0.000455784
		230.66	0.000476823
		230.8	0.000498759
		230.94	0.000521615
		231.08	0.000545424
		231.22	0.000570214
		231.36	0.00059602
		231.5	0.000622874
		231.64	0.000650792
		231.78	0.000679806
		231.92	0.000709946
		232.06	0.000741239
		232.2	0.000773711
		232.34	0.00080739
		232.48	0.000842299
		232.62	0.000878469
		232.76	0.000915901
		232.9	0.000954631
		233.04	0.000994669
		233.18	0.00103603
		233.32	0.00107874
		233.46	0.0011228
		233.6	0.00116823
		233.74	0.00121503
		233.88	0.00126321
		234.02	0.00131277
		234.16	0.00136372
		234.3	0.00141606
		234.44	0.00146978
		234.58	0.00152488
		234.72	0.00158135
		234.86	0.00163918
		235	0.00169836
		235.14	0.00175887
		235.28	0.00182069
		235.42	0.00188383
		235.56	0.00194824
		235.7	0.00201392
		235.84	0.00208084
		235.98	0.00214897
		236.12	0.00221829
		236.26	0.00228878
		236.4	0.00236039
		236.54	0.00243313
		236.68	0.00250694
		236.82	0.00258181
		236.96	0.0026577
		237.1	0.00273458
		237.24	0.00281244
		237.38	0.00289123
		237.52	0.00297093
		237.66	0.00305152
		237.8	0.00313296
		237.94	0.00321523
		238.08	0.0032983
		238.22	0.00338216
		238.36	0.00346678
		238.5	0.00355214
		238.64	0.0036382
		238.78	0.00372495
		238.92	0.00381238
		239.06	0.00390045
		239.2	0.00398916
		239.34	0.00407848
		239.48	0.0041684
		239.62	0.00425891
		239.76	0.00434998
		239.9	0.00444161
		240.04	0.00453377
		240.18	0.00462645
		240.32	0.00471964
		240.46	0.00481332
		240.6	0.00490748
		240.74	0.00500212
		240.88	0.0050972
		241.02	0.00519273
		241.16	0.00528869
		241.3	0.00538507
		241.44	0.00548185
		241.58	0.00557902
		241.72	0.00567657
		241.86	0.0057745
		242	0.00587279
		242.14	0.00597142
		242.28	0.00607039
		242.42	0.00616968
		242.56	0.0062693
		242.7	0.00636922
		242.84	0.00646945
		242.98	0.00656997
		243.12	0.0066708
		243.26	0.00677191
		243.4	0.0068733
		243.54	0.00697498
		243.68	0.00707694
		243.82	0.00717919
		243.96	0.00728172
		244.1	0.00738456
		244.24	0.0074877
		244.38	0.00759114
		244.52	0.00769489
		244.66	0.00779897
		244.8	0.00790339
		244.94	0.00800817
		245.08	0.00811331
		245.22	0.00821884
		245.36	0.00832476
		245.5	0.00843111
		245.64	0.0085379
		245.78	0.00864515
		245.92	0.00875286
		246.06	0.00886109
		246.2	0.00896982
		246.34	0.0090791
		246.48	0.00918894
		246.62	0.00929937
		246.76	0.00941039
		246.9	0.00952203
		247.04	0.00963431
		247.18	0.00974724
		247.32	0.00986085
		247.46	0.00997513
		247.6	0.0100901
		247.74	0.0102058
		247.88	0.0103222
		248.02	0.0104394
		248.16	0.0105572
		248.3	0.0106758
		248.44	0.0107951
		248.58	0.0109152
		248.72	0.011036
		248.86	0.0111575
		249	0.0112798
		249.14	0.0114027
		249.28	0.0115263
		249.42	0.0116507
		249.56	0.0117757
		249.7	0.0119013
		249.84	0.0120276
		249.98	0.0121545
		250.12	0.012282
		250.26	0.0124101
		250.4	0.0125388
		250.54	0.012668
		250.68	0.0127978
		250.82	0.0129281
		250.96	0.0130588
		251.1	0.0131901
		251.24	0.0133218
		251.38	0.0134539
		251.52	0.0135865
		251.66	0.0137196
		251.8	0.013853
		251.94	0.0139868
		252.08	0.0141211
		252.22	0.0142558
		252.36	0.0143908
		252.5	0.0145263
		252.64	0.0146622
		252.78	0.0147984
		252.92	0.0149351
		253.06	0.0150722
		253.2	0.0152098
		253.34	0.0153478
		253.48	0.0154862
		253.62	0.0156251
		253.76	0.0157644
		253.9	0.0159042
		254.04	0.0160445
		254.18	0.0161853
		254.32	0.0163266
		254.46	0.0164683
		254.6	0.0166106
		254.74	0.0167533
		254.88	0.0168965
		255.02	0.0170402
		255.16	0.0171843
		255.3	0.0173288
		255.44	0.0174738
		255.58	0.0176191
		255.72	0.0177647
		255.86	0.0179106
		256	0.0180567
		256.14	0.018203
		256.28	0.0183494
		256.42	0.0184958
		256.56	0.0186421
		256.7	0.0187884
		256.84	0.0189344
		256.98	0.0190801
		257.12	0.0192254
		257.26	0.0193701
		257.4	0.0195142
		257.54	0.0196575
		257.68	0.0197999
		257.82	0.0199413
		257.96	0.0200816
		258.1	0.0202205
		258.24	0.0203581
		258.38	0.020494
		258.52	0.0206282
		258.66	0.0207606
		258.8	0.0208909
		258.94	0.0210191
		259.08	0.0211449
		259.22	0.0212682
		259.36	0.021389
		259.5	0.0215069
		259.64	0.0216219
		259.78	0.0217339
		259.92	0.0218426
		260.06	0.021948
		260.2	0.0220499
		260.34	0.0221481
		260.48	0.0222426
		260.62	0.0223332
		260.76	0.0224197
		260.9	0.0225021
		261.04	0.0225803
		261.18	0.022654
		261.32	0.0227233
		261.46	0.022788
		261.6	0.022848
		261.74	0.0229032
		261.88	0.0229535
		262.02	0.0229989
		262.16	0.0230393
		262.3	0.0230745
		262.44	0.0231046
		262.58	0.0231295
		262.72	0.0231491
		262.86	0.0231634
		263	0.0231723
		263.14	0.0231758
		263.28	0.0231739
		263.42	0.0231665
		263.56	0.0231537
		263.7	0.0231354
		263.84	0.0231116
		263.98	0.0230824
		264.12	0.0230477
		264.26	0.0230076
		264.4	0.022962
		264.54	0.022911
		264.68	0.0228547
		264.82	0.0227931
		264.96	0.0227263
		265.1	0.0226542
		265.24	0.022577
		265.38	0.0224947
		265.52	0.0224075
		265.66	0.0223153
		265.8	0.0222183
		265.94	0.0221165
		266.08	0.0220102
		266.22	0.0218993
		266.36	0.0217839
		266.5	0.0216643
		266.64	0.0215404
		266.78	0.0214125
		266.92	0.0212806
		267.06	0.0211449
		267.2	0.0210054
		267.34	0.0208624
		267.48	0.020716
		267.62	0.0205662
		267.76	0.0204133
		267.9	0.0202573
		268.04	0.0200985
		268.18	0.0199369
		268.32	0.0197727
		268.46	0.019606
		268.6	0.0194369
		268.74	0.0192656
		268.88	0.0190923
		269.02	0.018917
		269.16	0.0187399
		269.3	0.0185611
		269.44	0.0183808
		269.58	0.018199
		269.72	0.0180159
		269.86	0.0178316
		270	0.0176462
		270.14	0.0174598
		270.28	0.0172726
		270.42	0.0170846
		270.56	0.0168959
		270.7	0.0167067
		270.84	0.0165171
		270.98	0.016327
		271.12	0.0161367
		271.26	0.0159461
		271.4	0.0157555
		271.54	0.0155648
		271.68	0.0153742
		271.82	0.0151837
		271.96	0.0149933
		272.1	0.0148033
		272.24	0.0146135
		272.38	0.0144242
		272.52	0.0142353
		272.66	0.0140469
		272.8	0.0138592
		272.94	0.013672
		273.08	0.0134856
		273.22	0.0132999
		273.36	0.0131151
		273.5	0.0129311
		273.64	0.0127481
		273.78	0.012566
		273.92	0.0123851
		274.06	0.0122052
		274.2	0.0120264
		274.34	0.0118489
		274.48	0.0116727
		274.62	0.0114977
		274.76	0.0113242
		274.9	0.0111521
		275.04	0.0109815
		275.18	0.0108125
		275.32	0.010645
		275.46	0.0104793
		275.6	0.0103152
		275.74	0.010153
		275.88	0.00999252
		276.02	0.00983398
		276.16	0.0096774
		276.3	0.00952281
		276.44	0.00937028
		276.58	0.00921986
		276.72	0.00907161
		276.86	0.00892557
		277	0.00878179
		277.14	0.00864033
		277.28	0.00850122
		277.42	0.00836452
		277.56	0.00823026
		277.7	0.00809849
		277.84	0.00796926
		277.98	0.00784258
		278.12	0.00771849
		278.26	0.00759704
		278.4	0.00747824
		278.54	0.00736211
		278.68	0.00724869
		278.82	0.00713799
		278.96	0.00703002
		279.1	0.00692479
		279.24	0.00682232
		279.38	0.00672261
		279.52	0.00662566
		279.66	0.00653148
		279.8	0.00644004
		279.94	0.00635135
		280.08	0.00626539
		280.22	0.00618215
		280.36	0.00610161
		280.5	0.00602374
		280.64	0.00594853
		280.78	0.00587594
		280.92	0.00580593
		281.06	0.00573849
		281.2	0.00567357
		281.34	0.00561113
		281.48	0.00555113
		281.62	0.00549353
		281.76	0.00543828
		281.9	0.00538532
		282.04	0.00533463
		282.18	0.00528614
		282.32	0.00523981
		282.46	0.00519557
		282.6	0.00515339
		282.74	0.0051132
		282.88	0.00507494
		283.02	0.00503857
		283.16	0.00500402
		283.3	0.00497125
		283.44	0.0049402
		283.58	0.00491081
		283.72	0.00488303
		283.86	0.0048568
		284	0.00483208
		284.14	0.00480883
		284.28	0.00478697
		284.42	0.00476647
		284.56	0.00474729
		284.7	0.00472937
		284.84	0.00471267
		284.98	0.00469715
		285.12	0.00468279
		285.26	0.00466952
		285.4	0.00465732
		285.54	0.00464616
		285.68	0.00463601
		285.82	0.00462683
		285.96	0.0046186
		286.1	0.00461131
		286.24	0.00460492
		286.38	0.00459942
		286.52	0.00459479
		286.66	0.00459101
		286.8	0.00458808
		286.94	0.00458599
		287.08	0.00458472
		287.22	0.00458427
		287.36	0.00458464
		287.5	0.00458582
		287.64	0.00458783
		287.78	0.00459066
		287.92	0.00459431
		288.06	0.0045988
		288.2	0.00460412
		288.34	0.00461031
		288.48	0.00461736
		288.62	0.00462528
		288.76	0.00463409
		288.9	0.00464381
		289.04	0.00465446
		289.18	0.00466604
		289.32	0.00467858
		289.46	0.00469209
		289.6	0.00470659
		289.74	0.00472209
		289.88	0.00473862
		290.02	0.0047562
		290.16	0.00477483
		290.3	0.00479452
		290.44	0.00481531
		290.58	0.00483721
		290.72	0.00486021
		290.86	0.00488433
		291	0.00490957
		291.14	0.00493596
		291.28	0.00496348
		291.42	0.00499213
		291.56	0.00502192
		291.7	0.00505283
		291.84	0.00508486
		291.98	0.00511799
		292.12	0.00515222
		292.26	0.00518751
		292.4	0.00522386
		292.54	0.00526122
		292.68	0.00529957
		292.82	0.00533888
		292.96	0.0053791
		293.1	0.0054202
		293.24	0.00546212
		293.38	0.00550482
		293.52	0.00554824
		293.66	0.00559233
		293.8	0.00563702
		293.94	0.00568226
		294.08	0.00572796
		294.22	0.00577406
		294.36	0.00582049
		294.5	0.00586717
		294.64	0.00591403
		294.78	0.00596099
		294.92	0.00600796
		295.06	0.00605487
		295.2	0.00610163
		295.34	0.00614817
		295.48	0.0061944
		295.62	0.00624025
		295.76	0.00628562
		295.9	0.00633045
		296.04	0.00637465
		296.18	0.00641816
		296.32	0.00646089
		296.46	0.0065028
		296.6	0.0065438
		296.74	0.00658383
		296.88	0.00662284
		297.02	0.00666077
		297.16	0.00669758
		297.3	0.00673322
		297.44	0.00676765
		297.58	0.00680084
		297.72	0.00683276
		297.86	0.00686338
		298	0.00689269
		298.14	0.00692066
		298.28	0.0069473
		298.42	0.00697259
		298.56	0.00699655
		298.7	0.00701917
		298.84	0.00704046
		298.98	0.00706045
		299.12	0.00707915
		299.26	0.00709659
		299.4	0.0071128
		299.54	0.0071278
		299.68	0.00714164
		299.82	0.00715436
		299.96	0.00716598
		300.1	0.00717657
		300.24	0.00718616
		300.38	0.0071948
		300.52	0.00720255
		300.66	0.00720945
		300.8	0.00721555
		300.94	0.0072209
		301.08	0.00722557
		301.22	0.0072296
		301.36	0.00723305
		301.5	0.00723596
		301.64	0.00723839
		301.78	0.00724039
		301.92	0.007242
		302.06	0.00724329
		302.2	0.00724428
		302.34	0.00724504
		302.48	0.0072456
		302.62	0.007246
		302.76	0.00724627
		302.9	0.00724647
		303.04	0.00724662
		303.18	0.00724675
		303.32	0.00724689
		303.46	0.00724707
		303.6	0.00724732
		303.74	0.00724766
		303.88	0.0072481
		304.02	0.00724867
		304.16	0.00724937
		304.3	0.00725023
		304.44	0.00725125
		304.58	0.00725243
		304.72	0.00725378
		304.86	0.00725529
		305	0.00725698
		305.14	0.00725884
		305.28	0.00726086
		305.42	0.00726303
		305.56	0.00726534
		305.7	0.00726779
		305.84	0.00727035
		305.98	0.007273
		306.12	0.00727574
		306.26	0.00727853
		306.4	0.00728136
		306.54	0.00728419
		306.68	0.007287
		306.82	0.00728976
		306.96	0.00729244
		307.1	0.00729502
		307.24	0.00729745
		307.38	0.0072997
		307.52	0.00730173
		307.66	0.00730351
		307.8	0.00730499
		307.94	0.00730614
		308.08	0.00730692
		308.22	0.00730729
		308.36	0.0073072
		308.5	0.00730662
		308.64	0.0073055
		308.78	0.0073038
		308.92	0.00730147
		309.06	0.00729848
		309.2	0.00729479
		309.34	0.00729035
		309.48	0.00728513
		309.62	0.00727909
		309.76	0.00727218
		309.9	0.00726438
		310.04	0.00725564
		310.18	0.00724595
		310.32	0.00723525
		310.46	0.00722353
		310.6	0.00721077
		310.74	0.00719692
		310.88	0.00718198
		311.02	0.00716593
		311.16	0.00714874
		311.3	0.0071304
		311.44	0.00711091
		311.58	0.00709025
		311.72	0.00706842
		311.86	0.00704542
		312	0.00702126
		312.14	0.00699592
		312.28	0.00696944
		312.42	0.0069418
		312.56	0.00691304
		312.7	0.00688316
		312.84	0.00685219
		312.98	0.00682016
		313.12	0.00678709
		313.26	0.00675302
		313.4	0.00671796
		313.54	0.00668197
		313.68	0.00664508
		313.82	0.00660732
		313.96	0.00656876
		314.1	0.00652942
		314.24	0.00648936
		314.38	0.00644863
		314.52	0.00640727
		314.66	0.00636534
		314.8	0.00632288
		314.94	0.00627996
		315.08	0.00623664
		315.22	0.00619296
		315.36	0.00614898
		315.5	0.00610476
		315.64	0.00606034
		315.78	0.0060158
		315.92	0.00597117
		316.06	0.00592652
		316.2	0.00588189
		316.34	0.00583735
		316.48	0.00579293
		316.62	0.00574869
		316.76	0.00570468
		316.9	0.00566094
		317.04	0.00561752
		317.18	0.00557445
		317.32	0.00553178
		317.46	0.00548954
		317.6	0.00544778
		317.74	0.00540652
		317.88	0.00536579
		318.02	0.00532562
		318.16	0.00528605
		318.3	0.00524708
		318.44	0.00520876
		318.58	0.00517109
		318.72	0.00513409
		318.86	0.00509778
		319	0.00506217
		319.14	0.00502727
		319.28	0.00499308
		319.42	0.00495961
		319.56	0.00492688
		319.7	0.00489488
		319.84	0.00486361
		319.98	0.00483307
		320.12	0.00480326
		320.26	0.00477418
		320.4	0.00474581
		320.54	0.00471816
		320.68	0.00469121
		320.82	0.00466496
		320.96	0.00463939
		321.1	0.0046145
		321.24	0.00459027
		321.38	0.0045667
		321.52	0.00454377
		321.66	0.00452146
		321.8	0.00449977
		321.94	0.00447868
		322.08	0.00445817
		322.22	0.00443824
		322.36	0.00441887
		322.5	0.00440004
		322.64	0.00438174
		322.78	0.00436396
		322.92	0.00434667
		323.06	0.00432988
		323.2	0.00431356
		323.34	0.0042977
		323.48	0.00428229
		323.62	0.00426732
		323.76	0.00425277
		323.9	0.00423863
		324.04	0.00422489
		324.18	0.00421154
		324.32	0.00419857
		324.46	0.00418596
		324.6	0.0041737
		324.74	0.0041618
		324.88	0.00415023
		325.02	0.00413898
		325.16	0.00412805
		325.3	0.00411743
		325.44	0.00410711
		325.58	0.00409708
		325.72	0.00408733
		325.86	0.00407786
		326	0.00406865
		326.14	0.00405971
		326.28	0.00405101
		326.42	0.00404256
		326.56	0.00403435
		326.7	0.00402637
		326.84	0.00401861
		326.98	0.00401108
		327.12	0.00400375
		327.26	0.00399662
		327.4	0.0039897
		327.54	0.00398296
		327.68	0.00397641
		327.82	0.00397003
		327.96	0.00396383
		328.1	0.00395779
		328.24	0.00395191
		328.38	0.00394618
		328.52	0.00394059
		328.66	0.00393514
		328.8	0.00392983
		328.94	0.00392463
		329.08	0.00391956
		329.22	0.00391459
		329.36	0.00390973
		329.5	0.00390496
		329.64	0.00390028
		329.78	0.00389569
		329.92	0.00389116
		330.06	0.0038867
		330.2	0.00388231
		330.34	0.00387797
		330.48	0.00387367
		330.62	0.00386941
		330.76	0.00386517
		330.9	0.00386096
		331.04	0.00385676
		331.18	0.00385258
		331.32	0.00384839
		331.46	0.00384419
		331.6	0.00383998
		331.74	0.00383574
		331.88	0.00383148
		332.02	0.00382717
		332.16	0.00382282
		332.3	0.00381842
		332.44	0.00381395
		332.58	0.00380942
		332.72	0.0038048
		332.86	0.00380011
		333	0.00379532
		333.14	0.00379044
		333.28	0.00378546
		333.42	0.00378036
		333.56	0.00377514
		333.7	0.0037698
		333.84	0.00376432
		333.98	0.00375872
		334.12	0.00375297
		334.26	0.00374707
		334.4	0.00374101
		334.54	0.0037348
		334.68	0.00372842
		334.82	0.00372186
		334.96	0.00371514
		335.1	0.00370823
		335.24	0.00370113
		335.38	0.00369384
		335.52	0.00368637
		335.66	0.0036787
		335.8	0.00367082
		335.94	0.00366275
		336.08	0.00365447
		336.22	0.00364599
		336.36	0.00363729
		336.5	0.00362839
		336.64	0.00361926
		336.78	0.00360993
		336.92	0.00360039
		337.06	0.00359063
		337.2	0.00358066
		337.34	0.00357048
		337.48	0.00356008
		337.62	0.00354948
		337.76	0.00353867
		337.9	0.00352765
		338.04	0.00351643
		338.18	0.00350501
		338.32	0.00349339
		338.46	0.00348158
		338.6	0.00346958
		338.74	0.00345739
		338.88	0.00344502
		339.02	0.00343248
		339.16	0.00341976
		339.3	0.00340688
		339.44	0.00339384
		339.58	0.00338065
		339.72	0.0033673
		339.86	0.00335382
		340	0.0033402
		340.14	0.00332646
		340.28	0.00331259
		340.42	0.00329861
		340.56	0.00328452
		340.7	0.00327033
		340.84	0.00325604
		340.98	0.00324167
		341.12	0.00322723
		341.26	0.00321271
		341.4	0.00319812
		341.54	0.00318348
		341.68	0.00316879
		341.82	0.00315406
		341.96	0.00313929
		342.1	0.00312448
		342.24	0.00310966
		342.38	0.00309482
		342.52	0.00307996
		342.66	0.00306509
		342.8	0.00305023
		342.94	0.00303537
		343.08	0.00302052
		343.22	0.00300568
		343.36	0.00299086
		343.5	0.00297606
		343.64	0.00296129
		343.78	0.00294655
		343.92	0.00293183
		344.06	0.00291715
		344.2	0.0029025
		344.34	0.00288789
		344.48	0.00287332
		344.62	0.00285879
		344.76	0.00284431
		344.9	0.00282985
		345.04	0.00281545
		345.18	0.00280108
		345.32	0.00278676
		345.46	0.00277247
		345.6	0.00275822
		345.74	0.002744
		345.88	0.00272983
		346.02	0.00271569
		346.16	0.00270157
		346.3	0.00268749
		346.44	0.00267344
		346.58	0.0026594
		346.72	0.00264539
		346.86	0.0026314
		347	0.00261743
		347.14	0.00260347
		347.28	0.00258952
		347.42	0.00257558
		347.56	0.00256165
		347.7	0.00254772
		347.84	0.00253378
		347.98	0.00251985
		348.12	0.00250591
		348.26	0.00249196
		348.4	0.00247801
		348.54	0.00246404
		348.68	0.00245006
		348.82	0.00243606
		348.96	0.00242205
		349.1	0.00240801
		349.24	0.00239396
		349.38	0.00237989
		349.52	0.0023658
		349.66	0.00235168
		349.8	0.00233755
		349.94	0.00232339
		350.08	0.00230922
		350.22	0.00229502
		350.36	0.0022808
		350.5	0.00226657
		350.64	0.00225231
		350.78	0.00223804
		350.92	0.00222376
		351.06	0.00220947
		351.2	0.00219516
		351.34	0.00218085
		351.48	0.00216653
		351.62	0.00215221
		351.76	0.0021379
		351.9	0.00212358
		352.04	0.00210927
		352.18	0.00209497
		352.32	0.00208068
		352.46	0.00206641
		352.6	0.00205216
		352.74	0.00203794
		352.88	0.00202374
		353.02	0.00200956
		353.16	0.00199543
		353.3	0.00198132
		353.44	0.00196726
		353.58	0.00195324
		353.72	0.00193927
		353.86	0.00192534
		354	0.00191147
		354.14	0.00189765
		354.28	0.0018839
		354.42	0.0018702
		354.56	0.00185656
		354.7	0.00184299
		354.84	0.00182949
		354.98	0.00181605
		355.12	0.00180269
		355.26	0.0017894
		355.4	0.00177618
		355.54	0.00176304
		355.68	0.00174997
		355.82	0.00173698
		355.96	0.00172406
		356.1	0.00171123
		356.24	0.00169847
		356.38	0.00168579
		356.52	0.00167319
		356.66	0.00166066
		356.8	0.00164821
		356.94	0.00163583
		357.08	0.00162353
		357.22	0.00161131
		357.36	0.00159916
		357.5	0.00158708
		357.64	0.00157506
		357.78	0.00156312
		357.92	0.00155125
		358.06	0.00153944
		358.2	0.0015277
		358.34	0.00151601
		358.48	0.00150439
		358.62	0.00149282
		358.76	0.00148131
		358.9	0.00146986
		359.04	0.00145845
		359.18	0.0014471
		359.32	0.00143579
		359.46	0.00142453
		359.6	0.00141331
		359.74	0.00140214
		359.88	0.00139101
		360.02	0.00137991
		360.16	0.00136886
		360.3	0.00135783
		360.44	0.00134685
		360.58	0.00133589
		360.72	0.00132497
		360.86	0.00131408
		361	0.00130322
		361.14	0.00129238
		361.28	0.00128158
		361.42	0.0012708
		361.56	0.00126004
		361.7	0.00124932
		361.84	0.00123862
		361.98	0.00122794
		362.12	0.00121729
		362.26	0.00120667
		362.4	0.00119607
		362.54	0.0011855
		362.68	0.00117495
		362.82	0.00116443
		362.96	0.00115394
		363.1	0.00114348
		363.24	0.00113305
		363.38	0.00112265
		363.52	0.00111229
		363.66	0.00110195
		363.8	0.00109165
		363.94	0.00108139
		364.08	0.00107116
		364.22	0.00106097
		364.36	0.00105083
		364.5	0.00104072
		364.64	0.00103065
		364.78	0.00102064
		364.92	0.00101066
		365.06	0.00100074
		365.2	0.000990863
		365.34	0.00098104
		365.48	0.00097127
		365.62	0.000961551
		365.76	0.000951891
		365.9	0.000942289
		366.04	0.000932746
		366.18	0.000923263
		366.32	0.000913842
		366.46	0.000904481
		366.6	0.000895188
		366.74	0.000885959
		366.88	0.000876799
		367.02	0.000867708
		367.16	0.000858686
		367.3	0.000849734
		367.44	0.000840854
		367.58	0.000832045
		367.72	0.00082331
		367.86	0.000814645
		368	0.000806058
		368.14	0.000797545
		368.28	0.000789108
		368.42	0.000780747
		368.56	0.000772462
		368.7	0.000764253
		368.84	0.000756121
		368.98	0.000748066
		369.12	0.000740087
		369.26	0.00073218
		369.4	0.000724357
		369.54	0.00071661
		369.68	0.00070894
		369.82	0.000701347
		369.96	0.00069383
		370.1	0.00068639
		370.24	0.000679026
		370.38	0.000671738
		370.52	0.000664526
		370.66	0.000657391
		370.8	0.00065033
		370.94	0.000643342
		371.08	0.00063643
		371.22	0.000629591
		371.36	0.000622824
		371.5	0.000616133
		371.64	0.000609515
		371.78	0.000602971
		371.92	0.000596499
		372.06	0.000590099
		372.2	0.000583772
		372.34	0.000577517
		372.48	0.000571334
		372.62	0.000565223
		372.76	0.000559184
		372.9	0.000553216
		373.04	0.00054732
		373.18	0.000541495
		373.32	0.000535742
		373.46	0.000530057
		373.6	0.000524448
		373.74	0.00051891
		373.88	0.000513444
		374.02	0.000508047
		374.16	0.000502725
		374.3	0.000497476
		374.44	0.000492299
		374.58	0.000487195
		374.72	0.000482163
		374.86	0.000477204
		375	0.000472319
		375.14	0.000467507
		375.28	0.000462768
		375.42	0.000458104
		375.56	0.000453513
		375.7	0.000448996
		375.84	0.000444553
		375.98	0.000440185
		376.12	0.00043589
		376.26	0.00043167
		376.4	0.000427524
		376.54	0.000423452
		376.68	0.000419454
		376.82	0.000415529
		376.96	0.000411678
		377.1	0.0004079
		377.24	0.000404194
		377.38	0.000400561
		377.52	0.000396999
		377.66	0.000393509
		377.8	0.000390088
		377.94	0.000386737
		378.08	0.000383454
		378.22	0.000380239
		378.36	0.000377091
		378.5	0.000374008
		378.64	0.000370989
		378.78	0.000368032
		378.92	0.000365138
		379.06	0.0003623
		379.2	0.000359523
		379.34	0.000356803
		379.48	0.000354137
		379.62	0.000351525
		379.76	0.000348964
		379.9	0.000346451
		380.04	0.000343986
		380.18	0.000341565
		380.32	0.000339184
		380.46	0.000336846
		380.6	0.000334544
		380.74	0.000332279
		380.88	0.000330048
		381.02	0.000327848
		381.16	0.000325675
		381.3	0.000323528
		381.44	0.000321404
		381.58	0.0003193
		381.72	0.000317214
		381.86	0.000315143
		382	0.000313084
		382.14	0.000311035
		382.28	0.000308994
		382.42	0.000306957
		382.56	0.00030492
		382.7	0.000302885
		382.84	0.000300847
		382.98	0.000298804
		383.12	0.000296753
		383.26	0.000294692
		383.4	0.000292619
		383.54	0.000290529
		383.68	0.000288425
		383.82	0.000286302
		383.96	0.000284159
		384.1	0.000281994
		384.24	0.000279804
		384.38	0.000277589
		384.52	0.000275347
		384.66	0.000273075
		384.8	0.000270774
		384.94	0.000268442
		385.08	0.000266077
		385.22	0.000263679
		385.36	0.000261247
		385.5	0.00025878
		385.64	0.000256278
		385.78	0.00025374
		385.92	0.000251166
		386.06	0.000248555
		386.2	0.000245909
		386.34	0.000243229
		386.48	0.00024051
		386.62	0.000237755
		386.76	0.000234965
		386.9	0.00023214
		387.04	0.000229281
		387.18	0.000226389
		387.32	0.000223461
		387.46	0.000220505
		387.6	0.000217519
		387.74	0.000214503
		387.88	0.00021146
		388.02	0.000208388
		388.16	0.000205294
		388.3	0.000202177
		388.44	0.000199038
		388.58	0.000195879
		388.72	0.000192702
		388.86	0.000189509
		389	0.000186301
		389.14	0.000183082
		389.28	0.000179852
		389.42	0.000176611
		389.56	0.000173367
		389.7	0.000170119
		389.84	0.000166869
		389.98	0.000163619
		390.12	0.000160372
		390.26	0.000157129
		390.4	0.000153894
		390.54	0.000150664
		390.68	0.000147448
		390.82	0.000144246
		390.96	0.000141056
		391.1	0.000137887
		391.24	0.000134738
		391.38	0.000131607
		391.52	0.000128503
		391.66	0.000125421
		391.8	0.00012237
		391.94	0.000119348
		392.08	0.000116357
		392.22	0.000113402
		392.36	0.000110476
		392.5	0.000107589
		392.64	0.00010474
		392.78	0.00010193
		392.92	9.91605e-05
		393.06	9.64331e-05
		393.2	9.37488e-05
		393.34	9.11091e-05
		393.48	8.85149e-05
		393.62	8.59674e-05
		393.76	8.34675e-05
		393.9	8.10162e-05
		394.04	7.86143e-05
		394.18	7.62626e-05
		394.32	7.39617e-05
		394.46	7.17122e-05
		394.6	6.95148e-05
		394.74	6.73698e-05
		394.88	6.52776e-05
		395.02	6.32387e-05
		395.16	6.12504e-05
		395.3	5.93187e-05
		395.44	5.74408e-05
		395.58	5.56167e-05
		395.72	5.38465e-05
		395.86	5.213e-05
		396	5.04672e-05
		396.14	4.88578e-05
		396.28	4.73018e-05
		396.42	4.57987e-05
		396.56	4.43483e-05
		396.7	4.29503e-05
		396.84	4.16042e-05
		396.98	4.03095e-05
		397.12	3.90659e-05
		397.26	3.78728e-05
		397.4	3.67296e-05
		397.54	3.56358e-05
		397.68	3.45908e-05
		397.82	3.35939e-05
		397.96	3.26445e-05
		398.1	3.17391e-05
		398.24	3.08829e-05
		398.38	3.00721e-05
		398.52	2.93061e-05
		398.66	2.85841e-05
		398.8	2.79054e-05
		398.94	2.72693e-05
		399.08	2.66749e-05
		399.22	2.61217e-05
		399.36	2.56089e-05
		399.5	2.51356e-05
		399.64	2.47013e-05
		399.78	2.43052e-05
		399.92	2.39465e-05
		400.06	2.36246e-05
		400.2	2.33388e-05
		400.34	2.30884e-05
		400.48	2.28728e-05
		400.62	2.26912e-05
		400.76	2.25431e-05
		400.9	2.24279e-05
		401.04	2.23449e-05
		401.18	2.22935e-05
		401.32	2.22733e-05
		401.46	2.22837e-05
		401.6	2.23213e-05
		401.74	2.23916e-05
		401.88	2.2491e-05
		402.02	2.26191e-05
		402.16	2.27754e-05
		402.3	2.29595e-05
		402.44	2.31711e-05
		402.58	2.34099e-05
		402.72	2.36754e-05
		402.86	2.39675e-05
		403	2.42858e-05
		403.14	2.46301e-05
		403.28	2.50003e-05
		403.42	2.5396e-05
		403.56	2.58172e-05
		403.7	2.62637e-05
		403.84	2.67355e-05
		403.98	2.72323e-05
		404.12	2.77542e-05
		404.26	2.83011e-05
		404.4	2.8873e-05
		404.54	2.94699e-05
		404.68	3.00918e-05
		404.82	3.07389e-05
		404.96	3.14112e-05
		405.1	3.21087e-05
		405.24	3.28317e-05
		405.38	3.35802e-05
		405.52	3.43545e-05
		405.66	3.51547e-05
		405.8	3.5981e-05
		405.94	3.68337e-05
		406.08	3.7713e-05
		406.22	3.86192e-05
		406.36	3.95525e-05
		406.5	4.05133e-05
		406.64	4.15019e-05
		406.78	4.25186e-05
		406.92	4.35637e-05
		407.06	4.46376e-05
		407.2	4.57407e-05
		407.34	4.68734e-05
		407.48	4.8036e-05
		407.62	4.9229e-05
		407.76	5.04527e-05
		407.9	5.17077e-05
		408.04	5.29943e-05
		408.18	5.4313e-05
		408.32	5.56642e-05
		408.46	5.70483e-05
		408.6	5.84659e-05
		408.74	5.99173e-05
		408.88	6.14031e-05
		409.02	6.29236e-05
		409.16	6.44794e-05
		409.3	6.60709e-05
		409.44	6.76957e-05
		409.58	6.93601e-05
		409.72	7.10616e-05
		409.86	7.28005e-05
		410	7.45773e-05
		410.14	7.63923e-05
		410.28	7.82461e-05
		410.42	8.0139e-05
		410.56	8.20714e-05
		410.7	8.40436e-05
		410.84	8.60561e-05
		410.98	8.81091e-05
		411.12	9.02029e-05
		411.26	9.23379e-05
		411.4	9.45144e-05
		411.54	9.67325e-05
		411.68	9.89925e-05
		411.82	0.000101295
		411.96	0.000103639
		412.1	0.000106026
		412.24	0.000108455
		412.38	0.000110927
		412.52	0.000113442
		412.66	0.000115999
		412.8	0.000118599
		412.94	0.000121242
		413.08	0.000123927
		413.22	0.000126654
		413.36	0.000129424
		413.5	0.000132235
		413.64	0.000135088
		413.78	0.000137983
		413.92	0.000140919
		414.06	0.000143895
		414.2	0.000146911
		414.34	0.000149967
		414.48	0.000153059
		414.62	0.000156193
		414.76	0.000159364
		414.9	0.000162573
		415.04	0.000165818
		415.18	0.000169098
		415.32	0.000172413
		415.46	0.000175762
		415.6	0.000179143
		415.74	0.000182556
		415.88	0.000185999
		416.02	0.000189472
		416.16	0.000192972
		416.3	0.0001965
		416.44	0.00020005
		416.58	0.000203627
		416.72	0.000207227
		416.86	0.000210848
		417	0.000214488
		417.14	0.000218146
		417.28	0.000221821
		417.42	0.00022551
		417.56	0.000229212
		417.7	0.000232924
		417.84	0.000236646
		417.98	0.000240375
		418.12	0.000244109
		418.26	0.000247845
		418.4	0.00025158
		418.54	0.000255317
		418.68	0.00025905
		418.82	0.000262778
		418.96	0.000266498
		419.1	0.000270208
		419.24	0.000273906
		419.38	0.000277589
		419.52	0.000281255
		419.66	0.000284901
		419.8	0.000288526
		419.94	0.000292126
		420.08	0.0002957
		420.22	0.000299245
		420.36	0.000302758
		420.5	0.000306236
		420.64	0.000309678
		420.78	0.000313081
		420.92	0.000316443
		421.06	0.00031976
		421.2	0.000323031
		421.34	0.000326253
		421.48	0.000329423
		421.62	0.000332539
		421.76	0.0003356
		421.9	0.000338601
		422.04	0.000341541
		422.18	0.000344418
		422.32	0.00034723
		422.46	0.000349973
		422.6	0.000352646
		422.74	0.000355247
		422.88	0.000357774
		423.02	0.000360224
		423.16	0.000362596
		423.3	0.000364887
		423.44	0.000367096
		423.58	0.00036922
		423.72	0.000371259
		423.86	0.000373209
		424	0.000375071
		424.14	0.000376842
		424.28	0.00037852
		424.42	0.000380105
		424.56	0.000381594
		424.7	0.000382987
		424.84	0.000384283
		424.98	0.00038548
		425.12	0.000386578
		425.26	0.000387575
		425.4	0.000388471
		425.54	0.000389264
		425.68	0.000389956
		425.82	0.000390544
		425.96	0.000391028
		426.1	0.000391409
		426.24	0.000391685
		426.38	0.000391857
		426.52	0.000391925
		426.66	0.000391888
		426.8	0.000391747
		426.94	0.000391502
		427.08	0.000391154
		427.22	0.000390702
		427.36	0.000390147
		427.5	0.00038949
		427.64	0.000388732
		427.78	0.000387873
		427.92	0.000386914
		428.06	0.000385856
		428.2	0.0003847
		428.34	0.000383448
		428.48	0.000382099
		428.62	0.000380657
		428.76	0.000379122
		428.9	0.000377495
		429.04	0.000375778
		429.18	0.000373972
		429.32	0.00037208
		429.46	0.000370103
		429.6	0.000368042
		429.74	0.0003659
		429.88	0.000363678
		430.02	0.000361378
		430.16	0.000359002
		430.3	0.000356553
		430.44	0.000354032
		430.58	0.000351441
		430.72	0.000348783
		430.86	0.000346059
		431	0.000343272
		431.14	0.000340425
		431.28	0.000337519
		431.42	0.000334556
		431.56	0.00033154
		431.7	0.000328472
		431.84	0.000325354
		431.98	0.00032219
		432.12	0.00031898
		432.26	0.000315729
		432.4	0.000312437
		432.54	0.000309108
		432.68	0.000305743
		432.82	0.000302346
		432.96	0.000298917
		433.1	0.000295461
		433.24	0.000291978
		433.38	0.000288471
		433.52	0.000284943
		433.66	0.000281396
		433.8	0.000277831
		433.94	0.000274252
		434.08	0.00027066
		434.22	0.000267057
		434.36	0.000263445
		434.5	0.000259827
		434.64	0.000256204
		434.78	0.000252579
		434.92	0.000248953
		435.06	0.000245328
		435.2	0.000241707
		435.34	0.00023809
		435.48	0.00023448
		435.62	0.000230878
		435.76	0.000227287
		435.9	0.000223706
		436.04	0.00022014
		436.18	0.000216588
		436.32	0.000213052
		436.46	0.000209533
		436.6	0.000206034
		436.74	0.000202555
		436.88	0.000199098
		437.02	0.000195663
		437.16	0.000192253
		437.3	0.000188867
		437.44	0.000185508
		437.58	0.000182176
		437.72	0.000178873
		437.86	0.000175598
		438	0.000172353
		438.14	0.00016914
		438.28	0.000165958
		438.42	0.000162808
		438.56	0.000159691
		438.7	0.000156608
		438.84	0.000153559
		438.98	0.000150545
		439.12	0.000147567
		439.26	0.000144624
		439.4	0.000141718
		439.54	0.000138848
		439.68	0.000136015
		439.82	0.000133219
		439.96	0.000130461
		440.1	0.000127741
		440.24	0.000125059
		440.38	0.000122415
		440.52	0.00011981
		440.66	0.000117242
		440.8	0.000114714
		440.94	0.000112223
		441.08	0.000109772
		441.22	0.000107359
		441.36	0.000104984
		441.5	0.000102648
		441.64	0.00010035
		441.78	9.80897e-05
		441.92	9.58679e-05
		442.06	9.3684e-05
		442.2	9.15378e-05
		442.34	8.94291e-05
		442.48	8.73577e-05
		442.62	8.53233e-05
		442.76	8.33257e-05
		442.9	8.13645e-05
		443.04	7.94396e-05
		443.18	7.75505e-05
		443.32	7.56971e-05
		443.46	7.38789e-05
		443.6	7.20956e-05
		443.74	7.03469e-05
		443.88	6.86324e-05
		444.02	6.69517e-05
		444.16	6.53045e-05
		444.3	6.36904e-05
		444.44	6.21089e-05
		444.58	6.05597e-05
		444.72	5.90423e-05
		444.86	5.75564e-05
		445	5.61016e-05
		445.14	5.46773e-05
		445.28	5.32833e-05
		445.42	5.1919e-05
		445.56	5.0584e-05
		445.7	4.9278e-05
		445.84	4.80004e-05
		445.98	4.67508e-05
		446.12	4.55289e-05
		446.26	4.43341e-05
		446.4	4.3166e-05
		446.54	4.20242e-05
		446.68	4.09083e-05
		446.82	3.98177e-05
		446.96	3.87522e-05
		447.1	3.77113e-05
		447.24	3.66944e-05
		447.38	3.57013e-05
		447.52	3.47315e-05
		447.66	3.37845e-05
		447.8	3.286e-05
		447.94	3.19575e-05
		448.08	3.10766e-05
		448.22	3.02169e-05
		448.36	2.9378e-05
		448.5	2.85595e-05
		448.64	2.77611e-05
		448.78	2.69822e-05
		448.92	2.62226e-05
		449.06	2.54819e-05
		449.2	2.47596e-05
		449.34	2.40553e-05
		449.48	2.33688e-05
		449.62	2.26997e-05
		449.76	2.20475e-05
		449.9	2.1412e-05
		450.04	2.07928e-05
		450.18	2.01895e-05
		450.32	1.96018e-05
		450.46	1.90294e-05
		450.6	1.84719e-05
		450.74	1.7929e-05
		450.88	1.74003e-05
		451.02	1.68857e-05
		451.16	1.63847e-05
		451.3	1.5897e-05
		451.44	1.54224e-05
		451.58	1.49605e-05
		451.72	1.45111e-05
		451.86	1.40738e-05
		452	1.36484e-05
		452.14	1.32346e-05
		452.28	1.28322e-05
		452.42	1.24408e-05
		452.56	1.20602e-05
		452.7	1.16902e-05
		452.84	1.13305e-05
		452.98	1.09808e-05
		453.12	1.06409e-05
		453.26	1.03105e-05
		453.4	9.98952e-06
		453.54	9.6776e-06
		453.68	9.37455e-06
		453.82	9.08016e-06
		453.96	8.79419e-06
		454.1	8.51644e-06
		454.24	8.24671e-06
		454.38	7.98478e-06
		454.52	7.73047e-06
		454.66	7.48356e-06
		454.8	7.24388e-06
		454.94	7.01123e-06
		455.08	6.78543e-06
		455.22	6.5663e-06
		455.36	6.35367e-06
		455.5	6.14737e-06
		455.64	5.94722e-06
		455.78	5.75306e-06
		455.92	5.56473e-06
		456.06	5.38209e-06
		456.2	5.20496e-06
		456.34	5.0332e-06
		456.48	4.86667e-06
		456.62	4.70523e-06
		456.76	4.54872e-06
		456.9	4.39702e-06
		457.04	4.25e-06
		457.18	4.10752e-06
		457.32	3.96946e-06
		457.46	3.83569e-06
		457.6	3.70609e-06
		457.74	3.58054e-06
		457.88	3.45894e-06
		458.02	3.34116e-06
		458.16	3.2271e-06
		458.3	3.11665e-06
		458.44	3.0097e-06
		458.58	2.90616e-06
		458.72	2.80593e-06
		458.86	2.70891e-06
		459	2.615e-06
		459.14	2.52412e-06
		459.28	2.43617e-06
		459.42	2.35107e-06
		459.56	2.26874e-06
		459.7	2.1863e-06
		459.84	2.10949e-06
		459.98	2.03519e-06
		460.12	1.96332e-06
		460.26	1.8938e-06
		460.4	1.82657e-06
		460.54	1.76156e-06
		460.68	1.6987e-06
		460.82	1.63793e-06
		460.96	1.57918e-06
		461.1	1.52239e-06
		461.24	1.4675e-06
		461.38	1.41445e-06
		461.52	1.36319e-06
		461.66	1.31366e-06
		461.8	1.26581e-06
		461.94	1.21959e-06
		462.08	1.17493e-06
		462.22	1.13181e-06
		462.36	1.09015e-06
		462.5	1.04993e-06
		462.64	1.0111e-06
		462.78	9.73603e-07
		462.92	9.37406e-07
		463.06	9.02466e-07
		463.2	8.68742e-07
		463.34	8.36196e-07
		463.48	8.04789e-07
		463.62	7.74485e-07
		463.76	7.45247e-07
		463.9	7.17041e-07
		464.04	6.89833e-07
		464.18	6.63591e-07
		464.32	6.38282e-07
		464.46	6.13876e-07
		464.6	5.90344e-07
		464.74	5.67655e-07
		464.88	5.45783e-07
		465.02	5.24699e-07
		465.16	5.04378e-07
		465.3	4.84794e-07
		465.44	4.65922e-07
		465.58	4.47738e-07
		465.72	4.30218e-07
		465.86	4.13341e-07
		466	3.97084e-07
		466.14	3.81426e-07
		466.28	3.66347e-07
		466.42	3.51826e-07
		466.56	3.37845e-07
		466.7	3.24385e-07
		466.84	3.11428e-07
		466.98	2.98956e-07
		467.12	2.86952e-07
		467.26	2.75401e-07
		467.4	2.64285e-07
		467.54	2.53591e-07
		467.68	2.43303e-07
		467.82	2.33406e-07
		467.96	2.23887e-07
		468.1	2.14733e-07
		468.24	2.0593e-07
		468.38	1.97466e-07
		468.52	1.89329e-07
		468.66	1.81506e-07
		468.8	1.73987e-07
		468.94	1.66761e-07
		469.08	1.59817e-07
		469.22	1.53145e-07
		469.36	1.46734e-07
		469.5	1.40576e-07
		469.64	1.3466e-07
		469.78	1.28979e-07
		469.92	1.23523e-07
		470.06	1.18285e-07
		470.2	1.10292e-07
		470.34	1.05668e-07
		470.48	1.01224e-07
		470.62	9.69537e-08
		470.76	9.28513e-08
		470.9	8.89105e-08
		471.04	8.51255e-08
		471.18	8.14907e-08
		471.32	7.80006e-08
		471.46	7.46499e-08
		471.6	7.14336e-08
		471.74	6.83466e-08
		471.88	6.53842e-08
		472.02	6.25418e-08
		472.16	5.9815e-08
		472.3	5.71993e-08
		472.44	5.46907e-08
		472.58	5.2285e-08
		472.72	4.99784e-08
		472.86	4.77672e-08
		473	4.56476e-08
		473.14	4.36163e-08
		473.28	4.16697e-08
		473.42	3.98047e-08
		473.56	3.8018e-08
		473.7	3.63066e-08
		473.84	3.46676e-08
		473.98	3.30981e-08
		474.12	3.15954e-08
		474.26	3.01569e-08
		474.4	2.87801e-08
		474.54	2.74623e-08
		474.68	2.62014e-08
		474.82	2.49951e-08
		474.96	2.3841e-08
		475.1	2.27372e-08
		475.24	2.16816e-08
		475.38	2.06722e-08
		475.52	1.97071e-08
		475.66	1.87846e-08
		475.8	1.79028e-08
		475.94	1.70602e-08
		476.08	1.6255e-08
		476.22	1.54857e-08
		476.36	1.47509e-08
		476.5	1.4049e-08
		476.64	1.33788e-08
		476.78	1.27387e-08
		476.92	1.21277e-08
		477.06	1.15445e-08
		477.2	1.09878e-08
		477.34	1.04565e-08
		477.48	9.9496e-09
		477.62	9.466e-09
		477.76	9.00468e-09
		477.9	8.5647e-09
		478.04	8.14512e-09
		478.18	7.74505e-09
		478.32	7.36364e-09
		478.46	7.00007e-09
		478.6	6.65356e-09
		478.74	6.32335e-09
		478.88	6.00872e-09
		479.02	5.70897e-09
		479.16	5.42345e-09
		479.3	5.15152e-09
		479.44	4.89256e-09
		479.58	4.646e-09
		479.72	4.41126e-09
		479.86	4.18783e-09
[truncated: 1 more rows]

## Sheet: U-Pb
Rosenbaum et al. (2020). Australian Journal of Earth Sciences, 67, https://doi.org/10.1080/08120099.2019.1648317
Table S1. U–Pb analyses of detrital zircon grains
	Ratio					Age (Ma)
Sample #	Pb207/Pb235	2s.e.	Pb206/U238	2s.e.	Error correl.	Pb207/Pb206	2s.e.	Pb206/U238	2s.e.	Pb208/U232	2s.e.	Pb208/U235	2s.e.	Th (ppm)	U (ppm)	Th/U	P (ppm)	Ca (ppm)	Ti (ppm)	La (ppm)
GI22_1	0.26	0.11	0.0431	0.0035	0.079634	-430	610	272	22	261	47	202	80	33	53.5	0.632775	200	0	15.1	Below LOD
GI22_2	2.13	0.19	0.1989	0.0055	0.53291	1118	200	1169	30	1138	84	1146	62	167.4	316	0.543447	247	0	5.7	0.005
GI22_3	0.31	0.049	0.0454	0.0018	0.23574	50	310	286.1	11	264	31	263	38	59.3	163.8	0.37139	181	0	2.86	0.0033
GI22_4	0.312	0.075	0.0414	0.0022	-0.1373	30	440	261	14	257	42	256	56	37.2	86.6	0.440671	351	0	5	2.43
GI22_5	0.3	0.039	0.0434	0.0014	0.14384	150	270	274.1	8.7	271	22	262	31	293.9	289	1.04326	323	0	10.3	0.013
GI22_6	0.312	0.04	0.0421	0.0016	0.077051	310	270	266	10	275	27	272	31	147.5	305	0.496114	846	0	4.1	128
GI22_7	0.359	0.097	0.0395	0.0027	0.14865	160	520	249	17	245	41	277	69	30.02	55.4	0.555891	247	0	8	0.005
GI22_8	0.291	0.042	0.0418	0.0014	-0.033453	100	280	264	8.8	241	27	252	32	88.7	183	0.497235	233	0	4.8	0.0072
GI22_9	0.287	0.039	0.0443	0.0015	0.16513	-10	260	279.3	9.4	268	26	250	30	80.7	214.1	0.386675	153	0	5.1	0.0006
GI22_10	0.293	0.039	0.0423	0.0016	-0.037448	130	290	266.7	9.8	262	27	256	31	140.7	256	0.563823	138	0	2.53	1.2
GI22_11	0.296	0.053	0.0444	0.002	0.1069	-40	330	280	12	275	32	250	41	42.2	103.1	0.419897	151	0	5	0.0072
GI22_12	0.346	0.068	0.0457	0.0021	0.1089	40	380	288	13	289	33	280	51	40.5	84.5	0.491685	257	0	6.5	Below LOD
GI22_13	0.325	0.055	0.0426	0.0017	0.09127	180	320	268.8	11	257	24	273	41	96.2	143.6	0.687242	348	0	15.9	0.015
GI22_14	0.306	0.043	0.0443	0.0016	0.17787	70	270	279.1	9.7	252	28	263	33	57.2	162	0.362218	104	0	6.5	0.0078
GI22_15	0.293	0.066	0.0426	0.0025	0.14799	-140	380	268	15	231	31	239	49	42.9	66.4	0.662793	295	0	14	0.55
GI22_16	0.326	0.036	0.0444	0.0016	0.27885	250	240	279.7	10	258	21	282	28	233	287	0.832843	380	0	9	0.055
GI22_17	0.331	0.061	0.0439	0.002	-0.057472	110	350	277	13	270	33	273	45	49.4	86.3	0.587226	251	0	15.7	0.009
GI22_18	0.318	0.047	0.0437	0.0016	0.1695	130	280	275.3	10	272	30	272	35	57.6	156.4	0.377811	138	0	3.8	0.007
GI22_19	0.342	0.043	0.0412	0.0014	0.11383	450	280	259.9	8.7	269	23	293	32	217	290	0.767628	1016	0	16.1	0.04
GI22_20	0.34	0.15	0.0476	0.0038	0.16194	-660	580	299	23	245	84	209	93	6.68	22.97	0.298335	233	0	11.1	Below LOD
GI22_21	0.307	0.045	0.0454	0.0017	0.14251	20	270	286.2	10	256	24	264	34	104	175.6	0.607572	210	0	5.9	Below LOD
GI22_22	0.294	0.076	0.0447	0.0024	-0.078674	-210	370	282	15	275	32	235	53	45.1	59.4	0.778895	187	0	13	0.004
GI22_23	0.32	0.042	0.0455	0.0018	-0.070105	110	270	286.7	11	288	31	275	32	62.4	188.1	0.340318	140	0	5	0.0049
GI22_24	0.288	0.081	0.045	0.0027	-0.03345	-370	450	283	17	282	38	223	61	33.1	50.3	0.67507	225	0	14.4	0.0038
GI22_25	0.317	0.048	0.0419	0.0015	0.0086128	180	300	264.4	9.4	259	25	270	36	90.9	171.8	0.542787	66	0	3.9	0.101
GI22_26	0.337	0.054	0.0439	0.002	0.20475	260	300	277	12	278	27	288	39	108.4	192.2	0.578582	196	0	5.1	0.026
GI22_27	0.301	0.093	0.0385	0.0029	0.20227	160	590	244	18	209	34	253	71	73.2	103.3	0.726942	294	0	9	Below LOD
GI22_28	0.288	0.072	0.0424	0.0024	0.1298	-210	410	267	15	261	49	232	55	15.24	50	0.312683	287	0	6.4	0.033
GI22_29	0.374	0.081	0.0448	0.0023	0.025544	140	380	282	14	299	41	296	56	36.1	66.4	0.557735	202	0	7.8	0.13
GI22_30	0.28	0.14	0.043	0.0033	-0.067869	-790	610	271	20	224	59	162	94	11.23	23.01	0.500671	119	0	12.8	Below LOD
GI22_31	0.321	0.038	0.0438	0.0018	0.2146	220	270	276.2	11	273	25	280	29	188.9	370	0.523744	300	0	4.5	Below LOD
GI22_32	0.331	0.036	0.0437	0.0014	-0.10208	290	250	275.7	8.6	271	26	287	27	79.2	294	0.276355	183	0	6.1	0.0007
GI22_33	0.325	0.05	0.0432	0.0017	0.2129	140	310	272.6	10	257	27	275	38	73.1	154.7	0.484748	210	0	5.5	Below LOD
GI22_34	0.384	0.062	0.0425	0.0019	0.023764	430	350	268	12	286	30	314	45	60.1	95.7	0.644246	411	0	6.5	0.012
GI22_35	0.314	0.038	0.0424	0.0014	0.026447	200	260	267.7	8.7	259	22	272	29	108.7	270.2	0.412699	170	0	5.9	0.013
GI22_36	0.304	0.04	0.0418	0.0016	-0.035723	180	280	263.9	10	258	22	266	31	247.3	351	0.72278	324	0	5.9	0.036
GI22_37	0.31	0.045	0.042	0.0018	0.27055	220	310	265	11	271	28	270	35	146.6	258	0.582912	323	0	8.7	11.8
GI22_38	0.301	0.031	0.0413	0.0013	0.29684	210	230	261.1	8.2	257.4	19	265	24	546	645	0.868404	266	0	5.7	0.092
GI22_39	0.303	0.052	0.0416	0.0018	0.37051	10	320	262.7	11	247	30	256	40	45.5	87.6	0.532839	159	0	10.1	0.0005
GI22_40	0.297	0.039	0.0417	0.0015	0.053893	110	260	263.1	9.5	260	25	259	30	107.1	199.2	0.551555	96	0	5.9	1.85
GI22_41	0.328	0.04	0.0443	0.0014	0.21089	180	240	279.5	8.4	267	21	283	30	262	381	0.705448	189	0	4.2	0.021
GI22_42	0.319	0.039	0.0451	0.0016	-0.0083599	110	250	284	10	260	24	275	30	109.5	252	0.445761	359	0	7.8	0.0005
GI22_43	3.25	0.28	0.2439	0.0075	0.37744	1519	180	1406	39	1434	120	1463	65	197	1180	0.171267	761	0	119	56.9
GI22_44	0.315	0.063	0.0426	0.002	0.055924	-10	370	269	12	273	31	259	48	51.2	88.4	0.594164	179	0	9.2	Below LOD
GI22_45	0.256	0.052	0.0387	0.0015	-0.068762	-150	330	244.8	9.6	248	23	218	40	95.9	98.5	0.998783	324	0	6.4	0.006
GI22_46	0.316	0.043	0.0441	0.0016	0.0663	90	270	278	9.7	289	32	271	33	47.7	144	0.339817	180	0	3.5	0.017
GI22_47	0.248	0.082	0.0409	0.0024	-0.039187	-570	490	258	15	276	76	185	65	10.1	33.9	0.30564	206	0	5.9	0.007
GI22_48	0.292	0.04	0.0436	0.0015	0.072233	-10	270	275.2	9.5	276	25	254	31	89.7	195.1	0.471655	213	0	5.5	0.0009
GI22_49	0.276	0.054	0.0395	0.0019	-0.0098211	-30	360	250	12	253	34	232	42	40.25	73.7	0.560257	296	0	9.5	Below LOD
GI22_50	0.359	0.049	0.0483	0.0017	0.25541	170	260	304.2	11	318	36	304	34	64.7	258	0.257261	154	0	2.33	0.006
GI22_51	0.32	0.032	0.04478	0.0012	0.17922	170	220	282.4	7.3	274.5	20	279	24	587	523	1.1514	452	0	8.9	0.046
GI22_52	0.323	0.061	0.0443	0.002	-0.032474	0.1	330	279	12	261	32	267	45	47.4	84.4	0.576136	160	0	10.5	0.0039
GI22_53	0.335	0.08	0.0451	0.0031	0.13999	70	470	284	19	268	39	279	61	67.6	117.5	0.590198	109	0	8.2	0.2
GI22_54	0.292	0.061	0.041	0.002	0.0086747	-70	360	259	13	218	40	242	46	23.84	70.4	0.347394	325	0	7.4	Below LOD
GI22_55	0.262	0.041	0.0413	0.0018	0.31913	-140	280	261	11	267	30	229	32	54.3	112.3	0.496031	244	0	5.9	Below LOD
GI22_56	0.331	0.07	0.0439	0.0022	-0.031744	40	360	277	13	287	34	268	50	47.4	75.6	0.643199	237	0	15.8	0.251
GI22_57	0.267	0.054	0.046	0.0026	0.071186	-300	330	290	16	280	35	226	42	43.6	74.5	0.60037	124	0	6.4	Below LOD
GI22_58	0.34	0.13	0.0418	0.004	0.022021	-20	770	264	25	287	67	260	100	21.1	34.8	0.622003	91	0	10.3	0.004
GI22_59	0.344	0.081	0.0451	0.0027	0.064741	110	460	284	17	304	45	286	61	46.2	91.6	0.517411	269	0	6.3	Below LOD
GI22_60	0.38	0.13	0.0485	0.0046	-0.18409	170	700	305	28	304	59	304	97	42.1	83.3	0.518473	1550	0	4.9	13.16
GI22_61	0.33	0.13	0.0423	0.004	0.14801	10	610	267	25	391	78	266	89	45.4	78.4	0.594058	1430	0	8.7	12.9
GI22_62	0.32	0.056	0.0435	0.0025	0.02384	200	370	274	15	271	40	275	44	73.5	154.8	0.487086	238	0	4.4	0.009
GI22_63	0.256	0.08	0.0416	0.0029	0.075264	-310	480	263	18	244	55	209	61	17.28	46.3	0.38287	210	0	16.4	0.042
GI22_64	0.288	0.032	0.0405	0.0011	0.16581	140	230	255.9	6.9	254	19	254	25	347	431	0.825926	308	0	8	0.024
GI22_65	0.328	0.046	0.0445	0.0016	0.086092	160	290	280.3	9.6	293	28	280	35	136	189	0.738186	143	0	4.71	0.34
GI22_66	0.325	0.032	0.04523	0.0012	0.19145	190	220	285.1	7.5	285.6	21	284	24	427	685	0.639479	733	0	3.83	0.008
GI22_67	0.827	0.085	0.0988	0.0034	0.28197	550	230	607	20	612	55	608	46	148.4	418	0.364206	104	0	3	0.009
GI22_68	0.381	0.062	0.0515	0.0021	-0.043268	120	310	323	13	326	30	313	43	87.5	111	0.808675	124	0	8.8	0.023
GI22_69	0.278	0.05	0.0395	0.0014	0.044064	-20	310	249.9	8.9	228	27	237	38	59.2	138.4	0.438808	249	0	5.4	Below LOD
GI22_70	0.305	0.052	0.0451	0.0018	0.09368	-60	310	284.2	11	269	27	260	39	76.6	100.7	0.780348	155	0	11.1	Below LOD
GI22_71	0.304	0.041	0.043	0.0016	0.17822	160	290	271.2	9.9	265	22	266	32	222.3	381	0.598554	277	0	5.2	12.6
GI22_72	0.325	0.05	0.0459	0.0018	0.090348	60	290	289	11	270	32	275	37	61.9	138.8	0.457499	174	0	3.9	0.0055
GI22_73	0.283	0.04	0.0412	0.0018	0.37486	10	280	260	11	267	25	246	32	107.3	125.6	0.876393	341	0	10.5	0.059
GI22_74	0.314	0.044	0.0439	0.0019	0.08034	120	280	277	12	269	22	269	34	114.9	155.2	0.759482	125	0	5.7	0.123
GI22_75	0.296	0.035	0.0438	0.0013	-0.12293	60	250	276.5	8	272	23	259	27	117.2	268.3	0.448122	171	0	4.8	0.021
GI22_76	0.334	0.1	0.0438	0.0026	0.24516	200	530	276	16	282	40	279	73	45.3	92.3	0.503484	224	0	4.5	0.016
GI22_77	0.309	0.085	0.0422	0.0044	-0.11845	200	630	266	27	283	65	263	70	37.1	76.3	0.498814	1040	0	8	7.7
GI22_78	0.308	0.046	0.0443	0.0017	0.035507	110	310	279.7	10	256	29	269	35	95.5	265	0.369697	190	0	4.6	0.004
GI22_79	0.294	0.038	0.0434	0.0014	-0.11412	70	270	273.8	8.9	284	26	256	30	111.7	214.1	0.535212	128	0	5.4	0.2
GI22_80	0.303	0.049	0.0427	0.0018	-0.0088002	140	340	269	11	263	29	264	38	193	347	0.57058	258	0	4.4	2.57
GI22_81	0.399	0.046	0.0543	0.0019	0.16394	250	230	340.5	11	334	30	337	32	176.6	418	0.433414	330	0	2.6	0.032
GI22_82	0.339	0.049	0.0451	0.0016	-0.069315	210	290	284.4	10	285	27	287	36	81.2	146.5	0.568601	182	0	8.7	0.0012
GI22_83	0.316	0.029	0.0455	0.0013	0.075643	180	220	286.8	8.1	276.1	19	277	23	1171	957	1.25526	770	0	6.3	0.098
GI22_84	0.344	0.051	0.0447	0.0015	-0.0235	220	290	281.9	9.4	287	26	290	37	76	152.9	0.509912	185	0	5.9	0.0008
GI22_85	0.295	0.033	0.0446	0.0014	0.044967	70	240	281	8.6	261	22	260	26	203	315	0.661111	219	0	3.2	0.0009
GI22_86	0.411	0.04	0.0568	0.0019	0.10696	290	240	355.8	11	349	38	347	29	89.8	423	0.217783	442	0	Below LOD	Below LOD
GI22_87	0.593	0.056	0.0785	0.0021	0.27733	340	230	487.2	13	457	34	468	36	256.8	452	0.582835	167	0	2.22	0.0059
GI22_88	0.301	0.055	0.0461	0.002	0.11773	-40	310	291	12	274	36	257	40	42.3	125.1	0.346874	168	0	3	Below LOD
GI22_89	0.319	0.042	0.0463	0.0016	-0.045075	110	260	291.7	9.9	259	26	275	32	79.1	188.6	0.430253	199	0	4.63	Below LOD
GI22_90	0.309	0.034	0.044	0.0013	0.088539	170	230	277.6	8.2	271.8	20	270	26	379	452	0.860181	642	0	5.7	0.054
GI22_91	0.339	0.054	0.0454	0.0019	0.070817	160	300	286	12	289	25	284	39	79	114.7	0.706566	213	0	9.2	0.018
GI22_92	0.31	0.037	0.0453	0.0015	0.00042591	120	240	285.5	9	267	22	270	28	215	338	0.652545	144	0	4.7	0.029
GI22_93	0.28	0.034	0.0416	0.0015	0.12329	80	260	262.6	9.2	253	23	246	27	123.9	267	0.476046	196	0	3.5	0.01
GI22_94	0.318	0.066	0.0437	0.0021	0.11597	-20	370	275	13	313	42	259	50	26.8	73.3	0.375076	327	0	2.53	0.014
GI22_95	0.321	0.073	0.0427	0.0024	0.13138	90	430	269	15	248	29	266	55	67	85.7	0.802016	206	0	10.2	Below LOD
GI22_96	0.307	0.034	0.0419	0.0013	-0.065573	270	250	264.6	8.1	245	20	268	26	170.4	303	0.57692	363	0	3.3	3.6
GI22_97	0.311	0.034	0.0439	0.0014	0.075839	210	240	277	8.8	255	21	272	26	212.3	251	0.867691	337	0	11.7	Below LOD
GI22_98	0.331	0.046	0.0462	0.0018	0.13098	170	280	291.3	11	272	23	282	34	115.2	162.1	0.729052	288	0	7.7	0.097
GI22_99	0.329	0.042	0.0454	0.0018	0.13283	220	270	286	11	281	27	283	32	112.9	209.7	0.552312	183	0	39.2	0.036
GI22_100	0.268	0.065	0.045	0.0026	-0.065656	-310	380	283	16	243	48	219	50	20.16	56.2	0.367996	Below LOD	0	6.3	0.017
GI22_101	0.355	0.051	0.0433	0.0019	0.11855	370	290	273	12	291	32	298	38	67.2	155.4	0.443616	138	0	5	0.021
GI22_102	0.306	0.049	0.0434	0.002	-0.1143	180	330	274	12	276	37	264	38	64.8	154.3	0.430822	137	0	15	0.044
GI22_103	0.316	0.03	0.0462	0.0022	0.17037	150	170	291.3	13	259	18	279	24	126	337	0.383557	920	0	10.9	0.009
GI22_104	0.313	0.05	0.043	0.0023	0.038644	130	290	271.4	14	274	22	271	39	92	134	0.704323	264	0	6.5	Below LOD
GI22_105	0.325	0.032	0.0454	0.0021	0.069033	220	180	286.2	13	271.1	14	283	24	395.8	555	0.731597	135	0	4.05	0.096
GI22_106	0.272	0.053	0.0423	0.0028	0.22472	-140	320	267	17	249	25	236	43	34.3	70.1	0.501955	226	0	8.5	Below LOD
GI22_107	0.307	0.05	0.0432	0.0022	0.136	50	280	272.4	14	277	23	260	38	68.9	130.8	0.540381	290	0	8.2	Below LOD
GI22_108	0.334	0.042	0.0469	0.0022	0.094774	140	220	295.4	14	292	23	286	31	66.4	230	0.296162	166	0	3.4	0.0025
GI22_109	0.294	0.094	0.0453	0.0034	-0.16671	-400	480	285	21	290	41	215	70	19	30.97	0.629363	98	0	12.7	Below LOD
GI22_110	0.379	0.047	0.0483	0.0025	0.04656	410	240	303.7	15	320	20	319	33	355	341	1.06798	577	0	18.4	1.52
GI22_111	0.533	0.09	0.0436	0.0027	0.18145	910	330	275	17	568	51	407	57	26.1	77.1	0.347276	281	0	10.3	0.86
GI22_112	0.335	0.047	0.0447	0.0023	-0.14559	240	270	281.7	14	280	19	289	37	114.6	154	0.763401	156	0	4.3	0.0058
GI22_113	0.313	0.051	0.0401	0.0023	-0.11964	250	320	253.4	14	250	27	264	39	44.4	83.5	0.545488	211	0	6.6	0.0073
GI22_114	0.347	0.041	0.04696	0.0021	0.2505	200	210	295.8	13	282	17	296	31	136.9	283	0.496256	196	0	5.2	0.028
GI22_115	0.283	0.069	0.0447	0.0032	0.010659	-230	400	281	20	272	37	235	56	44.3	56.2	0.808642	243	0	12.7	0.79
GI22_116	0.251	0.087	0.0429	0.0032	0.15057	-570	470	270	20	249	43	197	67	15.2	44.8	0.34806	229	0	4.8	Below LOD
GI22_117	0.282	0.037	0.0396	0.002	0.30561	110	230	250.6	13	246	18	246	29	151.7	267.3	0.582205	249	0	4.47	Below LOD
GI22_118	0.301	0.043	0.0452	0.0023	0.31628	-10	230	285.1	14	271	18	264	33	167.1	187.2	0.915713	183	0	9.4	Below LOD
GI22_119	0.299	0.059	0.0465	0.0025	-0.015687	-150	320	293	16	261	20	255	46	62	87.5	0.726897	305	0	12.5	0.00086
GI22_120	0.322	0.043	0.0432	0.0023	0.010079	230	260	272.7	14	270	28	281	34	53.7	135.1	0.407763	282	0	12.1	Below LOD
GI22_121	0.328	0.036	0.043	0.0021	0.13966	320	200	271.3	13	250	14	287	28	239.5	421	0.583596	157	0	5.4	3.24
GI22_122	0.32	0.037	0.0455	0.0021	0.32499	120	200	286.7	13	276	21	276	28	88.7	201.6	0.451359	205	0	3.51	0.0001
GI22_123	0.281	0.066	0.0458	0.0031	0.0069401	-330	370	288	19	277	40	228	51	27.21	62.1	0.449496	195	0	8	Below LOD
GI22_124	0.312	0.042	0.0451	0.0022	0.12878	90	230	284.3	14	266	16	268	32	194	198.8	1.00109	492	0	10.5	0.022
GI22_125	0.279	0.052	0.0459	0.0027	0.043125	-120	320	289	17	271	32	258	47	38.8	85.5	0.465537	222	0	6.9	Below LOD
GI22_126	0.338	0.083	0.0448	0.0032	-0.029581	-40	420	282	20	289	52	272	62	14.73	45.3	0.333575	192	0	1.05	Below LOD
GI22_127	0.37	0.039	0.0443	0.0023	-0.038751	480	210	279.3	14	273	16	315	29	165.1	249.7	0.678293	202	0	7.6	0.5
GI22_128	0.331	0.053	0.0453	0.0025	-0.1692	140	300	285	16	287	24	278	40	81.5	116.8	0.71582	1720	0	7.9	13.5
GI22_129	0.317	0.042	0.0459	0.0025	0.078217	110	240	289.1	15	275	25	272	32	60.2	170.2	0.362849	251	0	2.8	0.0052
GI22_130	0.203	0.057	0.0445	0.0031	0.06876	-650	380	280	19	270	35	174	49	30.48	46.7	0.669556	91	0	6.7	Below LOD
GI22_131	0.305	0.039	0.0441	0.0022	0.028233	60	230	278.2	13	270	17	264	30	132.5	189.8	0.716158	154	0	4.3	0.036
GI22_132	0.3	0.065	0.0458	0.0029	0.12298	-200	350	289	18	304	55	244	50	13.55	44.3	0.313779	146	0	5.8	0.0019
GI22_133	0.333	0.035	0.0444	0.0021	0.093704	260	190	280.1	13	285	18	287	26	204	330	0.634169	210	0	6.5	0.0023
GI22_134	0.339	0.037	0.0439	0.0021	0.14184	310	200	277	13	276	18	291	28	150	256	0.601091	130	0	4.7	Below LOD
GI22_135	0.319	0.042	0.0449	0.0024	0.053738	140	240	283.1	15	278	24	274	32	51.4	127.5	0.413563	310	0	2.35	0.0049
GI22_136	0.327	0.057	0.0472	0.003	0.10159	-20	300	297	18	279	34	273	42	31.8	70	0.466034	Below LOD	0	8.2	Below LOD
GI22_137	0.323	0.066	0.0441	0.0028	-0.0077148	40	370	278	17	297	43	270	52	19.53	55.9	0.358409	323	0	6.6	Below LOD
GI22_138	0.315	0.042	0.0441	0.0022	0.025626	110	250	278	14	260	20	270	33	89.5	163.9	0.560187	240	0	6.7	Below LOD
GI22_139	0.26	0.11	0.0431	0.0034	-0.11945	-770	570	271	21	253	44	165	82	15.32	26.33	0.596894	113	0	11	Below LOD
GI22_140	0.281	0.06	0.0397	0.0026	0.22611	-20	350	251	16	243	63	240	48	10.06	57.5	0.179481	313	0	2.98	0.000449
GI22_141	0.304	0.053	0.0445	0.0025	0.036542	-40	300	280	15	279	20	256	40	100.4	105.3	0.978125	229	0	14.9	0.0022
GI22_142	0.346	0.04	0.0462	0.0022	0.019371	240	210	291.2	13	264	20	296	29	105.1	293	0.36798	156	0	4.1	Below LOD
GI22_143	0.363	0.041	0.0503	0.0027	0.17353	220	200	316	16	318	22	309	30	113.1	180	0.644583	155	0	2.5	0.0097
GI22_144	5.26	0.41	0.3362	0.016	0.32911	1817	120	1866	76	1840	97	1856	68	59.5	168.4	0.362463	219	0	10.4	0.0022
GI22_145	0.339	0.046	0.0451	0.0023	0.11072	180	230	284.5	14	266	17	288	34	132.8	222	0.613669	173	0	3.95	1.511e-05
GI22_146	0.16	0.13	0.0441	0.0044	-0.0092447	-1810	710	278	27	153	99	40	100	3.91	13.11	0.305959	Below LOD	0	12.3	Below LOD
GI22_147	0.315	0.041	0.0458	0.0024	0.16478	60	230	288.4	15	266	22	271	31	58.6	174.1	0.345293	242	0	3.83	Below LOD
GI22_148	0.275	0.036	0.0428	0.0023	0.067843	-20	230	269.9	14	257	16	245	30	137.8	243.1	0.581505	194	0	3.23	25.6
GI22_149	0.352	0.073	0.0415	0.0028	-0.027294	210	380	262	18	228	37	282	52	23.9	71.1	0.34484	204	0	4.9	0.027
GI22_150	0.347	0.038	0.0444	0.0023	0.26001	330	200	279.9	14	285	22	298	28	109	285	0.392347	211	0	4	0.000302
GI22_151	0.335	0.04	0.0424	0.0022	0.042366	320	220	267.5	13	257	20	287	30	99.3	209.1	0.487174	125	0	3.04	0.026
GI22_152	0.31	0.044	0.0442	0.0024	0.0011906	80	260	278.6	15	272	22	265	34	66.4	127.1	0.535934	122	0	6.8	Below LOD
GI22_153	0.322	0.049	0.0446	0.0023	-0.18532	130	290	280.9	14	258	28	278	39	49.4	101.6	0.498795	271	0	12.7	Below LOD
GI22_154	0.257	0.062	0.0428	0.0028	0.050103	-350	370	270	18	240	49	211	49	14.1	55	0.262994	306	0	5.5	0.011
TE26_1	0.277	0.027	0.0389	0.0019	0.22774	210	170	245.7	12	236	14	246	21	245.5	468	0.538139	207	0	2	Below LOD
TE26_2	0.362	0.039	0.0499	0.0023	-0.09793	240	200	313.7	14	286	23	308	28	75.5	307	0.252289	858	0	7	0.0001836
TE26_3	0.289	0.051	0.0413	0.0022	-0.097807	20	300	260.8	14	267	27	245	39	65.4	116.1	0.577876	153	0	3.9	Below LOD
TE26_4	0.268	0.028	0.0391	0.0019	0.15102	140	190	247.4	12	238	13	241	23	242.3	394	0.630879	261	0	5.7	0.0021
TE26_5	0.269	0.032	0.03914	0.0018	0.12162	100	210	247.5	11	232	17	237	25	159.9	287	0.571552	218	0	5.9	0.000448
TE26_6	0.507	0.06	0.0414	0.0021	0.20126	1160	240	261.4	13	310	21	406	40	159.8	200.5	0.81762	228	0	1110	0.189
TE26_7	0.281	0.03	0.0399	0.0019	0.11292	200	200	251.9	12	251	16	248	24	167.9	315	0.546801	498	0	9.2	5
TE26_8	0.487	0.041	0.0652	0.0029	0.29654	310	140	407.1	18	382	20	400	28	370	633	0.599635	362	0	5.5	0.473
TE26_9	0.281	0.027	0.0395	0.0019	0.12336	210	180	249.4	12	235	14	249	22	290.8	432	0.690557	454	0	5.7	4.49
TE26_10	0.275	0.027	0.04049	0.0019	0.077658	110	160	255.8	12	233	15	244	21	362.6	440	0.845404	319	0	6.3	0.029
TE26_11	0.3	0.035	0.03954	0.0019	0.060279	290	220	249.9	12	227	17	262	27	155.4	241.2	0.660941	265	0	10.7	0.01
TE26_12	0.362	0.034	0.0515	0.0023	0.19408	210	170	323.9	14	299	16	310	26	290.4	438	0.680161	274	0	4.8	0.023
TE26_13	0.289	0.038	0.0401	0.002	-0.012226	150	230	253.6	12	243	16	252	29	179.3	233	0.789429	612	0	6.1	4.61
TE26_14	0.41	0.047	0.0552	0.0029	0.48508	230	190	346	18	312	33	342	33	35.81	291.4	0.126068	1238	0	4.6	0.017
TE26_15	0.44	0.17	0.0605	0.0044	-0.023423	-620	570	378	27	311	63	260	110	7.2	14.84	0.497723	155	0	8.2	0.003
TE26_16	0.283	0.033	0.04161	0.0019	0.21035	80	200	262.8	12	254	18	249	26	141.4	249	0.582558	222	0	7.7	0.0022
TE26_17	0.329	0.036	0.0436	0.0021	0.13399	290	200	274.8	13	286	21	284	27	120	254	0.484659	302	0	6.1	0.73
TE26_18	0.274	0.029	0.04009	0.0019	0.23564	110	180	253.3	12	238	15	243	23	255.1	406	0.644575	200	0	9.2	0.138
TE26_19	0.272	0.065	0.0413	0.003	0.11774	-230	370	261	19	227	32	221	50	26.41	53.4	0.50736	233	0	7.1	4.7e-06
TE26_20	0.311	0.03	0.04197	0.0019	0.14853	290	170	265	12	250.9	13	272	23	450	603	0.765569	228	0	16.6	0.23
TE26_21	0.288	0.03	0.0398	0.0019	0.2074	220	180	251.3	12	218.3	13	254	23	212.9	298	0.732906	393	0	8.2	Below LOD
TE26_22	0.333	0.05	0.0419	0.0023	-0.022763	340	280	264	15	251	18	281	37	94.9	139.3	0.698882	260	0	13.2	0.112
TE26_23	0.285	0.03	0.03999	0.0018	0.041131	190	190	252.7	11	242	14	251	24	243.4	465	0.536978	342	0	4	Below LOD
TE26_24	1.53	0.19	0.147	0.0075	-0.028837	830	270	883	42	783	46	897	83	62.3	48.7	1.31235	146	0	17.3	0.000597
TE26_25	0.33	0.039	0.0423	0.0021	-0.040138	380	240	267.2	13	246	17	283	30	124.7	199	0.642839	165	0	5.2	Below LOD
TE26_26	0.306	0.034	0.0446	0.0022	0.087963	140	210	280.9	14	250	17	267	26	148.1	238.1	0.638094	481	0	9.6	Below LOD
TE26_27	0.289	0.034	0.0413	0.002	0.14363	120	220	260.6	12	246	15	253	27	152.6	274.4	0.570505	344	0	2.3	Below LOD
TE26_28	0.269	0.031	0.04116	0.0019	0.25716	0.1	190	260	11	240	14	238	24	275.2	372	0.758917	269	0	8.4	0.013
TE26_29	0.228	0.031	0.0403	0.002	0.28462	-280	210	254.3	12	233	15	203	26	200	212	0.967794	213	0	7	0.017
TE26_30	0.322	0.048	0.0415	0.0023	0.1174	260	280	262	14	229	16	273	36	104.8	130.2	0.825732	220	0	10.6	0.4
TE26_31	0.299	0.032	0.04042	0.0019	0.1577	290	200	255.4	11	244	16	262	25	139	333	0.428213	151	0	5.2	Below LOD
TE26_32	0.375	0.034	0.04939	0.0022	0.14984	370	170	310.7	13	282	15	321	25	277.1	492	0.577777	432	0	4.7	Below LOD
TE26_33	0.297	0.041	0.0411	0.0019	0.31584	160	240	259.8	12	234	15	257	32	186.1	266	0.717718	250	0	8.4	0.000317
TE26_34	0.395	0.041	0.0516	0.0023	0.16576	350	200	324.2	14	305	17	333	30	294.2	320	0.943152	215	0	2.57	0.0027
TE26_35	0.293	0.032	0.0406	0.002	0.25911	230	190	256.4	12	224	15	260	26	157.7	305	0.530421	221	0	5	4.79e-05
TE26_36	0.306	0.037	0.0415	0.002	0.19357	240	230	261.8	12	251	16	265	29	240.6	297	0.831052	287	0	7.2	0.019
TE26_37	0.274	0.035	0.0411	0.0021	0.0047898	70	230	259.4	13	229	18	244	29	106.8	210.5	0.520485	112	0	2.89	0.000369
TE26_38	0.663	0.066	0.0871	0.004	-0.063447	350	190	538	24	457	26	508	40	126.9	181.3	0.718047	230	0	9.9	Below LOD
TE26_39	0.259	0.029	0.04124	0.0019	0.30887	-30	190	260.5	12	240	15	233	24	193.8	318	0.625195	233	0	9.7	Below LOD
TE26_40	0.34	0.038	0.0421	0.002	0.35836	420	210	265.7	12	270	17	292	29	183	314	0.597875	450	0	16.2	6.2
TE26_41	0.324	0.036	0.0407	0.002	-0.043156	400	220	257.3	13	235	19	280	28	114.6	263	0.447011	235	0	7.5	0.000261
TE26_42	0.319	0.047	0.041	0.0023	0.073682	260	280	259	14	233	24	271	36	49.8	122.7	0.416365	204	0	5	Below LOD
TE26_43	0.367	0.042	0.0511	0.0025	0.044625	200	210	321.5	15	274	17	311	31	233.1	203.1	1.17739	195	0	8.2	0.59
TE26_44	0.315	0.031	0.0419	0.002	0.22134	340	180	264.3	12	265	17	275	24	199.8	365	0.561554	286	0	2.53	3.5
TE26_45	0.408	0.054	0.0502	0.0026	0.24153	360	250	315.8	16	295	20	336	39	188.3	160.3	1.20505	4000	0	5.4	74
TE26_46	0.377	0.038	0.0507	0.0025	0.19276	290	190	319	15	280	29	320	28	42.5	352	0.123861	1196	0	5.1	Below LOD
TE26_47	0.332	0.032	0.0415	0.002	0.033589	460	190	262.1	12	238	15	288	25	179.5	304.4	0.604935	257	0	4.9	1.3
TE26_48	0.284	0.028	0.04113	0.0019	0.11401	150	180	259.8	12	232.2	13	251	22	320.5	492	0.66827	377	0	3.9	Below LOD
TE26_49	0.285	0.033	0.0412	0.002	0.19113	130	210	259.9	12	242	14	250	26	237.1	354	0.687096	350	0	3.19	0.017
TE26_50	0.29	0.038	0.0419	0.0021	0.0198	90	230	264.5	13	237	16	252	29	117	225.9	0.531323	279	0	8.2	0.0026
TE26_51	0.419	0.043	0.0529	0.0024	0.21844	410	190	332.1	15	317	19	350	31	244.2	385	0.65069	11100	0	4.7	186
TE26_52	0.266	0.04	0.0407	0.0022	-0.027932	10	260	257.1	13	238	19	236	32	87.9	127.8	0.705581	285	0	12.1	Below LOD
TE26_53	0.293	0.052	0.0421	0.0023	0.16657	-20	300	265.7	14	249	29	247	40	42.4	102.7	0.42353	307	0	2.4	0.16
TE26_54	0.411	0.045	0.0546	0.0025	-0.096492	320	210	342.5	15	324	20	348	33	151.6	235.1	0.661509	195	0	6	Below LOD
TE26_55	0.496	0.053	0.0657	0.0033	0.13407	310	200	410	20	371	25	401	36	136.8	197.3	0.711292	128	0	5.5	Below LOD
TE26_56	0.264	0.029	0.0412	0.002	0.11773	-10	190	260.3	12	243	14	235	23	209.8	340	0.633017	206	0	9.6	0.7
TE26_57	0.361	0.036	0.0536	0.0025	0.10765	100	180	336.6	15	303	16	309	27	382	339	1.15599	247	0	3.7	0.066
TE26_58	0.56	0.11	0.0568	0.0038	0.03088	530	360	356	23	336	35	421	69	45.9	56.4	0.834877	213	0	10.6	0.064
TE26_59	0.286	0.027	0.0405	0.0019	0.13022	210	170	256.1	12	234.5	12	253	21	414.9	444	0.958627	315	0	10.3	0.071
TE26_60	0.288	0.028	0.0412	0.0019	0.046336	180	180	260.2	12	233	15	254	22	184.7	417	0.454381	497	0	3.4	0.63
TE26_61	0.293	0.034	0.0395	0.002	-0.015786	250	220	249.8	12	234	14	256	27	221.9	289.3	0.786861	204	0	6.9	0.0078
TE26_62	0.303	0.035	0.0409	0.0019	0.028771	230	210	258.4	12	242	15	264	27	251	386	0.667076	212	0	4.2	Below LOD
TE26_63	0.271	0.029	0.0413	0.002	0.048633	70	200	260.9	12	235	16	241	23	185.4	338	0.562707	231	0	8.6	0.001
TE26_64	0.364	0.039	0.051	0.0024	0.037794	180	190	320.6	15	279	16	310	28	275	501	0.563098	157	0	3.31	0.02
TE26_65	0.515	0.056	0.0694	0.0033	-0.001417	260	200	432	20	398	24	413	37	189.3	204.2	0.951007	223	0	15.9	0.014
TE26_66	0.297	0.035	0.0412	0.002	0.20705	170	220	260.1	13	232	18	258	28	123.2	225.2	0.561218	211	0	3.8	Below LOD
TE26_67	0.271	0.029	0.0401	0.0019	0.13058	100	190	253.4	12	243	15	240	23	172.4	424	0.417119	320	0	3.01	0.13
TE26_68	0.315	0.04	0.0402	0.0019	0.25974	320	230	254.2	12	230	18	272	30	111.7	214.4	0.534463	203	0	6.6	Below LOD
TE26_69	0.249	0.046	0.039	0.0021	-0.014843	-120	300	246.6	13	232	18	215	36	100.8	112	0.923276	305	0	10.2	0.012
TE26_70	0.375	0.032	0.05156	0.0022	0.18208	290	160	324	14	304	17	324	25	295.5	564	0.537486	4140	0	3.9	60
TE26_71	0.265	0.048	0.0392	0.0021	0.095464	-70	300	248	13	224	21	227	37	70.1	102.3	0.702961	339	0	8.7	0.078
TE26_72	0.293	0.032	0.03992	0.0018	0.13449	220	200	252.3	11	224.5	13	257	25	206.6	428	0.495194	238	0	3.9	0.011
TE26_73	0.29	0.031	0.0394	0.0019	0.15301	260	190	248.8	12	220	13	255	24	312	335	0.95543	225	0	5.9	0.009
TE26_74	0.301	0.036	0.04084	0.0019	0.24466	230	220	258	12	236	16	262	28	133.6	261	0.525116	164	0	9.9	Below LOD
TE26_75	0.303	0.03	0.04001	0.0018	0.10727	310	180	252.8	11	239.5	13	266	23	751	526	1.46468	324	0	8.8	0.13
TE26_76	0.269	0.031	0.04029	0.0019	0.27078	60	190	254.6	12	236	14	242	25	192.7	350	0.56481	280	0	3.44	0.015
TE26_77	0.272	0.035	0.0395	0.002	0.29469	50	220	249.9	12	240	16	238	28	161.5	237.6	0.697293	345	0	7.9	0.97
TE26_78	0.268	0.043	0.0394	0.0021	-0.12101	70	280	248.9	13	235	19	242	37	103.8	156	0.682593	248	0	2.75	Below LOD
TE26_79	0.288	0.035	0.0398	0.0019	0.13466	200	220	251.5	12	230	19	252	27	83.5	219	0.391139	178	0	3.08	Below LOD
TE26_80	0.28	0.032	0.04019	0.0019	0.19597	120	200	254	12	245	16	247	25	197.3	291	0.695542	241	0	3.35	Below LOD
TE26_81	1.578	0.13	0.1306	0.0069	0.71357	1317	120	790	39	932	47	951	53	203.2	807	0.258309	642	0	18.3	7.23
TE26_82	0.296	0.025	0.03827	0.0018	0.020363	390	160	242	11	230	14	262	19	578	983	0.603203	703	0	6.4	5.4
TE26_83	0.399	0.042	0.0533	0.0025	0.30166	270	190	334.9	15	304	19	336	30	197	317	0.637523	218	0	8	Below LOD
TE26_84	0.341	0.066	0.0478	0.0032	0.07236	30	340	301	20	296	23	285	50	74.1	68.8	1.10489	233	0	13.8	0.029
TE26_85	0.348	0.047	0.0497	0.0027	-0.057522	160	260	313	17	308	22	304	38	98.5	107.7	0.93823	181	0	9.3	0.058
TE26_86	0.303	0.034	0.04064	0.0019	0.17861	240	200	256.7	12	234	15	264	26	219.9	461	0.489343	258	0	4.02	Below LOD
TE26_87	0.28	0.03	0.04068	0.0019	0.21325	110	190	257	12	240	18	247	24	128.6	310	0.425567	102	0	1.93	0.000518
TE26_88	0.331	0.034	0.04109	0.0019	0.088214	420	200	259.5	12	250	15	287	26	416	454	0.939997	1080	0	8800	14.1
TE26_89	0.286	0.041	0.0411	0.0021	-0.16887	110	250	259.8	13	230	21	258	34	57.9	137.3	0.43261	216	0	7.5	0.088
TE26_90	0.289	0.039	0.0418	0.002	0.034175	90	240	263.9	12	237	16	255	31	114.2	202.4	0.578821	250	0	6.5	Below LOD
TE26_91	0.296	0.033	0.0402	0.002	0.10847	220	200	254.2	12	234	16	259	25	136.2	288	0.485147	262	0	3.12	Below LOD
TE26_92	0.285	0.039	0.0411	0.0021	0.11247	100	240	259.3	13	238	21	248	30	88	181	0.498762	194	0	10.8	0.00121
TE26_93	0.377	0.035	0.0531	0.0024	0.01193	230	170	333.6	15	295	16	325	27	367	440	0.855662	266	0	4	0.084
TE26_94	0.384	0.038	0.0525	0.0024	0.076314	260	180	329.7	15	310	16	330	29	266.3	331	0.825339	225	0	13.4	Below LOD
TE26_95	0.32	0.031	0.0428	0.002	0.25687	300	180	270.1	12	261.9	14	282	25	471	570	0.847686	458	0	5.6	0.98
TE26_96	0.271	0.033	0.0399	0.002	0.19653	40	220	252.1	12	244	14	238	27	173	222.6	0.797278	234	0	6.5	Below LOD
TE26_97	0.348	0.041	0.0492	0.0024	0.12811	140	210	309.4	15	289	17	297	30	167.1	223.7	0.766301	301	0	8	0.000251
TE26_98	0.299	0.031	0.0402	0.0019	0.026115	260	190	253.8	12	232.9	13	262	24	274	316	0.889513	236	0	7.2	2.34
TE26_99	0.296	0.031	0.03964	0.0019	-0.15917	290	210	250.5	12	227	14	263	25	165.5	328	0.517622	216	0	4.5	0.031
TE26_100	0.301	0.045	0.0401	0.0021	0.066912	170	270	253.1	13	232	18	258	34	124.9	163.6	0.783192	349	0	6.4	Below LOD
TE26_101	0.437	0.039	0.0528	0.0025	0.27615	510	160	331.5	15	330	17	365	27	377	589	0.656621	345	0	7.8	3.74
TE26_102	0.306	0.04	0.0407	0.002	0.051528	250	240	257.2	12	240	16	264	30	149.2	214.9	0.712232	870	0	8.9	5
TE26_103	0.267	0.036	0.0409	0.002	0.15822	-20	230	258.5	13	231	16	238	30	124.8	233.1	0.549239	170	0	8.4	Below LOD
TE26_104	0.281	0.035	0.0394	0.0019	0.020855	140	220	249.2	12	235	18	247	27	120.3	226.6	0.544621	210	0	6	5.91e-07
TE26_105	0.599	0.064	0.0795	0.0037	0.13892	340	200	493	22	437	24	478	44	143	200.1	0.733125	583	0	11	0.042
TE26_106	0.304	0.032	0.0407	0.0019	0.075266	300	200	256.9	12	242	17	266	24	159.9	299.1	0.54843	131	0	6	9e-08
TE26_107	0.293	0.032	0.04016	0.0019	0.16272	200	190	253.8	12	237.8	13	257	24	221.1	388	0.584583	960	0	6.1	16.2
TE26_108	0.389	0.034	0.0517	0.0023	0.099021	320	160	325	14	306	17	331	24	351.3	452	0.797313	437	0	4.2	0.022
TE26_109	0.29	0.033	0.0402	0.0019	0.069523	180	210	254	12	260	16	254	26	156.8	293	0.548994	2140	0	3.68	67
TE26_110	0.237	0.049	0.0396	0.0023	-0.11378	-260	340	250	14	270	34	208	41	33.2	65.1	0.523174	169	0	10.6	9.23e-06
TE26_111	0.285	0.032	0.03951	0.0018	0.21647	180	200	249.7	11	234	13	251	25	330	375	0.902759	267	0	10	Below LOD
TE26_112	0.285	0.036	0.0386	0.0019	0.16275	200	240	243.9	12	229	18	249	29	99.2	159.7	0.637229	168	0	7.1	Below LOD
TE26_113	0.291	0.028	0.04075	0.0019	-0.22136	220	180	257.4	12	246	16	257	22	193.6	456	0.435541	208	0	2.88	0.01
TE26_114	0.24	0.044	0.0407	0.0023	-0.010758	-260	290	256.8	14	246	21	207	35	66.7	104.7	0.653534	237	0	16.2	0.0031
TE26_115	0.303	0.061	0.0378	0.0024	0.011921	110	380	239	15	258	29	249	47	36.4	64.2	0.581641	224	0	16.4	Below LOD
TE26_116	0.279	0.03	0.0398	0.0019	0.054723	180	200	251.6	12	226	16	250	25	132.7	281.3	0.483938	199	0	4.2	0.3
TE26_117	0.298	0.03	0.0401	0.0019	0.33231	280	180	253.5	12	231.5	12	262	23	331	399	0.851028	220	0	5.5	0.087
TE26_118	0.293	0.032	0.0409	0.0019	0.11211	190	200	258.3	12	247	16	257	25	210	337	0.639261	480	0	8.4	5.2
TE26_119	0.443	0.037	0.0577	0.0027	0.37974	380	150	361.8	17	356	20	370	26	263	837	0.322344	220	0	4.8	1.84
TE26_120	0.261	0.031	0.0401	0.0019	0.18336	-10	200	253.3	12	249	16	231	25	202	324	0.639581	770	0	7.3	6.1
TE26_121	0.439	0.041	0.0602	0.0027	0.12641	260	170	376.5	17	348	21	365	29	111.6	378	0.302874	920	0	5.3	0.0027
TE26_122	0.294	0.032	0.04013	0.0019	0.04955	250	210	253.6	11	228	14	261	27	334.2	446	0.768707	297	0	6.6	0.0047
TE26_123	0.258	0.028	0.0396	0.0019	0.039747	60	200	250.3	12	245	15	233	24	219	287	0.782801	222	0	7.8	0.0061
TE26_124	0.369	0.03	0.04073	0.0018	0.12571	750	140	257.4	11	283	15	317	22	547	1087	0.516234	1026	0	4110	3.19
TE26_125	0.293	0.029	0.0417	0.002	0.28395	200	180	263.1	12	247	15	258	23	208.5	336	0.636584	172	0	7.9	0.021
TE26_126	0.282	0.026	0.03978	0.0017	0.031157	240	170	251.4	11	232.7	13	250	20	407	495	0.843487	385	0	8.3	6.08e-06
TE26_127	0.263	0.03	0.03963	0.0019	0.19198	30	200	250.5	12	234	14	234	24	205	307	0.685022	190	0	4.1	Below LOD
TE26_128	0.375	0.039	0.0517	0.0025	0.099005	250	190	324.8	15	302	16	322	30	197.8	259	0.783458	Below LOD	0	5	0.012
TE26_129	0.384	0.039	0.0529	0.0025	0.1735	270	180	332	15	313	19	329	28	177.8	379	0.481262	265	0	2.8	Below LOD
TE26_130	2.02	0.23	0.1981	0.01	-0.032098	860	230	1163	54	1070	58	1083	78	83.8	56.1	1.53239	288	0	15.5	0.018
TE26_131	0.351	0.033	0.053	0.0024	-0.18967	110	170	333.1	15	300	16	303	24	236.5	475	0.510771	337	0	5.5	0.28
TE26_132	0.286	0.031	0.04016	0.0019	-0.0047276	210	200	253.8	12	231	14	252	24	240	320	0.769397	245	0	6.5	Below LOD
TE26_133	0.217	0.04	0.0396	0.0027	0.0093578	-290	310	250	17	222	32	196	34	37.3	69.7	0.548991	156	0	13.2	0.0002613
TE26_134	1.589	0.14	0.1617	0.0079	0.11054	920	160	965	44	892	57	952	57	42.2	218	0.198584	117	0	7.4	0.078
TE26_135	0.391	0.038	0.0515	0.0024	0.092257	350	190	323.9	15	304	18	331	28	220.5	315.2	0.717648	293	0	9.7	1.42
TE26_136	0.278	0.028	0.04112	0.0019	0.020828	110	180	259.7	12	238	15	247	22	173.2	281.6	0.630963	220	0	6	Below LOD
TE26_137	0.281	0.031	0.0407	0.002	0.14929	160	200	257.3	12	227	16	251	26	144.6	350	0.423828	189	0	5.1	0.0028
TE26_138	0.365	0.04	0.0505	0.0025	0.0031659	220	210	317.5	15	311	19	310	30	170.2	170.4	1.02466	208	0	6	0.023
TE26_139	0.351	0.049	0.053	0.0028	0.046372	40	240	333	17	289	19	302	37	143	146	1.00478	350	0	9.8	0.0078
TE26_140	0.261	0.028	0.03967	0.0019	0.044291	50	190	250.7	12	241	16	233	23	137.6	348	0.405628	207	0	8.1	Below LOD
TE26_141	0.276	0.038	0.0399	0.0019	0.15266	80	240	252.3	12	221	15	241	30	122.8	194	0.64936	213	0	9.1	0.088
TE26_142	0.301	0.039	0.0414	0.0021	-0.016066	190	230	261.4	13	227	16	261	30	158.5	215	0.756275	290	0	11.6	0.048
TE26_143	0.273	0.03	0.0401	0.002	0.13756	120	200	253.2	12	230.1	13	241	24	209.6	324	0.663644	253	0	7.5	0.32
TE26_144	0.294	0.032	0.0408	0.0021	0.068245	230	210	258	13	237	15	258	26	162	311.2	0.534028	291	0	4	1.07
TE26_145	0.266	0.028	0.0391	0.0019	0.16997	140	200	248.1	12	247	18	236	22	129.1	259.9	0.509576	282	0	2.65	0.0051
TE26_146	0.32	0.041	0.0403	0.002	0.047651	340	240	254.8	12	234	16	275	31	158.9	194	0.840255	314	0	8.8	0.0056
TE26_147	0.38	0.042	0.0509	0.0026	0.12741	320	200	319.7	16	302	19	325	31	181	254	0.731028	146	0	7.8	0.0087
TE26_148	0.297	0.044	0.0409	0.0022	-0.049728	160	270	258.2	14	267	31	255	34	38.4	132	0.298433	320	0	12.9	0.267
TE26_149	5.11	0.39	0.3372	0.015	0.34986	1794	120	1872	71	1692	92	1832	68	35.2	220.9	0.163469	608	0	4.3	0.0057
TE26_150	0.265	0.051	0.04	0.0025	0.20496	-80	320	252	15	225	24	231	41	46.9	81.4	0.591068	185	0	11.5	0.013
TE26_151	0.374	0.043	0.0533	0.0026	-0.00010581	180	220	334.6	16	297	21	320	33	130.5	216.1	0.619505	162	0	8	0.0023
TE26_152	0.271	0.032	0.0402	0.002	-0.0032543	80	210	254.3	12	247	19	240	25	129.1	255.7	0.517946	231	0	4	1.58e-08
TE26_153	2.11	0.18	0.1967	0.0087	0.35602	1090	140	1157	47	1043	53	1141	58	161.9	178.9	0.928379	181	0	13.9	0.013
TE26_154	0.263	0.035	0.0406	0.0024	0.19087	70	250	257	15	235	21	236	30	64.1	128.3	0.512531	191	0	11.2	2.68e-07
TE26_155	0.358	0.033	0.0519	0.0026	0.25886	180	160	326.1	16	306	24	308	24	63.9	368	0.178132	443	0	6	0.0029
TE26_156	0.574	0.05	0.0773	0.0035	0.35751	350	150	480	21	440	22	457	32	221	420	0.539799	133	0	2.27	3.39e-06
TE26_157	0.416	0.044	0.0543	0.0027	0.20692	370	190	341	16	335	22	351	32	150	357	0.431034	214	0	7.4	0.98
TE26_158	0.302	0.033	0.0407	0.002	0.012722	280	210	257.2	12	230	15	264	26	181.9	330.1	0.565296	149	0	8.9	5.1e-05
TE26_159	0.268	0.03	0.0405	0.002	0.023396	70	200	255.6	12	243	16	238	24	150.3	285	0.541007	169	0	5.5	Below LOD
TE26_160	0.285	0.03	0.03958	0.0018	0.15604	240	190	250.2	11	243	15	254	24	210.9	418	0.517594	1320	0	4.7	17.4
TE26_161	0.249	0.037	0.0412	0.0021	0.13652	-130	240	260.2	13	242	20	219	29	83.5	163.9	0.522633	236	0	8.1	0.079
TE26_162	0.366	0.039	0.0529	0.0025	0.099021	160	190	332.3	15	301	17	312	28	153.6	276.4	0.570088	157	0	5	Below LOD
TE26_163	0.3	0.026	0.0351	0.0018	0.54938	628	140	222.3	11	244	15	265	20	521	1523	0.350935	1390	0	16	11.06
TE26_164	0.29	0.03	0.0417	0.002	0.26929	180	180	263	12	241.8	13	258	23	340	370	0.942684	246	0	8.3	0.0054
TE26_165	0.412	0.045	0.053	0.0026	-0.10825	390	210	332.9	16	295	16	348	33	240	229	1.07514	240	0	8.8	0.039
TE26_166	0.3	0.03	0.0325	0.002	0.31641	780	190	205.8	12	215	14	266	24	424	738	0.589384	790	0	32.7	6.6
TE26_167	0.27	0.03	0.0408	0.002	0.12675	80	190	257.5	12	230	14	242	24	202.5	330	0.629506	394	0	5.4	1.92
TE26_168	0.395	0.034	0.0379	0.0022	0.29964	1050	160	240	14	239	15	336	24	611	753	0.832406	1530	0	32.3	12.4
TE26_169	0.362	0.046	0.0504	0.0025	0.17949	190	230	316.8	15	285	17	306	34	120.1	161.9	0.761001	198	0	4.7	0.296
TE26_170	0.352	0.046	0.0514	0.0026	0.043021	70	240	323	16	293	17	297	34	187.2	169.7	1.13165	213	0	12.1	0.017
TE26_171	0.388	0.033	0.0415	0.002	0.11684	830	150	262	12	224.4	11	330	24	1279	1033	1.27016	2000	0	39.6	23.3
TE26_172	0.294	0.036	0.0402	0.002	0.11553	220	220	253.9	12	228	14	256	28	190.5	265.8	0.73524	347	0	8.5	1.05
TE26_173	0.385	0.041	0.0517	0.0024	0.16252	260	190	324.7	15	310	19	325	30	178.5	326	0.561707	143	0	2.76	0.006
TE26_174	0.447	0.045	0.0515	0.0023	0.078513	600	190	323.6	14	301.4	14	370	31	1141	437	2.67851	1037	0	47.5	64
TE26_175	0.435	0.05	0.0563	0.0027	0.13285	320	210	352.8	17	345	20	359	35	103.1	177.7	0.595196	756	0	10.3	5.4
TE26_176	0.269	0.031	0.0403	0.0019	0.1402	70	200	254.7	12	240	15	238	24	216.1	348	0.637037	1270	0	5.1	17.8
TE26_177	0.443	0.039	0.0594	0.0027	0.18208	320	160	371.9	16	358	21	369	27	121.1	474	0.262093	497	0	5.6	0.067
TE26_178	0.287	0.034	0.0415	0.0021	-0.00098662	110	220	262.2	13	242	18	252	27	121.4	239.4	0.520216	147	0	2.76	0.0006
TE26_179	0.269	0.029	0.04073	0.0019	0.039172	70	200	257.3	12	235	15	239	23	186	319.1	0.597964	165	0	11.9	0.209
TE26_180	0.4	0.036	0.0552	0.0026	0.23819	280	160	346.3	16	333	17	342	27	307	656	0.480091	680	0	7.4	1.51
TE26_181	0.317	0.031	0.0399	0.002	0.11779	440	170	252.4	12	244	15	280	22	325	518	0.643639	390	0	3.6	3.4
TE26_182	0.276	0.036	0.0408	0.0021	0.10109	40	240	257.8	13	220	16	241	29	135.2	182.3	0.760815	168	0	15.5	0.035
TE26_183	0.273	0.025	0.03688	0.0017	0.055386	300	170	233.4	11	208	13	243	20	406	750	0.555333	631	0	11.8	4.19
TE26_184	0.272	0.029	0.04008	0.0018	0.12698	70	180	253.3	11	232	17	242	22	137.1	394	0.356969	568	0	2.99	1.69
TE26_185	0.3	0.045	0.0389	0.0021	0.1705	240	270	245.7	13	262	22	263	36	74.6	144.4	0.529981	313	0	7	0.013
TE26_186	0.295	0.032	0.0408	0.002	0.19629	200	190	257.7	12	262	17	259	25	138.8	322.8	0.441108	254	0	8.7	Below LOD
TE26_187	0.3	0.026	0.04022	0.0018	0.29471	300	150	254.2	11	235.8	12	265	20	567	668	0.870754	230	0	6.2	0.014
TE26_188	0.302	0.035	0.03925	0.0018	0.19227	300	210	248.1	11	231	15	263	27	156.7	268.1	0.599599	177	0	6	Below LOD
TE26_189	0.272	0.026	0.04008	0.0019	0.21432	110	170	253.3	12	238	15	244	22	180.9	337.9	0.549211	237	0	4	0.0027
TE26_190	0.247	0.043	0.0391	0.0023	0.023334	-120	290	247	14	239	21	215	33	56.8	101.2	0.57578	152	0	6.6	0.009
TE26_191	0.389	0.073	0.0401	0.0025	0.10758	540	360	253	15	300	45	320	53	32.4	76.3	0.435622	190	0	14.6	0.045
TE26_192	0.394	0.047	0.0517	0.0026	-0.13098	260	230	324.8	16	295	20	330	34	149.5	176.7	0.867948	396	0	8.6	2.53
TE26_193	0.296	0.034	0.03903	0.0018	0.047005	280	210	246.8	11	251	17	263	27	134	269.7	0.509698	219	0	8.2	0.000874
TE26_194	0.279	0.041	0.0402	0.0021	-0.013861	90	280	254.3	13	251	18	242	32	131.7	140.4	0.962294	364	0	28.1	Below LOD
TE26_195	0.371	0.035	0.0508	0.0024	-0.1016	250	180	319.6	15	296.5	15	320	27	364	393	0.950162	367	0	9.8	0.82
TE26_196	0.382	0.042	0.0505	0.0023	0.15476	260	200	317.5	14	315	19	323	30	181.8	288.2	0.647126	163	0	5.9	0.001848
TE26_197	0.375	0.045	0.0507	0.0023	0.15389	210	230	319	14	312	18	316	34	248.4	236.6	1.07703	268	0	16.5	Below LOD
TE26_198	0.286	0.036	0.0403	0.0019	0.22239	90	220	254.5	12	230	15	250	28	207.6	270.3	0.787899	205	0	7.2	Below LOD
TE26_199	0.283	0.03	0.0393	0.0019	0.11786	180	190	248.2	12	233	13	250	23	241.3	359	0.689528	177	0	4.5	0.0026
TE26_200	0.272	0.026	0.03985	0.0019	-0.03143	80	180	251.8	12	230	13	242	21	291	392	0.761546	499	0	5.4	Below LOD
TE21_1	0.386	0.039	0.0536	0.0018	0.29242	190	170	336.6	11	316	17	327	28	229.8	447	0.527389	352	0	5.4	0.013
TE21_2	0.335	0.031	0.04264	0.0014	0.3056	390	150	269.2	8.6	276.8	12	291	23	1002	873	1.17745	744	0	5.9	1.69
TE21_3	1.47	0.14	0.1547	0.0054	0.31663	750	170	927	30	902	51	899	59	52.5	124.5	0.432592	282	0	14	Below LOD
TE21_4	0.289	0.029	0.04111	0.0014	0.27163	140	170	259.6	8.6	252.3	12	254	23	383	400	0.982263	504	0	5.3	0.76
TE21_5	0.277	0.029	0.04054	0.0013	0.13382	110	180	256.2	8.2	241	14	248	24	298.5	463	0.661382	246	0	13.1	0.008
TE21_6	0.292	0.028	0.04039	0.0013	0.12158	210	160	255.2	7.8	250	14	257	22	218.2	444	0.504151	277	0	4	0.018
TE21_7	0.34	0.036	0.0416	0.0015	0.066542	430	200	262.8	9.4	269	17	293	28	156	303	0.528167	530	0	16.1	5
TE21_8	0.31	0.031	0.04118	0.0013	0.14628	280	160	260.1	8	242	13	271	23	335	559	0.614783	344	0	3.7	0.21
TE21_9	0.312	0.031	0.03961	0.0014	0.04545	400	180	251.4	8.9	263	16	273	24	234.1	340	0.706336	224	0	6.4	0.02
TE21_10	0.316	0.044	0.0403	0.0018	0.18288	270	250	254.3	11	259	20	270	33	97.5	126.3	0.791936	395	0	14.3	0.02
TE21_11	0.362	0.037	0.0498	0.0016	0.095201	210	180	313.4	10	309	19	309	27	164.8	428	0.395005	499	0	6.2	0.0001628
TE21_12	0.281	0.026	0.04085	0.0013	0.14553	130	150	258.1	8.3	250	12	249	20	415	566	0.752178	269	0	13	0.04
TE21_13	0.381	0.038	0.0434	0.0015	0.029405	610	190	273.8	9.3	302	18	323	28	190	302	0.64541	265	0	4.6	0.102
TE21_14	0.371	0.038	0.0542	0.0017	0.1595	120	170	340.4	10	321	17	319	30	275	369	0.764531	378	0	5.8	0.105
TE21_15	3.06	0.25	0.2369	0.0076	0.26496	1444	110	1369	39	1367	62	1411	61	134	167.3	0.821671	241	0	6.2	0.45
TE21_16	0.287	0.031	0.0406	0.0014	0.070899	160	180	256.5	8.7	243	13	253	24	254	313	0.832489	236	0	8.4	0.017
TE21_17	0.272	0.03	0.04056	0.0013	0.40452	50	180	256.2	8.1	247	13	244	25	273.5	407	0.689369	299	0	4.6	Below LOD
TE21_18	0.881	0.07	0.1048	0.003	0.36338	565	120	642	18	661	38	637	37	103.1	1247	0.0848167	109	0	10.8	0.019
TE21_19	0.521	0.056	0.0442	0.0015	-0.24781	1140	200	278.7	9.1	329	20	422	39	320	389	0.843897	460	0	6.5	2.28
TE21_20	0.282	0.066	0.0384	0.0021	0.2629	-190	400	243	13	223	44	228	51	15.59	36.7	0.435782	73	0	4.6	Below LOD
TE21_21	0.388	0.046	0.054	0.002	0.20114	190	210	338.7	12	315	18	329	35	186	182.3	1.04668	252	0	7.8	0.016
TE21_22	0.288	0.029	0.0408	0.0014	0.048193	170	180	257.8	8.6	253	13	257	22	175.9	343	0.526091	164	0	3.76	Below LOD
TE21_23	0.306	0.032	0.0418	0.0015	0.34673	230	170	263.7	9.1	244	14	268	25	230	373	0.632569	137	0	9.5	0.019
TE21_24	0.322	0.038	0.0411	0.0017	-0.065713	340	230	259.4	11	254	18	277	29	93.3	163.1	0.586836	930	0	5.9	6.7
TE21_25	0.297	0.027	0.0407	0.0014	0.063172	270	160	257.2	8.8	247	13	264	22	304.9	487	0.64227	240	0	4.3	0.083
TE21_26	0.365	0.047	0.0415	0.0015	0.27086	560	220	261.8	9.4	290	27	313	36	108.7	238.6	0.467356	156	0	4.1	0.019
TE21_27	0.269	0.032	0.0409	0.0015	0.14426	10	200	258.3	9	240	14	237	26	253	348	0.745814	262	0	5.2	0.0049
TE21_28	0.307	0.034	0.0407	0.0017	0.008463	310	210	256.9	10	254	15	268	26	172	276	0.639305	286	0	4.3	1.489e-05
TE21_29	0.309	0.03	0.0416	0.0015	0.14732	280	170	262.5	9.2	256	14	271	23	262.8	491	0.549076	233	0	1.78	0.014
TE21_30	0.366	0.056	0.054	0.0023	-0.12183	50	270	339	14	310	27	303	41	65.5	124	0.541887	163	0	7.4	0.000237
TE21_31	0.393	0.045	0.0559	0.0022	-0.06551	140	210	351	14	369	22	330	33	129	175	0.756207	422	0	5.1	Below LOD
TE21_32	0.31	0.036	0.0429	0.0018	0.0036457	200	220	270.9	11	270	16	269	29	223	242	0.945319	444	0	11.2	0.01
TE21_33	0.445	0.05	0.0567	0.0024	0.1577	370	210	355	15	372	24	366	35	132.8	203	0.671106	150	0	4.14	1.56
TE21_34	0.298	0.028	0.04091	0.0014	0.18597	250	170	258.4	8.6	252	15	262	22	251	403	0.638936	225	0	8.1	0.41
TE21_35	0.392	0.052	0.0532	0.002	0.25099	210	220	333.8	12	326	18	332	38	200	196	1.0468	613	0	7.8	Below LOD
TE21_36	0.307	0.034	0.04093	0.0014	0.33163	240	180	258.5	8.5	252	14	268	26	251	345	0.746352	244	0	5.3	0.047
TE21_37	0.296	0.034	0.0412	0.0016	0.072642	180	200	260.4	10	257	16	259	26	144.6	291	0.509758	323	0	5	0.001035
TE21_38	0.279	0.036	0.03928	0.0014	0.11725	100	220	248.3	8.4	236	13	244	28	261.5	304.9	0.879839	715	0	12.2	3.46
TE21_39	0.537	0.055	0.0707	0.0024	0.017722	310	180	440	14	427	34	429	36	35.4	258	0.140758	628	0	5	Below LOD
TE21_40	1.78	0.15	0.1723	0.0067	0.47863	1020	130	1023	37	1098	77	1025	55	36.5	641	0.0584149	580	0	6	0.07
TE21_41	0.289	0.032	0.0413	0.0014	0.32405	120	180	260.9	8.8	251	13	253	25	407.2	417	1.00175	Below LOD	0	14.1	0.02
TE21_42	0.275	0.032	0.0405	0.0015	0.069612	80	200	255.8	9.4	257	15	243	25	198.2	261.9	0.776349	264	0	6.9	0.146
TE21_43	4.36	0.33	0.3094	0.0099	0.30721	1630	97	1736	48	1685	75	1695	61	99.3	168.6	0.6042	211	0	49.9	0.016
TE21_44	0.278	0.029	0.04052	0.0013	0.20878	140	180	256	8.3	252	14	246	22	262	433	0.620729	263	0	6	0.0019
TE21_45	0.302	0.033	0.0399	0.0015	0.1204	280	200	252	9.3	274	18	263	26	181.8	327	0.570342	90	0	10.4	0.0061
TE21_46	0.372	0.038	0.0512	0.0017	0.26086	220	170	321.5	11	322	17	316	28	278	402	0.709427	225	0	6.5	Below LOD
TE21_47	0.284	0.027	0.0391	0.0013	0.17176	260	170	247.2	8.1	259	15	252	21	251.8	486	0.531506	228	0	3.08	0.179
TE21_48	0.319	0.04	0.0407	0.0015	0.20402	310	220	257.4	9.6	273	18	275	30	169.4	253	0.686882	369	0	13.6	0.086
TE21_49	0.309	0.029	0.0417	0.0015	0.23106	290	160	263.1	9.2	262	18	271	22	171.9	450	0.391879	284	0	2.7	0.079
TE21_50	1.038	0.085	0.04323	0.0013	0.40837	2582	92	272.8	8.3	697	33	721	43	696	1248	0.572115	2580	0	8.9	59.2
TE21_51	0.262	0.027	0.0401	0.0014	0.018812	40	180	253.5	8.9	244	13	234	22	222	337	0.67579	218	0	11.4	0.0033
TE21_52	0.258	0.033	0.0394	0.0015	0.093593	50	220	249.1	9.1	246	15	232	27	190	299	0.651886	1460	0	8.3	15.8
TE21_53	0.293	0.041	0.0419	0.0016	0.10283	60	240	264.5	10	260	17	253	31	106.9	146.1	0.750614	147	0	4.8	Below LOD
TE21_54	0.287	0.028	0.04047	0.0014	0.19209	190	160	255.7	8.5	250	13	254	22	278.5	391	0.730697	338	0	8	6.2e-05
TE21_55	0.281	0.069	0.041	0.0024	0.042069	-170	390	259	15	254	36	234	54	21.38	45.7	0.479933	222	0	12.2	0.001003
TE21_56	0.522	0.046	0.051	0.0019	0.48193	980	140	320.7	12	372	19	426	31	520	806	0.661846	820	0	7.3	12.7
TE21_57	0.293	0.033	0.0405	0.0015	0.44518	210	180	255.8	9	251	15	260	26	237	371	0.655335	161	0	11.4	0.037
TE21_58	0.397	0.037	0.0542	0.0019	0.24789	270	160	340	11	312	18	336	27	233	346	0.690826	173	0	7.4	0.026
TE21_59	0.366	0.039	0.0418	0.0014	0.59563	610	150	264	8.7	277	16	316	28	1069	1351	0.811729	475	0	3.71	1.49
TE21_60	0.385	0.044	0.0467	0.0017	0.18393	460	200	293.9	10	295	22	329	33	88.1	214	0.422329	208	0	4.4	0.164
TE21_61	0.28	0.032	0.0405	0.0016	0.29107	130	200	255.8	9.8	261	16	246	25	161.2	286	0.578213	181	0	3.8	0.02
TE21_62	0.899	0.075	0.0403	0.0014	0.15407	2428	120	254.8	8.6	998	55	645	40	194.7	687	0.290736	771	0	6.9	21.7
TE21_63	0.276	0.029	0.0406	0.0014	-0.053002	130	190	256.6	8.9	257	17	244	23	186.1	449	0.425196	184	0	3.07	0.0004
TE21_64	0.301	0.034	0.0393	0.0014	0.2858	300	190	249.5	8.9	258	16	263	26	255	413	0.633402	143	0	7.7	Below LOD
TE21_65	0.302	0.035	0.0401	0.0015	0.38399	300	200	253.6	9.4	259	17	263	27	176	299	0.603852	193	0	3.19	Below LOD
TE21_66	0.33	0.037	0.04164	0.0014	0.19258	370	190	262.9	8.4	275	19	285	28	208.5	300	0.712974	810	0	3.05	8.7
TE21_67	0.578	0.055	0.0679	0.0024	0.48214	570	160	423	15	447	24	457	35	248.5	365	0.698429	308	0	8.2	0.29
TE21_68	0.368	0.035	0.0504	0.0018	0.39502	280	160	317.1	11	324	16	318	27	271	407	0.683068	223	0	2.96	0.49
TE21_69	0.276	0.036	0.04	0.0017	0.24461	110	230	252.8	10	268	19	245	30	93.6	182.8	0.525277	182	0	4.6	Below LOD
TE21_70	0.378	0.064	0.0502	0.0026	0.1385	130	300	316	16	323	23	307	46	78.9	76.5	1.05805	170	0	9.4	0.0064
TE21_71	0.854	0.076	0.1025	0.0032	0.17971	540	150	629	19	613	32	619	42	191.4	281	0.698754	107	0	4.7	0.361
TE21_72	0.256	0.035	0.0397	0.0017	0.17866	-20	230	251.1	10	277	20	226	28	89.5	185	0.496295	135	0	5.8	Below LOD
TE21_73	0.547	0.052	0.0571	0.0021	0.18483	820	170	357.6	13	496	34	437	34	122.4	268	0.468528	138	0	162	0.65
TE21_74	0.407	0.054	0.0548	0.0023	0.096996	210	230	344	14	331	25	336	38	93.5	158	0.607077	201	0	5.8	0.015
TE21_75	0.325	0.037	0.0413	0.0013	0.11651	380	200	260.8	8.2	265	17	285	28	206.3	400	0.529088	200	0	7.1	0.9
TE21_76	0.29	0.036	0.0395	0.0018	-0.02814	260	230	249.8	11	254	19	253	28	102.1	168.4	0.621975	177	0	8.4	Below LOD
TE21_77	0.787	0.1	0.0458	0.0016	0.39558	1790	220	288.5	9.7	541	49	566	55	427	706	0.620458	810	0	10.8	13.2
TE21_78	0.278	0.04	0.0393	0.0015	-0.059806	120	250	248.1	9.5	249	17	242	31	143	194	0.756177	180	0	6.6	0.08
TE21_79	0.62	0.11	0.0438	0.0018	0.57786	1150	270	276.4	11	431	57	455	63	377	560	0.690625	550	0	6	14.8
TE21_80	0.369	0.041	0.0468	0.0019	0.046495	440	210	294.6	12	322	17	318	32	301	257	1.2015	355	0	7.5	0.249
TE21_81	0.279	0.046	0.0387	0.0018	0.0051098	150	310	244.9	11	256	24	246	38	50.6	95.2	0.545259	199	0	11.3	Below LOD
TE21_82	0.315	0.038	0.0402	0.0015	0.19762	380	220	254.2	9.3	273	18	280	32	169.9	285	0.611558	228	0	4	0.000436
TE21_83	0.33	0.035	0.0489	0.0017	0.24113	120	180	307.6	10	321	17	285	26	424	389	1.11816	608	0	6.3	0.034
TE21_84	0.276	0.031	0.0409	0.0015	0.26326	110	180	258.1	9.6	252	19	244	24	125.3	299	0.429901	210	0	1.74	3.43e-05
TE21_85	0.425	0.055	0.0481	0.0019	0.13358	540	250	302.5	12	349	27	349	40	89.6	159	0.578096	232	0	11	0.045
TE21_86	0.27	0.048	0.0384	0.0017	0.00031376	10	300	242.7	11	250	23	231	37	60.4	95.4	0.649498	164	0	4.05	1.99e-06
TE21_87	0.245	0.033	0.0408	0.0017	0.2355	-160	210	257.9	11	255	17	218	26	124.4	239	0.533963	424	0	4.8	0.0027
TE21_88	0.63	0.053	0.0517	0.0017	0.21045	1350	140	324.8	10	420	20	492	33	459	650	0.724416	755	0	7.1	11.05
TE21_89	0.458	0.066	0.0552	0.0022	0.11563	400	270	346	13	381	33	367	45	57.6	138.7	0.426025	9600	0	5.5	128
TE21_90	1.19	0.17	0.0457	0.0015	0.22308	2280	320	287.9	9.5	744	74	746	83	664	1054	0.646274	1730	0	4.2	46.1
TE21_91	0.284	0.034	0.0405	0.0016	0.13073	130	200	256.1	10	272	20	249	26	152.5	263	0.594844	212	0	3.04	0.0031
TE21_92	0.3	0.03	0.042	0.0014	0.24058	210	160	265.4	8.9	249.6	12	264	23	443	599	0.758693	225	0	3.71	0.105
TE21_93	0.325	0.036	0.0426	0.0016	0.21283	310	190	268.8	9.6	265	14	281	27	255	383	0.683015	236	0	4.9	0.038
TE21_94	0.295	0.03	0.041	0.0014	0.074938	250	180	259.1	8.9	255	14	259	23	291	431	0.692635	361	0	7.1	0.96
TE21_95	0.293	0.034	0.0415	0.0014	0.18867	150	200	262.4	8.8	255	15	256	26	191.7	425	0.462724	317	0	4.7	Below LOD
TE21_96	0.493	0.06	0.0688	0.0028	0.039538	190	220	429	17	400	31	395	40	48.5	150.2	0.331254	505	0	7.9	Below LOD
TE21_97	0.308	0.052	0.0402	0.0019	0.14379	160	300	254	12	288	28	259	40	42.7	108.7	0.402984	91	0	6.2	0.089
TE21_98	0.278	0.028	0.0413	0.0015	0.12995	110	170	260.6	9.6	251	14	247	22	185.3	317	0.59966	230	0	5.8	0.099
TE21_99	0.433	0.05	0.0418	0.0014	0.4731	900	210	263.7	8.8	343	27	362	36	311	534	0.597459	367	0	3.5	2.8
TE21_100	0.432	0.072	0.0402	0.0023	-0.1012	850	340	254	14	327	33	354	52	43	77.1	0.572141	207	0	5.2	0.4
TE21_101	0.302	0.041	0.0427	0.0019	0.023616	160	250	269.5	11	264	17	260	32	154.9	198	0.802556	208	0	7	0.128
TE21_102	0.289	0.032	0.0404	0.0014	0.23593	190	190	255.4	8.7	244	15	254	25	260	378	0.705619	191	0	8.7	0.22
TE21_103	0.319	0.03	0.04259	0.0014	0.12527	330	160	268.8	8.7	273	13	278	22	520	940	0.567498	1710	0	1.49	30
TE21_104	0.283	0.031	0.0412	0.0015	0.019046	150	190	260.5	9.1	245	18	249	24	248	388	0.655706	405	0	2.85	6.55e-05
TE21_105	0.299	0.036	0.041	0.0015	-0.0071203	210	220	259.2	9.5	258	18	260	28	149.2	252	0.607375	233	0	7	0.013
TE21_106	0.36	0.036	0.0523	0.0019	0.28174	200	170	328.7	12	326	18	312	28	143.3	294	0.500021	228	0	4.5	0.0032
TE21_107	0.306	0.033	0.0407	0.0014	0.20176	310	190	256.9	8.9	251	15	267	26	162.3	309	0.538827	173	0	6.2	Below LOD
TE21_108	0.285	0.038	0.043	0.0018	0.13114	20	230	271.4	11	301	21	248	30	118.7	185.8	0.655381	292	0	6.3	0.07
TE21_109	0.289	0.058	0.0398	0.0021	0.10857	60	340	251	13	273	23	247	46	86.5	96.9	0.915759	313	0	19.2	0.054
TE21_110	0.308	0.038	0.0411	0.0016	0.26636	250	210	259.8	9.7	270	18	267	29	152.5	310	0.504658	319	0	6.9	Below LOD
TE21_111	0.307	0.034	0.0418	0.0015	-0.024132	270	200	263.7	9.6	281	19	268	26	150.1	295	0.521973	280	0	1.74	0.031
TE21_112	0.296	0.038	0.0407	0.0019	0.12022	190	230	257	12	259	21	257	29	133.2	210	0.65069	181	0	5.8	Below LOD
TE21_113	0.308	0.039	0.0406	0.0016	0.13763	270	220	256.5	10	256	18	267	29	110.9	234	0.486188	211	0	2.92	Below LOD
TE21_114	0.261	0.058	0.0427	0.0022	-0.16144	-220	360	269	14	286	27	218	45	39.4	69.5	0.581568	203	0	13.7	0.000365
TE21_115	0.269	0.038	0.0396	0.0016	0.23348	0.1	230	250.3	9.7	258	17	235	30	97	193.8	0.51346	309	0	12.4	Below LOD
TE21_116	0.298	0.029	0.03974	0.0013	0.14247	330	180	251.2	7.9	248	12	262	23	365	498	0.751887	263	0	3.68	0.015
TE21_117	0.472	0.048	0.0425	0.0014	0.20377	1090	190	268.3	8.9	306	16	390	34	690	745	0.950127	639	0	4940	5.02
TE21_118	0.288	0.036	0.0396	0.0016	0.066688	210	210	250	9.9	248	15	252	28	120.2	214	0.576209	158	0	3.06	0.000519
TE21_119	0.301	0.03	0.0418	0.0014	0.047137	240	170	263.9	8.9	267	15	264	23	248	494	0.515008	1120	0	3.75	8
TE21_120	0.44	0.053	0.052	0.0019	0.21523	550	220	326.8	12	474	47	362	36	68.2	288	0.24293	695	0	5.3	0.071
TE21_121	0.295	0.028	0.04138	0.0014	0.20633	220	160	261.3	8.7	265	15	260	22	249.1	494	0.517292	401	0	3.19	5.2
TE21_122	0.316	0.038	0.0411	0.0016	0.062125	300	220	259.8	9.9	265	16	273	29	204.4	247	0.848932	282	0	9.5	0.019
TE21_123	0.284	0.031	0.0415	0.0015	0.3586	90	180	262.1	9.4	264	13	250	24	248	429	0.593039	152	0	5.7	0.0001442
TE21_124	0.371	0.04	0.0421	0.0015	0.12904	590	190	265.5	9.3	310	17	315	29	248	417	0.610105	153	0	15.9	0.54
TE21_125	0.281	0.028	0.04298	0.0014	0.16078	30	160	271.2	8.8	265	15	249	22	252.1	508	0.509094	181	0	1.46	Below LOD
TE21_126	0.378	0.039	0.0507	0.0019	0.091829	310	180	319	11	319	21	321	28	145	377	0.394562	511	0	5.4	Below LOD
TE21_127	0.274	0.037	0.0411	0.0018	0.14544	70	250	259.7	11	275	23	249	32	93.3	125.3	0.76387	610	0	9.3	3.2
TE21_128	0.312	0.041	0.0403	0.0018	0.24921	320	230	254.5	11	272	21	273	33	102.6	130.3	0.807778	335	0	6.9	0.063
TE21_129	0.78	0.13	0.0542	0.002	0.46983	1300	260	340.2	12	570	77	545	67	202.6	346	0.600693	182	0	5.8	0.88
TE21_130	0.263	0.033	0.0412	0.0015	0.12835	-60	210	260.4	9.5	257	17	232	26	135.5	247	0.56277	210	0	4.8	1.3
TE21_131	0.38	0.048	0.0506	0.002	0.23334	260	230	317.9	12	321	26	323	36	76.5	142.4	0.551113	127	0	3.01	Below LOD
TE21_132	0.289	0.031	0.0403	0.0014	0.28745	210	180	254.4	8.8	251	17	257	25	126.7	299	0.434705	228	0	3.54	Below LOD
TE21_133	0.269	0.048	0.0401	0.0021	-0.047255	10	300	253	13	274	21	236	38	91.7	101.3	0.928643	261	0	24.4	0.04
TE21_134	0.362	0.053	0.0511	0.0024	0.16881	130	250	321	15	353	28	302	38	48.4	122.2	0.406315	170	0	7.6	Below LOD
TE21_135	0.28	0.029	0.0413	0.0015	0.16911	130	180	261	9	257	18	248	23	205.6	343	0.614919	151	0	8.7	1.216e-05
TE21_136	0.259	0.03	0.0418	0.0016	0.038168	-80	190	263.8	9.9	266	16	230	23	190.8	364	0.537732	336	0	4	2.36
TE21_137	0.284	0.042	0.0393	0.0017	0.10125	140	260	248.6	10	263	22	246	33	74.1	102.5	0.741623	185	0	8.5	0.021
TE21_138	0.283	0.031	0.0411	0.0016	0.13757	120	190	259.7	9.6	267	20	249	24	119.8	245	0.501626	157	0	11.9	Below LOD
TE21_139	0.357	0.046	0.0408	0.0017	0.20612	530	230	258	10	328	24	306	35	122.4	221	0.56817	261	0	9.4	1.08
TE21_140	0.399	0.038	0.052	0.0016	0.31672	350	150	326.9	10	334	19	337	27	257	518	0.50897	279	0	2.54	0.05
TE21_141	0.283	0.03	0.0404	0.0015	0.031502	160	180	255.4	9.3	268	16	250	23	214.5	355	0.619852	300	0	3.68	1.7
TE21_142	1.29	0.26	0.0496	0.0026	0.84204	1970	340	312	16	860	150	730	110	250	421	0.609182	253	0	26.6	1.03
TE21_143	0.28	0.037	0.0406	0.0016	0.04113	80	230	256.3	10	254	19	245	29	73.1	211.4	0.354733	459	0	7.3	2.19e-05
TE21_144	0.256	0.033	0.0404	0.0015	0.1025	-70	220	255.4	9.3	270	18	226	27	120.2	227	0.54321	301	0	5.6	Below LOD
TE21_145	0.576	0.052	0.0684	0.0025	0.2905	570	150	427	15	456	28	457	33	94.6	353	0.274919	935	0	5.1	0.0018
TE21_146	4.88	0.41	0.3134	0.0099	0.27355	1789	120	1756	48	1832	87	1781	69	72.1	78.5	0.942225	84	0	4.9	0.01
TE21_147	0.326	0.05	0.0505	0.0022	-0.10242	0.1	280	317	14	319	21	275	38	117.6	93.8	1.28616	306	0	11.9	0.41
TE21_148	0.305	0.033	0.0413	0.0018	0.1003	260	190	261	11	288	19	266	25	168.9	278	0.623267	234	0	5.8	0.035
TE21_149	0.283	0.042	0.041	0.0019	-0.027124	60	270	258.7	12	298	25	244	33	97.7	190	0.527509	255	0	3.5	Below LOD
TE21_150	0.275	0.032	0.04	0.0014	0.2085	120	200	252.8	8.6	277	17	243	25	211	312	0.693772	287	0	4.05	Below LOD
TE21_151	0.297	0.048	0.0396	0.0018	0.15076	170	280	250.4	11	258	23	253	37	52.5	129	0.417502	118	0	4.7	0.077
TE21_152	0.29	0.035	0.0431	0.0017	0.23195	40	200	272.1	10	270	20	253	27	125	226	0.567402	204	0	2.99	5.09e-06
TE21_153	0.57	0.1	0.0416	0.0018	0.437	1140	290	262.8	11	430	50	427	59	198	242	0.839342	3420	0	160	40.5
TE21_154	1.09	0.15	0.0518	0.0019	0.40761	2030	240	325.6	12	544	40	708	72	377	446	0.867152	1890	0	25.4	21.7
TE21_155	0.29	0.029	0.04086	0.0014	0.1772	190	170	258.1	8.5	260	13	256	22	455	640	0.729324	243	0	10.2	0.011
TE21_156	0.307	0.034	0.0399	0.0014	0.021387	320	200	252.4	8.5	258	16	268	26	214.7	305	0.72214	342	0	6	0.54
TE21_157	0.326	0.05	0.0422	0.0018	0.19907	200	260	266.1	11	273	28	276	37	45.2	107	0.433355	377	0	3.8	0.012
TE21_158	0.278	0.04	0.0417	0.0019	0.055214	60	260	263	12	256	22	251	34	89	130.8	0.698025	243	0	14.7	0.086
TE21_159	0.293	0.031	0.0417	0.0015	0.085674	190	190	263.5	9.4	291	16	261	25	174	327	0.545872	275	0	8.7	0.94
TE21_160	0.297	0.037	0.0418	0.0016	0.42035	170	200	264.1	9.7	273	17	263	29	137.9	291	0.486139	219	0	5.3	Below LOD
TE21_161	0.367	0.049	0.0487	0.002	0.055456	250	240	306.5	12	314	21	309	35	100.5	139	0.74172	160	0	6	0.000854
TE21_162	0.419	0.075	0.0414	0.0016	0.52097	600	270	261.5	9.9	356	43	334	48	143.9	269	0.548779	202	0	420	0.33
TE21_163	0.362	0.034	0.0489	0.0017	0.29433	280	150	307.7	10	334	17	310	25	413	660	0.641941	296	0	7.4	0.193
TE21_164	0.364	0.038	0.0509	0.002	0.26373	240	180	320.2	12	316	16	315	29	246	269	0.938149	436	0	9.7	Below LOD
TE21_165	0.307	0.057	0.0414	0.002	0.19612	120	300	261	12	272	20	264	43	77.3	93.2	0.850849	311	0	10.7	Below LOD
TE21_166	0.315	0.029	0.0426	0.0014	0.33613	300	160	268.6	8.9	273	13	278	24	549	591	0.952958	458	0	5.2	0.41
TE21_167	0.277	0.027	0.0412	0.0014	0.26773	120	170	260.1	8.7	268	14	246	21	428	608	0.722153	214	0	5.7	0.065
TE21_168	0.301	0.033	0.0403	0.0016	0.12415	280	200	254.8	9.9	261	17	263	26	120.8	248	0.499694	124	0	5.3	Below LOD
TE21_169	0.283	0.036	0.0399	0.0015	0.10499	140	230	251.9	9.6	256	18	248	28	134	214	0.642362	420	0	6.9	2.5
TE21_170	0.288	0.04	0.0403	0.0018	0.23366	140	240	254.8	11	270	17	249	32	147.6	207	0.731484	130	0	4.9	0.02
TE21_171	0.331	0.056	0.0388	0.0017	0.2229	310	300	245.3	10	250	22	276	41	62.6	105.8	0.606985	315	0	13.6	0.06
TE21_172	0.281	0.029	0.04162	0.0014	-0.014834	130	180	262.8	8.5	266	15	249	22	272	395	0.706416	401	0	4.8	0.65
TE21_173	0.356	0.036	0.0516	0.0019	0.093244	170	180	324.4	12	336	21	305	27	155.6	292	0.546658	429	0	Below LOD	1.91
TE21_174	0.267	0.032	0.04015	0.0013	0.21577	70	200	253.7	8.2	255	14	236	25	261	320	0.836719	296	0	5.7	0.82
TE21_175	0.292	0.032	0.0415	0.0015	0.1754	180	190	262.3	9.4	253	16	257	25	208	349	0.611402	237	0	8.1	1.11
TE21_176	0.292	0.038	0.0405	0.0016	0.15498	160	220	255.7	10	263	19	254	29	103.9	158.7	0.671626	225	0	7.4	0.000565
TE21_177	0.402	0.049	0.0516	0.0021	0.17366	330	210	324	13	360	20	340	36	217	286	0.778364	278	0	6.2	0.045
TE21_178	0.278	0.035	0.0402	0.0018	0.079105	130	230	254.1	11	275	18	244	28	155	199	0.799038	297	0	8.1	4.02e-05
TE21_179	0.29	0.029	0.0406	0.0015	0.094822	220	180	256.5	9.3	256	16	256	23	178	299	0.610714	307	0	5.1	0.08
TE21_180	0.412	0.06	0.0423	0.0018	0.45597	810	260	266.7	11	320	30	339	39	87.1	133.2	0.670815	339	0	8.4	0.4
TE21_181	0.301	0.031	0.0406	0.0015	0.21267	300	180	256.5	9.6	270	16	263	24	220	392	0.575739	216	0	7.6	0.0028
TE21_182	0.269	0.027	0.04044	0.0013	0.24487	130	180	255.5	8.3	257	17	239	21	231	482	0.491648	334	0	2.92	Below LOD
TE21_183	0.306	0.038	0.0397	0.0016	-0.17618	330	240	250.9	9.7	284	20	265	29	144.9	256	0.580654	297	0	7.8	Below LOD
TE21_184	0.377	0.042	0.0513	0.0018	0.20838	250	190	322.2	11	346	19	319	31	240	386	0.637842	226	0	3.13	0.04
TE21_185	0.429	0.051	0.0545	0.0021	0.28048	350	210	342.1	13	367	23	354	36	113.3	172.2	0.674972	187	0	5.9	0.166
TE21_186	0.287	0.034	0.0397	0.0015	0.17933	180	200	251	9.2	275	20	251	26	155	252	0.630987	287	0	7	0.003
TE21_187	0.295	0.033	0.0422	0.0016	0.26941	150	200	266.4	9.7	272	18	258	26	215.5	338	0.654063	277	0	3.6	0.77
TE21_188	0.281	0.032	0.0403	0.0014	-0.0025915	140	200	254.4	8.7	265	17	247	25	201	288	0.715966	285	0	6.7	Below LOD
TE21_189	0.303	0.034	0.0401	0.0015	0.18593	310	190	253.5	9.5	262	16	268	27	202	325	0.637613	108	0	7.5	0.0087
TE21_190	0.293	0.045	0.0412	0.0019	0.14377	130	270	260	12	265	20	251	35	76.1	143.2	0.545168	224	0	4.8	Below LOD
TE21_191	0.307	0.043	0.0426	0.0018	0.18321	110	240	268.6	11	265	19	264	32	140	203	0.707491	248	0	8	Below LOD
TE21_192	0.368	0.071	0.041	0.002	0.22064	380	330	259	12	395	44	313	54	50.8	97.4	0.535049	220	0	23.2	0.27
TE21_193	0.621	0.056	0.0806	0.0025	0.43012	380	140	500	15	520	30	485	35	109.7	628	0.179199	178	0	1.76	0.047
TE21_194	0.285	0.031	0.0417	0.0015	0.24527	140	190	263.4	9.5	276	16	251	25	310	448	0.70986	189	0	5.9	0.0029
TE21_195	0.267	0.026	0.0409	0.0014	0.24483	70	170	258.3	8.6	266	15	238	21	312	456	0.701906	197	0	7.4	0.32
TE21_196	0.331	0.04	0.042	0.0015	0.31784	370	210	265	9	281	15	284	30	201.8	329	0.629237	240	0	6.8	0.63
TE21_197	0.315	0.043	0.0403	0.0019	0.099459	310	240	254.6	12	272	21	270	32	103.2	206	0.513927	183	0	9.8	0.014
TE21_198	0.401	0.048	0.0419	0.0016	0.34268	740	210	264.2	9.9	328	23	334	34	251	460	0.559764	1540	0	5.9	11.8
BR07_1	0.515	0.079	0.0581	0.003	-0.19547	430	340	364	18	367	38	411	53	211.9	273	0.796264	370	0	25.2	0.096
BR07_2	0.386	0.038	0.05	0.0018	0.098815	220	210	314.3	11	304	15	324	29	414	408	1.04095	493	0	10.9	0.013
BR07_3	0.482	0.035	0.0629	0.0022	0.33528	240	170	393.3	13	373	23	396	24	256	775	0.338865	1630	0	22.5	0.064
BR07_4	0.473	0.039	0.0606	0.0022	-0.035501	260	190	378.9	14	355	21	387	27	204.6	393	0.534075	1840	0	35.6	0.028
BR07_5	0.396	0.027	0.0545	0.002	0.44525	160	150	341.9	12	371	17	335	20	490	734	0.68484	685	0	23.1	Below LOD
BR07_6	0.429	0.03	0.0575	0.0019	0.23821	230	170	360.4	12	338	14	359	22	714	922	0.794431	686	0	14.5	Below LOD
BR07_7	2.03	0.17	0.1939	0.0074	0.38063	880	180	1141	40	1170	66	1104	55	66.1	234	0.289784	830	0	9.4	0.32
BR07_8	5.49	0.31	0.342	0.015	0.52225	1793	110	1894	69	2031	98	1890	47	343	701	0.501955	410	0	13.3	1.73
BR07_9	1.992	0.063	0.182	0.0055	0.065826	1079	100	1078	30	1028	47	1108	21	146	855	0.175176	1493	0	18.3	0.033
BR07_10	13.3	0.52	0.506	0.017	0.46244	2672	78	2639	72	2454	85	2692	38	256	297	0.884245	446	0	18.7	0.115
BR07_11	0.394	0.031	0.0524	0.002	0.12283	250	180	328.9	12	333	17	332	22	430.8	550	0.80353	399	0	18.1	0.9
BR07_12	0.404	0.032	0.0532	0.0017	0.067924	260	180	333.9	10	325	14	339	23	606	787	0.789927	557	0	12	0.77
BR07_13	0.43	0.041	0.0531	0.0022	0.40669	420	200	333	13	322	17	359	29	957	1562	0.628521	1920	0	16.4	18
BR07_14	0.407	0.04	0.0538	0.002	0.029345	250	220	337.7	12	327	17	338	30	298	407	0.751123	1460	0	14.6	38.8
BR07_15	1.95	0.11	0.1831	0.0066	0.16698	1100	120	1083	36	801	63	1094	37	135.4	799	0.173844	630	0	11	1.6
BR07_16	0.358	0.034	0.0505	0.0019	0.29824	160	190	317.8	12	312	23	308	25	458	906	0.518593	993	0	55.4	0.94
BR07_17	0.386	0.038	0.0507	0.0021	0.044724	280	210	318.6	13	315	15	325	27	383	457	0.859749	721	0	5.8	0.064
BR07_18	0.505	0.052	0.0649	0.0025	0.0298	290	220	405	15	395	20	403	35	257.1	373	0.707102	480	0	23.2	0.79
BR07_19	0.764	0.065	0.0921	0.0041	0.27522	550	200	568	24	580	130	573	38	78	1820	0.0439655	740	0	Below LOD	0.68
BR07_20	7.5	1.5	0.272	0.04	0.96952	2680	150	1530	200	3120	170	2030	190	110	577	0.195572	222	0	4.7	Below LOD
BR07_21	17.26	0.74	0.537	0.02	0.52612	3054	84	2768	81	3010	130	2945	42	183.2	354	0.530898	260	0	7	Below LOD
BR07_22	0.396	0.031	0.0559	0.0019	0.1493	190	170	350.4	12	369	15	335	22	471.6	793	0.610084	401	0	5.6	Below LOD
BR07_23	1.471	0.068	0.1522	0.0057	0.41649	907	120	912	32	1082	41	911	28	273.5	561	0.500131	354	0	8.5	Below LOD
BR07_24	0.476	0.043	0.0636	0.0023	0.23561	330	200	397.4	14	390	20	393	31	295.7	490	0.619076	204	0	13.2	0.028
BR07_25	0.401	0.029	0.0552	0.0018	0.38084	280	160	346.3	11	341.9	9.5	342	21	978	885	1.13366	786	0	11.4	0.142
BR07_26	0.382	0.045	0.0504	0.0023	-0.010501	270	250	317	14	317	23	318	33	160.7	229.2	0.719267	501	0	23.5	1.23
BR07_27	0.375	0.04	0.0496	0.002	0.013434	330	240	312	12	340	20	316	30	269	384	0.718638	777	0	8.7	Below LOD
BR07_28	0.356	0.047	0.0494	0.0024	0.083311	290	290	311	15	294	20	304	35	399	544	0.752425	660	0	18.3	0.032
BR07_29	0.623	0.033	0.0793	0.0027	0.389	480	140	492	16	476	17	488	21	935	875	1.09621	687	0	16.9	0.078
BR07_30	0.522	0.035	0.0685	0.0029	0.1808	430	170	427	18	422	32	424	23	275.7	1516	0.186563	1480	0	10.1	1.25
BR07_31	0.442	0.033	0.0576	0.002	0.10483	430	180	360.9	12	343	16	367	23	353.5	698	0.519545	757	0	16.5	0.129
BR07_32	0.344	0.043	0.0595	0.0024	0.15329	-210	210	372	15	353	21	290	31	179.5	270	0.682008	377	0	25	0.018
BR07_33	0.392	0.036	0.0546	0.0021	0.05266	320	220	342.6	13	311	20	334	28	228.7	323	0.726361	643	0	12.2	0.015
BR07_34	13.26	0.44	0.532	0.018	0.55824	2724	75	2748	73	2588	88	2695	32	107.1	197	0.557715	505	0	12.8	0.013
BR07_35	0.412	0.035	0.0576	0.002	0.12074	300	200	360.9	12	368	21	346	26	298	663	0.461096	464	0	6.4	Below LOD
BR07_36	0.359	0.034	0.0502	0.002	0.10021	300	220	315.7	12	311	16	309	27	292	347	0.863261	470	0	8.8	0.17
BR07_37	0.422	0.055	0.054	0.0024	0.27044	370	280	339	15	332	23	347	40	198.5	312	0.652672	568	0	14.9	0.78
BR07_38	0.406	0.03	0.0567	0.0018	0.093217	300	170	355.2	11	325	14	341	22	621	803	0.79335	456	0	15.3	0.41
BR07_39	0.383	0.043	0.0506	0.0021	0.016953	320	240	318	13	298	14	320	31	403	235.7	1.75402	908	0	23.4	0.178
BR07_40	0.31	0.044	0.0501	0.002	-0.17151	-50	280	314.7	12	302	20	263	33	141.4	175	0.828897	618	0	22.2	Below LOD
BR07_41	0.377	0.034	0.0545	0.002	-0.049297	250	200	342.3	12	323	17	319	25	282.3	431	0.671928	718	0	7.4	0.086
BR07_42	2.37	0.12	0.219	0.0072	0.34442	1239	120	1276	38	1203	45	1228	37	2880	1770	1.6692	980	0	29	7.7
BR07_43	0.43	0.039	0.0567	0.0022	-0.11414	400	210	356	14	352	19	356	28	226	378	0.613346	342	0	9.1	0.013
BR07_44	0.363	0.04	0.0558	0.002	0.062194	100	220	349.9	12	340	14	311	30	422.9	383	1.13273	525	0	17.5	0.081
BR07_45	0.415	0.058	0.0559	0.0025	0.22441	260	280	350	15	339	26	342	43	124.3	207.6	0.614232	324	0	7.2	0.206
BR07_46	1.3	0.1	0.1335	0.0049	0.23739	950	170	807	28	838	40	827	44	181	308	0.602861	331	0	18.2	0.175
BR07_47	1.22	0.1	0.1319	0.0055	0.10597	870	190	798	31	750	68	800	46	97.2	543	0.183635	870	0	11.1	Below LOD
BR07_48	0.361	0.041	0.051	0.002	0.14211	210	230	320.4	12	300	11	304	30	483	361	1.37255	969	0	16.4	0.09
BR07_49	0.884	0.067	0.1074	0.0044	0.48086	650	160	658	25	633	47	638	35	347	1546	0.230255	620	0	54.4	Below LOD
BR07_50	0.349	0.022	0.0493	0.0017	0.18874	310	160	310.4	10	303	11	301	17	752	861	0.895991	608	0	4.3	0.061
BR07_51	0.315	0.022	0.04474	0.0015	0.26549	270	160	282.1	9.3	265	12	275	17	558	978	0.585308	5300	0	7	35
BR07_52	0.351	0.075	0.0508	0.0024	0.032995	-100	370	319	15	292	22	276	54	104.9	113.4	0.948968	435	0	15.3	Below LOD
BR07_53	0.371	0.062	0.0473	0.0023	0.038255	280	310	298	14	303	22	310	45	192.5	172.1	1.14746	522	0	19.8	0.018
BR07_54	0.396	0.032	0.0537	0.0018	0.26322	340	180	337.2	11	335	19	333	23	325.4	566	0.58978	546	0	5.5	0.224
BR07_55	0.775	0.041	0.096	0.0029	0.38872	570	130	590.8	17	558	18	577	23	777	737	1.08154	128	0	22.4	0.086
BR07_56	0.39	0.029	0.0554	0.0019	0.057089	260	170	347.6	12	334	14	330	21	494	593	0.854597	413	0	11.4	0.055
BR07_57	0.432	0.034	0.0581	0.002	0.15296	400	190	363.9	12	349	21	362	24	328.8	622	0.542289	590	0	5.7	0.19
BR07_58	1.8	0.1	0.1781	0.0058	0.31609	1020	130	1056	32	960	35	1033	37	211.4	458	0.473509	391	0	14.7	0.128
BR07_59	0.366	0.066	0.0478	0.0025	0.071847	140	330	301	15	306	28	295	46	119.6	127.1	0.965327	428	0	33.4	Below LOD
BR07_60	0.502	0.039	0.062	0.0024	0.097941	530	190	388	14	392	16	407	26	537	484	1.1382	398	0	56	0.126
BR07_61	0.379	0.034	0.0503	0.0018	0.18081	350	200	316.2	11	297	14	321	25	393	592	0.68102	1183	0	21	0.175
BR07_62	0.332	0.043	0.0489	0.002	0.12916	90	260	307.8	12	312	18	282	33	282	386	0.749464	454	0	18.9	0.28
BR07_63	0.354	0.039	0.0508	0.0021	0.21003	230	230	320	13	335	20	299	29	192.5	275.1	0.717842	360	0	20	0.085
BR07_64	0.442	0.037	0.0562	0.0021	0.17202	480	190	352.3	13	342	19	368	25	486	901	0.553351	583	0	3.2	0.47
BR07_65	0.448	0.027	0.062	0.0019	-0.019702	310	160	387.5	12	379	13	372	20	441	991	0.456514	679	0	13.4	0.26
BR07_66	1.268	0.062	0.1379	0.0047	0.29462	900	130	832	27	845	34	829	30	216.9	402	0.553506	452	0	10.1	0.049
BR07_67	0.299	0.067	0.0477	0.0025	0.010367	-250	360	300	15	271	24	241	49	124.3	120.3	1.05997	480	0	26.5	Below LOD
BR07_68	0.402	0.059	0.0526	0.0035	0.0062229	430	330	331	21	304	29	338	43	481	653	0.75565	1340	0	680	0.37
BR07_69	0.716	0.057	0.0866	0.0029	0.33468	560	180	535	17	537	28	539	34	240.3	602	0.409493	533	0	62	0.213
BR07_70	4.11	0.22	0.2906	0.01	0.38248	1704	120	1643	52	1779	58	1646	44	346	593	0.598564	530	0	12.7	0.143
BR07_71	4.99	0.27	0.3303	0.011	0.14276	1833	100	1839	55	1880	130	1812	44	557	582	0.981796	700	0	495	0.02
BR07_72	0.447	0.026	0.0625	0.002	0.30543	320	140	390.6	12	371	13	372	18	574	1203	0.48948	331	0	13.3	0.019
BR07_73	0.38	0.033	0.0535	0.0019	0.046396	240	190	335.6	12	323	15	321	24	406.2	633	0.658302	473	0	12.9	0.065
BR07_74	0.388	0.042	0.0514	0.0026	0.19662	350	240	323	16	317	23	327	30	206.6	306	0.692625	468	0	26.6	0.85
BR07_75	0.401	0.063	0.0496	0.0024	0.21893	420	320	312	15	339	38	333	45	241.8	328	0.756261	510	0	36.1	2.47
BR07_76	0.412	0.079	0.0517	0.0026	-0.065399	230	370	325	16	331	27	333	57	128.6	134.7	0.979405	572	0	33	Below LOD
BR07_77	1.705	0.072	0.1696	0.0059	0.47252	1045	110	1009	32	937	48	1004	27	242	1380	0.179898	1280	0	12.9	4.46
BR07_78	0.336	0.031	0.0464	0.0017	0.60349	280	190	292	10	281	15	289	23	521	587	0.910518	1226	0	12.1	0.162
BR07_79	0.39	0.034	0.0572	0.0022	0.074973	200	190	358.2	13	343	23	333	26	210	348	0.619055	367	0	5.2	0.024
BR07_80	0.431	0.036	0.0569	0.002	0.31052	380	180	356.7	12	344	15	362	27	464.3	594	0.801865	399	0	13.6	Below LOD
BR07_81	0.416	0.04	0.0552	0.0021	0.12207	340	210	346.3	13	345	19	346	28	328.3	388	0.868017	364	0	25.1	0.034
BR07_82	0.47	0.06	0.0591	0.0029	0.10901	410	260	370	18	371	24	381	40	239	324	0.756732	1020	0	23	6.9
BR07_83	2.42	0.12	0.2225	0.0072	0.42742	1174	120	1294	38	1221	39	1236	36	253	349	0.743677	157	0	17.3	0.08
BR07_84	0.479	0.051	0.0606	0.0025	0.024032	410	240	379	15	368	20	388	35	367	428.5	0.878626	495	0	23.5	Below LOD
BR07_85	1.77	0.1	0.1715	0.0076	0.74857	1090	110	1019	42	1209	42	1021	37	204.4	923	0.227179	445	0	5.2	0.076
BR07_86	0.419	0.035	0.0569	0.0019	0.11064	350	190	356.8	12	354	16	354	26	408.2	455	0.920345	1490	0	36.6	16
BR07_87	2.09	0.13	0.1469	0.0052	0.36776	1720	120	883	29	721	33	1136	46	346.5	676	0.52583	2040	0	45.5	0.65
BR07_88	7	0.39	0.366	0.016	0.44065	2248	99	2007	74	2590	120	2104	48	992	1980	0.513967	730	0	17.7	8.23
BR07_89	0.503	0.081	0.0556	0.003	0.10733	480	350	348	18	423	52	394	57	56.7	130.9	0.444357	219	0	20.6	0.023
BR07_90	0.339	0.037	0.0476	0.002	0.10058	200	220	299.5	12	292	13	289	27	615	425.8	1.48169	888	0	32.8	0.096
BR07_91	0.444	0.074	0.0581	0.0029	-0.13001	210	340	363	18	340	25	347	52	124.8	152.4	0.840076	517	0	26.5	0.013
BR07_92	0.398	0.04	0.0541	0.0023	0.31261	290	210	339	14	328	12	332	28	789	395	2.04913	1359	0	29.4	1.61
BR07_93	0.286	0.033	0.0468	0.0019	-0.087481	0.1	240	294.9	12	314	23	254	27	149.5	312	0.491559	439	0	11.4	Below LOD
BR07_94	1.457	0.092	0.1523	0.006	0.4083	890	160	913	33	861	45	899	39	146.8	343	0.439057	485	0	9.7	0.008
BR07_95	0.335	0.039	0.0513	0.0019	0.26257	20	220	322.4	12	290	13	285	29	366.4	337.5	1.11371	661	0	12.2	Below LOD
BR07_96	0.488	0.091	0.0591	0.0029	-0.053433	220	360	370	18	380	30	369	60	138	105.9	1.33682	501	0	33.7	0.013
BR07_97	0.352	0.05	0.0483	0.0023	-0.17126	220	310	304	14	285	21	295	38	204.4	171.8	1.22053	788	0	44.3	0.25
BR07_98	0.404	0.063	0.0549	0.0027	0.13406	190	290	344	16	349	27	326	44	121.6	173.5	0.71899	360	0	14.8	Below LOD
BR07_99	0.385	0.066	0.0493	0.0022	0.071794	190	320	310	14	337	31	311	47	111.2	171.9	0.663618	481	0	16.5	0.9
BR07_100	0.383	0.037	0.0518	0.0018	0.23137	270	200	325.7	11	316	11	323	27	815	493	1.6959	1006	0	22.4	0.144
BR07_101	0.385	0.03	0.0518	0.0017	0.25785	320	170	325.8	10	319.2	9.8	326	21	1377	894	1.5801	1082	0	33.1	6.23
BR07_102	0.313	0.033	0.0488	0.002	0.087599	30	210	306.9	12	300	21	270	25	151.6	286.5	0.54283	726	0	26.7	Below LOD
BR07_103	0.329	0.033	0.0516	0.0019	0.015575	30	220	324.5	12	320	17	282	25	326.7	383	0.875063	930	0	17.2	0.53
BR07_104	0.398	0.046	0.0523	0.0021	0.22725	360	250	329	13	374	28	336	34	310	666	0.477503	330	0	13.7	0.034
BR07_105	0.522	0.029	0.0681	0.0022	0.12672	440	140	424.6	13	417	14	426	19	644	855	0.772696	383	0	19.7	0.147
BR07_106	0.361	0.018	0.0531	0.0017	0.32517	200	130	333.7	10	321.2	9.6	312	13	1583	1288	1.26082	1306	0	17.8	0.35
BR07_107	0.374	0.028	0.051	0.0018	0.26385	280	170	320.4	11	316	12	318	21	909	971	0.960359	633	0	12.5	0.018
BR07_108	0.308	0.033	0.048	0.002	0.056544	20	220	302.1	12	273	12	266	26	512	287	1.83011	789	0	19.8	0.038
BR07_109	0.411	0.025	0.05773	0.0017	0.10866	260	150	361.8	11	357	11	346	18	1132	1319	0.880421	459	0	14.8	0.107
BR07_110	0.429	0.03	0.0517	0.0018	0.19928	570	170	325	11	319	15	359	21	2101	907	2.37634	962	0	19.2	4.22
BR07_111	0.4	0.042	0.0568	0.0022	-0.017533	210	230	356	13	355	24	334	30	186.7	329	0.582153	348	0	14	Below LOD
BR07_112	0.338	0.034	0.0476	0.0018	0.14367	170	210	299.8	11	286	18	290	26	313.7	451.3	0.71308	704	0	11.8	0.019
BR07_113	0.35	0.041	0.0497	0.0019	0.22694	140	240	312.4	12	315	17	295	31	267	337	0.812775	466	0	12	0.013
BR07_114	0.404	0.021	0.05463	0.0017	0.29515	320	130	342.8	10	337	21	343	15	254	2117	0.123084	1240	0	211	0.023
BR07_115	0.44	0.058	0.0602	0.0037	0.018745	240	300	377	22	361	30	361	41	248.7	244.8	1.04221	368	0	21.7	0.006
BR07_116	0.512	0.029	0.0666	0.0022	0.3143	390	140	415.3	13	413	12	416	19	635	847	0.769094	367	0	21.3	0.071
BR07_117	9.51	0.41	0.4124	0.014	0.39609	2526	88	2224	64	2530	100	2381	39	164.8	720	0.234808	249	0	17.9	0.028
BR07_118	11.73	0.47	0.464	0.016	0.63347	2676	81	2456	70	2510	100	2576	39	173.4	419	0.424545	261	0	18.2	0.21
BR07_119	0.5	0.04	0.0645	0.0024	0.34789	390	180	403	15	489	37	407	27	113.2	709	0.163791	1200	0	15.6	0.51
BR07_120	0.344	0.031	0.0482	0.0018	0.24576	220	190	303.1	11	328	14	295	23	384	479	0.822403	651	0	23.6	0.172
BR07_121	14.48	0.38	0.5304	0.016	0.39672	2799	72	2741	67	2780	73	2776	25	208.3	642	0.332846	216	0	9.8	Below LOD
BR07_122	0.312	0.041	0.0437	0.0019	-0.1725	150	270	275.5	12	287	13	269	31	478.9	327.9	1.49828	1005	0	45.1	0.011
BR07_123	2.265	0.069	0.2022	0.0063	0.31771	1209	96	1186	34	1188	28	1197	22	1112	1173	0.972514	430	0	7.1	0.107
BR07_124	0.418	0.029	0.0562	0.002	-0.0041114	300	170	352.4	12	354	12	351	21	1073	927	1.18743	878	0	27.2	0.081
BR07_125	3.68	0.1	0.2803	0.0086	0.56435	1523	83	1592	43	1604	41	1565	24	607	1391	0.447662	366	0	12.8	Below LOD
BR07_126	0.374	0.037	0.0562	0.0021	0.22858	80	200	352.6	13	366	21	325	30	232.2	384	0.620326	261	0	14.7	Below LOD
BR07_127	0.315	0.03	0.0482	0.0017	0.056485	10	200	303.5	10	312	16	273	23	472	680	0.712069	754	0	8.4	Below LOD
BR07_128	0.38	0.023	0.051	0.0017	0.12832	290	150	320.4	10	329.5	9.5	324	17	1342	1367	1.0071	1273	0	7.8	0.076
BR07_129	0.87	0.043	0.1045	0.0032	0.082382	530	130	641	18	642	21	630	23	450	958	0.481877	493	0	11.4	0.023
BR07_130	0.361	0.034	0.049	0.0018	0.086022	200	200	308.1	11	321	27	306	25	115.6	415	0.285758	347	0	15.4	Below LOD
BR07_131	0.342	0.029	0.0489	0.0018	0.069608	130	180	307.6	11	314	14	294	22	546	520.2	1.07674	662	0	19.5	Below LOD
BR07_132	0.359	0.037	0.0475	0.0018	0.063225	230	220	298.8	11	300	16	304	27	336.8	400.7	0.862267	544	0	27.3	Below LOD
BR07_133	2.136	0.09	0.1925	0.006	0.44159	1143	110	1134	32	1143	45	1153	29	181.8	788	0.236677	1571	0	11.2	0.28
BR07_134	0.303	0.036	0.0474	0.0018	0.094909	-60	230	298.2	11	299	18	266	29	220.3	349.5	0.646631	451	0	7.6	Below LOD
BR07_135	0.474	0.036	0.063	0.0023	0.20352	280	170	394	14	421	33	389	25	122.1	732	0.171117	322	0	7.9	0.128
BR07_136	0.331	0.03	0.0487	0.0018	-0.20295	70	200	306.3	11	314	22	285	23	189.3	422	0.460179	1475	0	24.6	Below LOD
BR07_137	1.79	0.12	0.1706	0.0058	0.2007	960	160	1015	32	1040	73	1024	42	55.3	210	0.270144	214	0	7.5	Below LOD
BR07_138	2.363	0.083	0.2095	0.0064	0.25722	1185	100	1226	34	1271	34	1226	25	1720	1140	1.54779	402	0	13.7	0.244
BR07_139	0.383	0.021	0.0513	0.0018	0.44877	310	140	322.5	11	340	14	330	17	1108	1730	0.657026	926	0	11.6	17.5
BR07_140	0.333	0.04	0.0448	0.0018	0.28572	200	250	282.5	11	287	26	286	31	218.9	426.3	0.526768	640	0	5.4	1.03
BR07_141	1.757	0.07	0.1754	0.0056	0.1858	924	120	1041	31	1074	28	1023	26	947	444	2.18804	590	0	13.4	0.373
BR07_142	0.375	0.034	0.048	0.0018	0.081418	310	200	302.3	11	307	15	318	25	394.5	378	1.07064	379	0	8	Below LOD
BR07_143	0.63	0.042	0.0795	0.003	0.29161	420	160	493	18	503	18	495	27	617	819	0.772841	290	0	Below LOD	1.9
BR07_144	0.456	0.025	0.0589	0.0019	-0.17842	380	150	369	12	399	16	382	18	432	1068	0.414955	395	0	7.3	0.34
BR07_145	0.47	0.041	0.0554	0.0021	0.29302	510	200	347.7	13	390	24	384	28	164.6	308	0.548237	445	0	26.8	0.029
BR07_146	0.761	0.032	0.0955	0.0029	0.3424	452	120	587.9	17	581	38	575	19	98.2	1378	0.0731057	1070	0	7.8	Below LOD
BR07_147	0.387	0.036	0.0537	0.0017	0.15476	170	200	337.4	11	327	16	328	26	526	927	0.582096	790	0	5.4	Below LOD
BR07_148	0.352	0.045	0.0483	0.0019	0.065481	220	280	304	11	292	14	300	34	1690	362	4.78925	7450	0	19.6	12500
BR07_149	1.19	0.14	0.1285	0.006	-0.026908	660	280	778	34	815	74	772	66	48.8	129.6	0.386281	151	0	4.2	Below LOD
BR07_150	0.369	0.028	0.05	0.0017	0.13165	230	170	314.4	10	328	17	314	21	436	557	0.803009	518	0	9.1	0.053
BR07_151	0.367	0.026	0.0503	0.0017	-0.049348	230	170	316.1	11	314	15	314	19	619	815	0.779152	680	0	13.8	4.7
BR07_152	0.357	0.059	0.0477	0.0023	0.038955	140	310	300	14	328	23	302	44	264	181.8	1.4897	992	0	26.7	5.2
BR07_153	0.376	0.04	0.0534	0.002	0.13667	90	200	335.2	12	336	15	316	28	350.2	404.8	0.887492	521	0	34.6	0.034
BR07_154	1.65	0.11	0.1611	0.0063	0.2212	970	150	962	35	1094	45	981	40	255	690	0.379123	523	0	315	0.036
BR07_155	0.349	0.037	0.048	0.0019	0.047795	190	230	302.4	11	305	19	299	28	263	499	0.540685	472	0	13.7	0.05
BR07_156	0.412	0.029	0.0557	0.0018	0.19214	240	160	349.6	11	376	14	346	21	516	760	0.696506	685	0	21	3.1
BR07_157	0.351	0.051	0.0513	0.0022	0.2949	-50	250	322	13	338	27	292	37	179.2	251.5	0.730952	500	0	16	Below LOD
BR07_158	11.59	0.3	0.4971	0.015	0.65699	2520	68	2599	65	2646	62	2566	24	372.6	2674	0.142945	883	0	1.7	Below LOD
BR07_159	0.473	0.055	0.0618	0.0025	0.050607	290	250	386	15	396	29	385	38	181.6	418	0.445686	Below LOD	0	9.9	0.069
BR07_160	0.962	0.041	0.1092	0.0033	0.34683	684	120	668	19	831	91	684	22	32.5	1525	0.0218626	881	0	20.5	0.55
BR07_161	1.642	0.052	0.1688	0.005	0.15771	911	110	1005	28	1033	49	986	21	133.6	1339	0.102356	1276	0	12	0.36
BR07_162	0.419	0.023	0.0562	0.0018	0.036993	300	140	353.3	10	359	11	353	16	1310	1101	1.2206	3790	0	24	50.4
BR07_163	0.322	0.032	0.0477	0.0019	0.092328	80	200	300.4	12	290	13	282	25	499	356	1.43794	467	0	24.9	0.147
BR07_164	0.652	0.027	0.0845	0.0027	0.35046	396	110	523	16	535	14	507	16	1044	2465	0.434483	559	0	4.6	0.87
BR07_165	0.405	0.03	0.056	0.002	-0.0011066	240	170	351.3	12	352	14	344	22	592	645	0.941566	865	0	13.7	Below LOD
BR07_166	0.342	0.038	0.0489	0.0018	0.21716	110	220	307.7	11	323	19	296	29	291	373	0.800337	389	0	14.6	0.013
BR07_167	0.377	0.036	0.0503	0.0019	0.096015	300	220	316.5	12	371	18	322	27	1076	994	1.11049	1910	0	8.8	850
BR07_168	8.21	0.32	0.416	0.016	0.6332	2251	82	2242	74	2880	390	2249	34	157.7	2368	0.0683186	1390	0	15.1	3.4
BR07_169	1.85	0.15	0.174	0.0069	0.17372	1010	190	1033	38	1074	73	1045	55	82.9	157.2	0.540992	420	0	17.1	Below LOD
BR07_170	0.451	0.029	0.0623	0.0021	0.31204	240	150	389.6	13	409	16	374	20	364.2	995	0.375496	320	0	8.1	Below LOD
BR07_171	0.352	0.032	0.0542	0.0019	0.2318	0.1	180	340.3	12	339	10	301	24	960	693	1.42111	556	0	18.4	0.028
BR07_172	0.406	0.05	0.0546	0.0023	0.24362	210	250	343	14	339	24	339	37	132.9	213	0.64008	378	0	6.5	Below LOD
BR07_173	0.692	0.033	0.0847	0.0026	0.35238	513	120	523.8	15	551	18	530	20	562	1316	0.438096	488	0	16.4	Below LOD
BR07_174	0.353	0.021	0.0491	0.0016	0.11201	250	150	308.7	9.8	317	10	305	16	1385	1122	1.26633	3350	0	37	43.2
BR07_175	0.475	0.05	0.0674	0.0025	-0.052166	120	210	420	15	434	18	383	34	285	362	0.807654	595	0	21.7	0.023
BR07_176	0.368	0.029	0.0545	0.0019	0.23575	110	170	342.1	12	343	12	314	21	722	738	1.00362	692	0	9.2	0.034
BR07_177	0.439	0.042	0.0578	0.0023	0.27031	340	220	362	14	387	25	365	30	400	808	0.507853	9100	0	7.7	196
BR07_178	0.408	0.041	0.0564	0.0023	0.24724	230	220	354	14	353	24	344	29	361	712	0.520135	366	0	3.9	0.009
BR07_179	0.454	0.042	0.0608	0.0025	-0.013162	350	220	380	15	424	28	380	31	253	388	0.668926	14900	0	9.5	224
BR07_180	0.431	0.036	0.0576	0.0021	0.2374	260	180	361.2	13	356	16	357	25	515	564	0.936736	333	0	13	0.221
BR07_181	0.417	0.038	0.0559	0.002	-0.058619	270	200	350.7	12	351	18	349	26	406	671	0.620715	444	0	13.2	Below LOD
BR07_182	0.405	0.028	0.0545	0.0027	0.14762	320	170	342	16	341	20	344	20	863	1580	0.560328	1060	0	41	12.2
BR07_183	0.364	0.046	0.0486	0.0025	-0.14742	280	280	306	15	375	27	311	34	567	975	0.596578	850	0	41.1	7.28
BR07_184	0.423	0.045	0.0575	0.0024	0.088046	210	220	360	14	361	18	354	32	340	325	1.07321	690	0	15.4	2.11
BR07_185	0.345	0.028	0.05	0.002	0.0686	120	180	314.3	12	328	19	296	21	308.9	447	0.708923	601	0	9.2	Below LOD
BR07_186	0.757	0.045	0.0936	0.0031	0.33824	460	140	576	18	585	18	566	26	493	712	0.710323	172	0	12.6	0.023
BR07_187	0.697	0.032	0.0885	0.0027	0.20365	430	130	546.4	16	558	16	533	20	877	1461	0.615798	529	0	8.8	0.41
BR07_188	0.684	0.045	0.0873	0.0028	0.14974	400	160	539.6	16	519	30	522	27	224	484	0.474779	296	0	21.5	0.007
BR07_189	0.433	0.04	0.0573	0.002	0.17129	240	190	359.2	12	394	23	358	28	277	410	0.693082	389	0	19.9	0.45
BR07_190	0.666	0.085	0.0834	0.0038	-0.12715	330	280	516	23	529	26	493	51	184.6	140.3	1.34978	314	0	47.3	Below LOD
BR07_191	0.367	0.033	0.0497	0.0019	0.15802	220	190	312.5	12	321	14	312	24	516	469	1.12867	550	0	15.2	0.81
BR07_192	1.534	0.077	0.1615	0.0053	0.18042	800	130	965	29	933	36	935	31	221.2	410.8	0.552387	510	0	6.4	0.055
BR07_193	0.676	0.074	0.0841	0.0032	0.06535	330	230	520	19	547	39	505	45	83.6	199.1	0.430749	Below LOD	0	23.1	Below LOD
BR07_194	0.75	0.034	0.0915	0.003	0.35694	535	120	564	18	564	29	566	19	447	1738	0.263844	358	0	7.3	5.3
BR07_195	0.363	0.024	0.04993	0.0016	0.23401	250	160	314	9.7	321	12	315	19	1088	902	1.2374	1190	0	12.3	6.2
BR07_196	4.13	0.22	0.2917	0.0099	0.18614	1610	120	1649	50	1740	63	1653	43	509	465	1.12293	529	0	29.9	Below LOD
BR07_197	0.806	0.062	0.1001	0.0041	0.38833	460	170	615	24	652	41	596	34	664	1950	0.349319	362	0	28	0.62
BR07_198	0.363	0.046	0.0499	0.002	0.11053	140	250	313.7	12	309	15	308	35	448	283.2	1.62283	794	0	23.4	0.029
BR07_199	0.48	0.044	0.0625	0.0024	0.11433	310	200	390	14	401	19	391	30	561	502	1.14643	516	0	55	0.5
BR07_200	0.372	0.041	0.0498	0.0018	0.11438	230	230	313.1	11	328	22	315	30	385	545	0.724692	11300	0	9.8	79.3
BR07_201	0.51	0.04	0.0658	0.0023	0.13002	330	170	410.5	14	435	20	412	26	543	603	0.923786	252	0	8.1	Below LOD
BR07_202	0.429	0.031	0.0573	0.0022	0.1185	280	170	359	13	358	14	358	22	711	905	0.805954	647	0	10.3	1.4
BR07_203	0.372	0.034	0.0498	0.0018	0.14354	230	190	313.4	11	313	13	315	25	801	633	1.29813	658	0	18.5	0.071
BR07_204	4.04	0.14	0.2938	0.009	0.36725	1564	89	1659	45	1698	53	1639	29	297	485	0.628208	372	0	18.5	Below LOD
BR07_205	0.444	0.047	0.0581	0.0023	-0.00015918	250	230	364	14	364	24	363	33	168.3	348	0.496128	349	0	8.1	Below LOD
BR07_206	0.474	0.027	0.0644	0.0021	0.19781	270	130	402.2	13	412	16	394	18	520	1154	0.46226	279	0	4	0.082
BR07_207	0.398	0.071	0.0489	0.0022	0.12657	310	330	308	14	286	20	332	52	324	238	1.39655	319	0	15	0.144
BR07_208	0.449	0.025	0.062	0.002	0.1015	280	150	387.6	12	403	31	377	19	134.6	747	0.184847	1320	0	14.8	Below LOD
BR07_209	1.769	0.088	0.1733	0.006	0.3885	992	120	1030	33	997	41	1026	32	300	894	0.344249	2070	0	25.7	0.77
BR03_1	0.384	0.023	0.0515	0.0014	0.22916	310	120	323.7	8.7	346	13	327	17	216.8	422	0.527031	840	0	16	0.2
BR03_2	0.354	0.02	0.0495	0.0016	-0.15595	240	130	311.5	10	324	19	306	15	136.3	295	0.473983	293	0	5.34	Below LOD
BR03_3	0.468	0.064	0.0595	0.0031	0.25273	330	270	373	19	381	35	380	44	31.7	64.6	0.503403	348	0	6.1	0.19
BR03_4	0.381	0.043	0.0506	0.0018	0.11844	280	220	318.4	11	323	19	323	31	152	193	0.807933	222	0	7.3	0.025
BR03_5	0.574	0.039	0.0675	0.0022	0.55796	630	130	421	13	429	18	458	25	254	561	0.464472	1576	0	5.7	0.3
BR03_6	0.293	0.045	0.0412	0.0016	-0.027564	110	300	260	9.9	252	17	257	37	52.3	96.8	0.554262	163	0	13.3	0.0111
BR03_7	0.42	0.045	0.0552	0.0019	-0.10172	260	220	346	12	349	23	346	32	61.2	87.3	0.719161	438	0	9.8	2.41
BR03_8	0.377	0.021	0.052	0.0015	0.0055046	250	120	326.5	9	328	13	323	15	245	408	0.61602	162	0	4.13	Below LOD
BR03_9	1.616	0.075	0.162	0.0043	0.26622	937	88	967	24	971	27	968	28	230.1	198.6	1.18857	265	0	18.8	0.008
BR03_10	0.369	0.018	0.04997	0.0014	0.30852	310	100	314.3	8.3	317.9	9.7	319	14	423	490	0.885591	263	0	7.49	0.086
BR03_11	0.39	0.019	0.05342	0.0014	0.0050215	280	110	335.4	8.8	333	11	333	14	249.7	404	0.634054	371	0	4.64	1.34
BR03_12	0.382	0.03	0.0512	0.0015	-0.0094636	280	160	322	9	322	15	325	21	108.8	179.2	0.622845	209	0	8.5	0.0021
BR03_13	0.365	0.025	0.0491	0.0018	0.14856	300	150	309.1	11	321	17	314	19	122.6	340	0.369914	442	0	4.6	Below LOD
BR03_14	0.368	0.016	0.04945	0.0013	0.22197	325	93	311.1	8.2	310	12	317	12	119.5	382	0.320918	908	0	6.23	0.0032
BR03_15	0.382	0.019	0.0512	0.0016	0.293	350	110	321.5	9.7	321	14	327	14	156.2	406	0.394679	639	0	6.6	0.0096
BR03_16	0.288	0.028	0.0405	0.0014	0.15575	160	190	256	8.4	257	14	252	22	65.9	135.4	0.499293	394	0	5.11	Below LOD
BR03_17	0.317	0.024	0.04279	0.0013	0.14282	280	150	270	7.9	271	12	277	18	179.1	326	0.563595	382	0	4.33	0.062
BR03_18	0.318	0.018	0.04185	0.0012	0.25773	360	110	264.2	7.3	267	9.3	279	13	234	471	0.509664	587	0	3.43	5.7
BR03_19	0.385	0.02	0.04826	0.0013	0.13446	470	120	303.8	8	316	13	328	15	159.9	355	0.462071	351	0	5.3	0.028
BR03_20	0.324	0.03	0.0414	0.0013	0.33148	350	180	261.3	8.3	261	10	280	23	144.5	163	0.90943	260	0	15.3	0.021
BR03_21	0.288	0.015	0.03959	0.0011	0.35468	280	100	250.3	7	249.4	8.6	256	12	367.6	577	0.653565	348	0	6.06	1.78
BR03_22	0.361	0.023	0.0493	0.0014	0.17085	270	130	309.9	8.8	315	18	310	17	47.8	310.4	0.157977	1453	0	9.5	Below LOD
BR03_23	0.332	0.024	0.0491	0.0014	0.079302	120	150	309.2	8.8	303	13	288	19	89.1	161.4	0.566322	365	0	8.2	0.049
BR03_24	0.36	0.025	0.0495	0.0014	0.18124	250	140	311.4	8.6	307	10	309	18	168.1	222.2	0.776091	371	0	10.5	0.054
BR03_25	0.364	0.039	0.049	0.0018	0.082353	270	210	308.6	11	332	29	312	28	61.9	308	0.206172	572	0	6.4	0.056
BR03_26	0.336	0.022	0.048	0.0015	0.15578	210	140	302	9	290.7	9.2	291	17	268	208	1.32178	459	0	11	0.0109
BR03_27	0.365	0.023	0.04983	0.0014	0.24812	270	130	313.4	8.3	308	13	313	17	114.1	322	0.363512	656	0	7	Below LOD
BR03_28	0.379	0.021	0.0511	0.0015	0.14293	320	120	321	9.4	309	15	324	16	93.6	292	0.328838	632	0	7.3	0.0003
BR03_29	0.275	0.015	0.03923	0.0011	0.14416	210	120	248	7.1	251.6	8.4	245	12	327.3	512	0.65579	214	0	6.26	0.028
BR03_30	0.438	0.022	0.0534	0.0015	0.29667	569	97	335.6	9.2	343	15	366	15	204.6	379	0.553803	185	0	9.6	0.011
BR03_31	0.294	0.018	0.04259	0.0012	0.36755	190	120	268.8	7.2	262.8	8	262	15	249.3	334.2	0.765253	370	0	10	0.042
BR03_32	0.42	0.023	0.05602	0.0015	0.19428	370	120	351.4	8.9	370	12	354	16	208	424	0.503253	681	0	5.1	0.205
BR03_33	0.283	0.015	0.0395	0.0011	0.16594	280	110	249.7	6.9	240.9	7.2	254	12	427	470	0.932007	311	0	5.79	0.0066
BR03_34	0.268	0.041	0.0379	0.0017	0.17935	180	300	239.8	11	246	24	238	32	115.8	292	0.406832	266	0	7.4	Below LOD
BR03_35	0.357	0.023	0.04843	0.0013	0.19466	350	140	304.9	8	291	10	309	17	362.9	704	0.528814	724	0	9.7	0.032
BR03_36	0.286	0.017	0.04059	0.0011	0.065498	250	130	256.5	6.9	249	11	254	13	161.6	345.3	0.480102	464	0	3.2	3
BR03_37	0.472	0.034	0.0626	0.0032	0.633	370	120	391	19	387	24	388	23	179	344	0.533806	675	0	5.99	0.021
BR03_38	0.378	0.023	0.05296	0.0014	0.2287	240	130	332.7	8.5	318	11	322	17	198.5	283	0.719553	245	0	9.3	0.019
BR03_39	0.369	0.027	0.05	0.0016	0.14583	320	150	314.3	9.5	295	14	319	21	66.4	235	0.289861	384	0	4.33	Below LOD
BR03_40	0.304	0.021	0.0412	0.0014	0.29077	330	150	260.1	8.4	263.8	7.8	268	17	708	717	1.01299	535	0	5.2	0.545
BR03_41	0.282	0.014	0.0402	0.0011	0.20583	230	110	254	6.9	242.7	8.1	251	11	322	388	0.85136	278	0	8.04	0.0086
BR03_42	0.27	0.028	0.0375	0.0013	0.086848	240	210	237.3	8.1	248	12	240	22	125.8	165.1	0.781668	315	0	18.3	0.059
BR03_43	0.645	0.075	0.0463	0.0016	0.50814	1540	180	291.5	9.7	448	45	494	43	219.9	377	0.598374	1127	0	6.4	12.24
BR03_44	0.363	0.019	0.0491	0.0013	0.12294	330	110	309	8.2	297	12	312	14	103.2	390	0.271459	805	0	4.51	0.38
BR03_45	0.41	0.033	0.0497	0.0015	0.060752	530	180	312.9	9.2	303	11	346	24	266	404	0.675444	227	0	203	0.104
BR03_46	0.398	0.067	0.049	0.0033	0.35735	500	330	309	20	354	29	336	48	107.7	168	0.657651	204	0	17.7	0.082
BR03_47	0.292	0.03	0.0416	0.0014	0.31654	150	190	262.4	8.7	264	15	257	23	184	264	0.714995	274	0	7.8	0.05
BR03_48	0.291	0.022	0.03924	0.0011	0.17691	280	150	248.1	6.7	238	10	256	17	205.3	288.9	0.729005	413	0	11.4	Below LOD
BR03_49	0.294	0.017	0.04025	0.0011	0.17377	280	110	254.3	6.5	260.1	8.5	260	13	259.7	495	0.538215	274	0	6.26	0.43
BR03_50	0.363	0.016	0.05056	0.0014	0.31776	251	88	317.9	8.3	307	17	313	12	48.5	571	0.0871354	974	0	2.11	0.0065
BR03_51	0.36	0.022	0.0483	0.0015	0.074713	320	130	304.1	9	290	11	310	16	142	303	0.480767	522	0	5.13	0.0105
BR03_52	0.382	0.017	0.04938	0.0013	0.23703	418	91	310.7	7.9	306.2	7.1	327	12	630	697	0.92725	1110	0	2.77	0.72
BR03_53	0.353	0.015	0.04959	0.0013	0.15971	243	92	312	7.9	305.6	9	306	11	136.6	813	0.172365	1418	0	4.44	Below LOD
BR03_54	0.277	0.013	0.03909	0.0011	0.078398	230	100	247.2	6.6	252.1	5.9	248	10	347	575	0.619085	290	0	4.25	0.119
BR03_55	0.357	0.031	0.0497	0.0016	0.23582	190	170	312.8	10	310	12	305	23	121.1	150.7	0.824366	293	0	9.2	0.0085
BR03_56	0.423	0.025	0.0521	0.0015	0.15625	510	130	327.4	9.3	327	12	359	19	173.1	296.4	0.599112	657	0	10	0.589
BR03_57	0.382	0.022	0.0539	0.0015	0.099992	220	120	338.5	9.4	335	12	326	16	137.3	266	0.529515	194	0	5.86	0.016
BR03_58	0.284	0.016	0.03932	0.001	0.098235	250	120	248.6	6.3	250.7	9.9	252	13	251.2	423	0.609212	238	0	7.8	0.046
BR03_59	0.364	0.02	0.05091	0.0014	0.095044	240	120	320.1	8.8	322	14	313	15	86.2	329.9	0.268049	736	0	4.18	Below LOD
BR03_60	0.407	0.029	0.0549	0.0017	0.072049	280	150	344.4	10	356	19	342	21	90	148.3	0.622573	165	0	9.42	0.0067
BR03_61	0.287	0.014	0.03939	0.001	0.058108	300	110	249.1	6.4	245.6	7.5	255	11	450	532	0.86774	288	0	5.95	0.033
BR03_62	0.369	0.021	0.0498	0.0015	0.22138	340	120	313.3	9.3	320	15	322	16	86.4	272.7	0.325026	1090	0	7.5	Below LOD
BR03_63	0.373	0.022	0.0503	0.0015	0.16119	290	120	316.4	9.1	300	14	319	16	90.8	223.5	0.416771	717	0	9.2	0.0039
BR03_64	0.3	0.023	0.04206	0.0012	0.028227	220	170	265.5	7.6	267	15	265	18	115.6	284.9	0.41625	2400	0	2.39	16.2
BR03_65	0.3	0.021	0.0397	0.0012	0.31465	340	130	250.9	7.3	266.8	9.9	264	16	338	344	1.00797	215	0	6	0.039
BR03_66	0.391	0.021	0.0537	0.0015	0.12361	280	110	337	9.3	334	12	333	15	125.2	277	0.463675	387	0	4.6	0.058
BR03_67	0.38	0.026	0.0504	0.0016	0.072069	330	150	317.1	10	325	16	326	19	196.5	518	0.389154	607	0	7.1	0.134
BR03_68	0.828	0.035	0.0973	0.0027	-0.1194	610	110	599	16	583	12	614	18	257	366	0.720346	365	0	7.8	0.016
BR03_69	0.388	0.035	0.0524	0.0021	0.006377	270	190	329	13	318	15	330	25	168.8	202.5	0.855138	214	0	6.2	0.027
BR03_70	0.444	0.018	0.04179	0.0012	0.35165	1076	78	263.9	7.7	269.9	6.5	372	12	1596	1413	1.15872	899	0	10.7	8.66
BR03_71	0.291	0.022	0.0415	0.0015	-0.053948	170	160	262.2	9.3	264	10	258	17	304	369	0.845155	323	0	9.9	0.024
BR03_72	0.447	0.021	0.0596	0.0018	0.019418	420	140	373.1	11	391	15	374	15	474	796	0.610878	402	0	6.5	1.21
BR03_73	0.314	0.032	0.0443	0.0016	-0.10018	210	220	279.1	10	282	16	273	25	80.1	111.3	0.738289	117	0	8.3	Below LOD
BR03_74	0.341	0.017	0.04868	0.0014	0.30468	210	100	306.4	8.5	309.7	9.7	297	13	188.1	361	0.534528	735	0	7.57	0.064
BR03_75	0.373	0.02	0.05165	0.0014	-0.090511	250	120	324.6	8.4	310.8	9.6	320	15	201.3	381.7	0.541017	272	0	6.2	0.0066
BR03_76	0.389	0.023	0.0534	0.0015	0.26387	250	120	335.4	9.2	332.9	9.1	331	17	310	261	1.21846	601	0	9.5	0.039
BR03_77	0.401	0.022	0.05149	0.0014	0.053216	390	130	323.6	8.9	332.2	9.7	339	16	226	307	0.755195	200	0	8.6	0.0117
BR03_78	0.378	0.028	0.0522	0.0015	0.16672	210	150	328.1	9.1	325	13	321	20	98	170.7	0.588954	277	0	3.88	0.354
BR03_79	0.277	0.03	0.03861	0.0012	-0.0075101	150	210	244.1	7.7	245.7	9.5	243	24	108.5	160.7	0.692632	155	0	17.9	0.093
BR03_80	0.287	0.014	0.03956	0.001	0.030582	260	110	250.1	6.5	255	7.6	255	11	297.3	519	0.587647	230	0	5.6	0.034
BR03_81	0.272	0.012	0.03875	0.0011	0.2007	203	93	245.1	6.9	255.3	6.2	243.8	9.2	763	910	0.860146	372	0	4.56	1.03
BR03_82	0.357	0.016	0.03968	0.0011	0.29372	719	93	250.8	6.7	276.1	7.2	309	12	581	690	0.863806	222	0	10.4	1.01
BR03_83	0.351	0.015	0.04838	0.0012	0.12494	275	95	304.5	7.4	314	11	304	11	205.8	584	0.361511	581	0	4.8	1.41
BR03_84	0.356	0.015	0.04967	0.0013	0.29356	229	88	312.5	7.7	308	13	308	11	105.8	451.5	0.24039	841	0	4.32	Below LOD
BR03_85	0.359	0.024	0.0501	0.0016	0.27598	220	140	315	9.8	327	14	310	18	222	383	0.594625	137	0	2.16	0.044
BR03_86	0.367	0.027	0.0516	0.0015	0.14078	240	160	324.6	9.1	319	15	316	20	258	417	0.634706	890	0	1.4	10.5
BR03_87	0.367	0.042	0.0514	0.0025	0.084411	190	240	323	15	323	19	313	31	68.6	125.4	0.561197	168	0	4.7	Below LOD
BR03_88	0.371	0.055	0.0507	0.0023	0.32569	200	290	319	14	338	20	313	41	81.7	122.2	0.685867	2830	0	5.9	23.1
BR03_89	0.324	0.027	0.04067	0.0012	0.16989	430	180	257	7.1	293	18	285	22	70.9	154.4	0.471073	227	0	5.72	0.038
BR03_90	4.012	0.076	0.2804	0.0069	0.25288	1681	36	1593	35	1611	30	1634	15	359.3	613	0.601292	189	0	6.11	0.509
BR03_91	0.299	0.015	0.04125	0.0011	0.26371	290	110	260.6	6.8	275	10	264	11	253	629	0.412628	284	0	1.99	Below LOD
BR03_92	0.352	0.024	0.04856	0.0014	0.056174	220	140	305.6	8.4	310	11	303	17	170	195.5	0.892054	209	0	5.67	Below LOD
BR03_93	0.315	0.025	0.0444	0.0013	0.069361	180	160	279.9	8.3	284	15	274	19	75.2	153	0.504215	257	0	6.53	0.0031
BR03_94	0.29	0.023	0.0398	0.0014	0.087475	260	170	251.3	8.8	255	10	256	18	123.9	147.4	0.862309	286	0	8.4	0.0082
BR03_95	0.362	0.016	0.05099	0.0013	0.17541	221	98	320.6	7.9	324	11	312	12	154.8	410	0.387325	575	0	2.17	0.0138
BR03_96	0.356	0.017	0.04853	0.0013	0.21548	280	100	305.4	8.1	309	12	308	13	118.5	397.6	0.305746	491	0	3.31	Below LOD
BR03_97	0.736	0.05	0.0842	0.0026	0.44288	650	130	521	16	505	21	554	29	74.2	144.2	0.527871	180	0	12.5	0.14
BR03_98	0.253	0.033	0.03827	0.0012	0.023726	70	260	242.1	7.8	236	18	226	27	107.7	172.7	0.639753	275	0	7.5	0.0022
BR03_99	0.348	0.022	0.04751	0.0013	0.32836	290	130	299.2	8.1	309	11	301	17	236	443	0.546509	366	0	7.3	0.06
BR03_100	0.355	0.024	0.04901	0.0014	0.037199	230	140	308.4	8.6	302.2	9.8	305	18	193	290	0.682729	447	0	7.8	1.09
BR03_101	0.325	0.021	0.04294	0.0013	0.27674	340	130	271	7.9	322	24	283	16	41	258.5	0.162709	1264	0	10.5	0.015
BR03_102	0.402	0.029	0.0565	0.0018	0.15942	200	150	354.3	11	372	16	339	21	115	206	0.57269	196	0	8.4	0.0031
BR03_103	0.285	0.035	0.0421	0.0015	0.041126	20	230	265.6	9.2	264	16	247	27	55.1	97.3	0.580935	184	0	9	Below LOD
BR03_104	0.279	0.028	0.0388	0.0019	-0.10461	230	230	246	12	252	16	248	22	349	467	0.766651	647	0	4.7	0.2
BR03_105	0.352	0.028	0.0478	0.0016	0.23952	260	160	300.7	9.7	303	10	302	21	156.1	137.1	1.16803	414	0	17.7	0.0034
BR03_106	0.289	0.034	0.0422	0.0014	0.13408	40	210	266.1	8.4	262	13	251	26	86.6	111.6	0.796054	272	0	13.7	0.002
BR03_107	0.292	0.022	0.0404	0.0011	0.17357	220	150	255.3	7.1	252.4	9.1	257	17	154.3	193.3	0.818885	251	0	8.1	0.03
BR03_108	0.799	0.024	0.0975	0.0024	0.040463	553	74	599.7	14	584.4	9.7	594	14	607	513	1.21384	219	0	10.7	0.32
BR03_109	0.595	0.017	0.07747	0.0019	0.16762	415	64	481	11	484.1	9.7	473	11	515	996	0.530441	435	0	2.84	0.2
BR03_110	1.326	0.031	0.1442	0.0034	0.24773	820	54	868	19	868	19	855	14	130.8	486	0.276096	132	0	2.79	0.0048
BR03_111	0.251	0.021	0.03957	0.0012	0.15654	-40	160	250.1	7.6	260	13	225	17	119.2	211	0.579539	393	0	4.49	0.0078
BR03_112	0.311	0.016	0.0434	0.0014	0.20395	240	110	273.7	8.4	287	12	274	13	124.3	426	0.29933	906	0	3.88	0.0134
BR03_113	0.802	0.039	0.0969	0.0025	-0.083665	550	110	596.1	15	581	19	593	22	124.4	224.5	0.568451	293	0	2.53	0.081
BR03_114	1.549	0.058	0.1573	0.0041	0.26374	924	74	941	23	917	34	949	24	56.4	197.2	0.293401	305	0	4.86	0.06
BR03_115	1.482	0.069	0.1459	0.007	0.91492	997	38	877	40	807	45	919	29	244	635	0.39419	458	0	7.1	0.078
BR03_116	0.45	0.032	0.0479	0.0015	0.23125	830	150	301.6	9	359	18	375	22	241	568	0.435269	896	0	4.6	2.17
BR03_117	0.299	0.024	0.0417	0.0013	0.1143	210	170	263.2	8.3	262	11	262	19	100.8	168	0.615517	298	0	6.2	Below LOD
BR03_118	0.37	0.019	0.04966	0.0013	-0.0097388	310	110	312.4	7.9	317	9.5	317	14	214	324.3	0.676949	182	0	10.7	0.093
BR03_119	0.371	0.021	0.05109	0.0014	0.028653	270	120	321.1	8.4	319.9	9.5	318	15	328	426.1	0.78968	316	0	7.22	0.0038
BR03_120	0.291	0.024	0.0405	0.0014	0.21434	210	170	256	8.8	273.3	9.5	256	19	177.6	217.8	0.836516	154	0	11.5	0.015
BR03_121	0.368	0.017	0.0488	0.0013	0.15623	350	100	307.1	7.8	310	11	317	13	148.8	374.8	0.407279	454	0	5.76	Below LOD
BR03_122	0.286	0.028	0.0395	0.0015	0.090271	240	220	249.8	9.5	267	14	254	23	186.9	291.7	0.657297	440	0	12.6	Below LOD
BR03_123	0.365	0.016	0.05078	0.0013	0.13628	256	95	319.3	8.1	318.2	8.6	315	12	281.8	422	0.685042	311	0	4.57	Below LOD
BR03_124	0.364	0.033	0.03962	0.0012	0.24534	680	170	250.4	7.6	295	17	310	23	123	207	0.60957	234	0	6.83	0.19
BR03_125	0.449	0.039	0.0599	0.0024	0.064257	310	190	375	14	358	29	374	27	80.2	365	0.225409	209	0	8.6	Below LOD
BR03_126	0.505	0.032	0.0661	0.0033	0.39134	400	140	412	20	400	44	413	22	61.9	297	0.213808	131	0	4.2	Below LOD
BR03_127	0.351	0.019	0.04951	0.0014	0.11706	210	110	311.4	8.4	299	11	304	14	181.5	403	0.46202	532	0	5.82	0.16
BR03_128	0.264	0.027	0.0409	0.0014	-0.21844	-10	210	258.2	8.8	241	14	233	22	59.9	111.9	0.549143	418	0	9	Below LOD
BR03_129	0.413	0.024	0.057	0.0018	0.025039	270	130	357.1	11	356	18	350	17	135.6	540	0.257605	1053	0	7.9	Below LOD
BR03_130	0.385	0.019	0.05335	0.0015	-0.088514	250	110	335	9	329.3	8.9	329	13	190.7	338	0.578793	233	0	4.13	0.0004
BR03_131	0.353	0.047	0.0468	0.0023	0.41742	300	250	295	14	316	18	303	35	296	260	1.1679	1860	0	34.5	11.6
BR03_132	0.377	0.024	0.0514	0.0015	0.031845	280	140	323.2	9.2	329	10	322	17	171.5	247.5	0.71085	182	0	5.14	0.0109
BR03_133	1.327	0.077	0.0998	0.0045	0.82436	1510	68	612	27	1279	48	847	34	87.4	294	0.304967	787	0	7.59	0.0159
BR03_134	0.435	0.024	0.0482	0.0018	0.098273	730	130	303.7	11	302	11	365	17	901	1148	0.805141	601	0	8.2	3.53
BR03_135	0.375	0.018	0.0524	0.0015	0.061212	260	110	329.2	9	312	14	322	13	81.9	402	0.209	753	0	7.6	0.0019
BR03_136	0.366	0.026	0.05	0.0015	0.050181	260	150	314.7	9.1	319	12	314	19	134.8	213.8	0.646802	192	0	6.5	0.82
BR03_137	0.402	0.026	0.0496	0.0015	0.0075789	470	140	312	9.2	346	16	340	19	87.9	207.1	0.435409	494	0	8.89	0.035
BR03_138	0.752	0.019	0.0918	0.0025	0.51766	582	49	566.1	14	554	31	568	11	61.8	890	0.071234	327	0	11.1	0.518
BR03_139	1.63	0.18	0.095	0.0062	0.94091	1830	130	583	37	610	48	930	74	135.1	305.2	0.454109	601	0	8.76	Below LOD
BR03_140	0.396	0.019	0.0476	0.0014	0.3245	590	100	299.8	8.9	335	11	341	15	450	776	0.594894	820	0	7.3	0.324
BR03_141	0.366	0.022	0.04936	0.0013	0.17957	300	130	310.5	8.3	310.8	9.8	317	17	224.5	349.3	0.659336	215	0	5.04	0.0028
BR03_142	0.361	0.02	0.04969	0.0014	0.089132	260	120	312.6	8.6	297	10	311	15	147.6	275.2	0.550208	267	0	4.58	0.0046
BR03_143	0.352	0.016	0.05032	0.0014	0.24748	193	96	316.5	8.3	312.8	9.2	305	12	314	372	0.865916	196	0	8.6	0.046
BR03_144	0.462	0.016	0.03252	0.0009	0.27303	1654	62	206.3	5.6	261.6	5.1	385	11	1130	1541	0.752254	1230	0	16.9	18.5
BR03_145	0.331	0.037	0.0456	0.0018	-0.10914	230	250	287.2	11	288	17	286	29	143.2	173.8	0.845244	138	0	5.4	0.0053
BR03_146	0.365	0.029	0.0508	0.0016	0.052223	200	160	319.5	9.7	320	17	311	22	60.9	181	0.345166	585	0	11.5	Below LOD
BR03_147	0.376	0.021	0.05024	0.0014	0.091876	320	120	315.9	8.5	303	11	322	16	146.9	361.2	0.417218	615	0	6.7	Below LOD
BR03_148	0.398	0.035	0.04601	0.0012	0.47342	550	150	289.9	7.6	336	25	335	24	225.9	540	0.429152	580	0	4.62	0.191
BR03_149	0.373	0.025	0.0504	0.0017	0.36747	310	160	317	10	326	15	320	19	195.2	390	0.513457	174	0	1.85	0.022
BR03_150	0.346	0.018	0.04957	0.0013	0.15554	180	110	311.8	8.2	326	30	300	13	28.1	409.5	0.0703949	1024	0	3.45	Below LOD
BR03_151	0.349	0.027	0.05	0.0015	0.074861	150	160	314.6	9.4	309	15	300	20	83.2	181.1	0.471296	140	0	7.8	Below LOD
BR03_152	0.344	0.035	0.0504	0.0019	-0.10605	210	270	316.8	12	324	29	313	37	77	279	0.283123	1330	0	11.7	Below LOD
BR03_153	0.402	0.02	0.05456	0.0015	0.14055	300	110	342.4	8.9	352	12	341	15	175.4	300.2	0.599388	250	0	9.3	0.015
BR03_154	0.297	0.021	0.0411	0.0013	0.47933	250	130	259.4	8.4	282	10	262	16	422	568	0.762172	452	0	7.8	0.0081
BR03_155	0.371	0.019	0.04996	0.0014	0.048638	320	120	314.2	8.7	310	15	319	14	75.7	338	0.229757	763	0	5.39	Below LOD
BR03_156	0.271	0.018	0.03982	0.0011	0.025813	120	140	251.7	6.9	251.7	9	241	15	141.3	236.3	0.613433	313	0	8.5	Below LOD
BR03_157	0.361	0.027	0.0514	0.0015	-0.047976	170	150	323	9.2	311	12	309	20	120.5	209.6	0.589773	217	0	14.3	Below LOD
BR03_158	0.362	0.031	0.0501	0.0018	0.48237	220	170	315	11	341	24	312	23	91.9	341.6	0.275986	776	0	5	0.011
BR03_159	0.291	0.026	0.0425	0.0013	-0.048014	100	170	268.2	8.3	255	13	255	20	89.5	147.9	0.620789	187	0	5.9	0.0033
BR03_160	0.363	0.017	0.04899	0.0014	0.20433	340	98	308.2	8.5	304	13	313	13	92.1	479	0.197248	681	0	3.11	0.0134
BR03_161	0.301	0.014	0.04263	0.0011	0.11576	210	100	269.1	6.7	252	11	266	11	147.9	622	0.243931	1639	0	4.87	Below LOD
[truncated: 169 more rows]

## Sheet: PlotDat8
Source sheet	Sheet7	0	0	210	0	0	0
[truncated: 2,000 more rows]

## Sheet: PlotDat11
Source sheet	Triassic	200	1.60855e-08	219.2	0	200	0
[truncated: 2,000 more rows]

[truncated: 5 more sheets: PlotDat7, PlotDat1, PlotDat10, PlotDat17, PlotDat6]
